# Supplementary material for: High-elevation orogenic plateau influences ecosystems
Source: Research Square preprint supplement (doi:10.21203/rs.3.rs-5816615/v1), 2025-01-23
Supplement: Supplementary file 1 [file 5350874844f0d75450b886f1.xlsx]

## Sheet: Sheet1
Table3 The results of chemical mohometry of the northeastern Asia arc
Region	Time Interval	Moho Depth (Km) (Median)	Error (Median)	Paleoelevation (Km) (Median)	Error (Median)	Number of Input Individual analysis	Number of Quality-filtered individual analysis	Max. REM Residuals (Km)	Max. RMSE (Km)	Reject sensors containing less than data	Reject sensors present in less than MgO bins	Filter sensors by their STD, MAD on estimated Moho (Km)	Number of mohometer (MAD)	Number of sensors	MgO bin size	A	Major element totals (%)
STHM	135-125	47.7	3.9	3.13852	0.574713	101	53	1	0.5	4	3	1-5	63	21	1	1.7	95-101
NTHM	146-138	53.4	4.2	3.97849	0.618921	94	66	1	0.5	5	3	1-5	102	25	1	1.7	95-101
NTHM	133-120	55.9	3.8	4.34689	0.559976	122	99	1	0.5	5	3	1-5	92	19	1	1.7	95-101
YSM	173-160	56	3.8	4.36163	0.559976	132	125	1	0.5	5	3	1-6	75	18	1	1.7	95-101
YSM	160-150	53.2	3.5	3.94901	0.515768	149	129	1	0.5	5	3	1-5	99	27	1	1.7	95-101
YSM	140-125	55.5	3.6	4.28795	0.530504	176	141	1	0.5	5	3	1-5	80	20	1	1.7	95-101
YSM	125-122	56.3	2.7	4.40584	0.397878	210	130	1	0.5	5	4	1-5	145	23	1	1.7	95-101
SGXR	160-140	47	4.5	3.03537	0.66313	163	146	1	0.5	4	3	1-6	88	24	1	1.7	95-101
SGXR	140-130	44.9	2.7	2.72591	0.397878	194	184	1	0.5	5	3	1-5	48	16	1	1.7	95-101
SGXR	130-120	45	2.8	2.74064	0.412614	215	203	1	0.5	5	3	1-5	84	23	1	1.7	95-101
NGXR+EGN	206-186	41.4	2.2	2.21014	0.324197	65	62	1	0.5	5	3	1-5	48	18	1	1.7	95-101
NGXR+EGN	180-160	56.3	2	4.40584	0.294724	104	88	1	0.5	4	3	1-6	61	23	1	1.7	95-101
NGXR+EGN	143-128	50.7	4.6	3.58061	0.677866	150	139	1	0.5	5	4	1-6	80	20	1	1.7	95-101
NGXR+EGN	128-112	51.7	3.4	3.72797	0.501032	147	138	1	0.5	5	4	1-5	137	30	1	1.7	95-101
SB	115-102	41.9	4.4	2.28382	0.648394	224	179	1	0.5	4	2	1-5	59	22	1	1.7	95-101
ZGR+JR	210-196	33.9	5.7	1.10492	0.839965	75	74	1	0.5	2	3	1-6	106	24	1	1.7	95-101
ZGR+JR	196-184	37.8	5.9	1.67963	0.869437	92	79	1	0.5	4	3	1-6	139	28	1	1.7	95-101
ZGR+JR	183-173	47.1	4.7	3.0501	0.692602	134	132	1	0.5	4	3	1-5	98	27	1	1.7	95-101
ZGR+JR	113-100	49.4	5.2	3.38904	0.766284	56	40	1	0.5	4	2	1-6	72	25	1	1.7	95-101
LDP	135-125	52.8	3.2	3.89007	0.471559	142	117	1	0.5	5	3	1-5	101	23	1	1.7	95-101
LDP	124-116	52.8	3.7	3.89007	0.54524	119	97	1	0.5	5	3	1-5	122	25	1	1.7	95-101
JDP	133-125	52.9	3.8	3.9048	0.559976	210	127	1	0.5	5	5	1-5	142	21	1	1.7	95-101
JDP	125-110	53.4	4.9	3.97849	0.722075	197	76	1	0.5	5	3	1-6	98	17	1	1.7	95-101
KP	192-179	47.2	4.4	3.06484	0.648394	106	103	1	0.5	4	3	1-6	91	25	1	1.7	95-101
KP	179-165	52.1	1.9	3.78691	0.279988	128	128	1	0.5	5	2	1-5	40	20	1	1.7	95-101
KP	112-109	54.7	2.7	4.17006	0.397878	50	43	1	0.5	4	3	1-5	44	13	1	1.7	95-101
Notes: STHM—Southern Taihangshan; NTHM—Northern Taihangshan; YSM—Yanshan Mountains; SB—Songliao Basin; JDP—Jiaodong Peninsula; SGXR—Southern Great Xing'an Range; NGXR—Northern Great Xing'an Range; KP—Korea Peninsula; EGN—Erguna Region. For parameter definitions the reader is referred to Luffi and Ducea (2022).
