# Supplementary material for: High-elevation orogenic plateau influences ecosystems
Source: Research Square preprint supplement (doi:10.21203/rs.3.rs-5816615/v1), 2025-01-23
Supplement: Supplementary file 2 [file 67fcc0a2fca560121c5256d1.xlsx]

## Sheet: Sheet1
Region	Method	Number	Details	Timing	Reference
Jiaodong Peninsula (JDP)	Thermochronology	1	Intrusives rapid cooling	130-105 Ma	Yang et al., 2020, Lithos
	Tectonics	2	Stress inversion and chronology	135-93 Ma	Zhang et al., 2020, Journal of Structural Geology
	Sedimentary	3	Jiaolai basin; laiyang Group	135-93 Ma	Zhang et al., 2020, Journal of Structural Geology
Liaodong Peninsula (LDP)	Thermochronology	4	Fenghuangshan and Xiemashan granites rapid cooling	110-100 Ma	Wang et al., 2022, Gondwana Research
		5	Liaonan MCC rapid cooling	120-107 Ma	Yang et al., 2007, GSA Bulletin
		5	Liaonan MCC rapid cooling	122-111 Ma	Lin et al., 2011, JAES
	Tectonics	6	Liaodong Peninsula extension	135-100 Ma	Liu et al., 2020, GSA Bulletin
		7	Tianshifu-Dongyingfang thrusting	171-163 Ma	Ren et al., 2022, GSA Bulletin
	Sedimentary	8	Suzihe and Dandong basins	123-100 Ma	Zhou et al., 2021, PNAS
Taihangshan (THM)	Thermochronology	9	Bedrock rapid cooling	155-135 Ma	Clinkscales et al., 2020, EPSL
		10	Bedrock rapid cooling	160-135 Ma	Cao et al., 2015, JAES
		11	Bedrock rapid cooling	162-145 Ma	Zhang et al., 2021, Tectonophysics
	Tectonics	12	Taihang-Luliangshan fold belt	160-135 Ma	Clinkscales and Kapp, 2019, Lithosphere
		13	Taihang-Luliang Shan thrust-fold zone	170-135 Ma	Zhang et al., 2022, Tectonophysics
		14	Yungang Basin deformation	170-160 Ma	Zhang et al., 2020, Tectonophysics
		15	Taihangshan deformation	Late Jurassic	Zhang et al., 2020, JAES
Yanshan Mountains (YSM)	Thermochronology	16	Rapid cooling and exhumation	170-140 Ma	Wang et al., 2024, GSA Bulletin
		16	Rapid cooling and exhumation	140-90 Ma	Wang et al., 2024, GSA Bulletin
		17	Yiwulvshan MCC rapid cooling and exhumation	130-115 Ma	Wu et al., 2013a,b, Gondwana Research
		18	Xingcheng-Taili rapid cooling and exhumation	160-140 Ma	Liang et al., 2022, Gondwana Research
		18	Yiwulvshan MCC rapid cooling and exhumation	130-100 Ma	Liang et al., 2022, Gondwana Research
		19	Yagan MCC rapid cooling and exhumation	134-124 Ma	Wang et al., 2012, Lithos
		20	Hohhot MCC rapid cooling and exhumation	135-120 Ma	Wang et al., 2012, Lithos
		21	Yunmengshan MCC rapid cooling and exhumation	140-112 Ma	Wang et al., 2012, Lithos
		22	Yunmengshan MCC Sihetang shear zone	140-137 Ma	Zhu et al., 2015, Tectonophysics
		22	Yunmengshan MCC Shuiyu shear zone	131-114 Ma	Zhu et al., 2015, Tectonophysics
	Tectonics	23	Xuanhua basin Likouquan thrusting	Initiation: 147 Ma	Lin et al., 2021, Basin Research
		23	Xuanhua basin Mapu thrusting	Initiation: 138 Ma	Lin et al., 2021, Basin Research
		24	Chicheng basin Shangyi‐Pingquan thrusting	162-147 Ma	Lin et al., 2019, Tectonics
		24	Chicheng basin Fengning‐Longhua thrusting	140-135 Ma	Lin et al., 2019, Tectonics
		25	Luanping basin thrusting	134-133 Ma	Ma et al., 2023, Geology
		26	Central Yanshan belt thrusting	171-165 Ma	Li et al., 2016, Tectonics
		26	Central Yanshan belt thrusting	152-135 Ma	Li et al., 2016, Tectonics
		27	Qianjiadian Basin growth strata	Initiation: 141 Ma	Shi et al., 2019, Science China Earth Sciences
		28	Guojiadian basin thrust system	Middle-earliest Late Jurassic	Liu et al., 2021, Basin Research
		29	Compression deformation	153-141 Ma	Hou et al., 2023, JAES
		30	Zhangjiakou basin fold-thrusting	Middle Jurassic-earliest Cretaceous	Liu et al., 2018, Science China Earth Science
		31	Yunmengshan MCC thrusting shear zone	170-150 Ma	Pei and Liu, 2016, Acta Petrologica Sinica (In chinese with English Abstract)
		32	Shortening deformation	170-165 Ma	Wu et al., 2021, Tectonophysics
		33	Yiwulvshan MCC compressional event	Late Jurassic-Earliest Cretaceous	Wu et al., 2013a,b, Gondwana Research
	Sedimentary	34	Xiahuayuan basin	194-158 Ma	Lin et al., 2018, Sedimentary Geology
		35	Intermontane basins	135-100 Ma	Zhou et al., 2021, PNAS
Great Xing'an Range (GXR)	Thermochronology	36	Rapid cooling and exhumation	155-110 Ma	Wu et al., 2023, GRL
Erguna Region (ER)		37	Rapid cooling and exhumation	145-110 Ma	Zhang et al., 2022, International Geology Review
		38	Rapid cooling and exhumation	145-100 Ma	Zhang et al., 2022, Journal of Earth Science
		39	Rapid cooling and exhumation	145-100 Ma	Sun et al., 2022, Journal of Geology
	Sedimentary and Tectonics	40	Basin accumulation and defromation	136-100 Ma	Zhang et al., 2017, Earth-Science Review
		41	Basin accumulation and defromation	164-138 Ma	Guo et al., 2023, Earth-Science Review
		41	Basin accumulation and defromation	138-100 Ma	Guo et al., 2023, Earth-Science Review
Songliao Basin (SB)	Sedimentary	42	Main sediment accumulation	136-106 Ma	Zhang et al., 2017, Earth-Science Review
		43	Foreland basin period	Early-Middle Jurassic	Li et al., 2021, Earth-Science Review
Zhangguangcai Range (ZGR)	Thermochronology	44	Rapid cooling and exhumation	193-165 Ma	Wang et al., 2021, Tectonophysics
Jiamusi Region (JR)		44	Rapid cooling and exhumation	156-113 Ma	Wang et al., 2021, Tectonophysics
		45	Rapid cooling and exhumation	200-170 Ma	Chen, 2016, Doctoral dissertation of Zhejiang University
		45	Rapid cooling and exhumation	165-100 Ma	Chen, 2016, Doctoral dissertation of Zhejiang University
		46	Rapid cooling and exhumation	200-150 Ma	Zhou et al., 2024, Tectonics
		46	Rapid cooling and exhumation	150-110 Ma	Zhou et al., 2024, Tectonics
	Tectonics	47	Deformation and exhumation	180-170 Ma	Aouizerat et al., 2018, Geological Journal
	Sedimentary	48	Basin accumulation	133-101 Ma	Chen, 2016, Doctoral dissertation of Zhejiang University
