# Supplementary material for: High-elevation orogenic plateau influences ecosystems
Source: Research Square preprint supplement (doi:10.21203/rs.3.rs-5816615/v1), 2025-01-23
Supplement: Supplementary file 3 [file 6858c0c6be84407e6b62e633.xlsx]

## Sheet: Sheet1
Species	Strata and Time	Locations	Indicators or characteristics related to the environment	Reference
Jehol Biota (ca.135-110 Ma)
Dromaeosaurid Dinosaurs	Sihetun, Yixian Formation	Yanshan Mountains	Integumentary filaments or feathers	Xu et al., 1999, Nature
Dromaeosaurid Dinosaurs	Lower Cretaceous Yixian Formation	Yanshan Mountains	Filamentous integumental appendages, homologous with avian feathers	Xu et al., 2001, Nature
Nonavian Theropod	Lower Cretaceous Yixian Formation	Yanshan Mountains	Each feather comprises a single broad filament	Xu et al., 2009, Proceedings of the National Academy of Sciences
Tyrannosauroid	Lower Cretaceous Yixian Formation	Yanshan Mountains	Long filamentous feathers, feathered gigantic dinosaurs	Xu et al., 2012, Nature
Theropod Dinosaurs	Early Cretaceous strata	Yanshan Mountains	Filamentous feather-like structures over its entire body	Ji et al., 2001, Nature
Lamprey	Early Cretaceous strata	Yanshan Mountains	Pefer to live in freshwater of the cold and temporal zone or topographical highland	Chang et al., 2006, Nature
Stoneflies	Lower Cretaceous Yixian Formation	Yanshan Mountains	Different microclimate, mountains surrounding the lacustrine basins with cool climate that stonefly perfer to live in	Liu et al., 2008, Acta Geologica Sinica
Gymnosperm Xenoxylon	Lower Cretaceous Jiufotang Formation	Yanshan Mountains	Evergreen, akin to evergreen conifers	Xie et al., 2024, Cretaceous Research
Fossil woods	Lower Cretaceous strata	North and Northeast China	Anatomical features of cycadophytes, ginkgoales and coniferales; About 52 species of fossil woods have been reported and most of them belong to conifers except for one species of Ginkgoales and two species of cycadophytes	Yang et al., 2013, Palaeogeography, Palaeoclimatology, Palaeoecology
Fossil woods	Lower Cretaceous Yixian Formation	Yanshan Mountains	Coniferous wood specimens, a cool temperate, wet and seasonal climate	Ding et al., 2016, Cretaceous Research
Ice-rafting deposit	Quantou Formation	Songliao Basin	Vertically zoned, mountains surounding basin with high-latitude	Wang et al., 1996, Sedimentary Facies and Palaeogeography (In Chinese with English Abstract)
Ice-rafted dropstones	Yaojia Formation	Songliao Basin	Dropstone from Zhuangguangcai Range, significant topographic height difference	Gao et al., 2024, Cretaceous Research
Sporopollen			The palynoflora assemblage indicates a mixed survival of cold and warm palynomorphs
Carbon and oxygen isotope evidences			The carbon and oxygen isotope compositions of the synsedimentary calcareous clasts surrounding the dropstone exhibit obvious negative biases
Sporopollen	Bayingebi Formation of Lower Cretaceous strata	Yin'e Basin, North China	Abundant temperate coniferous forest vegetation; The mixed phenomenon of a few cold-loving molecular spores and pollen such as spruce, cedar and fir with tropical and subtropical spores and pollen suggest vertical zoning of plants, large elevation difference	Zhang et al., 2022, Sedimentary Geology
Ice-rafting deposites			Climatic cooling event or seasonal freezing
Isotopic evidence	Early Cretaceous time	Great Xing'an Range	Extremely negative δ18O values for hydrothermal zircon are attributed to addition of meteoric water with extremely low δ18O, mostly likely transported by glaciers in cold climate	Yang et al., 2013, Scientific Reports
Oxygen isotopes	Lower Cretaceous Yixian Formation	Northeast Asia	Apatite phosphate (δ18Op) from various reptile: cold local climatic conditions in northeast China	Amiot et al., 2011, Proceedings of the National Academy of Sciences
Isotopic evidence	Early Cretaceous time	Northeast Asia	The oxygen and carbon isotope compositions of apatite from Chinese reptiles (dinosaurs, crocodilians and turtles) indicate cool temperate climatic conditions	Amiot et al., 2015, Journal of Asian Earth Sciences
Sporopollen	135-130 Ma, Yushuxia section, Luanping Basin	Yanshan Mountains	Dominated by the cool- and temperate adapted bisaccate-producer Pinaceae and Taxodiaceae during deposition of the D-M2–3	Fang et al., 2022, Palaeogeography, Palaeoclimatology, Palaeoecology
Sporopollen	Lower Cretaceous Yixian Formation in Beipiao area	Yanshan Mountains	A very high percentage of the coniferous bisaccate pollen, adapted to a warm, generally dry climate but with seasonal rainfall	Li et al., 2007, Cretaceous Reserch
Yanliao Biota (ca.135-110 Ma)
Lampreys	Middle-Late Jurassic Tiaojishan Formation	Yanshan Mountains	Pefer to live in cold setting or topographical highland	Wu et al., 2023, Nature Communications; Guo et al., 2023, Communications Biology
Salamanders	Upper Jurassic Strata	Yanshan Mountains	Mountain Salamanders living in high paleoaltitude	Wang et al., 2004, Chinese Science Bulletin; Xu et al., 2016, Acta Geologica Sinica
Snakeflies	Jurassic Jiulongshan Formation Strata	Yanshan Mountains	Mountain insects living in high paleoaltitude	Engel and Ren, 2008, Journal of the Kansas Entomological Society; Xu et al., 2016, Acta Geologica Sinica
Insects	Jurassic Jiulongshan Formation Strata	Yanshan Mountains	Raphidioptera and Neuroptera living in high paleoaltitude	Ren, 2003, Doctural Disseration of Beijing Forestry University (In Chinese with English Abstract); Xu et al., 2016, Acta Geologica Sinica
Wood taxa	Jurassic Tiaojishan Formation Strata	Yanshan Mountains	Cool temperate, wet and seasonal climate condition	Tian et al., 2015, Science China: Earth Sciences
Insects	Middle-Upper Jurassic strata	Yanshan Mountains	Grylloblattodea, Raphidioptera (snakeflies), some Ephemeroptera, Plecoptera, Prophalangopsidae (grigs), and Osmylidae (giant lacewings), considered as alpine or boreal organisms	Guo et al., 2023, Communications Biology; Wang et al., 2019, Palaeogeography, Palaeoclimatology, Palaeoecology; Gao et al., 2020, Annual Review of Entomology
Insects	Middle-Upper Jurassic strata	Yanshan Mountains	Mesobaetis sibirica (Siphlonuridae), Shantous lacustris (Hexagenitidae) and Pronemoura sp. 1 (Pronemouridae), the most common aquatic insects in the Yanliao Fauna, are considered as montane taxa	Guo et al., 2023, Communications Biology; Wang et al., 2019, Palaeogeography, Palaeoclimatology, Palaeoecology
Sporopollen	Middle Jurassic Jiulongshan Formation at Daohugou village	Yanshan Mountains	Five types (mesic upland, mesic lowland, dry upland, dry lowland and waterside); A humid, warm climate to a hotter climate with seasonal drought	Na et al., 2014, Palynology
Insects	Middle Jurassic Jiulongshan Formation near Daohugou Village	Yanshan Mountains	Warm and humid	Selden et al., 2011, Biology
Leaves fossil	Middle Jurassic Zhaogou Formation	Yanshan Mountains	Three Ginkgo leaf types; Warm-temperate and moist climate	Sun et al., 2008, Int. J. Plant Sci.
Leaves fossil	Middle Jurassic Zhaogou Formation	Yanshan Mountains	Ginkgo leaf types;Palaeo-atmospheric CO2 concentration; Warm-temperate and moist climate	Sun et al., 2018, Palaeoword
