# Supplementary material for: High-elevation orogenic plateau influences ecosystems
Source: Research Square preprint supplement (doi:10.21203/rs.3.rs-5816615/v1), 2025-01-23
Supplement: Supplementary file 4 [file a0c9f950c4cccab3f9c30b2a.xlsx]

## Sheet: Taihangshan (THM)
CITATIONS	TECTONIC SETTING	LOCATION	LOCATION COMMENT	LATITUDE MIN	LATITUDE MAX	LONGITUDE MIN	LONGITUDE MAX	LAND OR SEA	ELEVATION MIN	ELEVATION MAX	SAMPLE NAME	ROCK NAME	MIN. AGE (YRS.)	MAX. AGE (YRS.)	GEOL.	AGE	ERUPTION DAY	ERUPTION MONTH	ERUPTION YEAR	ROCK TEXTURE	ROCK TYPE	DRILL DEPTH MIN	DRILL DEPTHAX	ALTERATION	MINERAL	MATERIAL	SIO2(WT%)	TIO2(WT%)	B2O3(WT%)	AL2O3(WT%)	CR2O3(WT%)	FE2O3(WT%)	FEO(WT%)	FEOT(WT%)	CAO(WT%)	MGO(WT%)	MNO(WT%)	NIO(WT%)	K2O(WT%)	NA2O(WT%)	P2O5(WT%)	H2O(WT%)	H2OP(WT%)	H2OM(WT%)	H2OT(WT%)	CO2(WT%)	CO1(WT%)	F(WT%)	CL(WT%)
Chen et al., 2002, Science In China		The Northern THM		39.2	39.4	115	115				WA-25					132											65.65	0.58		15.85			4.13		3.26	1.74	0.08		4.19	4.24	0.18
Chen et al., 2002, Science In China		The Northern THM		39.2	39.4	115	115				WA-7					132											67.29	0.49		16.2			3.24		2.53	1.1	0.06		3.7	4.69	0.2
Chen et al., 2002, Science In China		The Northern THM		39.2	39.4	115	115				WA-33					132											65.13	0.59		15.72			4.6		3.53	1.86	0.07		3.77	4.05	0.22
Chen et al., 2002, Science In China		The Northern THM		39.2	39.4	115	115				WA-35					132											59.16	0.56		18.47			5.45		4.47	1.81	0.08		4.59	4.3	0.34
Chen et al., 2002, Science In China		The Northern THM		39.2	39.4	115	115				WA-16					132											67.41	0.48		15.17			3.63		3.25	1.63	0.06		3.7	4.18	0.19
Chen et al., 2002, Science In China		The Northern THM		39.2	39.4	115	115				WA-14					132											64.62	0.61		15.88			4.64		4.03	2.24	0.07		3.75	3.98	0.19
Chen et al., 2002, Science In China		The Northern THM		39.2	39.4	115	115				WA-23					132											65.54	0.57		15.96			4.17		3.21	1.66	0.09		4.24	4.39	0.19
Chen et al., 2002, Science In China		The Northern THM		39.2	39.4	115	115				WA-28					132											74.2	0.33		13.5			1.84		0.5	0.34	0.03		5.42	3.97	0.05
Chen et al., 2009, Lithos		The Northern THM		39.1	39.3	114.8	114.8				CW-2	Enclave				129											58.63	0.7		15.36			6.65		5.52	4.17	0.16		3.39	4.43	0.26
Chen et al., 2009, Lithos		The Northern THM		39.1	39.3	114.8	114.8				CW-4	Enclave				129											55.79	0.95		14.31			7.76		6.48	6.31	0.19		3.36	3.73	0.31
Chen et al., 2009, Lithos		The Northern THM		39.1	39.3	114.8	114.8				CW-5	Enclave				129											58.67	0.96		14.76			6.31		4.68	4.75	0.13		4.77	3.77	0.5
Chen et al., 2009, Lithos		The Northern THM		39.1	39.3	114.8	114.8				CW-7	Enclave				129											54.62	1.02		18.08			7.75		5.61	3.28	0.16		1.02	5.49	0.31
Chen et al., 2009, Lithos		The Northern THM		39.1	39.3	114.8	114.8				CW-9	Enclave				129											56.49	0.79		18.16			7.75		6.28	2.82	0.11		2.59	4.63	0.39
Chen et al., 2009, Lithos		The Northern THM		39.1	39.3	114.8	114.8				CW-11	Enclave				129											56.38	1.02		15.47			6.58		5.5	4.6	0.18		3.47	4.75	0.67
Chen et al., 2009, Lithos		The Northern THM		39.1	39.3	114.8	114.8				CW-13	Enclave				129											62.45	0.84		15.71			4.97		3.86	2.77	0.08		4.29	4.09	0.4
Chen et al., 2009, Lithos		The Northern THM		39.1	39.3	114.8	114.8				CW-15	Enclave				129											52.3	0.99		18.37			8.72		7.35	4.21	0.14		2.34	4.21	0.43
Chen et al., 2009, Lithos		The Northern THM		39.1	39.3	114.8	114.8				CW-17	Enclave				129											55.12	0.87		14.8			8.15		6.59	5.57	0.22		1.51	5.04	0.45
Chen et al., 2009, Lithos		The Northern THM		39.3	39.3	114.8	114.9				LY-1	Enclave				129											57.52	1.19		16.97			7.14		4.69	3.23	0.12		2.7	5.3	0.62
Chen et al., 2009, Lithos		The Northern THM		39.3	39.3	114.8	114.9				LY-2	Enclave				129											57.19	0.97		16.45			7.35		5.63	4.29	0.18		2.23	5.08	0.3
Chen et al., 2009, Lithos		The Northern THM		39.4	39.5	114.9	115.1				BS-3	Enclave				129											61.95	0.67		17.36			5.37		4.28	1.91	0.08		3.12	4.01	0.33
Chen et al., 2009, Lithos		The Northern THM		39.4	39.5	114.9	115.1				BS-4	Enclave				129											64.32	0.6		16.29			4.81		3.56	1.77	0.08		3.34	3.88	0.31
Chen et al., 2009, Lithos		The Northern THM		39.7	39.8	115.1	115.3				DHN-3	Enclave				129											53.81	0.96		16.72			8.48		5.88	4.49	0.23		2.29	4.55	0.28
Chen et al., 2009, Lithos		The Northern THM		40.2	40.3	116	116				HL-1	Enclave				129											53.29	1.2		17.69			8.93		6.96	4.05	0.15		2.25	4.48	0.39
Chen et al., 2009, Lithos		The Northern THM		40.2	40.3	116	116				HL-5	Enclave				129											55.33	1.18		17.61			8.08		6.16	3.32	0.16		2.8	4.43	0.39
Chen et al., 2009, Lithos		The Northern THM		40.2	40.3	116	116				HL-7	Enclave				129											55.28	1.07		17.42			7.27		5.14	3.02	0.22		2.29	6.95	0.39
Chen et al., 2009, Lithos		The Northern THM		39.9	39.9	115.2	115.3				ZJG-1	Enclave				129											59.87	0.75		18.01			5.7		2.14	2.39	0.05		4.21	2.01	0.23
Chen et al., 2009, Lithos		The Northern THM		39.9	39.9	115.2	115.3				ZJG-3	Enclave				129											61.18	0.68		17.69			5.43		1.5	2.8	0.04		4.09	2.26	0.18
Chen et al., 2009, Lithos		The Northern THM		39.4	39.5	114.9	115.1				BS-2	Host rock				131											71.87	0.32		14.23			2.04		2.18	0.62	0.04		3.44	4.48	0.12
Chen et al., 2009, Lithos		The Northern THM		39.4	39.5	114.9	115.1				BS-5	Host rock				131											69.54	0.36		14.91			2.45		1.98	0.76	0.05		4.03	5.27	0.14
Chen et al., 2009, Lithos		The Northern THM		39.7	39.8	115.1	115.3				DHN-2	Host rock				131											66.53	0.44		16.21			3.41		3.2	1.12	0.06		3.79	3.93	0.15
Chen et al., 2009, Lithos		The Northern THM		40.2	40.3	116	116				HL-2	Host rock				131											60.08	0.8		17.07			6.28		4.43	2.4	0.1		3.64	4.13	0.31
Chen et al., 2009, Lithos		The Northern THM		40.2	40.3	116	116				HL-8	Host rock				131											63.3	0.81		16.9			4.73		2.93	1.38	0.11		4.18	4.66	0.28
Chu et al., 2021, Minerals		The Southern THM		36.7	36.8	114.3	114.4				ZKS002-8-1					129.3											60.92	0.58		16.38		3.93	2.18	5.71621	2.3	1.86	0.16		1.6	8.6	0.31
Chu et al., 2021, Minerals		The Southern THM		36.7	36.8	114.3	114.4				ZKS002-8-2					129.3											61.11	0.59		16.52		3.62	2.36	5.61728	1.98	1.75	0.15		1.78	8.7	0.3
Chu et al., 2021, Minerals		The Southern THM		36.7	36.8	114.3	114.4				ZKS002-11-1					130											64.88	0.26		18.16		1.53	0.87	2.24669	1.05	0.39	0.05		5.12	7.19	0.04
Chu et al., 2021, Minerals		The Southern THM		36.7	36.8	114.3	114.4				ZKS002-11-2					130											62.11	0.34		16.8		3.29	1.84	4.80034	1.68	1.05	0.12		5.11	6.74	0.19
Chu et al., 2021, Minerals		The Southern THM		36.7	36.8	114.3	114.4				ZKS002-14					130											64.84	0.26		18.08		1.42	0.76	2.03772	1	0.28	0.05		6.08	6.72	0.05
Chu et al., 2021, Minerals		The Southern THM		36.7	36.8	114.3	114.4				ZKS002-24-1					130											62.03	0.51		17.36		2.84	1.44	3.99543	2.29	0.93	0.1		5.46	6.02	0.24
Chu et al., 2021, Minerals		The Southern THM		36.7	36.8	114.3	114.4				ZKS002-24-2					130											61.81	0.54		17.13		3.22	1.55	4.44736	2.33	0.99	0.11		5.32	5.99	0.19
Chu et al., 2021, Minerals		The Southern THM		36.7	36.8	114.3	114.4				PM03-27-1					130											63.75	0.39		19.1		2.6	0.1	2.43948	0.48	0.15	0.02		5.26	7.07	0.07
Chu et al., 2021, Minerals		The Southern THM		36.7	36.8	114.3	114.4				PM03-23-1					130											63.9	0.34		18.91		2.44	0.18	2.37551	0.51	0.09	0.03		5.66	6.77	0.11
Chu et al., 2021, Minerals		The Southern THM		36.7	36.8	114.3	114.4				ZK32-1-1					130											58.53	0.54		16.43		3.3	2.15	5.11934	1.84	2.56	0.09		6.2	3.23	0.43
Chu et al., 2021, Minerals		The Southern THM		36.7	36.8	114.3	114.4				ZKN001-1					130											62.4	0.54		17.13		3.29	1.52	4.48034	0.73	1.05	0.04		6.1	5.82	0.21
Chu et al., 2021, Minerals		The Southern THM		36.7	36.8	114.3	114.4				ZKN001-2					130											63.23	0.51		17.04		2.43	1.06	3.24651	1.04	0.81	0.08		5.76	6.16	0.14
Chu et al., 2021, Minerals		The Southern THM		36.7	36.8	114.3	114.4				GY-3-1					130											56.15	0.77		15.26		3.94	3.08	6.62521	5.74	4.37	0.12		4.74	4.14	0.52
Chu et al., 2021, Minerals		The Southern THM		36.7	36.8	114.3	114.4				GY-3-2					130											56.1	0.73		14.25		4.81	3.05	7.37804	4.8	4.59	0.11		5.49	3.92	0.58
Chu et al., 2021, Minerals		The Southern THM		36.7	36.8	114.3	114.4				ZK3-3-1					124.8											57.75	0.7		15.76		3.58	3.62	6.84128	5.07	4.06	0.11		2.68	4.65	0.3
Chu et al., 2021, Minerals		The Southern THM		36.7	36.8	114.3	114.4				ZK3-3-2					124.8											57.5	0.71		15.6		3.4	3.65	6.70932	5.2	4.04	0.11		2.77	4.76	0.3
Chu et al., 2021, Minerals		The Southern THM		36.7	36.8	114.3	114.4				ZK3-6-1					124.1											48.98	1.03		14.46		4.98	5.82	10.301	8.36	7.84	0.15		1.44	3.89	0.4
Chu et al., 2021, Minerals		The Southern THM		36.7	36.8	114.3	114.4				ZK3-6-2					124.1											48.94	1.06		14.25		4.71	6.02	10.2581	8.59	8.16	0.16		1.5	3.68	0.41
Gao et al., 2012, Gondwana Research		The Northern THM		39.3	39.4	114.8	114.9				LWA-1					145.6											63.08	0.72		15.72				4.61597	3.23	1.96	0.1		4.17	4.41	0.24
Gao et al., 2012, Gondwana Research		The Northern THM		39.3	39.4	114.8	114.9				LWA-2					145.6											64.32	0.71		15.66				4.69696	2.88	1.72	0.08		4.14	4.6	0.25
Gao et al., 2012, Gondwana Research		The Northern THM		39.3	39.4	114.8	114.9				LMT-1					145.6											63.43	0.72		14.5				6.2896	3.49	2.09	0.15		2.73	3.7	0.27
Gao et al., 2012, Gondwana Research		The Northern THM		39.3	39.4	114.8	114.9				LMT-3					145.6											68.89	0.34		14.47				2.89736	2.07	1.31	0.06		3.33	4.08	0.19
Gao et al., 2012, Gondwana Research		The Northern THM		39.3	39.4	114.8	114.9				LMT-8					145.6											66.49	0.38		15.82				3.42824	1.66	1.57	0.1		4.14	4.31	0.21
Gao et al., 2012, Gondwana Research		The Northern THM		39.3	39.4	114.8	114.9				LMT-9					145.6											67.04	0.38		15.25				3.41924	1.66	1.84	0.09		3.69	4.66	0.2
Gao et al., 2012, Gondwana Research		The Northern THM		39.3	39.4	114.8	114.9				LMT-4					145.6											61.82	0.63		15.36				6.09165	3.12	3	0.1		3.17	3.79	0.28
Gao et al., 2012, Gondwana Research		The Northern THM		39.3	39.4	114.8	114.9				LWB-4					145.6											63.36	0.59		15.29				5.26383	2.91	2.15	0.17		3.04	4.35	0.33
Gao et al., 2012, Gondwana Research		The Northern THM		39.3	39.4	114.8	114.9				LMT-6					145.6											60.6	0.67		14.85				6.10964	4.31	3.4	0.13		2.87	3.96	0.31
Gao et al., 2012, Gondwana Research		The Northern THM		39.3	39.4	114.8	114.9				LMT-7					145.6											60.98	0.67		15				5.8397	4.89	2.95	0.12		2.95	3.79	0.31
Gao et al., 2012, Gondwana Research		The Northern THM		39.3	39.4	114.8	114.9				LWB-2					145.6											69.46	0.39		14.97				2.83437	1.14	1.61	0.05		3.64	3.85	0.15
Gao et al., 2012, Gondwana Research		The Northern THM		39.3	39.4	114.8	114.9				LWB-6					145.6											62.69	0.56		15.15				5.24583	3.68	3.02	0.14		2.77	4	0.35
Gao et al., 2012, Gondwana Research		The Northern THM		39.3	39.4	114.8	114.9				GJG-01					145.6											69.46	0.41		14.51				2.6904	0.88	1.22	0.04		4.72	4.5	0.09
Gao et al., 2012, Gondwana Research		The Northern THM		39.3	39.4	114.8	114.9				QJG-11					145.6											60.7	0.99		15.2				5.64175	5.25	2.73	0.12		3.13	3.64	0.32
Gao et al., 2012, Gondwana Research		The Northern THM		39.3	39.4	114.8	114.9				QJG-12					145.6											55.14	1.15		14.78				9.49289	4.61	4.58	0.21		2.37	4.07	0.42
Gao et al., 2012, Gondwana Research		The Northern THM		39.3	39.4	114.8	114.9				QJG-13					145.6											56	1.16		14.51				9.58287	4.79	4.31	0.21		2.39	3.68	0.41
Gao et al., 2012, Gondwana Research		The Northern THM		39.3	39.4	114.8	114.9				QJG-14					145.6											56.71	1.15		16.09				6.94646	6.61	3.48	0.15		1.88	3.38	0.41
Gao et al., 2012, Gondwana Research		The Northern THM		39.3	39.4	114.8	114.9				QJG-15					145.6											55.55	1.19		16.09				7.39636	7.4	3.32	0.2		1.86	3.7	0.4
Gao et al., 2012, Gondwana Research		The Northern THM		39.3	39.4	114.8	114.9				QJG-16					145.6											61.81	0.98		14.58				6.37058	4.86	2.74	0.08		3.08	3.53	0.36
Gao et al., 2012, Gondwana Research		The Northern THM		39.3	39.4	114.8	114.9				MSG-1					145.6											58.96	0.86		15.87				5.52477	4.79	3.63	0.06		3.35	4.3	0.44
Gao et al., 2012, Gondwana Research		The Northern THM		39.3	39.4	114.8	114.9				LYGJ-1					145.6											41.89	0.96		5.95				18.4999	7.16	20.75	0.33		0.69	0.94	0.18
Gao et al., 2012, Gondwana Research		The Northern THM		39.3	39.4	114.8	114.9				LYGJ-6					145.6											44.38	0.79		7.42				17.0062	7.06	17.31	0.28		1.17	1.47	0.2
Gao et al., 2012, Gondwana Research		The Northern THM		39.3	39.4	114.8	114.9				LYGJ-8					145.6											40.76	0.77		5.81				19.3907	6.11	21.7	0.32		0.74	1.04	0.15
Gao et al., 2012, Gondwana Research		The Northern THM		39.3	39.4	114.8	114.9				LYGJ-4					145.6											40.37	1.25		6.64				18.8328	7.61	19.86	0.34		0.51	0.99	0.1
Gao et al., 2013, JAES		The Northern THM		39.3	39.4	114.8	114.9				MJC-4					142.7											67.14	0.43		16.47		2.87	0.48	3.06243	1.25	0.66	0.056		4.07	3.72	0.16
Gao et al., 2013, JAES		The Northern THM		39.3	39.4	114.8	114.9				MJC-6					142.7											58.46	0.44		16.39		2.66	1.62	4.01347	5.25	1.87	0.062		3.15	3.6	0.24
Gao et al., 2013, JAES		The Northern THM		39.3	39.4	114.8	114.9				MJC-8					142.7											56.7	0.45		17.67		2.37	1.73	3.86253	4.47	2.15	0.073		3.18	4.24	0.23
Gao et al., 2013, JAES		The Northern THM		39.3	39.4	114.8	114.9				MJC-9					142.7											60.65	0.42		16.42		2.64	1.58	3.95547	3.98	1.95	0.071		2.82	3.87	0.22
Gao et al., 2013, JAES		The Northern THM		39.3	39.4	114.8	114.9				MJC-12					142.7											57.24	0.56		16.89		2.67	2.02	4.42247	4.37	3.11	0.074		3.09	4.94	0.28
Gao et al., 2013, JAES		The Northern THM		39.3	39.4	114.8	114.9				MJC-13					142.7											56.03	0.59		17.05		2.9	2.12	4.72942	5.34	3.11	0.092		3.46	3.56	0.29
Gao et al., 2013, JAES		The Northern THM		39.3	39.4	114.8	114.9				MJC-14					142.7											56.78	0.57		16.91		2.69	1.82	4.24046	4.11	2.97	0.07		3.24	5.36	0.29
Gao et al., 2013, JAES		The Northern THM		39.3	39.4	114.8	114.9				MSG-2					142.7											58.54	0.54		16.4		2.71	1.81	4.24846	3.81	2.79	0.069		3.11	5.07	0.26
Gao et al., 2013, JAES		The Northern THM		39.3	39.4	114.8	114.9				MSG-5					142.7											60.65	0.6		17.75		3.92	1.19	4.71722	2.23	3.11	0.086		3.6	3.51	0.28
Gao et al., 2013, JAES		The Northern THM		39.3	39.4	114.8	114.9				MSG-6					142.7											57.73	0.52		16.76		3.15	1.35	4.18437	3.7	2.63	0.076		3.17	4.49	0.29
Gao et al., 2013, JAES		The Northern THM		39.3	39.4	114.8	114.9				MSG-7					142.7											60.39	0.57		16.89		3.63	1.35	4.61627	2.71	2.86	0.086		3.43	3.52	0.29
Gao et al., 2013, JAES		The Northern THM		39.3	39.4	114.8	114.9				QZZ-5					142.7											58.93	0.66		17.47		2.73	2.23	4.68645	4.2	2.89	0.081		3.03	5.6	0.35
Gao et al., 2013, JAES		The Northern THM		39.3	39.4	114.8	114.9				QZZ-6					142.7											60.42	0.61		16.95		3.02	2.19	4.9074	4.54	2.89	0.076		3	4.57	0.32
Gao et al., 2013, JAES		The Northern THM		39.3	39.4	114.8	114.9				HMT-14					142.7											64.57	0.61		16.2		2.27	2.6	4.64255	1.98	1.53	0.11		4.03	3.46	0.31
Gao et al., 2013, JAES		The Northern THM		39.3	39.4	114.8	114.9				HMT-28					142.7											63.44	0.49		15.16		2.39	2.15	4.30052	2.83	2.5	0.033		4.27	4.37	0.27
Gao et al., 2013, JAES		The Northern THM		39.3	39.4	114.8	114.9				HMT-34					142.7											61.6	0.53		15.7		1.86	2.7	4.37363	5.34	1.9	0.087		3.37	4.11	0.24
Gao et al., 2013, JAES		The Northern THM		39.3	39.4	114.8	114.9				HMT-35					142.7											67.44	0.4		14.5		1.68	2.6	4.11166	2.51	1.68	0.07		2.85	3.95	0.19
Gao et al., 2013, JAES		The Northern THM		39.3	39.4	114.8	114.9				HMT-38					142.7											65.58	0.48		15.77		2.26	1.85	3.88355	2.76	1.67	0.053		3.66	2.95	0.25
Gao et al., 2013, JAES		The Northern THM		39.3	39.4	114.8	114.9				HMT-39					142.7											69.59	0.45		13.44		3.52	0.6	3.7673	1.38	2.15	0.081		2.21	2.34	0.2
Gao et al., 2013, JAES		The Northern THM		39.3	39.4	114.8	114.9				HMT-37					142.7											69.34	0.44		14.07		3.11	0.85	3.64838	1.47	2.12	0.055		2.49	2.98	0.21
He et al., 2014, JAES		The Northern THM		38.8	38.8	114.1	114.1				CW1/1					129.67											68.03	0.46		15.37				2.78038	2.37	1.29	0.04		3.88	4.7	0.19
He et al., 2014, JAES		The Northern THM		38.8	38.8	114.1	114.1				CW1/2					130											66.55	0.53		15.01				4.0311	2.22	1.71	0.06		3.32	4.51	0.22
He et al., 2014, JAES		The Northern THM		38.7	38.7	114	114				MP1/1					128											63.75	0.67		16.09				4.70595	3.1	2.34	0.07		3.51	4.71	0.27
He et al., 2014, JAES		The Northern THM		38.8	38.8	114.1	114.1				CW3/1					128.2											56.68	0.75		16.19				6.40658	5.33	3.69	0.11		2.75	3.88	0.25
Hou et al., 2015, Economic Geology		The Northern THM		39.35	39.35	115.12	115.12				LYLM-12	Gabbro				132											47.45	1.25		18.79				6.2986	10.91	7.45	0.08		0.97	2.78	0.1
Hou et al., 2015, Economic Geology		The Northern THM		39.35	39.35	115.12	115.12				LYLM-1	Gabbronorite				132											53.43	1.08		16.72				7.76527	7.75	5.69	0.11		1.8	3.55	0.304
Hou et al., 2015, Economic Geology		The Northern THM		39.35	39.35	115.12	115.12				LYLM-3	Gabbronorite				132											52.87	1.2		16.22				7.92724	7.8	5.49	0.12		2.03	3.79	0.47
Hou et al., 2015, Economic Geology		The Northern THM		39.35	39.35	115.12	115.12				LYLM-4	Gabbronorite				132											53.74	1.2		16.2				8.01722	7.79	5.71	0.12		2.07	3.52	0.527
Hou et al., 2015, Economic Geology		The Northern THM		39.35	39.35	115.12	115.12				LYLM-5	Gabbronorite				132											53.45	1.19		16.38				8.04421	7.61	5.76	0.12		2	3.79	0.45
Hou et al., 2015, Economic Geology		The Northern THM		39.35	39.35	115.12	115.12				LYLM-6	Gabbronorite				132											53.45	1.16		16.2				8.07121	7.79	5.7	0.12		2.08	3.48	0.479
Hou et al., 2015, Economic Geology		The Northern THM		39.35	39.35	115.12	115.12				LYLM-11	Gabbronorite				132											54.05	1.06		16.41				7.6573	7.21	4.9	0.11		1.54	4.66	0.38
Hou et al., 2015, Economic Geology		The Northern THM		39.5	39.5	115	115				YGS-8	Gabbronorite				132											54.21	1.08		16.45				8.46712	6.85	3.87	0.14		2.61	3.85	0.54
Hou et al., 2015, Economic Geology		The Northern THM		39.3	39.4	114.8	114.9				2013-6-48	Quartz-diorite				143											64.89	0.45		15.51				3.86914	1.69	1.91	0.11		2.71	3.67	0.25
Hou et al., 2015, Economic Geology		The Northern THM		39.3	39.4	114.8	114.9				MJC-03	Quartz-diorite				143											63.54	0.44		15.85				3.35625	2.8	1.62	0.05		3.47	3.78	0.24
Hou et al., 2015, Economic Geology		The Northern THM		39.3	39.4	114.8	114.9				MJC-04	Quartz-diorite				143											63.65	0.44		15.81				3.29327	2.7	1.54	0.05		3.55	3.88	0.23
Hou et al., 2015, Economic Geology		The Northern THM		39.3	39.4	114.8	114.9				MJC-10	Quartz-diorite				143											64.04	0.44		15.67				3.20329	3.16	1.76	0.06		3.32	3.9	0.24
Hou et al., 2015, Economic Geology		The Northern THM		39.3	39.4	114.8	114.9				MJC-11	Quartz-diorite				143											64.21	0.43		15.73				3.23928	2.97	1.63	0.06		3.29	3.87	0.23
Hou et al., 2015, Economic Geology		The Northern THM		39.4	39.4	114.9	114.9				2013-6-68	Andesite-dacite				146											58.45	0.8		16.95				6.51455	5.56	2.8	0.11		2.33	3.72	0.29
Hou et al., 2015, Economic Geology		The Northern THM		39.4	39.4	114.9	114.9				2013-6-69	Andesite-dacite				146											54.56	1.03		16.18				7.00944	5.63	5.09	0.12		2.4	3.72	0.39
Hou et al., 2015, Economic Geology		The Northern THM		39.4	39.4	114.9	114.9				2013-6-70	Andesite-dacite				146											54.57	1.02		16.24				7.05443	5.55	5.06	0.11		2.45	3.78	0.38
Hou et al., 2015, Economic Geology		The Northern THM		39.4	39.4	114.9	114.9				2013-6-71	Andesite-dacite				146											55.28	1.07		17.2				6.7305	6.03	2.89	0.1		2.54	4.72	0.46
Hou et al., 2015, Economic Geology		The Northern THM		39.4	39.4	114.9	114.9				2013-6-72	Andesite-dacite				146											54.15	1.02		15.68				7.25239	6.86	5.2	0.13		2.12	3.55	0.36
Hou et al., 2015, Economic Geology		The Northern THM		39.4	39.4	114.9	114.9				2013-6-73	Andesite-dacite				146											53.48	1.09		16.41				7.56732	6.29	5.3	0.12		2	3.56	0.4
Hou et al., 2015, Economic Geology		The Northern THM		39.4	39.4	114.9	114.9				2013-6-74	Andesite-dacite				146											54.35	1.03		16.22				7.07243	5.74	5.08	0.12		2.12	3.73	0.39
Liu et al., 2009, Earth Science		The Northern THM		39.4	39.4	115.16	115.16				ZJ016					138											48.71	0.5		4.83		9.67			14.87	19.46	0.15		0.31	0.93	0.05
Liu et al., 2009, Earth Science		The Northern THM		39.4	39.4	115.16	115.16				ZJ018					138											47.19	0.47		5.79		11.83			8.44	22.18	0.16		0.71	1.37	0.1
Liu et al., 2009, Earth Science		The Northern THM		39.4	39.4	115.16	115.16				ZJ006					138											54.14	1.14		15.95		8.22			7.9	6.47	0.12		1.89	3.72	0.34
Liu et al., 2009, Earth Science		The Northern THM		39.4	39.4	115.16	115.16				ZJ003					138											54.45	1.16		15.52		8.37			7.74	6.52	0.12		1.94	3.66	0.42
Liu et al., 2009, Earth Science		The Northern THM		39.4	39.4	115.16	115.16				ZJ005					138											54.22	1.2		16.32		8.14			7.62	5.76	0.12		2.12	3.83	0.46
Liu et al., 2009, Earth Science		The Northern THM		39.4	39.4	115.16	115.16				ZJ007					138											52.55	1.18		15.78		8.91			8.11	7.13	0.12		1.51	3.62	0.42
Liu et al., 2009, Earth Science		The Northern THM		39.4	39.4	115.16	115.16				ZJ024					138											54.23	1.23		16.1		8.37			7.64	5.88	0.12		2.18	3.78	0.44
Liu et al., 2009, Earth Science		The Northern THM		39.4	39.4	115.16	115.16				ZJ025					138											53.75	1.12		15.94		8.56			8.18	6.61	0.13		1.69	3.77	0.39
Liu et al., 2009, Earth Science		The Northern THM		39.4	39.4	115.16	115.16				ZJ009					138											47.88	1.63		19.23		6.54			11.28	7.43	0.08		1.08	2.93	0.1
Liu et al., 2009, Earth Science		The Northern THM		39.4	39.4	115.16	115.16				ZJ013					138											48.48	2.26		15.07		8.6			9.14	9.86	0.09		1.67	2.96	0.1
Liu et al., 2009, Earth Science		The Northern THM		39.4	39.4	115.16	115.16				ZJ014					138											49.29	1.49		18.46		7.09			8.4	7.61	0.07		1.48	3.78	0.09
Liu et al., 2009, Earth Science		The Northern THM		39.4	39.4	115.16	115.16				ZJ015					138											47.2	1.65		18.17		7.23			10.13	9.61	0.08		1.34	2.8	0.06
Liu et al., 2009, Earth Science		The Northern THM		39.4	39.4	115.16	115.16				ZJ020					138											45.72	0.31		7.6		12.86			9.86	19.93	0.16		0.46	1.25	0.06
Liu et al., 2009, Earth Science		The Northern THM		39.4	39.4	115.16	115.16				ZJ022					138											46.82	0.6		7.01		13.1			6.17	22.53	0.16		0.86	1.63	0.11
Liu et al., 2009, Earth Science		The Northern THM		39.4	39.4	115.16	115.16				ZJ012					138											47	0.47		5.94		12.52			7.94	21.91	0.15		0.73	1.46	0.1
Liu et al., 2009, Earth Science		The Northern THM		39.4	39.4	115.16	115.16				ZJ017					138											47.86	0.44		5.34		11.43			9.49	22.72	0.15		0.56	1.07	0.09
Liu et al., 2009, Earth Science		The Northern THM		39.4	39.4	115.16	115.16				ZJ019					138											45.71	0.56		8.37		14			7.09	20.96	0.17		0.65	1.52	0.1
Liu et al., 2010, JAES		The Northern THM		39.4	39.4	115.16	115.16				ZJ004					138											54.56	1.15		15.7				7.54932	7.68	6.47	0.12		1.89	3.63	0.33
Liu et al., 2010, JAES		The Northern THM		39.4	39.4	115.16	115.16				ZJ026					138											53.42	1.18		14.98				8.1072	8.3	7.35	0.13		1.52	3.44	0.29
Liu et al., 2010, JAES		The Northern THM		39.4	39.4	115.16	115.16				ZJ008					138											51.24	0.7		7.22				7.34237	14.17	15.07	0.13		0.78	1.5	0.08
Liu et al., 2010, JAES		The Northern THM		39.4	39.4	115.16	115.16				ZJ010					138											47.35	0.33		5.04				9.78982	9.27	23.57	0.15		0.55	1.25	0.07
Sun et al., 2015, JAES		The Southern THM		36.75	36.79	114.38	114.43				HS02-H1a	Syenite				134.5											57.6	0.72		15.01		3.34	3.52	6.52533	5.54	3.12	0.1		5.68	4.08	0.48
Sun et al., 2015, JAES		The Southern THM		36.75	36.79	114.38	114.43				HS02-H2a	Syenite				134.5											56.57	0.74		14.4		2.85	4.37	6.93443	5.4	4.83	0.13		4.99	4.23	0.57
Sun et al., 2015, JAES		The Southern THM		36.75	36.79	114.38	114.43				HS04-H1a	Syenite				134.5											61.17	0.55		17.08		3.6	0.98	4.21928	2.41	1.09	0.09		6.09	5.61	0.25
Sun et al., 2015, JAES		The Southern THM		36.75	36.79	114.38	114.43				HS04-H2a	Syenite				134.5											68.16	0.36		16.34		1.75	0.27	1.84465	0.47	0.39	0.01		5.42	5.93	0.09
Sun et al., 2015, JAES		The Southern THM		36.75	36.79	114.38	114.43				HS04-H3a	Syenite				134.5											63.46	0.43		16.96		2.83	0.8	3.34643	1.52	0.86	0.08		5.62	6.43	0.19
Sun et al., 2015, JAES		The Southern THM		36.75	36.79	114.38	114.43				HS05-H1a	Syenite				134.5											64.31	0.4		18.14		2.4	0.3	2.45952	0.28	0.21	0.02		7.1	5.95	0.08
Sun et al., 2015, JAES		The Southern THM		36.75	36.79	114.38	114.43				HS05-H2a	Syenite				134.5											63.25	0.3		17.93		2.51	0.63	2.8885	1.03	0.44	0.09		6.38	6.53	0.11
Sun et al., 2015, JAES		The Southern THM		36.75	36.79	114.38	114.43				HS08-Ha	Syenite				134.5											62.84	0.5		17.14		3.29	0.82	3.78034	1.72	0.75	0.11		5.12	6.77	0.18
Sun et al., 2015, JAES		The Southern THM		36.75	36.79	114.38	114.43				HS09-Ha	Syenite				134.5											61.64	0.5		17.44		3.75	0.82	4.19425	2.07	0.74	0.08		5.67	6.32	0.22
Sun et al., 2015, JAES		The Southern THM		36.75	36.79	114.38	114.43				HS1257-Ha	Syenite				134.5											62.78	0.4		17.8		3.29	0.83	3.79034	1.38	0.52	0.07		5.79	6.19707	0.15
Sun et al., 2015, JAES		The Southern THM		36.75	36.79	114.38	114.43				HS1279-Ha	Syenite				134.5											62.92	0.31		17.78		2.24	0.65	2.66555	1.41	0.49	0.08		6.51	6.53864	0.09
Sun et al., 2015, JAES		The Southern THM		36.81	36.86	114.13	114.18				XSM04-H	Monzonite				133.7											58.92	0.65		16.57		4.36	2.1	6.02313	5.06	2.11	0.11		3.88	4.8	0.38
Sun et al., 2015, JAES		The Southern THM		36.81	36.86	114.13	114.18				XSM05-H	Monzonite				133.7											61.65	0.45		17.99		3.28	1.3	4.25134	2.93	1.16	0.05		4.5	5.33	0.21
Sun et al., 2015, JAES		The Southern THM		36.81	36.86	114.13	114.18				KSC06-H	Diorite				133.7											61.53	0.57		17.04		3.42	1.43	4.50732	3.76	1.52	0.05		4.43	4.94	0.28
Sun et al., 2015, JAES		The Southern THM		36.81	36.86	114.13	114.18				KSC08-H1	Diorite				133.7											60.83	0.6		17.5		4.41	1.62	5.58812	2.75	1.74	0.05		0.83	8.1	0.31
Sun et al., 2015, JAES		The Southern THM		36.81	36.86	114.13	114.18				KSC08-H2	Diorite				133.7											61.02	0.6		17.25		3.41	2.28	5.34832	4.58	1.92	0.08		2.62	4.63	0.28
Sun et al., 2015, JAES		The Southern THM		36.81	36.86	114.13	114.18				BLS09-H	Monzonite				133.7											60.59	0.6		17.17		3.42	2.12	5.19732	2.53	2.2	0.07		3.77	5.82	0.27
Sun et al., 2015, JAES		The Southern THM		36.82	36.82	114.1	114.1				KSC10-H	Diorite				133.7											63.84	0.45		16.14		2.52	0.87	3.1375	2.46	1.01	0.11		5.6	5.93	0.19
Sun et al., 2015, JAES		The Southern THM		36.81	36.86	114.13	114.18				XSM1248-H	Diorite				133.7											62.65	0.4		18		1.44	0.78	2.07571	4.47	1.39	0.05		0.44	8.52	0.24
Sun et al., 2015, JAES		The Southern THM		36.81	36.86	114.13	114.18				XSM1249-H	Monzonite				133.7											62.48	0.41		17.81		1.98	1.05	2.8316	3.6	1.45	0.05		2.58	7.27	0.21
Sun et al., 2015, JAES		The Southern THM		36.81	36.86	114.13	114.18				DZP1250-H	Monzonite				133.7											59.07	0.41		18.18		3.47	1	4.12231	3.56	1.3	0.07		4.85	5.85	0.27
Sun et al., 2015, JAES		The Southern THM		36.81	36.86	114.13	114.18				DZP1251-H	Monzonite				133.7											62.11	0.5		17.33		1.22	1.08	2.17776	4.34	1.8	0.13		0.76	8.81	0.24
Sun et al., 2019, Lithos		The Southern THM		36.6	36.7	114	114.1				WA1232-H		129	134		131.5											62.19	0.43		15.91				3.92133	4.1	2.64	0.07		2.19	4.97	0.18
Sun et al., 2019, Lithos		The Southern THM		36.6	36.7	114	114.1				WA1233-H		129	134		131.5											55.2	0.56		13.85				6.14923	6.26	8.45	0.1		1.9	3.53	0.23
Sun et al., 2019, Lithos		The Southern THM		36.6	36.7	114	114.1				WA1271-H		129	134		131.5											59.22	0.5		16.35				4.9471	5.48	3.8	0.1		2.59	4.53	0.24
Sun et al., 2019, Lithos		The Southern THM		36.6	36.7	114	114.1				WA1273-H		129	134		131.5											60.04	0.54		17.64				4.70955	5.57	1.75	0.07		2.34	4.96	0.25
Sun et al., 2019, Lithos		The Southern THM		36.6	36.7	114	114.1				WA1277-H		129	134		131.5											56.98	0.53		17.07				5.70293	6.65	3.73	0.11		1.95	4.3	0.22
Sun et al., 2019, Lithos		The Southern THM		36.3	36.3	114.14	114.14				XMZ-ZK02-11		129	134		131.5											59.2695	0.448548		14.0125				4.9174	4.34698	5.12461	0.0548338		0.605393	5.96257	0.384262
Sun et al., 2019, Lithos		The Southern THM		36.3	36.3	114.14	114.14				XMZ-ZK02-13		129	134		131.5											62.5808	0.391848		15.9578				4.04877	3.682	2.27419	0.0691884		2.75911	4.97585	0.361021
Sun et al., 2019, Lithos		The Southern THM		36.3	36.3	114.14	114.14				XMZ-ZK02-24		129	134		131.5											56.4897	0.535903		13.9458				6.17335	5.97258	7.07267	0.0900924		2.15964	4.27353	0.46737
Sun et al., 2019, Lithos		The Southern THM		36.3	36.3	114.14	114.14				XMZ-ZK02-26		129	134		131.5											53.0268	0.576144		13.9964				7.23219	6.08456	8.90947	0.100791		1.69469	4.00638	0.460888
Sun et al., 2019, Lithos		The Southern THM		36.3	36.3	114.14	114.14				XMZ-ZK02-31		129	134		131.5											51.9791	0.741133		16.4605				8.22655	6.12263	4.08137	0.0694458		2.3389	5.0528	0.674797
Sun et al., 2019, Lithos		The Southern THM		36.3	36.3	114.14	114.14				XMZ-ZK02-33		129	134		131.5											52.665	0.654023		15.6577				7.6182	6.31763	4.76091	0.0724592		0.922917	6.03895	0.597749
Sun et al., 2019, Lithos		The Southern THM		36.3	36.3	114.14	114.14				XMZ-ZK02-35		129	134		131.5											55.7297	0.591917		15.636				6.80754	5.22899	4.66168	0.0887482		0.696485	7.02388	0.582941
Sun et al., 2019, Lithos		The Southern THM		36.2	36.8	114	114.1				XMC01-H		129	134		131.5											50.68	0.894		12.38				9.40291	8.06	10.93	0.163		2.06	2.78	0.427
Sun et al., 2019, Lithos		The Southern THM		36.2	36.8	114	114.1				XMC02-H		129	134		131.5											52.06	0.682		11.34				8.62008	6.76	12.74	0.163		2.37	2.46	0.353
Sun et al., 2019, Lithos		The Southern THM		36.2	36.8	114	114.1				XMC03-H		129	134		131.5											50.29	0.855		11.62				9.78083	7.67	11.81	0.169		2.39	2.37	0.403
Sun et al., 2019, Lithos		The Southern THM		36.8	36.8	114.14	114.14				BLS-ZK01-1		129	134		131.5											52.2966	0.901196		16.4972				8.43438	6.32832	4.05343	0.100651		2.79179	4.63321	0.827838
Sun et al., 2019, Lithos		The Southern THM		36.8	36.8	114.14	114.14				BLS-ZK01-2		129	134		131.5											51.7834	0.897521		17.1748				8.61869	6.25497	4.08048	0.115934		0.860903	6.3162	0.818457
Sun et al., 2019, Lithos		The Southern THM		36.8	36.8	114.14	114.14				BLS-ZK01-3		129	134		131.5											51.4151	0.805109		17.2216				9.34643	5.48349	3.3577	0.0763488		2.32254	5.37277	0.814979
Sun et al., 2019, Lithos		The Southern THM		36.8	36.8	114.14	114.14				BLS-ZK01-4		129	134		131.5											57.3239	0.643166		17.058				6.48245	4.63891	2.48773	0.055515		3.35274	5.49727	0.643019
Sun et al., 2019, Lithos		The Southern THM		36.8	36.8	114.14	114.14				BLS-ZK01-5		129	134		131.5											58.9526	0.649887		16.7393				5.54481	4.24006	2.11362	0.079396		3.22847	5.49096	0.61103
Sun et al., 2019, Lithos		The Southern THM		36.8	36.8	114.14	114.14				BLS-ZK01-6		129	134		131.5											59.2016	0.602652		17.0726				5.22544	3.7331	2.02218	0.0765724		3.33129	5.73681	0.590266
Sun et al., 2019, Lithos		The Southern THM		36.8	36.8	114.14	114.14				BLS-ZK01-7		129	134		131.5											58.1781	0.587396		17.4297				4.76589	3.04978	2.17045	0.0498652		3.26448	7.73204	0.573033
Sun et al., 2019, Lithos		The Southern THM		36.8	36.8	114.14	114.14				BLS-ZK01-8		129	134		131.5											59.0004	0.591663		17.2467				5.42919	3.21769	2.29998	0.0627014		3.60872	6.06698	0.575615
Sun et al., 2019, Lithos		The Southern THM		36.8	36.8	114.14	114.14				BLS-ZK01-11		129	134		131.5											55.5087	0.615041		17.3001				6.38105	5.39949	1.70325	0.0862756		1.02167	7.61821	0.90557
Sun et al., 2019, Lithos		The Southern THM		36.8	36.8	114.14	114.14				BLS-ZK01-12		129	134		131.5											57.3817	0.576125		17.5921				4.5252	4.86145	1.75581	0.0776436		1.03577	7.97047	0.824096
Sun et al., 2019, Lithos		The Southern THM		36.8	36.8	114.14	114.14				BLS-ZK01-13		129	134		131.5											57.2222	0.596946		17.3732				5.31536	5.238	2.17996	0.0849106		1.61736	7.28762	0.852185
Sun et al., 2019, Lithos		The Southern THM		36.8	36.8	114.14	114.14				BLS-ZK01-14		129	134		131.5											56.3027	0.607014		17.5081				5.13435	5.79853	2.01853	0.106969		0.730986	7.66239	0.880379
Sun et al., 2019, Lithos		The Southern THM		36.8	36.8	114.14	114.14				BLS-ZK01-15		129	134		131.5											54.5367	0.635477		17.1122				6.37031	4.00155	3.92196	0.184514		1.04797	7.35379	1.06573
Sun et al., 2019, Lithos		The Southern THM		36.8	36.8	114.14	114.14				BLS-ZK01-17		129	134		131.5											55.5447	0.589859		17.7776				5.62269	2.35324	3.94021	0.14176		1.08883	8.00098	0.876163
Sun et al., 2019, Lithos		The Southern THM		36.8	36.8	114.14	114.14				BLS-ZK01-18		129	134		131.5											56.527	0.626603		17.4394				5.07425	1.88267	4.93969	0.106805		0.71315	8.25378	0.779564
Sun et al., 2019, Lithos		The Southern THM		36.8	36.8	114.14	114.14				BLS-ZK01-19		129	134		131.5											59.2765	0.408063		18.0336				2.6273	2.25685	2.95522	0.0385162		1.26746	8.80208	0.498463
Sun et al., 2019, Lithos		The Southern THM		36.8	36.8	114.14	114.14				BLS-ZK01-20		129	134		131.5											58.6077	0.423103		18.1079				3.92097	3.13775	2.28996	0.0471352		4.91148	5.40917	0.566446
Sun et al., 2019, Lithos		The Southern THM		36.8	36.8	114.14	114.14				BLS-ZK01-21		129	134		131.5											57.0107	0.476664		17.6161				5.20721	2.96147	2.54636	0.0702882		4.45858	5.55908	0.606919
Sun et al., 2019, Lithos		The Southern THM		36.8	36.8	114.14	114.14				BLS-ZK01-22		129	134		131.5											55.4743	0.504178		18.15				6.45304	3.4135	2.08383	0.0597192		4.56289	4.67698	0.879273
Sun et al., 2019, Lithos		The Southern THM		36.8	36.8	114.14	114.14				BLS-ZK01-23		129	134		131.5											57.5741	0.505794		18.4748				5.03958	2.81361	1.92005	0.0601456		1.1327	8.4698	0.823147
Wang et al., 2006, Lithos		The Southern THM		35.7	35.8	114.1	114.1				20HD 47	Gabbro				125											53.37	0.57		13.37		3	5.4	8.0994	7.79	9.09	0.16		1.96	2.96	0.26
Wang et al., 2006, Lithos		The Southern THM		35.7	35.8	114.1	114.1				20HD 40	Gabbro				125											53.49	0.59		13.48		2.89	5.47	8.07042	7.74	9.02	0.16		1.99	2.97	0.26
Wang et al., 2006, Lithos		The Southern THM		35.7	35.8	114.1	114.1				20HD 42	Gabbro				125											53.7	0.59		13.22		3	5.33	8.0294	7.98	8.9	0.15		1.9	3.07	0.26
Wang et al., 2006, Lithos		The Southern THM		35.7	35.8	114.1	114.1				20HD 46	Gabbro				125											53.77	0.6		13.3		3.06	5.23	7.98339	7.69	8.86	0.15		1.98	3	0.26
Wang et al., 2006, Lithos		The Southern THM		35.7	35.8	114.1	114.1				20HD 45	Gabbro				125											53.82	0.58		13.42		3	5.27	7.9694	7.8	8.83	0.15		2.03	3.04	0.26
Wang et al., 2006, Lithos		The Southern THM		35.7	35.8	114.1	114.1				20HD 50	Gabbro				125											53.89	0.59		13.68		2.64	5.3	7.67547	7.4	9.44	0.15		1.94	3.12	0.26
Wang et al., 2006, Lithos		The Southern THM		35.7	35.8	114.1	114.1				20HD 41	Gabbro				125											53.92	0.57		13.36		2.72	5.33	7.77746	7.57	8.94	0.15		1.98	3.08	0.25
Wang et al., 2006, Lithos		The Southern THM		35.7	35.8	114.1	114.1				20HD 43	Gabbro				125											54.19	0.57		13.42		2.85	5.1	7.66443	7.56	8.87	0.14		2.16	2.98	0.26
Wang et al., 2006, Lithos		The Southern THM		35.7	35.8	114.1	114.1				20HD 51	Gabbro				125											54.7	0.59		13.59		2.39	5.33	7.48052	7.03	9.01	0.14		2.27	3.22	0.27
Wang et al., 2006, Lithos		The Southern THM		35.7	35.8	114.1	114.1				20HD 79	Gabbro				125											52.06	0.61		12.3		4	5.45	9.0492	9.1	10.69	0.16		0.77	3.55	0.18
Wang et al., 2006, Lithos		The Southern THM		35.7	35.8	114.1	114.1				20HD 78	Gabbro				125											52.32	0.6		12.58		3.53	5.5	8.67629	9.2	10.38	0.15		0.97	3.55	0.2
Wang et al., 2006, Lithos		The Southern THM		35.7	35.8	114.1	114.1				20HD 8	Gabbro				125											53.28	0.61		13.32		4.16	4.54	8.28317	8.13	9.81	0.14		1.06	3.74	0.18
Wang et al., 2006, Lithos		The Southern THM		35.7	35.8	114.1	114.1				20HD 70	Gabbro				125											54.4	0.59		13.57		3.01	5.06	7.7684	7.3	9.01	0.16		1.54	3.84	0.3
Wang et al., 2006, Lithos		The Southern THM		35.7	35.8	114.1	114.1				DG1	Gabbro				125											52.92	0.56		13.31		4.42	3.79	7.76712	7.9	9.78	0.12		1.89	2.37	0.24
Wang et al., 2006, Lithos		The Southern THM		35.7	35.8	114.1	114.1				DG2	Gabbro				125											52.25	0.61		12.93		4.6	4.21	8.34908	7.92	10.81	0.12		1.86	2.53	0.22
Wang et al., 2006, Lithos		The Southern THM		35.7	35.8	114.1	114.1				DG3	Gabbro				125											52.98	0.58		13.27		4.59	3.87	8.00008	7.86	9.8	0.12		1.83	2.49	0.24
Wang et al., 2006, Lithos		The Southern THM		35.7	35.8	114.1	114.1				DG4	Gabbro				125											52.48	0.59		13.13		4.34	3.96	7.86513	8.13	10.71	0.11		1.65	2.51	0.23
Xi et al., 2021, Contribution to Geology and Mineral Resources Research		The Southern THM		36.8	36.9	114	114				DW-2					127											56.87	0.57		16.02		6.33			5.34	4.62	0.07		0.51	6.94	0.27
Xi et al., 2021, Contribution to Geology and Mineral Resources Research		The Southern THM		36.8	36.9	114	114				DW-17					127											57.87	0.55		15.46		5.92			4.45	3.67	0.14		0.64	7.53	0.25
Xi et al., 2021, Contribution to Geology and Mineral Resources Research		The Southern THM		36.8	36.9	114	114				DW-19					126.9											54.84	0.85		16.26		6.3			8.32	3.66	0.11		0.51	6.72	0.38
Xi et al., 2021, Contribution to Geology and Mineral Resources Research		The Southern THM		36.8	36.9	114	114				DK-5					125.2											57.81	0.65		15.79		6.86			5.56	3.85	0.08		2.26	5.02	0.3
Xi et al., 2021, Contribution to Geology and Mineral Resources Research		The Southern THM		36.8	36.9	114	114				DK-11					125.2											57.63	0.65		16.02		7.17			4.94	3.77	0.07		2.73	4.86	0.31
Xi et al., 2021, Contribution to Geology and Mineral Resources Research		The Southern THM		36.8	36.9	114	114				DK-13					125.2											60.76	0.51		16.35		5.63			4.41	2.83	0.1		2.8	4.54	0.26
Xi et al., 2021, Contribution to Geology and Mineral Resources Research		The Southern THM		36.8	36.9	114	114				DQ-59					126											60.78	0.41		15.71		6.27			3.5	2.42	0.18		3.49	4.89	0.19
Xi et al., 2021, Contribution to Geology and Mineral Resources Research		The Southern THM		36.8	36.9	114	114				DQ-51					126											52.53	0.81		15.18		10.23			7.96	6.56	0.17		1.76	3.37	0.39
Xi et al., 2021, Contribution to Geology and Mineral Resources Research		The Southern THM		36.8	36.9	114	114				DQ-80					126											59.33	0.67		16.92		6.17			6.43	3.2	0.13		1.88	4.59	0.29
Xue et al., 2019, Geological Journal		The Northern THM		39.24	39.24	114.8	114.9				LY-39/1					127.1											66.21	0.53		14.56		1.65	2.5	3.98467	3.43	2.58	0.1		3.77	3.56	0.22
Xue et al., 2019, Geological Journal		The Northern THM		39.24	39.24	114.8	114.9				LY-39/2					127.1											62.81	0.75		15.89		2.15	2.6	4.53457	5.15	2.29	0.08		2.99	3.49	0.3
Xue et al., 2019, Geological Journal		The Northern THM		39.24	39.24	114.8	114.9				LY-39/3					127.1											63.16	0.68		15.68		4.36	1.35	5.27313	3.8	1.82	0.12		2.99	3.8	0.26
Xue et al., 2019, Geological Journal		The Northern THM		39.26	39.26	114.85	114.85				LY-40/1					131.4											60.68	0.89		15.99		3.34	2.32	5.32533	4.62	2.78	0.08		3.41	4.17	0.42
Xue et al., 2019, Geological Journal		The Northern THM		39.26	39.26	114.85	114.85				LY-40/2					131.4											60.44	0.82		15.91		5.1	1.13	5.71898	3.27	2.93	0.08		3.86	4.54	0.28
Xue et al., 2019, Geological Journal		The Northern THM		39.27	39.27	114.78	114.78				LYN-3/1					130.3											59.13	0.88		17.73		3.39	2.5	5.55032	5.06	1.74	0.1		2.73	4.66	0.36
Xue et al., 2019, Geological Journal		The Northern THM		39.27	39.27	114.78	114.78				LYN-3/2					130.3											66.46	0.49		15.22		0.41	0.52	0.888918	3.06	1.34	0.05		3.25	6.31	0.21
Xue et al., 2019, Lithos		The Northern THM		39.2305	39.2305	114.748	114.748				LYN-1/1					112.8											46.97	1.44		15.72		4.51	3.83	7.8881	6.75	4.65	0.12		3.79	3.48	0.99
Xue et al., 2019, Lithos		The Northern THM		39.2304	39.2304	114.751	114.751				LYN-2/1					111											46.65	1.45		16.01		3.34	4.58	7.58533	7.06	4.47	0.13		3.7	4.22	0.98
Xue et al., 2019, Lithos		The Northern THM		39.3976	39.3976	114.858	114.858				LY-8/1					112.2											44.57	2.01		16.63		4.3	5.44	9.30914	7.85	4.96	0.14		3.67	3.47	1.14
Xue et al., 2019, Lithos		The Northern THM		39.4873	39.4873	114.975	114.975				LY-16/1					114.5											44.51	1.71		14.44		3.99	5.44	9.0302	9.2	8.37	0.15		3.41	2.65	1.01
Xue et al., 2019, Lithos		The Northern THM		39.4793	39.4793	114.951	114.951				LY-18/1					122.5											48.32	2.08		15.26		4.38	4.83	8.77112	6.07	4.57	0.11		4.36	3.17	1.14
Xue et al., 2019, Lithos		The Northern THM		39.5269	39.5269	114.847	114.847				LY-13/1					120											50.25	1.95		15.66		4.63	4.58	8.74607	5.29	4.52	0.11		4.5	3.7	1.03
Xue et al., 2019, Lithos		The Northern THM		39.5269	39.5269	114.847	114.847				LY-13/2					120											50.16	1.91		15.51		4.02	5.05	8.6672	5.56	5.22	0.12		4.17	3.7	0.95
Xue et al., 2019, Lithos		The Northern THM		39.5098	39.5098	114.996	114.996				LY-15/1					125.2											51.77	1.6		15.82		3.28	4.36	7.31134	4.75	4.82	0.09		4.25	3.36	1
Xue et al., 2019, Lithos		The Northern THM		39.5098	39.5098	114.996	114.996				LY-15/2					120											50.44	1.59		15.44		3.44	4.04	7.13531	5.51	4.36	0.09		3.04	4.51	1.02
Xue et al., 2019, Lithos		The Northern THM		39.2584	39.2584	114.787	114.787				LYN-4/1					123.5											55.05	1.57		16.01		4.37	3.32	7.25213	3.81	4.4	0.09		4.05	3.96	0.95
Xue et al., 2019, Lithos		The Northern THM		39.4873	39.4873	114.975	114.975				LY-16/2					116.6											55.6	1.09		15.23		1.97	3.65	5.42261	5.2	2.5	0.09		2.84	5.22	0.86
Xue et al., 2019, Lithos		The Northern THM		39.2289	39.2289	114.78	114.78				LY-26/1					120.2											56.5	1.14		15.9		3.32	3	5.98734	3.65	2.68	0.07		4.51	4.21	0.98
Xue et al., 2019, Lithos		The Northern THM		39.2289	39.2289	114.78	114.78				LY-26/2					120											56.82	1.15		15.98		3.26	3.07	6.00335	3.48	2.71	0.08		4.12	4.63	0.97
Xue et al., 2019, Lithos		The Northern THM		39.4064	39.4064	114.974	114.974				LY-7/1					120											47.98	1.62		14.39		4.88	3.75	8.14102	6.03	5.01	0.12		3.76	2.84	0.93
Xue et al., 2019, Lithos		The Northern THM		39.1619	39.1619	114.798	114.798				LY-34/1					130.6											58.02	0.95		16.8		3.23	2.89	5.79635	3.97	3.28	0.05		3.23	4.74	0.41
Xue et al., 2019, Lithos		The Northern THM		39.2305	39.2305	114.748	114.748				LYN-1/4					126.9											68.65	0.38		15.32		1.63	1.17	2.63667	2.02	1.07	0.06		4.07	4.01	0.18
Xue et al., 2019, Lithos		The Northern THM		39.2304	39.2304	114.751	114.751				LYN-1/5					129											73.27	0.23		14.23		1.24	0.31	1.42575	0.76	0.37	0.03		4.77	4.02	0.06
Xue et al., 2021, Lithos		The Northern THM		39.1621	39.1621	114.796	114.796				LY-33/1					133.1											75.2	0.11		13.21		0.73	0.3	0.956854	0.34	0.13	0.01		4.81	4.47	0.02
Xue et al., 2021, Lithos		The Northern THM		39.1883	39.1883	114.856	114.856				LY-36/1					129.9											74.93	0.23		13.17		0.77	0.3	0.992846	0.67	0.21	0.05		4.58	4.45	0.02
Xue et al., 2021, Lithos		The Northern THM		39.2271	39.2271	114.917	114.917				LY-37/1–1					130											75.95	0.13		13.03		0.86	0.09	0.863828	0.36	0.11	0.02		4.43	4.33	0.01
Xue et al., 2021, Lithos		The Northern THM		39.26	39.26	114.681	114.681				LY-19/1					130											69.17	0.57		14.5		1.42	1.55	2.82772	2.27	1.17	0.05		4.74	3.89	0.16
Xue et al., 2021, Lithos		The Northern THM		39.2651	39.2651	114.699	114.699				LY-21/2					130											70.39	0.35		14.68		1.05	0.99	1.93479	1.75	0.78	0.04		4.86	4.25	0.13
Xue et al., 2021, Lithos		The Northern THM		39.2438	39.2438	114.72	114.72				LY-22/3					130											69.58	0.39		14.9		1.17	1.11	2.16277	2.24	0.84	0.05		3.62	4.83	0.14
Xue et al., 2021, Lithos		The Northern THM		39.2438	39.2438	114.72	114.72				LY-22/4–1					130											69.77	0.5		14.37		1.46	1.31	2.62371	2.37	1.07	0.04		3.57	4.59	0.17
Xue et al., 2021, Lithos		The Northern THM		39.2305	39.2305	114.748	114.748				LYN-1/3					128.2											71.34	0.36		14.07		1.34	1.13	2.33573	2.01	1.03	0.06		4.14	3.91	0.16
Xue et al., 2021, Lithos		The Northern THM		39.2651	39.2651	114.699	114.699				LY-21/1					127.9											61.99	0.74		16.77		2.21	2.58	4.56856	4	1.99	0.08		3.17	4.92	0.36
Xue et al., 2021, Lithos		The Northern THM		39.2305	39.2305	114.748	114.748				LYN-1/2					130											60.98	0.95		16.44		3.49	2.07	5.2103	2	1.91	0.05		4.01	4.3	0.86
Xue et al., 2021, Lithos		The Northern THM		39.2438	39.2438	114.72	114.72				LY-22/4–2					130											60.85	1.01		16.42		2.73	2.82	5.27645	3.33	2.67	0.05		2.37	5.7	0.43
Xue et al., 2021, Lithos		The Northern THM		39.2271	39.2271	114.917	114.917				LY-37/1–2					130											65.23	0.49		16.8		1.61	1.56	3.00868	3.07	1.36	0.13		2.05	6.94	0.18
Xue et al., 2021, Lithos		The Northern THM		39.2637	39.2637	114.678	114.678				LY-20/1					130											58.84	0.91		16.76		2.41	3.64	5.80852	5.07	2.74	0.1		3.47	4.13	0.33
Xue et al., 2021, Lithos		The Northern THM		39.2438	39.2438	114.72	114.72				LY-22/1					130											58.99	0.84		16.29		3.45	3.54	6.64431	5.02	3.34	0.13		2.46	4.45	0.39
Xue et al., 2021, Lithos		The Northern THM		39.2438	39.2438	114.72	114.72				LY-22/2					130											58.02	0.86		16.55		3.23	3.75	6.65635	5.69	3.46	0.14		2.7	4.19	0.4
Xue et al., 2021, Lithos		The Northern THM		39.3177	39.3177	114.867	114.867				LY-42/1					131.9											59.23	0.98		15.69		3.65	2.68	5.96427	3.95	3.76	0.12		1.9	4.73	0.32
Xue et al., 2021, Lithos		The Northern THM		39.3177	39.3177	114.867	114.867				LY-42/2					132											55.01	1.08		16.86		5.06	2.78	7.33299	5.03	3.74	0.12		2.98	4.64	0.35
Yang et al., 2018, Geological Journal		The Northern THM		39.2767	39.2767	114.855	114.855				ZJZ‐1‐1	Biotite granite				129.85											68.86	0.41		15.29				2.74439	2.15	0.94	0.05		4.95	3.87	0.15
Yang et al., 2018, Geological Journal		The Northern THM		39.2767	39.2767	114.855	114.855				ZJZ‐1‐2	Pyroxene monzonite				124.03											70.26	0.44		14.83				2.72639	1.73	0.7	0.03		5.21	3.73	0.1
Yang et al., 2018, Geological Journal		The Northern THM		39.2767	39.2767	114.855	114.855				ZJZ‐1‐3	Dioritic porphyry				121											59.81	0.73		16.83				5.60575	4.89	2.29	0.1		3.03	4.13	0.36
Yang et al., 2018, Geological Journal		The Northern THM		39.2767	39.2767	114.855	114.855				ZJZ‐1‐4	Pyroxene monzonite				124.03											67.01	0.5		15.7				3.04132	2.06	0.89	0.06		4.81	4.37	0.11
Yang et al., 2018, Geological Journal		The Northern THM		39.2767	39.2767	114.855	114.855				ZJZ‐1‐5	Dioritic porphyry				121											61.28	0.65		16.56				5.50678	4.72	2.16	0.09		3.27	3.83	0.32
Yang et al., 2018, Geological Journal		The Northern THM		39.2767	39.2767	114.855	114.855				ZJZ‐1‐6	Biotite granite				129.85											68.97	0.4		14.69				2.7174	2.64	0.97	0.05		3.13	4.3	0.14
Ying et al., 2007, Lithos		The Northern THM		38.13	38.13	110.87	110.87				03ZJS01					127.2											61.4	0.46		17.9		5.19			3.79	1.02	0.07		3.89	4.78	0.21
Ying et al., 2007, Lithos		The Northern THM		38.13	38.13	110.87	110.87				03ZJS01DUPL.					127.2
Ying et al., 2007, Lithos		The Northern THM		38.13	38.13	110.87	110.87				ZJS01					127.2											59.6	0.59		18.1		4.96			4.26	0.92	0.14		4.25	6.18	0.21
Ying et al., 2007, Lithos		The Northern THM		38.13	38.13	110.87	110.87				ZJS02					127.2											58.2	0.78		16.5		6.17			5.3	1.6	0.16		5.35	5.15	0.22
Ying et al., 2007, Lithos		The Northern THM		38.13	38.13	110.87	110.87				ZJS02					127.2											58.3	0.79		16.6		6.17			5.28	1.59	0.16		5.34	5.07	0.22
Ying et al., 2007, Lithos		The Northern THM		38.13	38.13	110.87	110.87				ZJS03					127.2											52.8	0.92		13.8		9.58			7.79	3.64	0.17		6.01	3.49	0.61
Ying et al., 2007, Lithos		The Northern THM		38.13	38.13	110.87	110.87				ZJS03					127.2											53.3	0.99		13.9		9.86			7.73	3.51	0.17		6.07	2.6	0.62
Ying et al., 2007, Lithos		The Northern THM		38.13	38.13	110.87	110.87				03ZJS06					127.2											53.5	0.98		15.7		8.31			5.24	1.82	0.17		8.43	4.4	0.31
Ying et al., 2007, Lithos		The Northern THM		38.13	38.13	110.87	110.87				03ZJS07					127.2											53.5	0.97		15.6		8.21			4.94	1.6	0.19		8.6	4.59	0.28
Ying et al., 2007, Lithos		The Northern THM		38.13	38.13	110.87	110.87				03ZJS07SUPL					127.2
Ying et al., 2007, Lithos		The Northern THM		38.13	38.13	110.87	110.87				03ZJS09					127.2											53	0.97		14.6		9.51			7.12	3.02	0.17		6.86	2.88	0.56
Ying et al., 2007, Lithos		The Northern THM		38.13	38.13	110.87	110.87				03ZJS13					127.2											55	0.91		15.5		8.88			7.12	2.52	0.16		5.03	3.29	0.51
Ying et al., 2007, Lithos		The Northern THM		38.13	38.13	110.87	110.87				03ZJS12					127.2											55.3	0.55		19		4.06			2.48	0.47	0.08		12.1	4.25	0.16
Ying et al., 2007, Lithos		The Northern THM		38.13	38.13	110.87	110.87				ZJS15					127.2											51.4	1.15		18.1		5.16			4.79	0.69	0.11		11.9	5.05	0.16
Ying et al., 2007, Lithos		The Northern THM		38.13	38.13	110.87	110.87				ZJS15					127.2											51.2	1.16		18.1		5.25			4.8	0.69	0.11		11.8	5.09	0.15
Ying et al., 2007, Lithos		The Northern THM		38.13	38.13	110.87	110.87				ZJS08					127.2											53.2	0.81		18.2		4.63			4.46	0.81	0.11		12.4	2.54	0.1
Zhang et al., 2014, Master's Dissertation		The Northern THM		39.4	39.4	114.94	114.94				ly064-1					139.7											52.7	0.91		17.21		6.86			7.88	4.82	0.1		2.08	3.94	0.82
Zhang et al., 2014, Master's Dissertation		The Northern THM		39.4	39.4	114.94	114.94				ly064-2					139.7											51.9	1.05		16.6		7.35			7.83	4.85	0.17		2.17	3.94	0.93
Zhang et al., 2014, Master's Dissertation		The Northern THM		39.4	39.4	114.94	114.94				ly064-3					139.7											52.99	0.96		17.27		7.36			7.75	4.41	0.1		1.55	4.03	0.86
Zhang et al., 2014, Master's Dissertation		The Northern THM		39.4	39.4	114.94	114.94				ly064-4					139.7											52.37	0.75		18.07		6.93			7.77	3.94	0.1		1.67	4.24	0.85
Zhang et al., 2014, Master's Dissertation		The Northern THM		39.4	39.4	114.94	114.94				LY301-1					139.7											51.74	1.41		15.1		10.25			7.95	6.61	0.13		1.55	3.14	0.29
Zhang et al., 2014, Master's Dissertation		The Northern THM		39.4	39.4	114.94	114.94				LY301-2					139.7											53.08	1.09		15.88		8.98			7.78	6.45	0.12		1.78	3.55	0.34
Zhang et al., 2014, Master's Dissertation		The Northern THM		39.4	39.4	114.94	114.94				LY301-3					139.7											53.19	1.08		15.43		8.93			7.41	6.43	0.12		1.76	3.39	0.4
Zhang et al., 2014, Master's Dissertation		The Northern THM		39.4	39.4	114.94	114.94				LY301-4					139.7											53.41	1.08		15.95		8.73			7.49	6.19	0.1		1.86	3.46	0.31
Zhang et al., 2014, Master's Dissertation		The Northern THM		39.4	39.4	114.94	114.94				LY301-5					139.7											53.23	1.09		15.82		8.79			7.71	6.39	0.12		1.82	3.51	0.31
Zhang et al., 2014, Master's Dissertation		The Northern THM		39.4	39.4	114.94	114.94				LY301-6					139.7											53.22	1.2		16.27		8.99			7.54	5.74	0.11		2.04	3.79	0.45
Zhang et al., 2014, Master's Dissertation		The Northern THM		39.4	39.4	114.94	114.94				LY301-7					139.7											52.21	1.21		17.41		8.72			7.99	4.88	0.11		1.67	3.84	0.53
Zhang et al., 2014, Master's Dissertation		The Northern THM		39.4	39.4	114.94	114.94				LY301-8					139.7											50.1	1.19		12.46		9.77			7.45	11.49	0.11		2.01	3.71	0.47
Zhang et al., 2014, Master's Dissertation		The Northern THM		39.4	39.4	114.94	114.94				LY301-9					139.7											49.79	1.25		13.77		9.72			8.35	10.24	0.13		1.67	3.51	0.46
Zhang et al., 2014, Master's Dissertation		The Northern THM		39.4	39.4	114.94	114.94				ZJ023					139.7											46.89	0.45		10.7		12.06			8.79	17.54	0.14		0.81	1.64	0.08
Zhang et al., 2014, Master's Dissertation		The Northern THM		39.4	39.4	114.94	114.94				LY301-10					139.7											45.7	0.78		6.42		12.61			6.44	23.56	0.13		0.71	1.46	0.62
Zhang et al., 2014, Master's Dissertation		The Northern THM		39.4	39.4	114.94	114.94				LY301-11					139.7											45.57	0.51		7.38		12.78			6.55	23.95	0.12		0.81	1.65	0.29
Zhang et al., 2014, Master's Dissertation		The Northern THM		39.4	39.4	114.94	114.94				ly064-1-1					139.7											46.2	1.5		14.7		11.26			9.24	4.94	0.62		1.02	3.43	1.71
Zhang et al., 2014, Master's Dissertation		The Northern THM		39.4	39.4	114.94	114.94				LY083					128											67.02	0.52		15.41		3.3			2.8	1.25	0.07		4.08	4.19	0.15
Zhang et al., 2014, Master's Dissertation		The Northern THM		39.4	39.4	114.94	114.94				LY038					128											61.02	0.7		16.73		4.94			3.89	2.16	0.09		4.02	4.07	0.28
Zhang et al., 2014, Master's Dissertation		The Northern THM		39.4	39.4	114.94	114.94				LY038					128											65.72	0.64		15.38		4.41			3.33	1.71	0.07		3.1	3.74	0.22
Zhang et al., 2014, Master's Dissertation		The Northern THM		39.4	39.4	114.94	114.94				ly036-3					128											63.78	0.44		14.01		4.66			3.11	1.11	0.39		4.05	3.35	0.33
Zhang et al., 2014, Master's Dissertation		The Northern THM		39.4	39.4	114.94	114.94				ly027-1					128											62.23	0.71		14.88		5.1			5.27	2.76	0.1		3	3.7	0.45
Zhang et al., 2014, Master's Dissertation		The Northern THM		39.4	39.4	114.94	114.94				ly038-1					128											56.55	0.98		15.55		7.27			6.02	3.49	0.15		2.51	4.28	0.59
Zhang et al., 2014, Master's Dissertation		The Northern THM		39.4	39.4	114.94	114.94				ly038-2					128											53.04	1.23		16.17		7.76			6.44	4.47	0.16		2.81	4.28	0.59
Zhang et al., 2014, Master's Dissertation		The Northern THM		39.4	39.4	114.94	114.94				ly039-2					128											61.15	1.04		15.09		5.34			3.49	2.43	0.11		4.29	3.85	0.47
Zhang et al., 2014, Master's Dissertation		The Northern THM		39.4	39.4	114.94	114.94				ly039-3					128											64.38	1.05		15.12		4.61			1.82	0.76	0.08		5.13	4.45	0.19
Zhang et al., 2014, Master's Dissertation		The Northern THM		39.4	39.4	114.94	114.94				ly040-1					128											64.32	0.69		16.93		2.58			1.91	0.58	0.06		5.88	4.4	0.23
Zhang et al., 2014, Master's Dissertation		The Northern THM		39.4	39.4	114.94	114.94				LY026-1					128											68.83	0.43		14.59		2.93			2.69	1.24	0.05		3.87	3.7	0.16
Zhang et al., 2014, Master's Dissertation		The Northern THM		39.4	39.4	114.94	114.94				LY026-2					128											67.41	0.44		14.89		3.06			2.87	1.33	0.06		4.03	3.86	0.17
Zhang et al., 2014, Master's Dissertation		The Northern THM		39.4	39.4	114.94	114.94				ly025-3					128											62.78	0.74		14.53		5.31			4.21	2.42	0.07		3.18	4.01	0.52
Zhang et al., 2014, Master's Dissertation		The Northern THM		39.4	39.4	114.94	114.94				ly083-2					127											65.72	0.62		14.79		3.66			3.55	1.71	0.08		4.04	3.71	0.4
Zhang et al., 2014, Master's Dissertation		The Northern THM		39.4	39.4	114.94	114.94				LY081-4					127											69.06	0.42		13.91		3.19			2.52	1.12	0.05		3.33	3.95	0.17
Zhang et al., 2014, Master's Dissertation		The Northern THM		39.4	39.4	114.94	114.94				ly061-1(A)					127											73.05	0.21		12.65		1.06			0.86	0.38	0.06		9.09	1.11	0.03
Zhang et al., 2014, Master's Dissertation		The Northern THM		39.4	39.4	114.94	114.94				ly061-1(B)					127											69.81	0.13		12.65		1.36			2.12	1.11	0.21		9.8	0.64	0.04
Zhang et al., 2014, Master's Dissertation		The Northern THM		39.4	39.4	114.94	114.94				ly061-2					127											73.33	0.13		12.17		1.78			0.47	0.22	0.1		9.42	0.68	0.03
Zhang et al., 2014, Master's Dissertation		The Northern THM		39.4	39.4	114.94	114.94				ly062-12					127											72.54	0.14		12.96		1.32			0.64	0.32	0.05		9.67	0.92	0.04
Zhang et al., 2014, Master's Dissertation		The Northern THM		39.4	39.4	114.94	114.94				ly063-4					127											62.07	0.43		16.83		1.62			2.14	0.47	0.1		8.27	3.83	0.15
[truncated: 122 more columns]

## Sheet: Great Xing'an Range (GXR)
CITATIONS	TECTONIC SETTING	LOCATION	LOCATION COMMENT	LATITUDE MIN	LATITUDE MAX	LONGITUDE MIN	LONGITUDE MAX	LAND OR SEA	ELEVATION MIN	ELEVATION MAX	SAMPLE NAME	ROCK NAME	MIN. AGE (YRS.)	MAX. AGE (YRS.)	GEOL.	AGE	ERUPTION DAY	ERUPTION MONTH	ERUPTION YEAR	ROCK TEXTURE	ROCK TYPE	DRILL DEPTH MIN	DRILL DEPTHAX	ALTERATION	MINERAL	MATERIAL	SIO2(WT%)	TIO2(WT%)	B2O3(WT%)	AL2O3(WT%)	CR2O3(WT%)	FE2O3(WT%)	FEO(WT%)	FEOT(WT%)	CAO(WT%)	MGO(WT%)	MNO(WT%)	NIO(WT%)	K2O(WT%)	NA2O(WT%)	P2O5(WT%)	H2O(WT%)	H2OP(WT%)	H2OM(WT%)	H2OT(WT%)	CO2(WT%)	CO1(WT%)	F(WT%)	CL(WT%)
Jiang et al. 2012, Acta Petrologica Sinica		The Southern GXR	The Xing’an Block	43.71	43.75	118.25	118.29				DJ10-1					170.7											76.39	0.086		13.73		0.27	2	2.24295	0.19	0.3	0.067		3.43	0.15	0.02
Jiang et al. 2012, Acta Petrologica Sinica		The Southern GXR	The Xing’an Block	43.71	43.75	118.25	118.29				DJ10-3					170.7											72.25	0.08		13.13		0.74	4.6	5.26585	0.14	0.42	0.075		3.52	0.15	0.02
Jiang et al. 2012, Acta Petrologica Sinica		The Southern GXR	The Xing’an-southwestern Songnen Block	43.4179	43.4179	118.099	118.099				DJ10-10					143.5											78.16	0.13		11.34		0.85	0.3	1.06483	0.33	0.1	0.022		5.62	1.6	0.03
Jiang et al. 2012, Acta Petrologica Sinica		The Southern GXR	The Xing’an-southwestern Songnen Block	43.4179	43.4179	118.099	118.099				DJ10-12					144.3											69.58	0.19		12.81		2.25	0.45	2.47455	3.22	0.25	0.12		4.03	3.32	0.04
Jiang et al. 2012, Acta Petrologica Sinica		The Southern GXR	The Xing’an-southwestern Songnen Block	43.4187	43.4187	118.099	118.099				DJ10-14					145.3											77.99	0.14		12.45		1.12	0.4	1.40778	0.27	0.48	0.034		4.27	0.63	0.03
Jiang et al. 2012, Acta Petrologica Sinica		The Southern GXR	The Xing’an-southwestern Songnen Block	43.356	43.356	118.175	118.175				DJ10-15					146											77.98	0.078		11.34		0.92	0.2	1.02782	0.12	0.004	0.013		4.93	3.87	0.02
Jiang et al. 2012, Acta Petrologica Sinica		The Southern GXR	The Xing’an-southwestern Songnen Block	43.3528	43.3528	118.178	118.178				DJ10-16					133.2											59.44	1.47		14.31		5.11	2.75	7.34798	4.32	2.93	0.099		2.99	4.06	0.71
Wu, 2013, Master' Dissertation		The Southern GXR	The Xing’an-southwestern Songnen Block	42.8667	42.8667	117.383	117.383				HS101					155											70.44	0.42		14.07		2.69	0.61	3.03046	0.3	0.27	0.12		5.59	4.38	0.09
Wu, 2013, Master' Dissertation		The Southern GXR	The Xing’an-southwestern Songnen Block	42.8667	42.8667	117.383	117.383				HS102					155											70.71	0.4		13.55		2.4	0.77	2.92952	0.23	0.31	0.1		7.99	2.62	0.08
Wu, 2013, Master' Dissertation		The Southern GXR	The Xing’an-southwestern Songnen Block	42.8667	42.8667	117.383	117.383				HS103					155											71.43	0.41		13.51		2.36	0.93	3.05353	0.14	0.28	0.08		6.5	3.4	0.08
Wu, 2013, Master' Dissertation		The Southern GXR	The Xing’an-southwestern Songnen Block	42.8667	42.8667	117.383	117.383				HS104					155											73.19	0.29		11.67		2.57	0.78	3.09249	0.07	0.15	0.08		9.73	0.43	0.03
Wu, 2013, Master' Dissertation		The Southern GXR	The Xing’an-southwestern Songnen Block	42.8667	42.8667	117.383	117.383				HS106					155											72.8	0.3		12.18		2.23	0.85	2.85655	0	0.11	0.05		10.4	0.38	0.03
Wu, 2013, Master' Dissertation		The Southern GXR	The Xing’an-southwestern Songnen Block	42.8667	42.8667	117.383	117.383				HS502					155											72.37	0.31		12.41		2.45	1.04	3.24451	0.02	0.12	0.06		9.16	1.36	0.03
Wu, 2013, Master' Dissertation		The Southern GXR	The Xing’an-southwestern Songnen Block	42.8667	42.8667	117.383	117.383				HS505					154.7											72.68	0.3		12.17		2.58	0.87	3.19148	0.06	0.13	0.08		9.24	1.12	0.03
Shi et al. 2015, Doctoral Dissertation		The Central GXR		47.6686	47.6686	120.34	120.34				Z11-67					172											72.58	0.26		13.89		1.47	0.26	1.58271	0.42	0.36	0.08		4.62	4.58	0.05
Shi et al. 2015, Doctoral Dissertation		The Central GXR		47.645	47.645	120.21	120.21				Z11-72					174											75.02	0.23		12.54		1.03	0.22	1.14679	0.86	0.21	0.05		4.42	4.12	0.06
Shi et al. 2015, Doctoral Dissertation		The Central GXR		47.8822	47.8822	120.9	120.9				Z11-80					179											63.52	0.8		15.9		2.49	2.13	4.3705	3.19	1.74	0.13		3.65	4.2	0.35
Shi et al. 2015, Doctoral Dissertation		The Central GXR		47.3858	47.3858	121.206	121.206				Z10-17					136											73.2	0.3		13.7		1.26	0.55	1.68375	0.76	0.37	0.04		4.54	4.34	0.06
Shi et al. 2015, Doctoral Dissertation		The Central GXR		47.5	47.5	122.3	122.3				Z10-26					133											72	0.38		14.2		1.22	0.8	1.89776	1.34	0.59	0.05		4.41	4.02	0.08
Shi et al. 2015, Doctoral Dissertation		The Central GXR		47.9639	47.9639	121.913	121.913				Z10-32					129											70.6	0.31		14.8		1.08	0.95	1.92178	1.41	0.44	0.09		4.43	4.56	0.07
Shi et al. 2015, Doctoral Dissertation		The Central GXR		47.7736	47.7736	122.614	122.614				Z10-37					131											76.7	0.1		12.7		0.49	0.2	0.640902	0.47	0.08	0.07		4.46	4.27	0
Shi et al. 2015, Doctoral Dissertation		The Central GXR		47.6883	47.6883	122.487	122.487				Z10-39					129											70	0.36		14.7		1.84	0.86	2.51563	1.86	0.68	0.06		3.96	4.19	0.11
Shi et al. 2015, Doctoral Dissertation		The Central GXR		47.1203	47.1203	122.072	122.072				Z11-60					132											72.64	0.27		14.16		0.94	0.75	1.59581	1.43	0.52	0.04		3.71	4.53	0.07
Shi et al. 2015, Doctoral Dissertation		The Central GXR		47.0683	47.0683	120.571	120.571				Z11-63					136											68.04	0.51		14.78		1.9	1.03	2.73962	1.89	0.99	0.09		4.29	3.63	0.17
Shi et al. 2015, Doctoral Dissertation		The Central GXR		47.0758	47.0758	120.838	120.838				Z11-62					126											73.98	0.19		13.58		1.12	0.25	1.25778	0.31	0.23	0.07		5.41	3.57	0.06
Shi et al. 2015, Doctoral Dissertation		The Central GXR		47	48	120	123				Z11-64		145	163.5		154.25											77.68	0.12		12.21		0.69	0.1	0.720862	0.25	0.04	0.01		4.38	3.79	0.01
Shi et al. 2015, Doctoral Dissertation		The Central GXR		47	48	120	123				Z10-18		145	163.5		154.25											72.1	0.42		13.9		1.16	1.1	2.14377	0.7	0.53	0.06		4.5	4.26	0.1
Shi et al. 2015, Doctoral Dissertation		The Central GXR		47	48	120	123				H13-17		145	163.5		154.25											75.6	0.19		12.7		1.02	0.44	1.3578	0.44	0.17	0.07		4.28	4.65	0.08
Shi et al. 2015, Doctoral Dissertation		The Central GXR		47	48	120	123				H13-20		145	163.5		154.25											74.2	0.23		13.6		0.96	0.56	1.42381	0.96	0.29	0.07		4.19	4.48	0.09
Shi et al. 2015, Doctoral Dissertation		The Central GXR		47	48	120	123				HP36-1		145	163.5		154.25											60.48	0.83		17.81		1.77	2.35	3.94265	3.93	1.49	0.1		3.87	4.02	0.31
Shi et al. 2015, Doctoral Dissertation		The Central GXR		47	48	120	123				3034-1		145	163.5		154.25											55.08	1.49		16.65		3.26	4.77	7.70335	6.25	4.32	0.18		0.94	4.35	0.61
Shi et al. 2015, Doctoral Dissertation		The Central GXR		47	48	120	123				3034-2		145	163.5		154.25											57.15	1.4		16.3		3.13	4.6	7.41637	6.47	3.56	0.18		2.14	3.22	0.56
Shi et al. 2015, Doctoral Dissertation		The Central GXR		47	48	120	123				3034-3		145	163.5		154.25											54.91	1.49		16.73		3.74	4.45	7.81525	6.66	3.79	0.22		1.83	3.85	0.61
Shi et al. 2015, Doctoral Dissertation		The Central GXR		47	48	120	123				3034-4		145	163.5		154.25											58.69	1.32		15.21		3.51	4.38	7.5383	5.63	3.81	0.14		1.18	3.66	0.54
Shi et al. 2015, Doctoral Dissertation		The Central GXR		47	48	120	123				Z10-28		145	163.5		154.25											62	0.73		16.8		2.08	1.45	3.32158	3.12	1.13	0.09		3.91	5.46	0.19
Shi et al. 2015, Doctoral Dissertation		The Central GXR		47	48	120	123				D1277-1		145	163.5		154.25											70.78	0.39		14.44		1.59	0.84	2.27068	1.21	0.76	0.09		4.25	4.49	0.12
Shi et al. 2015, Doctoral Dissertation		The Central GXR		47	48	120	123				3125-B1		145	163.5		154.25											67	0.67		15.1		1.75	2.32	3.89465	1.64	1.06	0.08		4	4.23	0.18
Shi et al. 2015, Doctoral Dissertation		The Central GXR		47	48	120	123				B5106-1		145	163.5		154.25											74.6	0.2		13.3		0.98	0.6	1.4818	0.21	0.33	0.05		4.37	4.12	0.05
Shi et al. 2015, Doctoral Dissertation		The Central GXR		47	48	120	123				HfD1212B1		145	163.5		154.25											71.62	0.43		14.4		1.5	0.54	1.8897	0.35	0.46	0.08		5.19	3.91	0.09
Shi et al. 2015, Doctoral Dissertation		The Central GXR		47	48	120	123				HB4222-1		145	163.5		154.25											75.94	0.24		12.55		1.53	0.74	2.11669	0.76	0.28	0.07		3.74	3.24	0.05
Shi et al. 2015, Doctoral Dissertation		The Central GXR		47	48	120	123				HfB4266-1		145	163.5		154.25											74.5	0.26		13.56		0.92	0.78	1.60782	0.36	0.23	0.04		4.96	2.76	0.05
Shi et al. 2015, Doctoral Dissertation		The Central GXR		47	48	120	123				B1068-1		130	145		137.5											58.4	0.98		16.9		3.62	3.52	6.77728	5.28	2.67	0.1		1.66	4.27	0.27
Shi et al. 2015, Doctoral Dissertation		The Central GXR		47	48	120	123				B2005-2		130	145		137.5											55.4	1.68		15.7		6.65	1.85	7.83367	6.57	3.15	0.11		2.12	3.25	0.91
Shi et al. 2015, Doctoral Dissertation		The Central GXR		47	48	120	123				B2010-1		130	145		137.5											62.3	0.44		15.3		2.36	1.2	3.32353	4.06	1.67	0.07		3.01	1.73	0.12
Shi et al. 2015, Doctoral Dissertation		The Central GXR		47	48	120	123				B2022-1		130	145		137.5											68.4	0.39		15.7		1.78	1.02	2.62164	2.08	0.45	0.04		3.8	4.56	0.08
Shi et al. 2015, Doctoral Dissertation		The Central GXR		47	48	120	123				B2034-1		130	145		137.5											60.9	0.76		16.35		2.29	2.95	5.01054	5.06	1.96	0.1		3.01	3.05	0.24
Shi et al. 2015, Doctoral Dissertation		The Central GXR		47	48	120	123				B2082-2-1		130	145		137.5											63.8	0.66		16.6		3.41	1.12	4.18832	2.74	1.4	0.07		3.58	4.5	0.23
Shi et al. 2015, Doctoral Dissertation		The Central GXR		47	48	120	123				B3007-1		130	145		137.5											69.1	0.55		14.8		2.47	0.62	2.84251	1.16	0.45	0.06		4.84	3.99	0.12
Shi et al. 2015, Doctoral Dissertation		The Central GXR		47	48	120	123				B4063-1		130	145		137.5											67	0.58		15.1		1.99	2.02	3.8106	2.29	1.38	0.08		4.43	3.75	0.17
Shi et al. 2015, Doctoral Dissertation		The Central GXR		47	48	120	123				B5049-3		130	145		137.5											55.1	1.09		16.9		3.46	4.7	7.81331	5.78	3.74	0.13		2.74	3.37	0.37
Shi et al. 2015, Doctoral Dissertation		The Central GXR		47	48	120	123				HfP38-2-1		130	145		137.5											60.42	0.91		18		2.9	1.52	4.12942	3.81	1.74	0.11		3.36	4.72	0.37
Shi et al. 2015, Doctoral Dissertation		The Central GXR		47	48	120	123				B2007-1		115	130		122.5											73.8	0.27		13.5		0.82	0.92	1.65784	0.42	0.21	0.03		4.74	3.95	0.05
Shi et al. 2015, Doctoral Dissertation		The Central GXR		47	48	120	123				B2008-1		115	130		122.5											73.8	0.12		14.1		1.12	0.38	1.38778	1.39	0.4	0.05		3.22	4.26	0.02
Shi et al. 2015, Doctoral Dissertation		The Central GXR		47	48	120	123				B2037-2		115	130		122.5											66.5	0.72		15.7		4.44	0.12	4.11511	2.24	0.63	0.04		3.67	4.22	0.21
Shi et al. 2015, Doctoral Dissertation		The Central GXR		47	48	120	123				B2041-3		115	130		122.5											66.8	0.66		16.2		3.63	0.25	3.51627	1.7	0.41	0.07		3.63	5.36	0.17
Shi et al. 2015, Doctoral Dissertation		The Central GXR		47	48	120	123				B2042-1		115	130		122.5											66.7	0.6		16.2		3.62	0.29	3.54728	2.25	0.56	0.05		3.1	5.1	0.18
Shi et al. 2015, Doctoral Dissertation		The Central GXR		47	48	120	123				B3038-1		115	130		122.5											75	0.18		13.3		0.76	0.25	0.933848	0.08	0.01	0.01		5.01	4.36	0.03
Shi et al. 2015, Doctoral Dissertation		The Central GXR		47	48	120	123				B3041-1		115	130		122.5											63.2	0.29		15.7		2.29	0.3	2.36054	4.37	1.18	0.07		1.79	2.03	0.08
Shi et al. 2015, Doctoral Dissertation		The Central GXR		47	48	120	123				B4019-1		115	130		122.5											77.2	0.12		11.1		1.98	0.31	2.0916	0.08	0.05	0.03		5.41	2.53	0.01
Shi et al. 2015, Doctoral Dissertation		The Central GXR		47	48	120	123				B4047-1		115	130		122.5											71.8	0.22		14.3		1.2	0.12	1.19976	1.96	0.35	0.02		4.11	2.23	0.01
Shi et al. 2015, Doctoral Dissertation		The Central GXR		47	48	120	123				B6011-1		115	130		122.5											65	0.71		16.2		3.26	1.3	4.23335	2.95	1.08	0.08		3.05	4.66	0.16
Shi et al. 2015, Doctoral Dissertation		The Central GXR		47	48	120	123				Z11-5-5		115	130		122.5											78.72	0.1		11.32		0.26	0.09	0.323948	0.18	0.06	0.01		4.89	3.23	0.02
Shi et al. 2015, Doctoral Dissertation		The Central GXR		47	48	120	123				4122-B1		115	130		122.5											62.9	0.79		17.4		2.7	1.45	3.87946	3.06	1.13	0.09		4.05	4.81	0.25
Shi et al. 2015, Doctoral Dissertation		The Central GXR		47	48	120	123				B5109-1		115	130		122.5											70	0.47		15.1		2.48	0.45	2.6815	0.46	0.27	0.04		3.44	5.9	0.15
Shi et al. 2015, Doctoral Dissertation		The Central GXR		47	48	120	123				B5110-1		115	130		122.5											67.6	0.48		15.3		1.53	1.2	2.57669	1.74	0.59	0.06		4.09	4.55	0.14
Shi et al. 2015, Doctoral Dissertation		The Central GXR		47	48	120	123				HfD12-19B3		115	130		122.5											70.48	0.43		14.3		1.33	0.93	2.12673	1.02	0.66	0.06		4.66	4.16	0.11
Shi et al. 2015, Doctoral Dissertation		The Central GXR		47	48	120	123				HB32-48-1		115	130		122.5											67.34	0.68		14.39		2.02	1.32	3.1376	2.06	1.03	0.1		3.36	4.34	0.22
Shi et al. 2015, Doctoral Dissertation		The Central GXR		47	48	120	123				HB32-56-1		115	130		122.5											70.04	0.47		13.66		0.66	2.41	3.00387	1.78	0.65	0.13		3.19	4.1	0.59
Shi et al. 2015, Doctoral Dissertation		The Central GXR		47	48	120	123				HfP22-01		115	130		122.5											76.08	0.18		12.38		1.04	0.18	1.11579	0.15	0.21	0.07		4.41	4.1	0.03
Shi et al. 2015, Doctoral Dissertation		The Central GXR		47	48	120	123				B3013-1		115	130		122.5											57.9	0.95		17.6		3.02	3.52	6.2374	6.08	2.72	0.11		1.4	4.12	0.29
Shi et al. 2015, Doctoral Dissertation		The Central GXR		47	48	120	123				PM312YQ38*		115	130		122.5											55.63	0.92		18.2		4.77	2.71	7.00205	5.34	3.41	0.1		1.46	3.95	0.31
Shi et al. 2015, Doctoral Dissertation		The Central GXR		47	48	120	123				PM312YQ44*		115	130		122.5											59.27	0.82		16.72		5.95	1.06	6.41381	4.7	1.75	0.1		2.11	3.99	0.32
Shi et al. 2015, Doctoral Dissertation		The Central GXR		47	48	120	123				PM312YQ49*		115	130		122.5											56.84	0.84		19.03		3.65	2.33	5.61427	6.05	2.6	0.14		2.41	3.9	0.37
Shi et al. 2015, Doctoral Dissertation		The Central GXR		47	48	120	123				PM312YQ67*		115	130		122.5											57.18	0.86		18.48		4	3.29	6.8892	6.01	2.14	0.14		2.9	3.83	0.32
Shi et al. 2015, Doctoral Dissertation		The Central GXR		47	48	120	123				B3230-4		163.5	174		168.75											75.12	0.22		13.02		0.98	0.55	1.4318	0.48	0.22	0.07		4.2	4.34	0.09
Shi et al. 2015, Doctoral Dissertation		The Central GXR		47	48	120	123				B3234-1		163.5	174		168.75											73.7	0.23		13.7		1.1	0.55	1.53978	0.47	0.31	0.06		4.69	4.62	0.06
Shi et al. 2015, Doctoral Dissertation		The Central GXR		47	48	120	123				B1245-1		174	201		187.5											65.8	0.64		15.8		1.84	2.17	3.82563	2.21	1.19	0.13		3.98	4.91	0.24
Shi et al. 2015, Doctoral Dissertation		The Central GXR		47	48	120	123				B4239-2		174	201		187.5											67.85	0.52		15.3		1.63	1.56	3.02667	1.66	0.88	0.12		4.17	4.56	0.21
Shi et al. 2015, Doctoral Dissertation		The Central GXR		47	48	120	123				B4239-3		174	201		187.5											67.8	0.51		14.8		1.5	1.66	3.0097	1.98	0.83	0.11		4.13	4.51	0.2
Shi et al. 2015, Doctoral Dissertation		The Central GXR		47	48	120	123				B4241-1		174	201		187.5											64.5	0.67		16		1.92	1.97	3.69762	2.25	1.29	0.12		3.88	4.45	0.26
Shi et al. 2015, Doctoral Dissertation		The Central GXR		47	48	120	123				B4246-1		174	201		187.5											63.3	0.76		16.3		2.35	2.26	4.37453	2.08	1.67	0.13		3.81	5.45	0.3
Shi et al. 2015, Doctoral Dissertation		The Central GXR		47	48	120	123				B4246-2		174	201		187.5											63.5	0.76		16.1		2.19	2.42	4.39056	3.01	1.55	0.13		3.71	4.99	0.3
Shi et al. 2015, Doctoral Dissertation		The Central GXR		47	48	120	123				B4247-1		174	201		187.5											65.15	0.68		15.88		2.61	1.58	3.92848	2.27	1.22	0.13		4.09	4.64	0.29
Shi et al. 2015, Doctoral Dissertation		The Central GXR		47	48	120	123				P22-07		101	145		123											77.46	0.13		11.63		1	0.12	1.0198	0.1	0.06	0.11		4.49	4.02	0.02
Shi et al. 2015, Doctoral Dissertation		The Central GXR		47	48	120	123				B5101-1		101	145		123											71.7	0.39		14.8		1.52	0.43	1.7977	0.65	0.4	0.05		4.45	4.78	0.1
Shi et al. 2015, Doctoral Dissertation		The Central GXR		47	48	120	123				B5101-2		101	145		123											65.9	0.54		16		1.88	1.75	3.44162	2.22	1.24	0.14		4.17	5.12	0.18
Shi et al. 2015, Doctoral Dissertation		The Central GXR		47	48	120	123				B5102-1		101	145		123											71.6	0.31		15.3		1.35	0.6	1.81473	0.53	0.48	0.09		4.05	4.39	0.12
Shi et al. 2015, Doctoral Dissertation		The Central GXR		47	48	120	123				B5102-2		101	145		123											69.6	0.47		15.2		1.67	1.27	2.77267	0.63	0.77	0.09		4.84	4.23	0.16
Sui et al. 2007,Acta Petrologica Sinica		The Northern GXR	The Xing’an Block	52.5306	52.5306	126.14	126.14				GW05067					190											63.97	0.65		16.07		5.46			5.11	2.53	0.09		2.37	3.1	0.14
Sui et al. 2007,Acta Petrologica Sinica		The Northern GXR	The Xing’an Block	52.0452	52.0452	125.644	125.644				GW05099					188											52.84	1.65		17.33		9.74			7.23	3.65	0.2		1.66	4.21	0.66
Sui et al. 2007,Acta Petrologica Sinica		The Northern GXR	The Xing’an Block	51.8792	51.8792	125.794	125.794				GW05112					181											72.25	0.25		15.59		1.33			1.07	0.27	0.04		4.17	4.46	0.06
Sui et al. 2007,Acta Petrologica Sinica		The Northern GXR	The Xing’an Block	52.0064	52.0064	126.213	126.213				GW05085					178											69.164	0.5		15.69		2.78			2.82	1.13	0.06		3.43	3.91	0.16
Sui et al. 2007,Acta Petrologica Sinica		The Northern GXR	The Xing’an Block	51.8205	51.8205	126.272	126.272				GW05120					176											68.62	0.51		16.2		2.71			2.83	0.85	0.04		3.42	4.22	0.18
Sui et al. 2007,Acta Petrologica Sinica		The Northern GXR	The Xing’an Block	50.8947	50.8947	127.083	127.083				GW05129					171											59.21	0.95		17.32		6.76			5.63	3.09	0.09		1.86	4.02	0.25
Wu et al. 2015, IGR		The Northern GXR	The Xing’an-southwestern Songnen Block	49.4	49.4	124.283	124.283				YL3					129											68.49	0.57		16.73				2.41146	2.37	0.92	0.04		2.76	4.47	0.22
Wu et al. 2015, IGR		The Northern GXR	The Xing’an-southwestern Songnen Block	49.4	49.4	124.283	124.283				YL1					128.1											72.77	0.27		15.07				1.44868	1.43	0.58	0.03		3.22	3.98	0.09
Wu et al. 2016, Journal of Jilin University (Earth Science Edition)		The Southern GXR	The Xing’an-southwestern Songnen Block	42.8917	42.8917	117.408	117.408				HS101					157											70.44	0.42		14.07		2.69	0.61	3.03046	0.3	0.27	0.12		5.59	4.38	0.09
Wu et al. 2016, Journal of Jilin University (Earth Science Edition)		The Southern GXR	The Xing’an-southwestern Songnen Block	42.8917	42.8917	117.408	117.408				HS102					157											70.71	0.4		13.55		2.4	0.77	2.92952	0.23	0.31	0.1		7.99	2.62	0.08
Wu et al. 2016, Journal of Jilin University (Earth Science Edition)		The Southern GXR	The Xing’an-southwestern Songnen Block	42.8917	42.8917	117.408	117.408				HS103					157											71.43	0.41		13.51		2.36	0.93	3.05353	0.14	0.28	0.08		6.5	3.4	0.08
Wu et al. 2016, Journal of Jilin University (Earth Science Edition)		The Southern GXR	The Xing’an-southwestern Songnen Block	42.8917	42.8917	117.408	117.408				HS104					157											73.19	0.29		11.67		2.57	0.78	3.09249	0.07	0.15	0.08		9.73	0.43	0.03
Wu et al. 2016, Journal of Jilin University (Earth Science Edition)		The Southern GXR	The Xing’an-southwestern Songnen Block	42.8917	42.8917	117.408	117.408				HS106					157											72.8	0.3		12.18		2.23	0.85	2.85655	0.02	0.11	0.05		10.4	0.38	0.03
Wu et al. 2016, Journal of Jilin University (Earth Science Edition)		The Southern GXR	The Xing’an-southwestern Songnen Block	42.8917	42.8917	117.408	117.408				HS502					157											72.37	0.31		12.41		2.45	1.04	3.24451	0.02	0.12	0.06		9.16	1.36	0.03
Wu et al. 2016, Journal of Jilin University (Earth Science Edition)		The Southern GXR	The Xing’an-southwestern Songnen Block	42.8917	42.8917	117.408	117.408				HS505					157											72.68	0.3		12.17		2.58	0.87	3.19148	0.06	0.13	0.08		9.24	1.12	0.03
Wu et al. 2016, Journal of Jilin University (Earth Science Edition)		The Southern GXR	The Xing’an-southwestern Songnen Block	42.8917	42.8917	117.408	117.408				HS601					157											71.83	0.44		13.32		2.55	1.03	3.32449	0.37	0.29	0.13		4.25	4.99	0.09
Wu et al. 2016, Journal of Jilin University (Earth Science Edition)		The Southern GXR	The Xing’an-southwestern Songnen Block	42.8917	42.8917	117.408	117.408				HS402					157											75.65	0.21		12.02		2.51	0.99	3.2485	0.38	0.05	0.09		4.28	3.36	0.05
Wu et al. 2016, Journal of Jilin University (Earth Science Edition)		The Southern GXR	The Xing’an-southwestern Songnen Block	42.8917	42.8917	117.408	117.408				HS501					157											73.64	0.29		12.21		2.55	1.05	3.34449	0.11	0.15	0.11		5.3	3.86	0.03
Wu et al. 2016, Journal of Jilin University (Earth Science Edition)		The Southern GXR	The Xing’an-southwestern Songnen Block	42.8917	42.8917	117.408	117.408				HS506					157											69.28	0.76		13.21		4.42	1.45	5.42712	0.68	0.36	0.2		6.36	2.48	0.23
Wu et al. 2016, Journal of Jilin University (Earth Science Edition)		The Southern GXR	The Xing’an-southwestern Songnen Block	42.8917	42.8917	117.408	117.408				HS507					157											73.12	0.4		12.79		2.97	1.47	4.14241	0.1	0.07	0.07		4.79	3.51	0.06
Wu et al. 2016, Journal of Jilin University (Earth Science Edition)		The Southern GXR	The Xing’an-southwestern Songnen Block	42.8917	42.8917	117.408	117.408				HS508					157											73.31	0.3		12.33		2.63	1.09	3.45647	0.16	0.15	0.1		5.13	3.9	0.03
Wu et al. 2016, Journal of Jilin University (Earth Science Edition)		The Southern GXR	The Xing’an-southwestern Songnen Block	42.8917	42.8917	117.408	117.408				HS603					156.5											71.43	0.42		13.8		1.99	1.28	3.0706	0.68	0.25	0.14		5.28	3.91	0.12
Xie, 2016, Master's Dissertation		The Southern GXR	The Xing’an-southwestern Songnen Block	42.8711	42.8711	117.394	117.394				ZR201					156.9											74.5	0.25		12.5		2.57	0.5	2.81249	0.13	0.11	0.09		4.55	4.25	0.04
Xie, 2016, Master's Dissertation		The Southern GXR	The Xing’an-southwestern Songnen Block	42.8711	42.8711	117.394	117.394				ZR202					156.9											73.9	0.25		12.6		2.64	0.58	2.95547	0.1	0.12	0.09		6.13	3.11	0.04
Xie, 2016, Master's Dissertation		The Southern GXR	The Xing’an-southwestern Songnen Block	42.8711	42.8711	117.394	117.394				ZR203					156.9											75.8	0.22		12.1		1.85	0.78	2.44463	0.14	0.12	0.09		4.95	3.31	0.03
Xie, 2016, Master's Dissertation		The Southern GXR	The Xing’an-southwestern Songnen Block	42.8711	42.8711	117.394	117.394				ZR204					156.9											74.2	0.25		11.9		2.69	0.6	3.02046	0.17	0.13	0.11		6.44	2.87	0.04
Xie, 2016, Master's Dissertation		The Southern GXR	The Xing’an-southwestern Songnen Block	42.8711	42.8711	117.394	117.394				ZR205					156.9											74.4	0.24		12.2		2.61	0.5	2.84848	0.11	0.07	0.09		5.53	3.75	0.04
Xie, 2016, Master's Dissertation		The Southern GXR	The Xing’an-southwestern Songnen Block	42.8711	42.8711	117.394	117.394				ZR208					156.9											74	0.28		12.4		2.42	0.75	2.92752	0.16	0.1	0.09		5.34	3.85	0.04
Yang et al. 2014, Acta Petrologica Sinica		The Southern GXR	The Xing’an-southwestern Songnen Block	44.3053	44.3053	119.301	119.301				GZ10-65					154											75.57	0.1		12.75				1.16974	0.31	0.1	0.02		4.81	4.24	0.03
Yang et al. 2014, Acta Petrologica Sinica		The Southern GXR	The Xing’an-southwestern Songnen Block	44.1564	44.1564	119.527	119.527				GZ10-57					139											72.34	0.22		14.43				1.45768	0.65	0.23	0.05		4.94	4.75	0.05
Yang et al. 2014, Acta Petrologica Sinica		The Southern GXR	The Xing’an-southwestern Songnen Block	44.5175	44.5175	119.775	119.775				GZ10-49					138											74.58	0.15		12.74				2.01555	0.16	0.05	0.03		4.91	3.77	0.02
Yang et al. 2014, Acta Petrologica Sinica		The Southern GXR	The Xing’an-southwestern Songnen Block	44.5731	44.5731	119.672	119.672				GZ10-52					137											71.8	0.13		14.4				1.8176	0.17	0.09	0.02		5.45	4.47	0.03
Yang et al. 2014, Acta Petrologica Sinica		The Southern GXR	The Xing’an-southwestern Songnen Block	44.8278	44.8278	120.419	120.419				GZ10-28					125											75.85	0.08		12.51				1.12475	0.23	0.08	0.05		4.67	3.95	0.02
Zhang et al. 2006, Acta Petrologica Sinica		The Northern GXR	The Xing’an-southwestern Songnen Block	48.0338	48.0338	122.744	122.744				ZLT04-1					122											60.14	0.77		16.61		2.1	3.53	5.41958	4.3	2.19	0.1		2.78	3.82	0.26
Zhao et al., 2015, Geological Bulletin of China		The Southern GXR	The Xing’an-southwestern Songnen Block	43.2	43.2	117.667	117.667				14RS-1					137.7											78.09	0.13		11.49		1.49	0.39	1.7307	0.16	0.06	0.01		5	2.73	0.01
Zhao et al., 2015, Geological Bulletin of China		The Southern GXR	The Xing’an-southwestern Songnen Block	43.2	43.2	117.667	117.667				14RS-2					137.7											74.5	0.17		13.06		1.9	1.07	2.77962	0.51	0.15	0.02		5.08	3.58	0.04
Zhao et al., 2015, Geological Bulletin of China		The Southern GXR	The Xing’an-southwestern Songnen Block	43.2	43.2	117.667	117.667				14RS-3					137.7											76.79	0.13		12.82		1.2	0.53	1.60976	0.17	0.16	0.03		4.56	2.79	0.02
Zhao et al., 2015, Geological Bulletin of China		The Southern GXR	The Xing’an-southwestern Songnen Block	43.1	43.1	117.7	117.7				14RS-4					137.7											73.75	0.26		12.76		2.17	1.86	3.81257	1.23	0.67	0.03		4.52	3.18	0.07
Zhao et al., 2015, Geological Bulletin of China		The Southern GXR	The Xing’an-southwestern Songnen Block	43.1	43.1	117.783	117.783				14RS-6					137.7											77.27	0.12		12.13		0.58	0.5	1.02188	0.39	0.18	0.02		5.17	3.38	0.03
Zhao et al., 2015, Geological Bulletin of China		The Southern GXR	The Xing’an-southwestern Songnen Block	43.1	43.1	117.783	117.783				14RS-7					137.7											75.02	0.19		12.91		1.57	1.38	2.79269	0.72	0.25	0.02		4.8	3.66	0.05
Zhao et al., 2015, Geological Bulletin of China		The Southern GXR	The Xing’an-southwestern Songnen Block	43.0333	43.0333	117.583	117.583				14RS-8					137.7											78.25	0.14		11.02		1.3	0.96	2.12974	0.35	0.23	0.04		3.9	3.58	0.04
Zhao et al., 2015, Geological Bulletin of China		The Southern GXR	The Xing’an-southwestern Songnen Block	43.05	43.05	117.5	117.5				14RS-9					137.7											69.11	0.42		14.12		3.81	0.94	4.36824	1.28	0.32	0.04		5.26	2.94	0.1
Zhao et al., 2015, Geological Bulletin of China		The Southern GXR	The Xing’an-southwestern Songnen Block	42.9167	42.9167	117.917	117.917				14RS-10					137.7											74.57	0.17		13.26		1.35	0.76	1.97473	0.9	0.27	0.05		4.55	4.01	0.05
Guo et al., 2018, Geol. Bull. China		The Southern GXR	Manketouebo Fm.	44.2752	44.2752	119.761	119.761				KDYQ5	Rhyolite				157.7											77.1	0.17		13.63		1.1			0.05	0.065	0.02		4.91	1.02	0.03
Guo et al., 2018, Geol. Bull. China		The Southern GXR	Manketouebo Fm.	44.2752	44.2752	119.761	119.761				KDYQ6	Rhyolite				157.7											74.56	0.18		13.27		0.76			0.27	0.045	0.03		6.35	2.62	0.03
Guo et al., 2018, Geol. Bull. China		The Southern GXR	Manketouebo Fm.	44.2752	44.2752	119.761	119.761				KDYQ12	Rhyolite				157.7											76.29	0.23		13.25		1.42			0.11	0.258	0.07		3.5	2.49	0.02
Guo et al., 2018, Geol. Bull. China		The Southern GXR	Manketouebo Fm.	44.2752	44.2752	119.761	119.761				KDYQ13	Rhyolite				157.7											74.46	0.19		13.51		1.08			0.3	0.004	0.04		6.41	1.57	0.03
Guo et al., 2018, Geol. Bull. China		The Southern GXR	Manketouebo Fm.	44.2752	44.2752	119.761	119.761				KDYQ14	Rhyolite				157.7											73.49	0.25		14.18		1.41			0.1	0.096	0.03		6.13	0.87	0.05
Guo et al., 2018, Geol. Bull. China		The Southern GXR	Manketouebo Fm.	44.2752	44.2752	119.761	119.761				KDYQ15	Rhyolite				157.7											74.21	0.15		13.73		1.04			0.26	1	0.03		4.53	1.66	0.02
Zhang et al., 2018, Geol. Bull. China		The Southern GXR	Manketouebo Fm.	44.1858	44.1858	119.992	119.992				PM421YQ31	Rhyolite				151.2											76.61	0.15		12.24		0.93	0.22	1.05681	0.32	0.35	0.03		5.63	1.76	0.05
Zhang et al., 2018, Geol. Bull. China		The Southern GXR	Manketouebo Fm.	44.1858	44.1858	119.992	119.992				PM421YQ34	Rhyolite				151.2											75.22	0.18		13.1		1.14	0.29	1.31577	0.41	0.37	0.02		4.97	2.89	0.06
Zhang et al., 2018, Geol. Bull. China		The Southern GXR	Manketouebo Fm.	44.1858	44.1858	119.992	119.992				KD-2	Rhyolite				151.2											75.91	0.19		12.71		1.3	0.27	1.43974	0.19	0.26	0.04		4.86	3.43	0.04
Zhang et al., 2018, Geol. Bull. China		The Southern GXR	Manketouebo Fm.	44.1858	44.1858	119.992	119.992				KD-3	Rhyolite				151.2											77.53	0.15		11.7		0.85	0.27	1.03483	0.08	0.002	0.07		4.79	3.23	0.01
Zhang et al., 2018, Geol. Bull. China		The Southern GXR	Manketouebo Fm.	44.1858	44.1858	119.992	119.992				KD-4	Rhyolite				151.2											76.39	0.16		12.27		0.79	0.54	1.25084	0.23	0.04	0.07		5.48	3.22	0.03
Zhang et al., 2014, Global Geology		The Southern GXR	Manketouebo Fm.	47.8667	47.8667	121.417	121.417				P3-8	Rhyolite				143.4											74.33	0.24		14.04		0.84	0.32	1.07583	0.25	0.25	0.027		4.71	3.89	0.064
Zhang et al., 2014, Global Geology		The Southern GXR	Manketouebo Fm.	47.8667	47.8667	121.417	121.417				P3-7	Rhyolite				143.4											73.91	0.26		14.2		0.79	0.62	1.33084	0.47	0.39	0.058		4.4	3.63	0.068
Zhang et al., 2014, Global Geology		The Southern GXR	Manketouebo Fm.	47.8667	47.8667	121.417	121.417				P3-55	Rhyolite				143.4											80.13	0.07		10.8		0.58	0.07	0.591884	0.14	0.07	0.036		4.02	3.33	0.019
Zhang et al., 2014, Global Geology		The Southern GXR	Manketouebo Fm.	47.875	47.875	121.333	121.333				P4-3	Rhyolite				141.4											77.7	0.13		12.57		0.71	0.19	0.828858	0.18	0.14	0.042		4.42	3.1	0.014
Zhang et al., 2014, Global Geology		The Southern GXR	Manketouebo Fm.	47.875	47.875	121.333	121.333				P4-6	Rhyolite				141.4											79.63	0.1		10.93		0.26	0.07	0.303948	0.09	0.07	0.009		7.03	1.3	0.014
Zhang et al., 2014, Global Geology		The Southern GXR	Manketouebo Fm.	47.875	47.875	121.333	121.333				P4-7	Rhyolite				141.4											77.12	0.13		12.72		0.87	0.19	0.972826	0.16	0.13	0.065		4.25	3.67	0.054
Zhang et al., 2014, Global Geology		The Southern GXR	Manketouebo Fm.	47.875	47.875	121.333	121.333				P4-21	Rhyolite				141.4											77.06	0.2		11.73		1.38	0.14	1.38172	0.07	0.09	0.018		5.52	3.23	0.023
Zhang et al., 2014, Global Geology		The Southern GXR	Manketouebo Fm.	47.875	47.875	121.333	121.333				P4-22	Rhyolite				141.4											76.98	0.28		11.58		1.3	0.38	1.54974	0.76	0.26	0.076		5.18	2.51	0.036
Zhang et al., 2014, Global Geology		The Southern GXR	Manketouebo Fm.	47.875	47.875	121.333	121.333				P4-23	Rhyolite				141.4											78.37	0.2		11.7		1.26	0.13	1.26375	0.09	0.05	0.016		2.8	4.9	0.016
Zhang et al., 2014, Global Geology		The Southern GXR	Manketouebo Fm.	47.875	47.875	121.333	121.333				P4-43	Rhyolite				141.4											70.23	0.38		15.47		1.42	0.41	1.68772	0.94	0.35	0.058		5.49	3.67	0.108
Ge et al., 2000, J. Miner. Petrol.		The Northern GXR		49.25	49.25	120.65	120.65				9448-1					113											55.44	1.66		16.39				8.22417	5.49	1.63	0.11		3.02	4.01	0.79
Ge et al., 2000, J. Miner. Petrol.		The Northern GXR		49.25	49.25	120.65	120.65				9448-2					113											54.94	1.55		15.67				7.59431	6.16	3.28	0.16		2.85	3.8	0.72
Ge et al., 2000, J. Miner. Petrol.		The Northern GXR		49.25	49.25	120.65	120.65				9448-3					113											54.77	1.59		15.87				7.16241	6.53	3	0.13		2.77	3.63	0.75
Ge et al., 2000, J. Miner. Petrol.		The Northern GXR		49.25	49.25	120.65	120.65				9448-4					113											53.57	1.66		16.59				7.31537	6.32	2.62	0.14		2.87	3.84	0.77
Ge et al., 2000, J. Miner. Petrol.		The Northern GXR		49.25	49.25	120.65	120.65				9448-5					113											52.97	1.68		16.24				8.71906	5.72	2.11	0.11		3.11	3.78	0.85
Ge et al., 2000, J. Miner. Petrol.		The Northern GXR		49.25	49.25	120.65	120.65				9448-7					113											52.71	1.75		16.96				8.20618	6.59	2.7	0.12		2.62	3.75	0.89
Ge et al., 2000, J. Miner. Petrol.		The Northern GXR		49.25	49.25	120.65	120.65				950804-8					113											55.85	1.57		15.85				7.6483	6.05	2.79	0.09		2.89	3.97	0.75
Zhang et al., 2017, Journal of Jilin University (Earth Science Edition)		The Northern GXR	The Xing’an-southwestern Songnen Block	46.5089	46.5089	121.68	121.68				DB04-2a					130											73	0.19		13.16		1.35878	0.46	1.68263	1.89	0.39	0.06		4.04	3.52	0.1
Zhang et al., 2017, Journal of Jilin University (Earth Science Edition)		The Northern GXR	The Xing’an-southwestern Songnen Block	46.5089	46.5089	121.68	121.68				DB04-2b					130											73.48	0.23		13.26		1.34316	0.69	1.89858	1.92	0.55	0.07		4.15	3.43	0.08
Zhang et al., 2017, Journal of Jilin University (Earth Science Edition)		The Northern GXR	The Xing’an-southwestern Songnen Block	46.5089	46.5089	121.68	121.68				DB04-2c					130											73.21	0.18		13.33		1.27543	0.49	1.63764	1.63	0.4	0.06		4.14	3.72	0.11
Zhang et al., 2017, Journal of Jilin University (Earth Science Edition)		The Northern GXR	The Xing’an-southwestern Songnen Block	46.5089	46.5089	121.68	121.68				DB04-2d					130											72.8	0.21		12.89		1.31875	0.55	1.73661	1.94	0.46	0.06		4.74	2.87	0.1
Zhang et al., 2017, Journal of Jilin University (Earth Science Edition)		The Northern GXR	The Xing’an-southwestern Songnen Block	46.5089	46.5089	121.68	121.68				DB04-3a					130											60.57	0.74		16.68		3.04708	2.81	5.55177	4.4	2.53	0.11		3.06	4.17	0.22
Zhang et al., 2017, Journal of Jilin University (Earth Science Edition)		The Northern GXR	The Xing’an-southwestern Songnen Block	46.5089	46.5089	121.68	121.68				DB04-3b					130											61.68	0.74		16.5		4.63078	1.34	5.50678	4.08	2.35	0.1		3.43	4.25	0.22
Zhang et al., 2017, Journal of Jilin University (Earth Science Edition)		The Northern GXR	The Xing’an-southwestern Songnen Block	46.5089	46.5089	121.68	121.68				DB04-3c					130											57.38	0.81		17.88		3.90272	2.49	6.00167	4.89	2.67	0.11		3.35	3.98	0.23
Zhang et al., 2017, Journal of Jilin University (Earth Science Edition)		The Northern GXR	The Xing’an-southwestern Songnen Block	46.5089	46.5089	121.68	121.68				DB04-3d					130											60.47	0.74		16.56		3.06042	2.78	5.53377	4.34	2.51	0.11		3.08	4.15	0.22
Zhang et al., 2017, Journal of Jilin University (Earth Science Edition)		The Northern GXR	The Xing’an-southwestern Songnen Block	50.6759	50.6759	121.691	121.691				DB21-1a					130											76.13	0.2		12.68		0.774365	0.32	1.01677	0.46	2.85	0.03		3.9	2.85	0.03
Zhang et al., 2017, Journal of Jilin University (Earth Science Edition)		The Northern GXR	The Xing’an-southwestern Songnen Block	50.6759	50.6759	121.691	121.691				DB21-1b					130											75.23	0.18		11.68		0.687684	0.38	0.998778	1.8	2.97	0.09		3.21	2.97	0.02
Zhang et al., 2017, Journal of Jilin University (Earth Science Edition)		The Northern GXR	The Xing’an-southwestern Songnen Block	50.6759	50.6759	121.691	121.691				DB21-1c					130											75.56	0.2		11.9		0.731025	0.35	1.00778	1.34	3.06	0.06		3.8	3.06	0.03
Zhang et al., 2017, Journal of Jilin University (Earth Science Edition)		The Northern GXR	The Xing’an-southwestern Songnen Block	50.6759	50.6759	121.691	121.691				DB21-1d					130											72.87	0.19		11.86		0.729911	0.36	1.01677	2.63	2.43	0.11		4.61	2.43	0.02
Zhang et al., 2017, Journal of Jilin University (Earth Science Edition)		The Northern GXR	The Xing’an-southwestern Songnen Block	50.6759	50.6759	121.691	121.691				DB21-2a					130											63.43	0.68		12.96		3.25844	1.81	4.74195	3.97	2.24	0.13		4.82	2.24	0.12
Zhang et al., 2017, Journal of Jilin University (Earth Science Edition)		The Northern GXR	The Xing’an-southwestern Songnen Block	50.6759	50.6759	121.691	121.691				DB21-2b					130											62.6	0.62		13.01		2.99287	1.86	4.55299	4.91	2.24	0.15		4.91	2.24	0.12
Zhang et al., 2017, Journal of Jilin University (Earth Science Edition)		The Northern GXR	The Xing’an-southwestern Songnen Block	50.6759	50.6759	121.691	121.691				DB21-2c					130											63.5	0.73		15.6		3.60419	1.04	4.28305	2.39	2.43	0.09		5.1	2.43	0.16
Zhang et al., 2017, Journal of Jilin University (Earth Science Edition)		The Northern GXR	The Xing’an-southwestern Songnen Block	50.6759	50.6759	121.691	121.691				DB21-2d					130											62.65	0.42		13.04		2.55964	1.44	3.74317	5.02	2.31	0.17		4.92	2.31	0.09
Tang et al., 2019, Int. Geol. Rev.		The Central GXR	Manitu Fm.	45.9389	45.9389	121.276	121.276				16W93-1	Andesite				152											61.41	1.01		16.26				5.3898	4.42	1.8	0.12		2.44	4.73	0.25
Tang et al., 2019, Int. Geol. Rev.		The Central GXR	Manitu Fm.	45.6697	45.6697	119.889	119.889				16W127-1	Andesite				151											54.86	1.55		17.28				6.55054	4.24	1.52	0.04		2.87	4.5	0.83
Tang et al., 2019, Int. Geol. Rev.		The Central GXR	Manitu Fm.	45.3828	45.3828	119.78	119.78				16W122-1	Andesite				149											60.53	0.85		15.78				5.43479	4.45	1.35	0.06		2.96	3.71	0.22
Tang et al., 2019, Int. Geol. Rev.		The Central GXR		46.5717	46.5717	121.443	121.443				16W15-1					131											67.7	0.55		15.96				2.90635	1.4	0.31	0.03		3.87	5.08	0.17
Tang et al., 2019, Int. Geol. Rev.		The Central GXR		46.5717	46.5717	121.443	121.443				16W15-2					131											65.13	0.61		17.74				3.29327	1.94	0.54	0.06		4.43	4.93	0.17
Tang et al., 2019, Int. Geol. Rev.		The Central GXR		46.2753	46.2753	121.084	121.084				16W26					151											66.29	0.55		15.84				3.80615	2.46	0.94	0.09		3.81	4.6	0.16
Tang et al., 2019, Int. Geol. Rev.		The Central GXR		45.8158	45.8158	121.113	121.113				16W89					142											63.36	0.53		15.02				4.22906	3.04	0.94	0.08		4	4.47	0.13
Tang et al., 2019, Int. Geol. Rev.		The Central GXR		46.7392	46.7392	121.905	121.905				16W52-1					131											60.73	0.88		16.1				4.84092	2.34	2.75	0.07		3.2	5.55	0.29
Tang et al., 2019, Int. Geol. Rev.		The Central GXR		45.4731	45.4731	121.613	121.613				16W102-1					131											61.71	0.73		16.13				4.97589	3.07	3.04	0.13		2.69	5.01	0.21
Tang et al., 2019, Int. Geol. Rev.		The Central GXR		46.3669	46.3669	122.41	122.41				16W32-1					134											53.19	1.12		20.11				6.78449	6.36	2.61	0.13		1.29	4.39	0.3
Tang et al., 2019, Int. Geol. Rev.		The Central GXR		47.0467	47.0467	122.588	122.588				16ZL11					128											65.04	0.54		16.26				2.95134	2.42	1.02	0.07		3.86	4.39	0.15
Tang et al., 2019, Int. Geol. Rev.		The Central GXR		46.025	46.025	121.399	121.399				16W96					123											63.67	0.68		17.19				4.15708	3.49	1.3	0.12		2.61	5.39	0.24
Tang et al., 2019, Int. Geol. Rev.		The Central GXR		45.5689	45.5689	120.579	120.579				16W135					129											60.75	0.79		17.1				5.03888	4.74	2.17	0.1		3.56	3.71	0.25
Tang et al., 2019, Int. Geol. Rev.		The Central GXR		45.6278	45.6278	120.901	120.901				16W144-2					129											63.11	0.64		16.6				4.42702	3.9	1.65	0.1		3.8	3.78	0.2
Tang et al., 2019, Int. Geol. Rev.		The Central GXR	Manketouebo Fm.	46.1919	46.1919	120.91	120.91				16W64-1	Rhyolite				151											73.25	0.22		14.62				1.25072	0.48	0.36	0.05		3.44	5.05	0.07
Tang et al., 2019, Int. Geol. Rev.		The Central GXR	Manketouebo Fm.	45.8094	45.8094	121.067	121.067				16W88-1	Rhyolite				142											75.17	0.11		13.61				0.917796	0.1	0.08	0.04		4.38	4.11	0.02
Tang et al., 2019, Int. Geol. Rev.		The Central GXR		46.3258	46.3258	121.927	121.927				16W55-1					129											74.69	0.21		12.38				1.38569	0.82	0.38	0.03		5.07	2.34	0.05
Tang et al., 2019, Int. Geol. Rev.		The Central GXR		47.1989	47.1989	122.8	122.8				16ZL08-1					128											74.02	0.12		14.32				1.44868	0.29	0.09	0.02		3.7	5.23	0.01
Tang et al., 2019, Int. Geol. Rev.		The Central GXR		47.1989	47.1989	122.8	122.8				16ZL08-2					128											74.17	0.11		14.09				1.3677	0.25	0.12	0.02		4.34	4.66	0.01
Tang et al., 2019, Int. Geol. Rev.		The Central GXR	Manketouebo Fm.	47.3756	47.3756	121.209	121.209				16ZL54	Rhyolite				150											74.17	0.23		14.56				0.4499	0.2	0.14	0.01		6.09	3.32	0.01
Tang et al., 2019, Int. Geol. Rev.		The Central GXR	Manketouebo Fm.	47.1719	47.1719	121.076	121.076				16ZL57	Trachydacite				142											74.2	0.25		13				1.40369	0.89	0.28	0.12		5.08	3.69	0.03
Zhang et al., 2020, Lithos		The Southern GXR	Xinmin Fm.	44.2706	44.2706	119.989	119.989				2016TW02YQ4	Rhyolite				162											73.3845	0.079		15.2755		0.942619	0.336938	1.18511	0.1655	0.0585	0.0255		0.9395	6.9645	0.014
Zhang et al., 2020, Lithos		The Southern GXR	Xinmin Fm.	44.0706	44.0706	120.007	120.007				XMTW02YQ1	Rhyolite				164											81.004	0.192		11.275		0.76833	0.1797	0.871043	0.357	0.037	0.012		2.169	2.877	0.01
Zhang et al., 2020, Lithos		The Southern GXR	Xinmin Fm.	44.0706	44.0706	120.007	120.007				XMTW02YQ2	Rhyolite				164											78.475	0.203		11.863		0.784478	0.260565	0.966439	0.346	0.048	0.015		3.261	3.779	0.031
Zhang et al., 2020, Lithos		The Southern GXR	Xinmin Fm.	44.0706	44.0706	120.007	120.007				XMTW04YQ1	Rhyolite				164											74.839	0.232		14.355		1.23368	0.372877	1.48295	0.3155	0.0925	0.008		3.253	3.505	0.0245
Zhang et al., 2020, Lithos		The Southern GXR	Xinmin Fm.	44.0711	44.0711	120.01	120.01				XMTW01YQ1	Rhyolite				160											76.889	0.2		12.608		1.19681	0.440265	1.51715	0.385	0.135	0.017		2.629	3.611	0.029
Zhang et al., 2020, Lithos		The Southern GXR	Xinmin Fm.	44.0711	44.0711	120.01	120.01				XMTW01YQ2	Rhyolite				160											78.176	0.179		11.759		2.03163	0.34143	2.16949	0.42	0.196	0.019		1.699	3.621	0.02
Zhang et al., 2020, Lithos		The Southern GXR	Xinmin Fm.	44.3064	44.3064	119.985	119.985				PM416YQ14-1	Rhyolite				164											76.2865	0.1695		14.607		0.87999	0.5391	1.33091	0.068	0.4665	0.027		4.324	0.0925	0.0205
Zhang et al., 2020, Lithos		The Southern GXR	Xinmin Fm.	44.3064	44.3064	119.985	119.985				PM416YQ14-2	Rhyolite				164											77.5185	0.1535		13.596		1.02191	0.224625	1.14414	0.0625	0.4525	0.0215		4.422	0.0695	0.0385
Zhang et al., 2020, Lithos		The Southern GXR	Manketouebo Fm.	44.2283	44.2283	120.837	120.837				WGLTW01YQ1	Rhyolite				154											74.247	0.3		13.186		1.15935	0.73677	1.77996	0.294	0.008	0.058		4.834	4.712	0.155
Zhang et al., 2020, Lithos		The Southern GXR	Manketouebo Fm.	44.2283	44.2283	120.837	120.837				WGLTW01YQ2	Rhyolite				154											73.82	0.305		13.246		1.1344	0.763725	1.78446	0.482	0.073	0.074		4.785	4.717	0.075
Zhang et al., 2020, Lithos		The Southern GXR	Manketouebo Fm.	44.2283	44.2283	120.837	120.837				WGLTW01YQ3	Rhyolite				154											74.239	0.273		13.261		1.09529	0.70083	1.68637	0.454	0.114	0.076		4.756	4.718	0.036
Yang et al., 2015, JAES		The Southern GXR	The Xing’an-southwestern Songnen Block	45.6281	45.6281	120.902	120.902				TW2-1	Andesite				127											61.28	0.76		16.94				5.06587	4.55	1.89	0.1		3.81	3.79	0.25
Yang et al., 2015, JAES		The Southern GXR	The Xing’an-southwestern Songnen Block	45.6281	45.6281	120.902	120.902				TW2-2	Andesite				127											61.25	0.77		16.91				5.08387	4.51	1.91	0.1		3.8	3.8	0.26
Yang et al., 2015, JAES		The Southern GXR	The Xing’an-southwestern Songnen Block	45.5881	45.5881	120.923	120.923				TW3-1	Andesite				129.5											57.29	0.99		17.23				6.36159	5.11	3.17	0.13		1.37	4.58	0.3
Yang et al., 2015, JAES		The Southern GXR	The Xing’an-southwestern Songnen Block	45.5881	45.5881	120.923	120.923				TW3-2	Andesite				129.5											57.35	0.98		17.18				6.32559	5.25	3.27	0.13		1.3	4.42	0.31
Yang et al., 2015, JAES		The Southern GXR	The Xing’an-southwestern Songnen Block	45.5386	45.5386	121.183	121.183				TW4-1	Trachydacite				138.1											64.39	0.61		16.19				4.38203	3.79	1.71	0.08		3.27	4.22	0.19
Yang et al., 2015, JAES		The Southern GXR	The Xing’an-southwestern Songnen Block	45.5386	45.5386	121.183	121.183				TW4-2	Trachydacite				138.1											64.39	0.62		16.22				4.34603	3.81	1.69	0.08		3.24	4.22	0.19
Yang et al., 2015, JAES		The Southern GXR	The Xing’an-southwestern Songnen Block	45.5386	45.5386	121.183	121.183				TW4-3	Trachydacite				138.1											64.18	0.62		16.35				4.37303	3.8	1.7	0.08		3.24	4.3	0.19
Yang et al., 2015, JAES		The Southern GXR	The Xing’an-southwestern Songnen Block	45.6325	45.6325	121.382	121.382				TW9-1	Trachydacite				142.2											63.69	0.76		16.66				4.55299	3.08	1.44	0.06		2.91	4.28	0.26
Yang et al., 2015, JAES		The Southern GXR	The Xing’an-southwestern Songnen Block	45.6325	45.6325	121.382	121.382				TW9-2	Trachydacite				142.2											64.36	0.74		16.53				4.27405	3.06	1.24	0.06		2.93	4.24	0.26
Yang et al., 2015, JAES		The Southern GXR	The Xing’an-southwestern Songnen Block	45.4633	45.4633	120.474	120.474				H13	Rhyolite				127.4											70.39	0.27		14.5				2.72639	0.59	0.43	0.07		5.99	3.87	0.06
Yang et al., 2015, JAES		The Southern GXR	The Xing’an-southwestern Songnen Block	45.4633	45.4633	120.474	120.474				H14	Rhyolite				127.4											69.94	0.29		14.83				2.44746	0.6	0.46	0.07		6.32	3.74	0.06
Yang et al., 2015, JAES		The Southern GXR	The Xing’an-southwestern Songnen Block	45.4633	45.4633	120.474	120.474				H15	Rhyolite				127.4											69.86	0.29		14.95				2.52844	0.74	0.45	0.07		6.22	3.69	0.06
Yang et al., 2015, JAES		The Southern GXR	The Xing’an-southwestern Songnen Block	45.4633	45.4633	120.474	120.474				H16	Rhyolite				127.4											68.92	0.31		15.52				2.7084	0.54	0.45	0.07		5.76	4.44	0.07
Yang et al., 2015, JAES		The Southern GXR	The Xing’an-southwestern Songnen Block	45.4633	45.4633	120.474	120.474				H17	Rhyolite				127.4											69.62	0.28		14.91				2.93335	0.56	0.45	0.07		6.06	3.7	0.06
Yang et al., 2015, JAES		The Southern GXR	The Xing’an-southwestern Songnen Block	45.4633	45.4633	120.474	120.474				H18	Rhyolite				127.4											69.85	0.26		13.84				2.93335	1.61	0.36	0.06		5.17	4.15	0.06
Liu C.F. et al., 2016, Geol.Mag.		The Southern GXR	Ulanhot Region	46.9167	46.9167	122.417	122.417				WS-1					155											63.98	0.75		16.94		2.32	1.99	4.07754	4.35	1.74	0.06		1.82	4.64	0.23
Liu C.F. et al., 2016, Geol.Mag.		The Southern GXR	Ulanhot Region	46.6667	46.6667	122.25	122.25				XH-1					155											77.44	0.08		9.28		1.53	0.65	2.02669	1.19	3.82	0.07		2.22	1.31	0.03
Liu C.F. et al., 2016, Geol.Mag.		The Southern GXR	Ulanhot Region	46.1667	46.1667	121.167	121.167				XL-1					144											62.68	0.54		16.76		2.6	2.4	4.73948	3.69	1.43	0.11		2.96	5.2	0.33
Liu C.F. et al., 2016, Geol.Mag.		The Southern GXR	Ulanhot Region	46.1667	46.1667	121.167	121.167				XL-2					144											62	0.59		16.89		3.11	2.16	4.95838	3.58	1.46	0.13		3.07	5.2	0.37
Liu C.F. et al., 2016, Geol.Mag.		The Southern GXR	Ulanhot Region	46.1667	46.1667	121.167	121.167				XL-3					144											65	0.47		16.04		2.57	2.01	4.32249	2.73	1.08	0.08		3.45	5.2	0.22
Liu C.F. et al., 2016, Geol.Mag.		The Southern GXR	Ulanhot Region	46.2	46.2	121.083	121.083				HP-1					132											71.88	0.21		14.1		1.47	1.05	2.37271	1.12	0.38	0.06		4.4	4.7	0.09
Liu C.F. et al., 2016, Geol.Mag.		The Southern GXR	Ulanhot Region	46.2	46.2	121.083	121.083				HP-2					132											74.48	0.2		12.94		1.43	0.53	1.81671	0.75	0.23	0.04		4.65	3.94	0.05
Liu C.F. et al., 2016, Geol.Mag.		The Southern GXR	Ulanhot Region	46.3333	46.3333	120.667	120.667				WB-1					131											75.85	0.23		12.8		1.21	0.24	1.32876	0.12	0.3	0.07		4.69	2.45	0.02
Liu C.F. et al., 2016, Geol.Mag.		The Southern GXR	Ulanhot Region	46.3333	46.3333	120.667	120.667				WB-2					130											74.14	0.21		13.41		1.17	0.41	1.46277	0.64	0.31	0.05		4.88	3.52	0.05
Liu C.F. et al., 2016, Geol.Mag.		The Southern GXR	Ulanhot Region	46.3333	46.3333	120.667	120.667				WB-3					130											74.8	0.27		13.28		1.42	0.19	1.46772	0.32	0.3	0.08		4.14	4.25	0.05
Liu C.F. et al., 2016, Geol.Mag.		The Southern GXR	Ulanhot Region	46.3333	46.3333	120.667	120.667				WB-4					130											74.13	0.22		13.42		1.41	0.26	1.52872	0.56	0.33	0.05		4.97	3.49	0.05
Liu C.F. et al., 2016, Geol.Mag.		The Southern GXR	Ulanhot Region	46.3333	46.3333	120.667	120.667				WB-5					130											74.63	0.26		13.17		1.5	0.17	1.5197	0.35	0.27	0.04		4.28	4.35	0.08
Liu C.F. et al., 2016, Geol.Mag.		The Southern GXR	Ulanhot Region	46.3333	46.3333	120.667	120.667				WB-6					130											75.85	0.24		12.47		1.04	0.41	1.34579	0.65	0.27	0.06		4.4	3.81	0.06
Liu C.F. et al., 2016, Geol.Mag.		The Southern GXR	Ulanhot Region	46.9167	46.9167	122.083	122.083				BG-1					126											77.73	0.06		12.35		0.6	0.07	0.60988	0.37	0.04	0.03		4.28	3.98	0.01
Liu C.F. et al., 2016, Geol.Mag.		The Southern GXR	Ulanhot Region	46.9167	46.9167	122.083	122.083				BG-2					126											76.16	0.11		12.81		1.22	0.02	1.11776	0.22	0.04	0.08		4.55	3.99	0.03
Liu C.F. et al., 2016, Geol.Mag.		The Southern GXR	Ulanhot Region	46.9167	46.9167	122.083	122.083				BG-3					126											77.84	0.08		12.32		0.64	0.07	0.645872	0.31	0.04	0.01		4.66	3.65	0.01
Liu C.F. et al., 2016, Geol.Mag.		The Southern GXR	Ulanhot Region	46.9167	46.9167	122.083	122.083				BG-4					126											78.48	0.06		12.05		0.33	0.17	0.466934	0.21	0.03	0.01		4.62	3.7	0.01
Liu C.F. et al., 2016, Geol.Mag.		The Southern GXR	Ulanhot Region	46.1667	46.1667	122.667	122.667				XE-1					126											47.74	1.29		17.69		4.01	5.34	8.9482	8.97	8.14	0.16		0.56	3.36	0.29
Liu C.F. et al., 2016, Geol.Mag.		The Southern GXR	Ulanhot Region	46.1667	46.1667	122.667	122.667				XE-2					126											46.14	2.42		16.27		6.07	7.33	12.7918	8.52	5.56	0.23		0.75	3.82	0.84
Liu C.F. et al., 2016, Geol.Mag.		The Southern GXR	Ulanhot Region	46.1667	46.1667	122.667	122.667				XE-3					126											48	1.5		18.57		5.79	4.22	9.42984	8.39	5.78	0.14		0.87	3.75	0.56
Liu et al., 2017, Geological Journal		The Central GXR	Manketouebo Fm.	46.2083	46.2083	120.942	120.942				SQG‐1YQ1	Dacite	151	166		158.5											71.9	0.41		14.33		2.72	0.22	2.66746	0.35	0.49	0.04		3.51	4.32	0.09
Liu et al., 2017, Geological Journal		The Central GXR	Manketouebo Fm.	46.2083	46.2083	120.942	120.942				SQG‐1YQ2	Dacite	151	166		158.5											71.62	0.38		13.87		2.71	0.12	2.55846	0.35	0.43	0.02		4.62	4.12	0.1
Liu et al., 2017, Geological Journal		The Central GXR	Manketouebo Fm.	46.2083	46.2083	120.942	120.942				1YQ1	Dacite	151	166		158.5											68.58	0.57		15.76		1.12	1.34	2.34778	1.68	0.42	0.11		4.54	4.6	0.16
Liu et al., 2017, Geological Journal		The Central GXR	Manketouebo Fm.	46.2083	46.2083	120.942	120.942				SL07‐YQ1	Dacite	151	166		158.5											74.9	0.32		13.13		0.77	0.99	1.68285	0.34	0.28	0.03		4.57	3.8	0.04
Liu et al., 2017, Geological Journal		The Central GXR	Manketouebo Fm.	46.2083	46.2083	120.942	120.942				SL07‐YQ2	Dacite	151	166		158.5											73.91	0.4		13.79		1.22	0.7	1.79776	0.39	0.25	0.03		3.88	4.82	0.07
Liu et al., 2017, Geological Journal		The Central GXR	Manketouebo Fm.	46.2083	46.2083	120.942	120.942				SL07‐YQ3	Dacite	151	166		158.5											72.44	0.42		14.36		1.21	0.84	1.92876	0.29	0.32	0.04		4.44	4.3	0.07
Liu et al., 2017, Geological Journal		The Central GXR	Tamulangou Fm.	46.2083	46.2083	120.942	120.942				SL09‐YQ1	Basaltic Andesite	151	166		158.5											51.81	1		20.29		3.9	3.11	6.61922	0.15	3.11	7.26		0.14	6.42	0.3
Liu et al., 2017, Geological Journal		The Central GXR	Tamulangou Fm.	46.2083	46.2083	120.942	120.942				SL10‐YQ2	Basaltic Andesite	151	166		158.5											54.53	0.97		16		1.57	5.51	6.92269	0.43	4.78	6.23		0.12	2.7	0.22
Liu et al., 2017, Geological Journal		The Central GXR	Tamulangou Fm.	46.2083	46.2083	120.942	120.942				SL10‐YQ3	Basaltic Andesite	151	166		158.5											54.57	0.97		16.18		2.58	4.4	6.72148	0.42	4.55	6.68		0.12	2.53	0.21
Liu et al., 2017, Geological Journal		The Central GXR	Tamulangou Fm.	46.2083	46.2083	120.942	120.942				SL10‐YQ4	Basaltic Andesite	151	166		158.5											55.64	0.96		16.6		3.18	3.39	6.25136	0.45	4.3	6.52		0.12	3.71	0.22
Li et al., 2016, Global Geology		The Southern GXR	Manketouebo Fm.	44.0583	44.0583	118.317	118.317				W1YQ-1	Rhyolite	151	166		158.5											77.8	0.11		11.35		1.42			0.05	0.1	0.02		7.7	0.1	0.02
Li et al., 2016, Global Geology		The Southern GXR	Manketouebo Fm.	44.0583	44.0583	118.317	118.317				W2YQ-1	Rhyolite	151	166		158.5											75.8	0.11		12.3		1.47			0.08	0.13	0.02		8.92	0.12	0.02
Li et al., 2016, Global Geology		The Southern GXR	Manketouebo Fm.	44.0583	44.0583	118.317	118.317				W3YQ-1	Rhyolite	151	166		158.5											71.3	0.19		14.75		1.69			0.04	0.05	0.01		6.94	3.73	0.03
Li et al., 2016, Global Geology		The Southern GXR	Manketouebo Fm.	44.0583	44.0583	118.317	118.317				W4YQ-1	Rhyolite	151	166		158.5											80.1	0.07		10.35		1.52			0.15	0.3	0.02		5.35	0.26	0.02
Li et al., 2016, Global Geology		The Southern GXR	Manketouebo Fm.	44.0583	44.0583	118.317	118.317				W5YQ-1	Rhyolite	151	166		158.5											71.2	0.19		14.8		1.66			0.07	0.08	0.01		8	2.9	0.03
Zhang et al., 2008, Chemical Geology		The Northern GXR		52.325	52.325	124.678	124.678				05TH05					124											53.63	1.08		18.6		5.3	2.93	7.69894	5.48	3.57	0.14		3.14	3.3	0.32
Zhang et al., 2008, Chemical Geology		The Northern GXR		52.3789	52.3789	124.688	124.688				05TH10					123.7											47.34	1.51		17.89		4.69	5.99	10.2101	9.5	6.01	0.17		1.25	3.03	0.44
Zhang et al., 2008, Chemical Geology		The Northern GXR		52.4617	52.4617	124.642	124.642				05TH11					124											47.78	1.33		17.44		3.7	6.38	9.70926	9.11	6.92	0.16		1.46	3.17	0.37
Zhang et al., 2008, Chemical Geology		The Northern GXR		52.5717	52.5717	124.559	124.559				05TH19					124											52.87	1.09		16.27		5.33	2.53	7.32593	7.13	4.96	0.09		1.87	4.22	0.31
Zhang et al., 2008, Chemical Geology		The Northern GXR		52.5717	52.5717	124.559	124.559				05TH21					122.3											52.93	1.1		16.16		5.14	2.71	7.33497	7.19	5.15	0.11		1.88	4.35	0.29
Zhang et al., 2008, Chemical Geology		The Northern GXR		52.6606	52.6606	124.327	124.327				05TH23					124											54.59	1.04		17.76		4.93	4.23	8.66601	7.08	4.4	0.14		1.72	2.74	0.34
Zhang et al., 2008, Chemical Geology		The Northern GXR		52.6606	52.6606	124.344	124.344				05TH25					125.6											52.65	1.48		16.19		5.74	3.75	8.91485	7.62	3.23	0.12		2.05	3.08	0.59
Zhang et al., 2008, Chemical Geology		The Northern GXR		52.6606	52.6606	124.361	124.361				05TH26					124											52.62	1.52		16.28		5.28	3.19	7.94094	7.99	3.37	0.12		2.08	3.2	0.61
Zhang et al., 2008, Chemical Geology		The Northern GXR		52.6606	52.6606	124.378	124.378				05TH27					124											53.47	1.56		16.27		5.87	2.52	7.80183	6.83	3.6	0.1		2.15	3.95	0.64
Zhang et al., 2008, Chemical Geology		The Northern GXR		49.8422	49.8422	119.959	119.959				EBY04-1					140											52.63	1.33		16.04		6.47	3.18	9.00171	6.37	4.4	0.11		3.02	3.84	0.63
Zhang et al., 2008, Chemical Geology		The Northern GXR		49.8422	49.8422	119.959	119.959				EBY04-2					140											55.6	1.32		16.19		4.77	2.75	7.04205	4.68	4.21	0.12		3.08	3.84	0.64
Zhang et al., 2008, Chemical Geology		The Northern GXR		49.8464	49.8464	119.96	119.96				EBY04-3					140
Zhang et al., 2008, Chemical Geology		The Northern GXR		49.8464	49.8464	119.96	119.96				EBY04-4					140											55.83	1.27		15.9		5	2.7	7.199	4.74	3.02	0.09		3.79	3.62	0.58
Zhang et al., 2008, Chemical Geology		The Northern GXR		49.8422	49.8422	119.959	119.959				ER04-7		106	140		123											52.87	1.13		16.87		6.36	2.7	8.42273	5.83	4.59	0.12		2.92	3.64	0.47
Zhang et al., 2008, Chemical Geology		The Northern GXR		50.4006	50.4006	120.201	120.201				ESH04-2		106	140		123											55.56	1.17		18.38		4.65	3.06	7.24407	3.27	2.71	0.07		2.14	6.13	0.41
Zhang et al., 2008, Chemical Geology		The Northern GXR		50.3589	50.3589	120.447	120.447				GH04-1					124											49.76	1.68		17.37		5.05	3.82	8.36399	7.94	5.27	0.16		2.23	3.54	0.56
Zhang et al., 2008, Chemical Geology		The Northern GXR		50.7486	50.7486	121.039	121.039				GH04-3		115	124		119.5											54.47	1.16		16.13		6.97	2.57	8.84161	4.37	4.49	0.16		3.19	3.75	0.38
Zhang et al., 2008, Chemical Geology		The Northern GXR		50.9881	50.9881	121.321	121.321				GH04-4					115											53.85	1.3		17.57		4.3	3.58	7.44914	3.9	4.54	0.17		3.46	5.01	0.38
Zhang et al., 2008, Chemical Geology		The Northern GXR		50.375	50.375	124.224	124.224				JGD04-3					115											54.01	1.05		16.87		4.83	3.95	8.29603	6.41	4.87	0.14		1.23	3.3	0.34
Zhang et al., 2008, Chemical Geology		The Northern GXR		49.9481	49.9481	124.38	124.38				JGD04-4					115											48.55	1.21		15.99		4.04	5.21	8.84519	8.97	7.55	0.15		1.93	2.84	0.52
Zhang et al., 2008, Chemical Geology		The Northern GXR		43.9292	43.9292	119.446	119.446				LD-05					131											53.68	0.93		18.78		6.78	2.89	8.99064	9.47	3.04	0.19		0.49	3.03	0.27
Zhang et al., 2008, Chemical Geology		The Northern GXR		43.9292	43.9292	119.446	119.446				LD-06					131											53.46	0.93		17.77		6.84	3.35	9.50463	9.87	3.72	0.19		0.36	3.16	0.26
Zhang et al., 2008, Chemical Geology		The Northern GXR		43.9294	43.9294	119.436	119.436				LD-10					131											53.14	0.89		18.04		6.34	3.46	9.16473	9.2	3.5	0.18		0.45	3.38	0.24
Zhang et al., 2008, Chemical Geology		The Northern GXR		44.4489	44.4489	120.801	120.801				MAN-1		121	131		126											56.84	1.01		16.57		2.43	5.97	8.15651	6.35	3.9	0.13		1.49	3.59	0.26
Zhang et al., 2008, Chemical Geology		The Northern GXR		44.4489	44.4489	120.8	120.8				MAN-2		121	131		126											56.71	0.96		16.82		3.03	4.62	7.34639	6.34	3.81	0.13		2.01	3.44	0.25
Zhang et al., 2008, Chemical Geology		The Northern GXR		44.4506	44.4506	120.797	120.797				MAN-3		121	131		126											56.76	1.02		16.39		2.17	5.51	7.46257	6.38	4.03	0.13		1.87	3.37	0.26
Zhang et al., 2008, Chemical Geology		The Northern GXR		43.8761	43.8761	118.894	118.894				XFZH-04					121											51.02	1.46		16.89		5.67	2.76	7.86187	8.39	6.89	0.15		1.07	3.67	0.48
Zhang et al., 2008, Chemical Geology		The Northern GXR		44.315	44.315	117.652	117.652				XW04-1					121.5											54.57	1.94		15.5		3.74	5.28	8.64525	6.14	3.4	0.15		2.47	3.43	0.74
Zhang et al., 2008, Chemical Geology		The Northern GXR		44.315	44.315	117.645	117.645				XW04-4					121.5											52.58	2.23		15.4		4.67	5.95	10.1521	6.52	3.73	0.17		2.24	3.54	1.01
Zhang et al., 2008, Chemical Geology		The Northern GXR		49.2061	49.2061	120.95	120.95				YK04-1					114											52.81	1.92		15.22		4.21	5.59	9.37816	6.29	4.05	0.18		2.87	3.22	1.07
Zhang et al., 2008, Chemical Geology		The Northern GXR		49.2061	49.2061	120.95	120.95				YK04-3					115											53.03	1.93		15.41		3.61	6.25	9.49828	6.31	4.18	0.16		2.8	3.24	1.05
Zhang et al., 2008, Chemical Geology		The Northern GXR		49.2061	49.2061	120.616	120.616				YK04-4					116											53.39	1.95		15.35		4.65	5.59	9.77407	6.26	3.86	0.19		2.77	3.44	1.07
Zhang et al., 2008, Chemical Geology		The Northern GXR		48.8464	48.8464	121.583	121.583				YKS04-3					106											53.38	1.98		15.32		5.45	3.65	8.55391	7.13	4.14	0.13		1.86	3.58	1.06
Zhang et al., 2008, Chemical Geology		The Northern GXR		44.7533	44.7533	121.131	121.131				ZHJ04-1					122.8											56.8	1.06		16.87		6.17	2.61	8.16177	5.35	3.48	0.18		2.35	3.81	0.23
Zhang et al., 2008, Chemical Geology		The Northern GXR		44.7533	44.7533	121.131	121.131				ZHJ04-4					122.8											56.33	0.96		16.79		6.23	2.43	8.03575	5.28	3.69	0.11		2.43	3.78	0.22
Zhang et al., 2008, Chemical Geology		The Northern GXR		48.0236	48.0236	123.006	123.006				ZLT04-10					122											52.03	1.05		16.74		6.3	4.8	10.4687	5.4	5.28	0.14		1.78	4.36	0.32
Zhang et al., 2008, Chemical Geology		The Northern GXR		48.005	48.005	122.806	122.806				ZLT04-9					122											53.97	0.99		16.49		6.19	3.99	9.55976	7.16	4.23	0.12		1.53	3.12	0.3
Yang et al., 2022, JAES		The Southern GXR		44.1833	44.1833	116.625	116.625				MD1					133											77.48	0.14		11.89		0.8	0.25	0.96984	0.63	0.17	–		5	3.47	0.04
Yang et al., 2022, JAES		The Southern GXR		44.1833	44.1833	116.625	116.625				MD2					133											76.83	0.16		12.06		0.89	0.35	1.15082	0.65	0.18	0.01		5.03	3.52	0.03
Yang et al., 2022, JAES		The Southern GXR		44.1833	44.1833	116.625	116.625				MD3					133											77.19	0.13		11.87		0.43	0.35	0.736914	0.65	0.18	0.01		5.12	3.33	0.04
Yang et al., 2022, JAES		The Southern GXR		44.1833	44.1833	116.625	116.625				MD4					133											76.87	0.15		11.87		0.87	0.29	1.07283	0.67	0.18	0.01		4.97	3.34	0.03
Yang et al., 2022, JAES		The Southern GXR		44.1833	44.1833	116.625	116.625				MD5					133											77.11	0.13		12.13		0.5	0.25	0.6999	0.62	0.16	0.01		5.09	3.48	0.03
Yang et al., 2022, JAES		The Southern GXR		44.1833	44.1833	116.625	116.625				MD6					133											78.08	0.13		11.46		0.5	0.15	0.5999	0.46	0.25	–		6.49	1.65	0.04
Yang et al., 2022, JAES		The Southern GXR		44.1833	44.1833	116.625	116.625				MD7					133											78.44	0.17		10.73		0.47	0.31	0.732906	0.43	0.31	–		6.29	1.48	0.05
Yang et al., 2022, JAES		The Southern GXR		44.1833	44.1833	116.625	116.625				MD8					133											77.42	0.13		11.43		0.51	0.35	0.808898	0.53	0.27	–		5.97	1.99	0.04
Yang et al., 2022, JAES		The Southern GXR		44.1833	44.1833	116.625	116.625				MD9					133											77.67	0.15		11.13		0.4	0.39	0.74992	0.46	0.28	–		6.19	1.71	0.04
Yang et al., 2022, JAES		The Southern GXR		44.1833	44.1833	116.625	116.625				MD10					134											73.68	0.28		12.93		1.83	0.53	2.17663	0.64	0.31	0.02		5.35	3.5	0.08
Yang et al., 2022, JAES		The Southern GXR		44.1833	44.1833	116.625	116.625				MD11					134											71.12	0.39		13.56		2.24	1.05	3.06555	1.13	0.35	0.04		5.35	3.95	0.11
Yang et al., 2022, JAES		The Southern GXR		44.1833	44.1833	116.625	116.625				MD12					134											75.35	0.24		12.63		1.07	0.3	1.26279	0.69	0.19	0.09		5.11	3.87	0.07
Yang et al., 2022, JAES		The Southern GXR		44.1833	44.1833	116.625	116.625				MD13					134											73.8	0.29		12.86		1.85	0.49	2.15463	0.63	0.3	0.02		5.35	3.49	0.08
Yang et al., 2022, JAES		The Southern GXR		44.1833	44.1833	116.625	116.625				MD14					134											71.05	0.39		13.48		1.82	1.43	3.06764	1.12	0.35	0.04		5.36	3.93	0.11
Xie et al., 2021, Geological Magazine		The Southern GXR		42.4167	42.4167	114.5	114.5				WL-5					148.1											74.55	0.13		13.64				1.19	0.66	0.18	0.04		5.05	3.48	0.03
Xie et al., 2021, Geological Magazine		The Southern GXR		42.4167	42.4167	114.5	114.5				WL-19					148.1											73.77	0.14		13.64				1.23	0.74	0.19	0.04		5.49	3.65	0.04
Xie et al., 2021, Geological Magazine		The Southern GXR		42.4167	42.4167	114.5	114.5				WL-23					148.1											74.78	0.12		13.52				1.13	0.62	0.16	0.04		5.21	3.56	0.02
Xie et al., 2021, Geological Magazine		The Southern GXR		42.4167	42.4167	114.5	114.5				WL-25					148.1											73.73	0.15		13.82				1.31	0.79	0.21	0.03		5.39	3.73	0.05
Xie et al., 2021, Geological Magazine		The Southern GXR		42.4167	42.4167	114.5	114.5				WL-26-1					148.1											75.65	0.09		12.86				0.97	0.46	0.12	0.05		4.87	3.67	0.02
Xie et al., 2021, Geological Magazine		The Southern GXR		42.4167	42.4167	114.5	114.5				WL-27					148.1											75.48	0.09		12.92				1.03	0.56	0.14	0.05		4.76	3.65	0.02
Xie et al., 2021, Geological Magazine		The Southern GXR		42.4167	42.4167	114.5	114.5				WL-6					149.8											75.03	0.09		13.14				1.04	0.59	0.14	0.03		4.94	3.53	0.02
Xie et al., 2021, Geological Magazine		The Southern GXR		42.4167	42.4167	114.5	114.5				WL-7-2					149.8											74.97	0.09		13.16				1.06	0.6	0.15	0.04		5.09	3.39	0.02
Xie et al., 2021, Geological Magazine		The Southern GXR		42.4167	42.4167	114.5	114.5				WL-8-2					149.8											74.65	0.12		13.52				1.14	0.65	0.17	0.03		5.09	3.31	0.02
Xie et al., 2021, Geological Magazine		The Southern GXR		42.4167	42.4167	114.5	114.5				WL-17					149.8											74.32	0.14		13.64				1.21	0.72	0.18	0.05		4.99	3.55	0.03
Xie et al., 2021, Geological Magazine		The Southern GXR		42.4167	42.4167	114.5	114.5				WL-18					149.8											74.89	0.1		13.42				1.1	0.61	0.16	0.04		4.98	3.44	0.02
Xie et al., 2021, Geological Magazine		The Southern GXR		42.4167	42.4167	114.5	114.5				WL-26-2					149.8											74.55	0.13		13.58				1.17	0.66	0.17	0.04		4.97	3.57	0.02
Feng et al., 2020, Lithos		The Northern GXR		51.65	51.65	124.392	124.392				ZK6280-1-80	Granodiorite porphyry				148.9											67.55	0.51		15.8				3.26627	2.34	1.14	0.03		3.16	4.92	0.19
Feng et al., 2020, Lithos		The Northern GXR		51.65	51.65	124.392	124.392				ZK6280-1-84	Granodiorite porphyry				148.9											63.68	0.74		16.36				4.01311	3.7	1.79	0.06		2.82	5.09	0.27
Feng et al., 2020, Lithos		The Northern GXR		51.65	51.65	124.392	124.392				ZK6280-1-99	Diorite				149.4											54.83	1.03		17.62				6.51455	5.79	3.32	0.11		2.24	4.46	0.39
Feng et al., 2020, Lithos		The Northern GXR		51.65	51.65	124.392	124.392				ZK6280-1-75	Diorite				149.4											56.04	1.08		17.44				6.95545	3.28	3.81	0.12		1.18	6.98	0.41
Feng et al., 2020, Lithos		The Northern GXR		51.65	51.65	124.392	124.392				ZK6280-1-117	Monzonite				146.9											55.67	0.93		19				5.79471	6.24	1.97	0.1		2.47	4.4	0.33
Feng et al., 2020, Lithos		The Northern GXR		51.65	51.65	124.392	124.392				ZK6280-1-120	Monzonite				146.9											55.34	0.92		18.7				6.01066	6.42	2.01	0.1		2.3	4.42	0.33
Feng et al., 2020, Lithos		The Northern GXR		51.65	51.65	124.392	124.392				ZK6280-1-121	Monzonite				146.9											55.3	0.93		18.76				5.8577	6.39	2.02	0.1		2.29	4.49	0.32
Feng et al., 2020, Lithos		The Northern GXR		51.65	51.65	124.392	124.392				ZK6260-5-1	Gabbro				140.6											52.02	1.05		18.22				7.82826	6.42	4.13	0.13		1.72	3.99	0.32
Feng et al., 2020, Lithos		The Northern GXR		51.65	51.65	124.392	124.392				ZK6260-5-2	Gabbro				140.6											51.73	1.04		18				7.83726	7.43	4.09	0.13		1.77	3.23	0.34
Feng et al., 2020, Lithos		The Northern GXR		51.65	51.65	124.392	124.392				ZK6260-5-3	Gabbro				140.6											52.13	1.04		17.84				7.6303	7.27	3.86	0.12		1.98	3.36	0.36
Feng et al., 2020, Lithos		The Northern GXR		51.65	51.65	124.392	124.392				ZK6280-1-53	Monzonite porphyry				139.9											60.62	0.89		16.79				4.87692	3.21	1.58	0.11		3.91	4.73	0.36
Feng et al., 2020, Lithos		The Northern GXR		51.65	51.65	124.392	124.392				ZK6240-1-14	Monzonite porphyry				139.9											60.9	0.88		16.88				4.86792	3.37	1.6	0.11		3.83	4.89	0.36
Feng et al., 2020, Lithos		The Northern GXR		51.65	51.65	124.392	124.392				ZK6160-1-88	Monzonite porphyry				139.9											60.37	0.85		16.66				4.84092	3.21	1.61	0.1		3.56	4.43	0.36
Feng et al., 2020, Lithos		The Northern GXR		51.65	51.65	124.392	124.392				ZK6160-1-94	Monzonite porphyry				139.9											60.46	0.88		17.03				4.67896	2.67	1.66	0.1		2.47	6.51	0.36
Cheng et al., 2014, Acta Petrol. Miner.		The Central GXR	Manketouebo Fm.	45.7083	45.7083	116.7	116.7				PM 3 -4	Rhyolite				161											73.27	0.23		13.89		0.94	0.41	1.25581	1.08	0.36	0.02		5.59	2.93	0.06
Cheng et al., 2014, Acta Petrol. Miner.		The Central GXR	Manketouebo Fm.	45.7083	45.7083	116.7	116.7				PM3 -12	Rhyolite				161											77.57	0.25		12.26		0.53	0.12	0.596894	0.16	0.17	0.01		5.3	2.43	0.05
Cheng et al., 2014, Acta Petrol. Miner.		The Central GXR	Manketouebo Fm.	45.7083	45.7083	116.7	116.7				PM3-13	Rhyolite				161											73.37	0.29		14.18		0.85	0.14	0.90483	0.2	0.19	0.01		5.65	3.41	0.19
Cheng et al., 2014, Acta Petrol. Miner.		The Central GXR	Manketouebo Fm.	45.7083	45.7083	116.7	116.7				PM 3 -17	Rhyolite				161											74.93	0.28		13.55		0.53	0.14	0.616894	0.41	0.28	0.01		5.37	1.9	0.02
Cheng et al., 2014, Acta Petrol. Miner.		The Central GXR	Manketouebo Fm.	45.7083	45.7083	116.7	116.7				PM3 -28	Rhyolite				161											73.4	0.29		14.01		1.16	0.24	1.28377	0.31	0.24	0.01		5.38	3.12	0.07
Cheng et al., 2014, Acta Petrol. Miner.		The Central GXR	Manketouebo Fm.	45.7083	45.7083	116.7	116.7				PM3-37	Rhyolite				161											77.4	0.15		11.99		0.79	0.12	0.830842	0.23	0.13	0.03		4.64	3.55	0.05
Cheng et al., 2014, Acta Petrol. Miner.		The Central GXR	Manketouebo Fm.	45.7083	45.7083	116.7	116.7				PM6 -4	Trachyte				161											62.09	0.68		17.36		1.98	1.41	3.1916	2.46	1.08	0.09		5.24	4.23	0.22
Cheng et al., 2014, Acta Petrol. Miner.		The Central GXR	Manketouebo Fm.	45.7067	45.7067	116.657	116.657				5140-1	Rhyolite				161											71.18	0.15		13.56		0.92	0.56	1.38782	1.4	0.28	0.02		5.83	3.03	0.08
Cheng et al., 2014, Acta Petrol. Miner.		The Central GXR	Manketouebo Fm.	45.7067	45.7067	116.657	116.657				5203-1	Rhyolite				155.5											69.56	0.3		15.52		1.66	0.31	1.80367	0.44	0.39	0.03		5.94	4.34	0.08
Cheng et al., 2014, Acta Petrol. Miner.		The Central GXR	Manketouebo Fm.	45.6806	45.6806	116.693	116.693				5207-1	Rhyolite				161											76.14	0.16		12.61		0.65	0.65	1.23487	0.24	0.33	0.06		4.56	3.82	0.03
Cheng et al., 2014, Acta Petrol. Miner.		The Central GXR	Manketouebo Fm.	45.6806	45.6806	116.693	116.693				5211-1	Rhyolite				161											77.34	0.11		12.64		0.13	0.13	0.246974	0.46	0.1	0.04		4.35	3.97	0.02
Cheng et al., 2014, Acta Petrol. Miner.		The Central GXR	Manketouebo Fm.	45.6806	45.6806	116.693	116.693				5213-1	Rhyolite				161											68.88	0.41		16.32		0.47	0.22	0.642906	1.28	0.13	0.01		6.24	3.89	0.05
Cheng et al., 2014, Acta Petrol. Miner.		The Central GXR	Manketouebo Fm.	45.6806	45.6806	116.693	116.693				5215-2	Rhyolite				164											76.4	0.06		12.44		0.21	0.5	0.688958	0.88	0.14	0.12		5.5	2.24	0.02
Cheng et al., 2013, Acta Geol. Sin.		The Central GXR	Manketouebo Fm.	46.4572	46.4572	119.237	119.237				1952-1	Rhyolite				174											74.4	0.16		13.67		1.09	0.16	1.14078	0.63	0.09	0.02		4.54	3.77	0.05
Cheng et al., 2013, Acta Geol. Sin.		The Central GXR	Manketouebo Fm.	46.5	46.5	119	119				8414-1	Rhyolite				162											69.12	0.53		15.5		1.32	0.76	1.94774	0.71	0.46	0.06		4.31	4.68	0.13
Cheng et al., 2013, Acta Geol. Sin.		The Central GXR	Manketouebo Fm.	46.5	46.5	119	119				P529-1	Rhyolite				162											70.75	0.37		14.92		1.52	0.32	1.6877	0.52	0.47	0.02		5.88	2.67	0.14
Cheng et al., 2013, Acta Geol. Sin.		The Central GXR	Manketouebo Fm.	46.5664	46.5664	119.103	119.103				3451-1	Rhyolite				162.3											74.76	0.18		13.27		1.05	0.41	1.35479	0.31	0.3	0.06		4.78	3.43	0.05
Cheng et al., 2013, Acta Geol. Sin.		The Central GXR	Manketouebo Fm.	46.5	46.5	119	119				P615-1	Tuff				162.3											77.38	0.08		12.27		0.18	0.1	0.261964	0.27	0.17	0.01		4.83	2.74	0.04
Cheng et al., 2013, Acta Geol. Sin.		The Central GXR	Manketouebo Fm.	46.5	46.5	119	119				P537-1	Rhyolite				162.3											78.82	0.04		11.66		0.33	0.11	0.406934	0.23	0.06	0.01		4.87	2.67	0.01
Cheng et al., 2013, Acta Geol. Sin.		The Central GXR	Manketouebo Fm.	46.5	46.5	119	119				P437-1	Tuff				162.3											76.3	0.02		13.25		0.43	0.22	0.606914	0.27	0.13	0.05		3.9	3.83	0.02
Cheng et al., 2013, Acta Geol. Sin.		The Central GXR	Manketouebo Fm.	46.5	46.5	119	119				P536-1	Tuff				162.3											74.04	0.12		13.9		0.72	0.22	0.867856	0.31	0.14	0.08		5.05	3.4	0.04
Cheng et al., 2013, Acta Geol. Sin.		The Central GXR	Manketouebo Fm.	46.5	46.5	119	119				P66-1	Rhyolite				162.3											77.18	0.07		12.03		0.78	0.29	0.991844	0.19	0.21	0.05		5.46	1.8	0.04
Cheng et al., 2013, Acta Geol. Sin.		The Central GXR	Manketouebo Fm.	46.3561	46.3561	118.978	118.978				P552-3	Tuff				165.6											76.72	0.1		13.08		0.4	0.17	0.52992	0.13	0.14	0.02		4.42	3.68	0.02
Cheng et al., 2013, Acta Geol. Sin.		The Central GXR	Manketouebo Fm.	46.3514	46.3514	118.911	118.911				0742-1	Tuff				157.5											80.66	0.07		12.48		0.25	0.07	0.29495	0.19	0.08	0.02		3.33	0.07	0
Cheng et al., 2013, Acta Geol. Sin.		The Central GXR	Manketouebo Fm.	46.5	46.5	119	119				1787-1	Rhyolite				158											73.31	0.44		13.68		1.57	0.46	1.87269	0.33	0.47	0.02		2.98	4.68	0.13
Wu 2014, Master' Dissertation		The Southern GXR		45.4725	45.4725	120.694	120.694				B3019					125											76.74	0.13		11.31		2.67	0.34	2.74247	0.12	0.04	0.03	B3019	3.66	3.86	0.02
Wu 2014, Master' Dissertation		The Southern GXR		45.4725	45.4725	120.694	120.694				B3256					125											74.16	0.19		13.55		1.74	0.43	1.99565	0.42	0.47	0.04	B3256	3.81	3.6	0.03
Wu 2014, Master' Dissertation		The Southern GXR		45.4725	45.4725	120.694	120.694				B3065					125											72.12	0.22		13.91		1.69	0.55	2.07066	0.54	0.37	0.06	B3065	5.04	4.62	0.07
Wu 2014, Master' Dissertation		The Southern GXR		45.4725	45.4725	120.694	120.694				BB3340-1					125											73.64	0.19		13.55		1.59	0.65	2.08068	0.73	0.44	0.06	BB3340-1	4.24	3.37	0.11
Wu 2014, Master' Dissertation		The Southern GXR		45.4725	45.4725	120.694	120.694				B5063					125											75.56	0.08		12.86		0.77	0.12	0.812846	0.62	0.12	0.01	B5063	5.52	3.17	0.01
Wu 2014, Master' Dissertation		The Southern GXR		45.4725	45.4725	120.694	120.694				B5129-3					125											75.22	0.12		12.83		1.23	0.24	1.34675	0.31	0.26	0.04	B5129-3	4.45	3.42	0.03
Wu 2014, Master' Dissertation		The Southern GXR		45.4725	45.4725	120.694	120.694				B5246-1					125											69.96	0.43		14.23		1.49	1.51	2.8507	1.7	1.1	0.07	B5246-1	4.42	3.66	0.13
Wu 2014, Master' Dissertation		The Southern GXR		45.4922	45.4922	120.691	120.691				KB6183-1					125											69.96	0.43		14.23		1.49	1.51	2.8507	1.7	1.1	0.07	KB6183-1	4.42	3.66	0.13
Wu 2014, Master' Dissertation		The Southern GXR		45.4725	45.4725	120.694	120.694				B2136					125											74.12	0.15		13.22		1.52	0.34	1.7077	0.33	0.25	0.04	B2136	4.96	3.54	0.06
Wu 2014, Master' Dissertation		The Southern GXR		45.4725	45.4725	120.694	120.694				B2143					125											76.8	0.01		12.22		0.42	0.31	0.687916	0.31	0.04	0.02	B2143	5.93	2.61	0.04
Wu 2014, Master' Dissertation		The Southern GXR		45.4725	45.4725	120.694	120.694				BB2186					125											66.88	0.43		14.69		2.08	1.32	3.19158	2.01	1.18	0.07	BB2186	4.93	3.88	0.16
Wu 2014, Master' Dissertation		The Southern GXR		45.4725	45.4725	120.694	120.694				KB3130					125											76.68	0.09		11.56		1.4	0.89	2.14972	0.39	0.08	0.04	KB3130	3.6	3.73	0.05
Wu 2014, Master' Dissertation		The Southern GXR		45.4725	45.4725	120.694	120.694				B5121-3					125											73.26	0.16		13.67		1.4	0.34	1.59972	0.37	0.28	0.02	B5121-3	4.44	4.02	0.06
Wu 2014, Master' Dissertation		The Southern GXR		45.4725	45.4725	120.694	120.694				B5129-4					125											75.14	0.03		12.53		1.02	0.36	1.2778	0.54	0.09	0.02	B5129-4	5.11	3.69	0.06
Wu 2014, Master' Dissertation		The Southern GXR		45.4725	45.4725	120.694	120.694				B5134					125											74.14	0.1		13.37		0.96	0.74	1.60381	0.58	0.21	0.04	B5134	4.55	4.1	0.05
Wu 2014, Master' Dissertation		The Southern GXR		45.4725	45.4725	120.694	120.694				P7-100-1					125											77.28	0.01		12.39		0.29	0.36	0.620942	0.31	0.07	0.04	P7-100-1	4.09	3.55	0.01
Wu 2014, Master' Dissertation		The Southern GXR		45.4528	45.4528	120.697	120.697				P7-120-1					125											74.82	0.16		12.84		1.19	0.48	1.55076	0.54	0.29	0.05	P7-120-1	5.33	2.61	0.06
Yuan et al., 2015, Master's Dissertation		The Northern GXR		48.0833	48.0833	121.5	121.5				JB4079					172											72.93	0.38		13.88		1.06	0.9	1.85379	0.52	0.52	0.088		4.56	4.26	0.106
Yuan et al., 2015, Master's Dissertation		The Northern GXR		48.0833	48.0833	121.5	121.5				JB5176					172											77.96	0.17		11.67		0.78	0.38	1.08184	0.07	0.09	0.054		4.59	3.82	0.01
Yuan et al., 2015, Master's Dissertation		The Northern GXR		48.0833	48.0833	121.5	121.5				JB5177					172											77.77	0.15		11.9		1.12	0.05	1.05778	0.05	0.02	0.032		4.63	3.85	0.011
Yuan et al., 2015, Master's Dissertation		The Northern GXR		48.0833	48.0833	121.5	121.5				JB6124					172											77.93	0.11		11.99		1.04	0.1	1.03579	0.05	0.02	0.044		4.32	3.97	0.01
Yuan et al., 2015, Master's Dissertation		The Northern GXR		48.0833	48.0833	121.5	121.5				JB8064					172											77.87	0.16		11.75		0.84	0.26	1.01583	0.12	0.08	0.083		4.56	3.99	0.015
Yuan et al., 2015, Master's Dissertation		The Northern GXR		48.0833	48.0833	121.5	121.5				JB8073					172											77.48	0.16		11.98		0.74	0.31	0.975852	0.11	0.09	0.089		4.75	3.73	0.023
Yuan et al., 2015, Master's Dissertation		The Northern GXR		48.0833	48.0833	121.5	121.5				LB1095					172											71.53	0.24		15.08		1.3	0.46	1.62974	0.29	0.09	0.053		5.81	4.51	0.02
Yuan et al., 2015, Master's Dissertation		The Northern GXR		48.0833	48.0833	121.5	121.5				LB1096-1					172											74.43	0.25		13.25		1.23	0.6	1.70675	0.72	0.22	0.047		4.85	3.63	0.051
Yuan et al., 2015, Master's Dissertation		The Northern GXR		48.0833	48.0833	121.5	121.5				LB1096-2					172											74.51	0.24		13.29		1.1	0.6	1.58978	0.71	0.28	0.054		4.91	3.59	0.051
Yuan et al., 2015, Master's Dissertation		The Northern GXR		48.0833	48.0833	121.5	121.5				LB1098					172											77.95	0.07		11.71		1.26	0.14	1.27375	0.07	0.04	0.016		4.32	4	0.007
Yuan et al., 2015, Master's Dissertation		The Northern GXR		48.0833	48.0833	121.5	121.5				LB3124-2					172											73.46	0.33		13.52		1.19	0.67	1.74076	1.02	0.49	0.056		4.51	4.18	0.096
Yuan et al., 2015, Master's Dissertation		The Northern GXR		48.0833	48.0833	121.5	121.5				LB6025					172											70.54	0.6		14.13		1.89	1.08	2.78062	1.44	0.74	0.094		4.12	4.41	0.162
Yuan et al., 2015, Master's Dissertation		The Northern GXR		48.0833	48.0833	121.5	121.5				LB6051					172											75.29	0.21		13.3		0.93	0.38	1.21681	0.64	0.24	0.051		4.44	3.78	0.042
Yuan et al., 2015, Master's Dissertation		The Northern GXR		48.0833	48.0833	121.5	121.5				PM001-10-1					169.4											75.37	0.15		13.27		0.89	0.19	0.990822	0.11	0.08	0.051		4.82	4.55	0.015
Yuan et al., 2015, Master's Dissertation		The Northern GXR		48.0833	48.0833	121.5	121.5				PM001-23-1					172											74.94	0.28		13		1.06	0.62	1.57379	0.94	0.37	0.057		4.12	3.99	0.074
Yuan et al., 2015, Master's Dissertation		The Northern GXR		48.0833	48.0833	121.5	121.5				PM001-25-1					172											71.6	0.31		14.83		1.35	0.6	1.81473	0.63	0.46	0.056		4.27	4.97	0.094
Yuan et al., 2015, Master's Dissertation		The Northern GXR		48.0833	48.0833	121.5	121.5				PM001-26-1					172											76.95	0.12		12.6		0.7	0.26	0.88986	0.39	0.12	0.025		4.21	4.18	0.024
Yuan et al., 2015, Master's Dissertation		The Northern GXR		48.0833	48.0833	121.5	121.5				PM001-27-1					166.3											72.81	0.34		13.86		1.24	0.79	1.90575	1.09	0.49	0.076		4.39	4.28	0.097
Yuan et al., 2015, Master's Dissertation		The Northern GXR		48.0833	48.0833	121.5	121.5				PM001-38-1					172											76.92	0.13		12.55		0.69	0.22	0.840862	0.33	0.15	0.054		4.77	3.79	0.026
Yuan et al., 2015, Master's Dissertation		The Northern GXR		48.0833	48.0833	121.5	121.5				PM001-4-1					172											75.37	0.21		13.18		0.91	0.31	1.12882	0.36	0.21	0.029		4.66	3.99	0.055
Yuan et al., 2015, Master's Dissertation		The Northern GXR		48.0833	48.0833	121.5	121.5				PM001-6-1					166.7											74.71	0.19		13.55		0.86	0.38	1.15383	0.53	0.25	0.038		4.76	4.15	0.045
Yuan et al., 2015, Master's Dissertation		The Northern GXR		48.0833	48.0833	121.5	121.5				PM001-7-1					172											74.37	0.24		13.53		1.4	0.2	1.45972	0.45	0.21	0.051		4.48	4.28	0.058
Yuan et al., 2015, Master's Dissertation		The Northern GXR		48.0833	48.0833	121.5	121.5				PM002-31-1					173											73.74	0.28		13.73		1.2	0.43	1.50976	0.39	0.27	0.051		5.13	4.06	0.065
Yuan et al., 2015, Master's Dissertation		The Northern GXR		48.0833	48.0833	121.5	121.5				PM002-36-1					172											72.6	0.29		14.3		1.26	0.55	1.68375	0.45	0.47	0.072		4.55	4.55	0.096
Yuan et al., 2015, Master's Dissertation		The Northern GXR		48.0833	48.0833	121.5	121.5				PM002-45-1					172											73.81	0.31		13.56		1.29	0.5	1.66074	0.72	0.43	0.055		4.3	4.2	0.081
Zeng et al. 2011, Journal of Jilin University (Earth Science Edition)		The Northern GXR		50.1791	50.1791	127.124	127.124				XK10-1					188											64.4	0.64		16.6		4.24			3.68	1.73	0.08		2.89	4.24	0.21
Zeng et al. 2011, Journal of Jilin University (Earth Science Edition)		The Northern GXR		50.1964	50.1964	126.806	126.806				XK10-2					188											64.56	0.62		16.78		4.05			3.76	1.66	0.08		2.75	4.37	0.21
Zeng et al. 2011, Journal of Jilin University (Earth Science Edition)		The Northern GXR		50.1964	50.1964	126.806	126.806				XK10-3					188											63.37	0.68		16.91		4.36			3.83	1.82	0.08		2.59	4.44	0.22
Zeng et al. 2011, Journal of Jilin University (Earth Science Edition)		The Northern GXR		50.1964	50.1964	126.806	126.806				XK10-5					188											60.54	0.72		18.81		4.91			4.22	1.79	0.11		1.82	5.53	0.26
Zeng et al. 2011, Journal of Jilin University (Earth Science Edition)		The Northern GXR		50.1964	50.1964	126.806	126.806				XK10-6					188											65.03	0.61		16.53		4.05			3.61	1.61	0.08		3.21	4.25	0.21
Zeng et al. 2011, Journal of Jilin University (Earth Science Edition)		The Northern GXR		50.1964	50.1964	126.806	126.806				XK10-26					188											68.97	0.32		16.56		2.33			1.57	0.59	0.05		3.07	5.18	0.13
Zeng et al. 2011, Journal of Jilin University (Earth Science Edition)		The Northern GXR		50.2795	50.2795	126.75	126.75				XK10-11					171											72.47	0.12		15.37		1.21			1.22	0.22	0.04		3.34	4.9	0.23
Zeng et al. 2011, Journal of Jilin University (Earth Science Edition)		The Northern GXR		50.1964	50.1964	126.806	126.806				XK10-48					171											73.72	0.21		13.77		1.3			0.73	0.27	0.04		5.15	3.74	0.06
Zeng et al. 2011, Journal of Jilin University (Earth Science Edition)		The Northern GXR		50.1964	50.1964	126.806	126.806				XK10-49					171											72.81	0.23		14.3		1.44			1.09	0.29	0.06		4.79	4.03	0.06
Zeng et al. 2011, Journal of Jilin University (Earth Science Edition)		The Northern GXR		50.1964	50.1964	126.806	126.806				XK10-8					164											74.29	0.04		14.45		0.72			0.71	0.09	0.09		4.42	4.28	0.21
Zeng et al. 2011, Journal of Jilin University (Earth Science Edition)		The Northern GXR		50.1964	50.1964	126.806	126.806				XK10-9					164											74.35	0.06		14.34		0.9			0.57	0.12	0.14		4.65	3.92	0.2
Zeng et al. 2011, Journal of Jilin University (Earth Science Edition)		The Northern GXR		50.1964	50.1964	126.806	126.806				XK10-10					164											74.59	0.1		13.97		1.08			0.9	0.15	0.04		4.29	4.04	0.2
Zeng et al. 2011, Journal of Jilin University (Earth Science Edition)		The Northern GXR		50.1964	50.1964	126.806	126.806				XK10-12					164											74.25	0.08		14.66		0.65			0.55	0.11	0.07		4.28	4.39	0.22
Zeng et al. 2011, Journal of Jilin University (Earth Science Edition)		The Northern GXR		50.1964	50.1964	126.806	126.806				XK10-13					164											72.94	0.13		15.09		1.2			0.71	0.16	0.06		3.68	4.99	0.04
Zeng et al. 2011, Journal of Jilin University (Earth Science Edition)		The Northern GXR		50.1964	50.1964	126.806	126.806				XK10-14					164											72.88	0.14		15.13		1.23			0.75	0.18	0.06		3.82	4.95	0.04
Zeng et al. 2011, Journal of Jilin University (Earth Science Edition)		The Northern GXR		50.2919	50.2919	126.957	126.957				XK10-17					128											69.94	0.32		15.31		2.07			1.22	0.59	0.08		5.03	4.18	0.06
Zeng et al. 2011, Journal of Jilin University (Earth Science Edition)		The Northern GXR		50.1964	50.1964	126.806	126.806				XK10-18					128											69.04	0.33		15.43		2.14			1.36	0.58	0.08		5.08	4.11	0.07
Zeng et al. 2011, Journal of Jilin University (Earth Science Edition)		The Northern GXR		50.0353	50.0353	126.393	126.393				XK10-50					121											71.76	0.3		14.52		1.84			0.85	0.41	0.05		5.06	4.48	0.06
Zeng et al. 2011, Journal of Jilin University (Earth Science Edition)		The Northern GXR		50.1964	50.1964	126.806	126.806				XK10-51					121											71.32	0.3		14.68		1.76			0.95	0.46	0.06		5.18	4.24	0.07
Zeng et al. 2011, Journal of Jilin University (Earth Science Edition)		The Northern GXR		50.1964	50.1964	126.806	126.806				XK10-52					121											73.19	0.24		14.23		1.43			0.79	0.32	0.05		5	4.16	0.05
Zeng et al. 2011, Journal of Jilin University (Earth Science Edition)		The Northern GXR		50.1964	50.1964	126.806	126.806				XK10-53					121											71.76	0.28		14.26		1.67			0.92	0.39	0.06		5.13	4.26	0.06
Zeng et al. 2011, Journal of Jilin University (Earth Science Edition)		The Northern GXR		50.1964	50.1964	126.806	126.806				XK10-54					121											71.6	0.29		14.71		1.74			0.95	0.42	0.05		5.05	4.28	0.07
Zeng et al. 2011, Journal of Jilin University (Earth Science Edition)		The Northern GXR		50.1964	50.1964	126.806	126.806				XK10-55					121											71.9	0.26		14.33		1.6			0.8	0.35	0.04		4.95	4.25	0.06
Zhang et al., 2017, Geological Bulletin of China		The Northern GXR		47.1667	47.1667	122.883	122.883				PM412YQ7					122.5											73.32	0.2		14.04		0.63	0.54	1.10687	0.15	0.23	0.003		5	4.84	0.03
Zhang et al., 2017, Geological Bulletin of China		The Northern GXR		47.1667	47.1667	122.883	122.883				PM412YQ9					122.5											73.29	0.2		13.82		0.16	0.54	0.683968	0.52	0.49	0.01		5.25	4.65	0.03
Zhang et al., 2017, Geological Bulletin of China		The Northern GXR		47.1667	47.1667	122.883	122.883				PM412YQ10-1					122.5											73.85	0.2		13.41		0.74	0.54	1.20585	0.29	0.73	0.034		5.3	3.95	0.03
Zhang et al., 2017, Geological Bulletin of China		The Northern GXR		47.1667	47.1667	122.883	122.883				PM412YQ10-2					122.5											72.94	0.19		13.35		1.28	0.4	1.55174	0.21	0.54	0.044		5.44	4.21	0.05
Zhang et al., 2017, Geological Bulletin of China		The Northern GXR		47.1667	47.1667	122.883	122.883				PM412YQ23					122.5											74.16	0.17		12.76		1.18	0.56	1.62176	0.28	0.63	0.01		4.72	4.64	0.04
Zhang et al., 2017, Geological Bulletin of China		The Northern GXR		47.1667	47.1667	122.883	122.883				PM412YQ25					122.5											75.64	0.16		12.96		0.3	0.4	0.66994	0.13	0.18	0.004		4.54	4.54	0.04
Zhang et al., 2017, Geological Bulletin of China		The Northern GXR		47.1667	47.1667	122.883	122.883				PM412YQ27					122.5											73.14	0.2		13.85		0.58	0.45	0.971884	0.21	0.54	0.004		4.92	4.9	0.04
Xie, 2017, Master's Dissertation		The Central GXR		46.85	46.85	120.583	120.583				D0145-1		127	134		130											72.97	0.23		14.42		1.54773	0.2	1.59265	0.34	0.34	0.07		4.37	4.37	0.06
Xie, 2017, Master's Dissertation		The Central GXR		46.85	46.85	120.583	120.583				D0301-1-1		127	134		130											67.85	0.53		15.1		1.58853	1.45	2.87936	1.49	0.97	0.07		4.27	3.98	0.17
Xie, 2017, Master's Dissertation		The Central GXR		46.85	46.85	120.583	120.583				D0556-1-1		127	134		130											77.08	0.17		12.07		0.703296	0.15	0.782826	0.14	0.07	0.02		5.76	3.08	0.02
Xie, 2017, Master's Dissertation		The Central GXR		46.85	46.85	120.583	120.583				D0598-1-1		127	134		130											68.09	0.56		15.39		2.22751	1.1	3.10431	1.23	1.02	0.08		3.83	4.41	0.17
Xie, 2017, Master's Dissertation		The Central GXR		46.85	46.85	120.583	120.583				D1181-2-1		127	134		130											76.24	0.25		12.72		1.2333	0.15	1.25972	0.22	0.21	0.05		4.34	2.94	0.06
Xie, 2017, Master's Dissertation		The Central GXR		46.85	46.85	120.583	120.583				D1605-2		127	134		130											75.31	0.25		13.32		0.943185	0.6	1.44868	0.1	0.31	0.04		3.79	3.15	0.05
Xie, 2017, Master's Dissertation		The Central GXR		46.85	46.85	120.583	120.583				D1665-1-1		127	134		130											77.28	0.15		12.25		0.673296	0.15	0.755832	0.23	0.08	0.06		4.77	3.73	0.02
Xie, 2017, Master's Dissertation		The Central GXR		46.85	46.85	120.583	120.583				D2137-2		127	134		130											77.4	0.14		12.56		0.707728	0.2	0.836814	0.13	0.22	0.08		5.4	1.37	0.02
Xie, 2017, Master's Dissertation		The Central GXR		46.85	46.85	120.583	120.583				D2220-1-1		127	134		130											68.51	0.54		15.44		2.05864	1	2.85237	1.79	0.92	0.07		3.7	4.41	0.17
Xie, 2017, Master's Dissertation		The Central GXR		46.85	46.85	120.583	120.583				D2222-2-1		127	134		130											66.06	0.63		15.92		2.26853	1.45	3.49122	1.62	1.3	0.06		3.84	4.45	0.18
Xie, 2017, Master's Dissertation		The Central GXR		46.85	46.85	120.583	120.583				D2285-2-1		127	134		130											68.24	0.57		15.07		1.7741	1.4	2.99633	1.62	1.13	0.09		3.87	4.41	0.18
Xie, 2017, Master's Dissertation		The Central GXR		46.85	46.85	120.583	120.583				D2527-1-1		127	134		130											74.44	0.26		13.55		1.26659	0.3	1.43968	0.48	0.3	0.04		4.65	4.1	0.06
Xie, 2017, Master's Dissertation		The Central GXR		46.7011	46.7011	120.377	120.377				D2615		127	134		130											69.43	0.43		15.3		1.97875	0.55	2.33048	0.79	0.61	0.08		4.85	4.81	0.12
Xie, 2017, Master's Dissertation		The Central GXR		46.85	46.85	120.583	120.583				D3074-1		127	134		130											78.43	0.09		11.57		0.165457	0.4	0.548878	0.92	0.23	0.07		4.44	2.76	0.01
Xie, 2017, Master's Dissertation		The Central GXR		46.85	46.85	120.583	120.583				D3617-1-1		127	134		130											68.3	0.58		14.86		1.9041	1.4	3.11331	2.55	1.06	0.08		4.08	4.13	0.19
Xie, 2017, Master's Dissertation		The Central GXR		46.85	46.85	120.683	120.683				PM011-7-1		127	134		130											65.21	0.52		16.2		2.39967	1.35	3.50922	2.18	1.15	0.09		4.36	4.19	0.2
Xie, 2017, Master's Dissertation		The Central GXR		46.85	46.85	120.683	120.683				PM012-3-1		127	134		130											68.23	0.56		15.56		2.42648	0.75	2.93335	0.97	0.99	0.07		3.86	4.67	0.17
Xie, 2017, Master's Dissertation		The Central GXR		46.7697	46.7697	120.717	120.717				PM014-3-1		127	134		130											75.15	0.19		13.72		0.708864	0.1	0.737836	0.13	0.24	0.02		4.66	3.43	0.03
Xie, 2017, Master's Dissertation		The Central GXR		46.85	46.85	120.683	120.683				PM014-7-1		127	134		130											67.89	0.47		15.9		2.22762	0.65	2.65441	0.69	1.01	0.05		4.77	4.44	0.14
Xie, 2017, Master's Dissertation		The Central GXR		46.85	46.85	120.683	120.683				PM020-7-1		127	134		130											74.21	0.22		13.75		1.46659	0.3	1.61964	0.19	0.33	0.05		4.62	3.44	0.06
Li et al., 2015, JAES		The Northern GXR	Tamulangou Fm.	47.4997	47.4997	121.105	121.105				P03b5-2	Basaltic Andesite				146.7											50.74	1.88		15.09		2.97	5.77	8.44241	8.87	6.37	0.27		1.57	3.03	0.6
Li et al., 2015, JAES		The Northern GXR	Tamulangou Fm.	47.4997	47.4997	121.105	121.105				P03b8-1	Basaltic Andesite				146.7											53.39	1.38		16.7		5.06	2.91	7.46299	6.12	3.72	0.21		2.81	3.29	0.52
Li et al., 2015, JAES		The Northern GXR	Tamulangou Fm.	47.4997	47.4997	121.105	121.105				P05b13-1	Basaltic Andesite				146.7											53.18	1.54		16.74		3.29	5.68	8.64034	5.02	4.05	0.15		2.52	4.02	0.74
Li et al., 2015, JAES		The Northern GXR	Tamulangou Fm.	47.4997	47.4997	121.105	121.105				P05b5-1	Andesite				146.7											62.05	0.98		13.89		4.93	0.99	5.42601	3.99	2.07	0.09		2.01	3.96	0.38
Li et al., 2015, JAES		The Northern GXR	Tamulangou Fm.	47.4997	47.4997	121.105	121.105				P05b6-1	Andesite				146.7											50	1.85		17.22		9.33	0.31	8.70513	8.51	4.72	0.16		2.53	2.95	0.75
Li et al., 2015, JAES		The Northern GXR	Tamulangou Fm.	47.4997	47.4997	121.105	121.105				P06b12-1	Basaltic Andesite				146.7											50.22	1.85		15.27		5.03	4.4	8.92599	7.74	5.42	0.23		2.45	3.05	1.08
Li et al., 2015, JAES		The Northern GXR	Tamulangou Fm.	47.4997	47.4997	121.105	121.105				P06b4-1	Andesite				146.7											51.31	1.73		16.25		6.45	3.32	9.12371	5.91	4.17	0.09		1.52	2.59	0.52
Li et al., 2015, JAES		The Northern GXR	Tamulangou Fm.	47.4997	47.4997	121.105	121.105				P06b8-1	Basaltic Andesite				146.7											57.83	1.38		17.27		5.05	3	7.54399	1.73	2.79	0.06		2.91	4.39	0.64
Li et al., 2015, JAES		The Northern GXR	Tamulangou Fm.	47.4997	47.4997	121.105	121.105				P09b2-1	Andesite				146.7											55.76	1.86		18.92		3.28	2.93	5.88134	3.47	2.58	0.07		3.19	3.5	0.93
Yang et al., 2016, Geol. Rev. (In Chinese)		The Northern GXR	Tamulangou Fm.	51.8644	51.8644	124.031	124.031				PM02TC18	Basaltic				153											52.94	1.28		17		4.19	3.76	7.53016	6.86	3.71	0.134		3.88	3.56	0.36
Yang et al., 2016, Geol. Rev. (In Chinese)		The Northern GXR	Tamulangou Fm.	51.8644	51.8644	124.031	124.031				PM02TC32	Basaltic Andesite				153											51.15	1.25		17.73		5.58	3.57	8.59088	7.38	5.04	0.142		1.28	3.93	0.302
Yang et al., 2016, Geol. Rev. (In Chinese)		The Northern GXR	Tamulangou Fm.	51.8644	51.8644	124.031	124.031				PM02TC51	Basaltic Andesite				153											53.7	1.32		17.52		5.55	2.63	7.62389	4.78	3.73	0.131		3.01	4.32	0.37
Yang et al., 2016, Geol. Rev. (In Chinese)		The Northern GXR	Tamulangou Fm.	51.8644	51.8644	124.031	124.031				PM03TC20	Basaltic Andesite				153											57.32	1.11		17.35		5.86	1.27	6.54283	5.25	2.67	0.114		3.12	3.88	0.378
Yang et al., 2016, Geol. Rev. (In Chinese)		The Northern GXR	Tamulangou Fm.	51.8611	51.8611	124.025	124.025				PM04TC51	Basaltic Andesite				153											51.81	1.28		18.03		3.19	5.29	8.16036	4.44	3.01	0.123		1.76	3.85	0.374
Yang et al., 2016, Geol. Rev. (In Chinese)		The Northern GXR	Tamulangou Fm.	51.8678	51.8678	124.037	124.037				PM04TC73	Basaltic Andesite				154											53	1.23		16.73		3.42	3.52	6.59732	6.21	3.21	0.108		2.09	4.44	0.366
Yang et al., 2016, Geol. Rev. (In Chinese)		The Northern GXR	Tamulangou Fm.	51.8644	51.8644	124.031	124.031				PM10TC37	Basaltic Andesite				153											58.87	0.96		16.97		5.01	1.29	5.798	4.12	2.16	0.08		2.5	4.86	0.35
Yang et al., 2016, Geol. Rev. (In Chinese)		The Northern GXR	Tamulangou Fm.	51.8644	51.8644	124.031	124.031				PM10TC39	Basaltic Andesite				153											59.06	0.98		17.04		4.72	1.2	5.44706	3.75	2.23	0.07		2.78	4.38	0.36
Yang et al., 2016, Geol. Rev. (In Chinese)		The Northern GXR	Tamulangou Fm.	51.8644	51.8644	124.031	124.031				PM16TC4	Basaltic Andesite				153											55.03	0.9		18.16		6.7	0.21	6.23866	7.46	2.14	0.12		2.41	4.03	0.3
Yang et al., 2016, Geol. Rev. (In Chinese)		The Northern GXR	Tamulangou Fm.	51.8644	51.8644	124.031	124.031				PM16TC11	Basaltic Andesite				153											55.2	1.09		17.85		4.98	2.95	7.431	5.26	3.28	0.13		2.57	3.96	0.36
Yang et al., 2016, Geol. Rev. (In Chinese)		The Northern GXR	Tamulangou Fm.	51.8644	51.8644	124.031	124.031				PM16TC103	Basaltic Andesite				153											52.61	1.21		17.32		5.66	2.46	7.55287	4.22	4.06	0.14		2.75	4.48	0.38
Yang et al., 2016, Geol. Rev. (In Chinese)		The Northern GXR	Tamulangou Fm.	51.8644	51.8644	124.031	124.031				PM16TC104	Basaltic Andesite				153											49.96	1.16		16.5		4.66	3.89	8.08307	5.95	4.6	0.14		1.68	4.03	0.34
Yang et al., 2016, Geol. Rev. (In Chinese)		The Northern GXR	Tamulangou Fm.	51.8644	51.8644	124.031	124.031				PM17TC54	Basaltic Andesite				153											57.75	0.95		16.31		3.93	3.2	6.73621	3.91	3.31	0.14		1.73	4.53	0.27
Liu et al., 2022, Lithos		The Central GXR	Manitu	46.75	46.75	120.083	120.083				B2008-b1	andesite				130											53.71	0.98		17.48				7.60012	4.2	3.73	0.15		2.73	2.8	0.322
Liu et al., 2022, Lithos		The Central GXR	Manitu	46.75	46.75	120.083	120.083				B2008-b4	andesite				130											57.5	0.822		16.57				5.75734	4.97	2.49	0.11		3.21	2.73	0.318
Liu et al., 2022, Lithos		The Central GXR	Manitu	46.75	46.75	120.083	120.083				B5232-4	andesite				130											56.01	0.991		17.32				7.15237	4.35	3.97	0.18		1.6	3.54	0.316
Liu et al., 2022, Lithos		The Central GXR	Manitu	46.75	46.75	120.083	120.083				B0154	andesite				130											58.21	0.82		16.2				5.43641	5.49	1.64	0.12		3.66	3.38	0.28
Liu et al., 2022, Lithos		The Central GXR	Manitu	46.75	46.75	120.083	120.083				B0072	trachydacite				130											65.53	0.54		16.08				3.59239	2.59	1.16	0.11		4.48	4.04	0.17
Liu et al., 2022, Lithos		The Central GXR	Manitu	46.75	46.75	120.083	120.083				B1395-2	trachydacite				130											65.23	0.728		15.17				4.70706	1.28	1.19	0.14		4.58	3.21	0.216
Liu et al., 2022, Lithos		The Central GXR	Manitu	46.75	46.75	120.083	120.083				B3235-1	rhyolitic ignimbrite				130											69.69	0.38		15.29				2.32762	1.35	0.62	0.09		4.05	3.63	0.13
Liu et al., 2022, Lithos		The Central GXR	Manitu	46.6803	46.6803	119.968	119.968				LDB02	rhyolitic ignimbrite				130											72.87	0.35		14.32				1.72271	0.36	0.32	0.03		4.64	3.82	0.09
Liu et al., 2022, Lithos		The Central GXR	Manitu	46.75	46.75	120.083	120.083				B0005-1	rhyolitic ignimbrite				130											75	0.11		13.62				0.703888	0.18	0.12	0.04		5.11	2.79	0.01
Liu et al., 2022, Lithos		The Central GXR	Manitu	46.75	46.75	120.083	120.083				B1028	rhyolitic ignimbrite				130											74.63	0.2		13.42				1.1878	0.31	0.19	0.02		4.98	3.02	0.04
Liu et al., 2022, Lithos		The Central GXR	Manitu	46.75	46.75	120.083	120.083				B1071	rhyolitic ignimbrite				130											75.75	0.17		13.21				0.973828	0.26	0.16	0.01		5.05	2.86	0.03
Liu et al., 2022, Lithos		The Central GXR	Manitu	46.75	46.75	120.083	120.083				B1300	rhyolitic ignimbrite				130											78.43	0.09		12.61				0.588898	0.1	0.08	0.02		3.18	3.86	0.02
Liu et al., 2022, Lithos		The Central GXR	Manitu	46.75	46.75	120.083	120.083				B2089-2	rhyolitic ignimbrite				130											75.86	0.18		13.36				1.03281	0.12	0.14	0.02		5.26	2.87	0.03
Liu et al., 2022, Lithos		The Central GXR	Manitu	46.75	46.75	120.083	120.083				B2200-1	rhyolitic ignimbrite				130											78.6338	0.0912451		12.2499				0.420662	0.02	0.0565716	0.0348793		4.17267	3.17269	0.0105796
Liu et al., 2022, Lithos		The Central GXR	Manitu	46.75	46.75	120.083	120.083				B3105-1	rhyolitic ignimbrite				130											75.5	0.19		13.33				1.32876	0.26	0.19	0.02		4.93	3.08	0.03
Liu et al., 2022, Lithos		The Central GXR	Baiyin'gaolao	46.75	46.75	120.083	120.083				B2152-6	trachydacite				125											60.1923	0.792807		16.2859				4.61996	3.57413	2.03231	0.117971		3.99223	2.71737	0.240288
Liu et al., 2022, Lithos		The Central GXR	Baiyin'gaolao	46.6608	46.6608	120.14	120.14				NL003-2	trachydacite				125											61.308	0.555072		16.1246				3.93435	3.96556	1.59725	0.122586		4.26718	2.96996	0.240857
Liu et al., 2022, Lithos		The Central GXR	Baiyin'gaolao	46.7333	46.7333	120.02	120.02				NL008	trachydacite				125											62.6933	0.812237		16.5123				4.84349	3.84431	1.9331	0.0940331		4.18703	2.6392	0.236033
Liu et al., 2022, Lithos		The Central GXR	Baiyin'gaolao	46.6608	46.6608	120.14	120.14				NL003	rhyolitic ignimbrite				125											69.4303	0.323948		15.4078				2.03852	1.70583	0.619409	0.0725319		4.78643	3.19786	0.114596
Liu et al., 2022, Lithos		The Central GXR	Baiyin'gaolao	46.75	46.75	120.083	120.083				B1191	rhyolitic ignimbrite				125											70.8	0.44		15.11				2.33772	1.11	0.75	0.12		4.08	3.67	0.13
Liu et al., 2022, Lithos		The Central GXR	Baiyin'gaolao	46.75	46.75	120.083	120.083				B1036-2	rhyolitic ignimbrite				125											75.62	0.21		13.45				1.36475	0.27	0.22	0.02		5	2.75	0.04
Liu et al., 2022, Lithos		The Central GXR	Baiyin'gaolao	46.75	46.75	120.083	120.083				B1389	rhyolitic ignimbrite				125											73.48	0.3		14.41				1.42279	0.51	0.41	0.04		4.64	3.06	0.06
Liu et al., 2022, Lithos		The Central GXR	Baiyin'gaolao	46.75	46.75	120.083	120.083				B2353-2	rhyolitic ignimbrite				125											75.83	0.17		13.52				0.98481	0.36	0.13	0.04		4.89	3.48	0.02
Liu et al., 2022, Lithos		The Central GXR	Baiyin'gaolao	46.75	46.75	120.083	120.083				B3039-1	rhyolitic ignimbrite				125											71.42	0.37		15.17				1.95363	0.65	0.42	0.06		5.02	3.04	0.09
Liu et al., 2022, Lithos		The Central GXR	Baiyin'gaolao	46.75	46.75	120.083	120.083				B3138-1	rhyolitic ignimbrite				125											77.13	0.21		12.22				1.03383	0.19	0.17	0.02		4.64	3.18	0.03
Liu et al., 2022, Lithos		The Central GXR	Baiyin'gaolao	46.75	46.75	120.083	120.083				B1035	rhyolitic ignimbrite				125											75.66	0.18		13.82				0.88988	0.2	0.29	0.04		4.72	2.22	0.04
Liu et al., 2022, Lithos		The Central GXR	Baiyin'gaolao	46.75	46.75	120.083	120.083				B1215	rhyolitic ignimbrite				125											79.08	0.12		11.91				0.69988	0.05	0.23	0.02		4.15	2.33	0.02
Liu et al., 2022, Lithos		The Central GXR	Baiyin'gaolao	46.6461	46.6461	120.064	120.064				NL007	rhyolitic ignimbrite				125											77.81	0.19		12.7				0.892866	0.08	0.15	0.05		4.28	2.86	0.03
Liu et al., 2022, Lithos		The Central GXR	Baiyin'gaolao	46.7608	46.7608	120.071	120.071				NL010	rhyolitic ignimbrite				125											76.35	0.16		13.58				0.561964	0.13	0.18	0.01		5.49	1.97	0.01
Liu et al., 2022, Lithos		The Central GXR	Baiyin'gaolao	46.75	46.75	120.083	120.083				B1061	rhyolite				125											75.42	0.24		13.01				1.12677	0.16	0.19	0.04		5.71	2.69	0.03
Liu et al., 2022, Lithos		The Central GXR	Baiyin'gaolao	46.75	46.75	120.083	120.083				B1064	rhyolite				125											78.93	0.13		12.23				0.435932	0.09	0.16	0		4.42	2.79	0.02
Liu et al., 2022, Lithos		The Central GXR	Baiyin'gaolao	46.75	46.75	120.083	120.083				B1122-1	rhyolite				125											75.5305	0.183077		13.3201				1.03705	0.497663	0.213461	0.0237014		4.92175	3.20572	0.0432767
Liu et al., 2022, Lithos		The Central GXR	Baiyin'gaolao	46.75	46.75	120.083	120.083				B1385	rhyolite				125											77.02	0.17		13.36				0.777856	0.11	0.13	0.02		5.24	2.74	0.02
Liu et al., 2022, Lithos		The Central GXR	Baiyin'gaolao	46.75	46.75	120.083	120.083				B1385-3	rhyolite				125											75.89	0.19		13.47				0.642886	0.09	0.15	0.01		5.81	2.5	0.02
Liu et al., 2022, Lithos		The Central GXR	Baiyin'gaolao	46.75	46.75	120.083	120.083				B2079-1	rhyolite				125											75.41	0.25		13.09				1.21182	0.25	0.22	0.07		5.01	3.04	0.04
Liu et al., 2022, Lithos		The Central GXR	Baiyin'gaolao	46.75	46.75	120.083	120.083				B3114-1	rhyolite				125											76.88	0.15		13.3				0.611884	0.05	0.14	0.03		5.39	1.19	0.01
Liu et al., 2022, Lithos		The Central GXR	Baiyin'gaolao	46.7447	46.7447	120.046	120.046				NL009	rhyolite				125											77.4	0.15		12.39				0.723928	0.4	0.13	0.08		5.12	2.22	0.04
Liu et al., 2022, Lithos		The Central GXR	Baiyin'gaolao	46.75	46.75	120.083	120.083				B1036	rhyolite				125											76.26	0.17		13.39				0.665872	0.1	0.18	0.03		4.41	3.5	0.03
Liu et al., 2022, Lithos		The Central GXR	Baiyin'gaolao	46.75	46.75	120.083	120.083				B1057	rhyolite				125											78.26	0.1		12.42				0.673928	0.09	0.15	0.02		5.37	1.77	0.02
Liu et al., 2022, Lithos		The Central GXR	Baiyin'gaolao	46.75	46.75	120.083	120.083				B1164	rhyolite				125											77.7851	0.0940237		12.87				0.507808	0.0642497	0.0916375	0.00904964		5.26968	2.37302	0.00934991
Liu et al., 2022, Lithos		The Central GXR	Baiyin'gaolao	46.75	46.75	120.083	120.083				B2177-9	rhyolite				125											79.28	0.09		12.24				0.887856	0.01	0.16	0.01		3.42	2.3	0.02
Shang et al., 2021, Acta Geologica Sinica		The Southern GXR		45.25	45.25	118.933	118.933				NHBT01-01					136											78.84	0.07		11		1.21	1.7	2.78876	0.04	0.37	0.35		3.22	0.1	0.03
Shang et al., 2021, Acta Geologica Sinica		The Southern GXR		45.25	45.25	118.933	118.933				NHBT01-02					136											78.35	0.08		11.16		1.16	1.86	2.90377	0.05	0.4	0.39		3.3	0.05	0.03
Shang et al., 2021, Acta Geologica Sinica		The Southern GXR		45.25	45.25	118.933	118.933				NHBT01-03					136											78.87	0.08		11.36		0.6	1.89	2.42988	0.04	0.39	0.38		3.37	0.01	0.03
Shang et al., 2021, Acta Geologica Sinica		The Southern GXR		45.25	45.25	118.933	118.933				NHBT01-04					136											75.97	0.08		11.75		1.43	2.29	3.57671	0.07	0.52	0.51		3.46	0.12	0.03
Shang et al., 2021, Acta Geologica Sinica		The Southern GXR		45.25	45.25	118.933	118.933				NH1082-01					132.6											69.12	0.46		16.1		2.5	0.32	2.5695	2.17	0.24	0.07		4.3	3.78	0.18
Shang et al., 2021, Acta Geologica Sinica		The Southern GXR		45.25	45.25	118.933	118.933				NH1082-02					132.6											68.4	0.48		16.17		2.26	0.38	2.41355	2.37	0.25	0.1		4.49	4.12	0.18
Shang et al., 2021, Acta Geologica Sinica		The Southern GXR		45.25	45.25	118.933	118.933				NH1082-03					132.6											69.55	0.45		16.23		2.16	0.38	2.32357	2.21	0.21	0.1		4.12	3.69	0.18
Shang et al., 2021, Acta Geologica Sinica		The Southern GXR		45.25	45.25	118.933	118.933				NH1082-04					132.6											68.96	0.48		16.12		1.58	0.34	1.76168	1.99	0.33	0.23		4.64	3.62	0.17
Shang et al., 2021, Acta Geologica Sinica		The Southern GXR		45.25	45.25	118.933	118.933				NH1082-05					132.6											68.65	0.51		16.46		2.51	0.35	2.6085	2.41	0.26	0.08		4.4	3.99	0.21
Shang et al., 2021, Acta Geologica Sinica		The Southern GXR		45.25	45.25	118.933	118.933				NH1082-06					132.6											68.81	0.49		16.31		1.79	0.34	1.95064	2.35	0.26	0.06		4.53	3.99	0.18
Yu et al., 2022, Arabian Journal of Geosciences		The Nouthern GXR		50.7576	50.7576	123.054	123.054				MK-1					166.3											71.51	0.45		14.62		1.69	0.58	2.10066	0.58	0.43	0.062		4.09	4.39	0.16
Yu et al., 2022, Arabian Journal of Geosciences		The Nouthern GXR		50.7576	50.7576	123.054	123.054				MK-2					166.3											71.7	0.38		15.41		0.67	0.42	1.02287	0.18	0.12	0.046		5.87	3.86	0.075
Yu et al., 2022, Arabian Journal of Geosciences		The Nouthern GXR		50.7576	50.7576	123.054	123.054				MK-3					166.3											73.49	0.37		14.13		1.69	0.25	1.77066	0.24	0.15	0.046		3.33	5.2	0.08
Yu et al., 2022, Arabian Journal of Geosciences		The Nouthern GXR		50.7576	50.7576	123.054	123.054				MK-4					166.3											75.67	0.26		13.19		1.51	0.07	1.4287	0.15	0.15	0.042		3.03	4.63	0.071
Yu et al., 2022, Arabian Journal of Geosciences		The Nouthern GXR		50.7576	50.7576	123.054	123.054				MK-5					166.3											76.61	0.14		12.86		0.47	0.12	0.542906	0.08	0.16	0.037		6.08	2.29	0.038
Yu et al., 2022, Arabian Journal of Geosciences		The Nouthern GXR		50.5118	50.5118	123.073	123.073				MN-1					155.2											55.84	1.13		16.36		4.08	2.71	6.38118	5.16	3.19	0.131		2.68	4.59	0.331
Yu et al., 2022, Arabian Journal of Geosciences		The Nouthern GXR		50.5118	50.5118	123.073	123.073				MN-2					155.2											56.27	1.23		17.31		5.28	2.25	7.00094	5.02	2.83	0.191		2.59	4.11	0.36
Yu et al., 2022, Arabian Journal of Geosciences		The Nouthern GXR		50.5118	50.5118	123.073	123.073				MN-3					155.2											56.04	1.25		16.98		4.41	2.8	6.76812	5.19	3.62	0.105		2.55	3.71	0.436
Yu et al., 2022, Arabian Journal of Geosciences		The Nouthern GXR		50.5118	50.5118	123.073	123.073				MN-4					155.2											54.18	2		16.12		7.01	1.65	7.9576	5.01	2.99	0.185		3.27	4.21	0.987
Yu et al., 2022, Arabian Journal of Geosciences		The Nouthern GXR		50.5118	50.5118	123.073	123.073				MN-5					155.2											53.72	2.01		16.32		6.35	2.23	7.94373	5.39	2.84	0.137		2.68	4.8	1.004
Yu et al., 2022, Arabian Journal of Geosciences		The Nouthern GXR		50.6164	50.6164	123.053	123.053				BY-1					123.3											77.53	0.14		12.73		0.53	0.22	0.696894	0.15	0.21	0.018		4.82	2.6	0.026
Yu et al., 2022, Arabian Journal of Geosciences		The Nouthern GXR		50.6164	50.6164	123.053	123.053				BY-2					123.3											73.71	0.29		14.27		0.64	0.32	0.895872	0.25	0.13	0.018		5.92	3.45	0.068
Yu et al., 2022, Arabian Journal of Geosciences		The Nouthern GXR		50.6164	50.6164	123.053	123.053				BY-3					123.3											73.78	0.27		14.06		0.66	0.44	1.03387	0.48	0.22	0.037		5.4	3.8	0.056
Yu et al., 2022, Arabian Journal of Geosciences		The Nouthern GXR		50.6164	50.6164	123.053	123.053				BY-4					123.3											72.85	0.3		14.56		1.59	0.24	1.67068	0.35	0.28	0.054		4.24	4.68	0.064
Yu et al., 2022, Arabian Journal of Geosciences		The Nouthern GXR		50.6164	50.6164	123.053	123.053				BY-5					123.3											75.42	0.28		13.97		0.33	0.1	0.396934	0.17	0.06	0.011		4.97	3.74	0.034
Tai et al., 2022, Geological Journal		The Central GXR		46.1289	46.1289	122.147	122.147				LHD01					123											78.15	0.06		11.86		0.94	0.22	1.06581	0.24	0.1	0.008		4.59	2.88	0.005
Tai et al., 2022, Geological Journal		The Central GXR		46.1289	46.1289	122.147	122.147				LHD02					123											78.03	0.07		11.86		0.91	0.25	1.06882	0.26	0.14	0.011		4.51	3.12	0.01
Tai et al., 2022, Geological Journal		The Central GXR		46.1289	46.1289	122.147	122.147				LHD03					123											77.82	0.06		11.91		1.04	0.14	1.07579	0.29	0.09	0.012		4.44	3.4	0.006
Tai et al., 2022, Geological Journal		The Central GXR		46.1289	46.1289	122.147	122.147				LHD04					123											78.66	0.07		11.49		1.02	0.11	1.0278	0.27	0.13	0.011		4.51	2.8	0.007
Tai et al., 2022, Geological Journal		The Central GXR		46.1289	46.1289	122.147	122.147				LHD07					123											77.48	0.15		11.09		2.19	0.25	2.22056	0.2	0.12	0.028		4.43	2.96	0.01
Tai et al., 2022, Geological Journal		The Central GXR		46.1289	46.1289	122.147	122.147				LHD08					123											77.14	0.16		11.14		2.19	0.31	2.28056	0.24	0.18	0.025		4.63	2.79	0.021
Tai et al., 2022, Geological Journal		The Central GXR		46.2028	46.2028	122.148	122.148				TPD16					122											78.48	0.04		11.83		0.92	0.2	1.02782	0.16	0.11	0.018		4.58	2.56	0.009
Tai et al., 2022, Geological Journal		The Central GXR		46.2028	46.2028	122.148	122.148				TPD17					122											78.17	0.04		12.17		0.72	0.15	0.797856	0.15	0.09	0.014		4.93	2.55	0.005
Tai et al., 2022, Geological Journal		The Central GXR		46.2028	46.2028	122.148	122.148				TPD18					122											76.04	0.13		12.55		1.3	0.35	1.51974	0.21	0.17	0.013		5.31	2.8	0.015
Tai et al., 2022, Geological Journal		The Central GXR		46.2028	46.2028	122.148	122.148				TPD19					122											75.76	0.12		12.81		1.24	0.25	1.36575	0.24	0.13	0.025		4.55	3.75	0.015
Cai et al., 2021, Geoscience Frotiners		The Nouthern GXR		50.2167	50.2167	125.8	125.8				GDBS-2-1					128											65.99	0.32		15.51				3.6082	3.78	1.45	0.09		2.27	4.43	0.13
Cai et al., 2021, Geoscience Frotiners		The Nouthern GXR		50.2167	50.2167	125.8	125.8				GDBS-2-2					128											64.78	0.34		15.85				3.34726	3.79	1.27	0.09		2.86	5.08	0.14
Cai et al., 2021, Geoscience Frotiners		The Nouthern GXR		50.2167	50.2167	125.8	125.8				GDBS-2-3					128											65.79	0.32		15.44				3.78816	3.59	1.96	0.09		2.8	3.75	0.15
Cai et al., 2021, Geoscience Frotiners		The Nouthern GXR		50.2167	50.2167	125.8	125.8				GDBS-2-4					128											65.55	0.31		15.78				3.69818	3.68	1.86	0.09		2.65	3.98	0.13
Cai et al., 2021, Geoscience Frotiners		The Nouthern GXR		50.2167	50.2167	125.8	125.8				GDBS-2-5					128											64.97	0.33		15.68				3.5812	3.71	1.32	0.09		2.75	4.85	0.14
Cai et al., 2021, Geoscience Frotiners		The Nouthern GXR		50.25	50.25	125.767	125.767				GSKG-1					175											70.71	0.39		14.62				2.60942	2.38	1.2	0.05		3.35	4	0.11
Cai et al., 2021, Geoscience Frotiners		The Nouthern GXR		50.25	50.25	125.767	125.767				GSKG-2					175											68.66	0.36		15.32				2.6814	2.83	1.14	0.05		2.84	4.35	0.11
Cai et al., 2021, Geoscience Frotiners		The Nouthern GXR		50.25	50.25	125.767	125.767				GSKG-3					175											67.19	0.47		15.56				3.28427	3.17	1.52	0.06		2.91	4.47	0.15
Cai et al., 2021, Geoscience Frotiners		The Nouthern GXR		50.25	50.25	125.767	125.767				GSKG-4					175											69.01	0.42		15.1				2.83437	2.92	1.32	0.06		2.98	4.27	0.13
Cai et al., 2021, Geoscience Frotiners		The Nouthern GXR		50.25	50.25	125.767	125.767				GSKG-5					175											67.92	0.45		14.85				2.94235	3.1	1.45	0.05		2.88	4.31	0.14
Gao et al., 2016, IGR		The Nouthern GXR		50.4297	50.4297	127.031	127.031				ZK259-5-268					120											61.82	0.65		17.4				4.46301	4	1.94	0.1		2.97	3.84	0.24
Gao et al., 2016, IGR		The Nouthern GXR		50.4297	50.4297	127.031	127.031				ZK20906-3-200					120											55.43	0.78		19.09				5.8487	6.38	2.93	0.13		0.71	3.95	0.25
Gao et al., 2016, IGR		The Nouthern GXR		50.4297	50.4297	127.031	127.031				ZK19401-1-13					120											63.15	0.6		18.09				4.28305	3.41	1.51	0.07		1.77	3.31	0.27
Gao et al., 2016, IGR		The Nouthern GXR		50.4297	50.4297	127.031	127.031				ZK17904-7					120											58.77	0.6		19.48				5.28183	4.21	2.15	0.11		1.48	5	0.29
Gao et al., 2016, IGR		The Nouthern GXR		50.4297	50.4297	127.031	127.031				ZK16904-340					120											60.01	0.68		17.13				5.16485	3.45	2.82	0.09		0.86	4.03	0.23
Gao et al., 2016, IGR		The Nouthern GXR		50.4297	50.4297	127.031	127.031				ZK18901-660					120											53.24	1.03		16.64				7.47734	7.73	4.03	0.15		1.87	2.63	0.25
Gao et al., 2016, IGR		The Nouthern GXR		50.4297	50.4297	127.031	127.031				ZK18907-277					120											54.2	1.05		16.84				7.53133	5.24	3.99	0.17		2.5	3.78	0.26
Gao et al., 2016, IGR		The Nouthern GXR		50.4297	50.4297	127.031	127.031				ZK18401-69					120											54.34	1.07		17.4				7.6663	7.67	4.17	0.16		1.64	2.95	0.26
Gao et al., 2016, IGR		The Nouthern GXR		50.3972	50.3972	127.054	127.054				BDGZK24001-190					120											65.18	0.53		16.55				3.63519	2.79	1.26	0.15		3.57	4.1	0.26
Gao et al., 2016, IGR		The Nouthern GXR		50.3972	50.3972	127.054	127.054				BDGZK1902-5					120											64.09	0.66		14.6				4.54399	1.5	2.49	0.13		4.22	3.37	0.23
Gao et al., 2016, IGR		The Nouthern GXR		50.3972	50.3972	127.054	127.054				BDGZK12001-121-2					120											61.51	0.63		16.99				4.71495	4.23	1.94	0.16		3.3	3.64	0.27
Gao et al., 2016, IGR		The Nouthern GXR		50.3972	50.3972	127.054	127.054				BDGZK24001-670					120											65.08	0.54		15.84				4.08509	3.79	2.2	0.11		2.8	3.97	0.17
Gao et al., 2016, IGR		The Nouthern GXR		50.3972	50.3972	127.054	127.054				BDGZK24001-430					120											64.13	0.6		15.96				4.39102	3.91	2.43	0.12		2.76	3.65	0.2
Gao et al., 2016, IGR		The Nouthern GXR		50.3972	50.3972	127.054	127.054				BDGZK24001-310					118.7											66.57	0.49		15.64				3.91413	2.99	1.98	0.11		2.86	3.81	0.17
Gao et al., 2016, IGR		The Nouthern GXR		50.4297	50.4297	127.031	127.031				ZK280-2-376					177											63.68	0.73		15.91				4.60698	2.66	2.04	0.12		3.5	3.37	0.19
Gao et al., 2016, IGR		The Nouthern GXR		50.4297	50.4297	127.031	127.031				ZK239-3-601					177											64.14	0.83		15.48				4.84992	3.7	2.09	0.12		3.46	3.44	0.21
Gao et al., 2016, IGR		The Nouthern GXR		50.4297	50.4297	127.031	127.031				ZK70-340					177											63.11	0.76		15.38				4.36403	2.62	2.24	0.11		3.96	3.58	0.21
Gao et al., 2016, IGR		The Nouthern GXR		50.4297	50.4297	127.031	127.031				ZK70-360					177											63.08	0.7		15.77				3.98611	2.56	2.08	0.1		3.99	4.15	0.19
Gao et al., 2016, IGR		The Nouthern GXR		50.4297	50.4297	127.031	127.031				ZK18901-800					120											65.95	0.81		15.4				4.31004	2.66	1.63	0.1		2.53	4.21	0.27
Gao et al., 2016, IGR		The Nouthern GXR		50.3731	50.3731	127.001	127.001				SDWZ-W5					177											66.46	0.65		14.7				4.00411	2.48	1.66	0.11		3.8	3.36	0.15
Gao et al., 2016, IGR		The Nouthern GXR		50.3731	50.3731	127.001	127.001				SDWZ-W4					177											67.6	0.58		15.02				4.0401	2.88	1.4	0.1		3.14	3.11	0.17
Gao et al., 2016, IGR		The Nouthern GXR		50.3731	50.3731	127.001	127.001				SDWZ-D3					120											60.2	0.69		16.15				5.12886	4.02	2.3	0.14		3.25	3.24	0.24
Han et al., 2020, IGR		The Southern GXR		44.7667	44.7667	120.267	120.267				D1188YQ1					123.8											67.777	0.258		15.567		3.315	0.459438	3.44227	1.212	0.304	0.081		5.586	4.541	0.138
Han et al., 2020, IGR		The Southern GXR		44.7667	44.7667	120.267	120.267				D1188YQ2					123.8											68.794	0.245		14.796		3.273	0.639218	3.58426	1.198	0.268	0.077		5.148	4.625	0.196
Han et al., 2020, IGR		The Southern GXR		44.7667	44.7667	120.267	120.267				D1188YQ3					123.8											67.08	0.257		15.846		3.356	0.439462	3.45919	1.296	0.296	0.118		5.659	4.716	0.136
Han et al., 2020, IGR		The Southern GXR		44.7667	44.7667	120.267	120.267				D1188YQ4					123.8											67.231	0.262		15.805		3.317	0.509377	3.49401	1.242	0.282	0.084		5.531	4.78	0.146
Han et al., 2020, IGR		The Southern GXR		44.7667	44.7667	120.267	120.267				D1188YQ5					123.8											66.775	0.278		15.759		3.42	0.499389	3.57671	1.238	0.298	0.093		5.734	4.769	0.146
Han et al., 2020, IGR		The Southern GXR		44.8167	44.8167	120.058	120.058				D6024YQ1					124.7											69.07	0.287		15.002		2.792	0.948839	3.46108	0.725	0.282	0.061		6.012	5.014	0.053
Han et al., 2020, IGR		The Southern GXR		44.8167	44.8167	120.058	120.058				D6024YQ2					124.7											70.566	0.274		14.727		2.707	0.71912	3.15488	0.681	0.286	0.066		5.829	4.213	0.051
Han et al., 2020, IGR		The Southern GXR		44.8167	44.8167	120.058	120.058				D6024YQ3					124.7											69.842	0.279		15.15		2.756	0.619242	3.09909	0.674	0.262	0.073		5.713	4.445	0.057
Han et al., 2020, IGR		The Southern GXR		44.8167	44.8167	120.058	120.058				D6024YQ4					124.7											69.802	0.266		14.912		2.736	0.689157	3.15101	0.654	0.255	0.075		5.879	4.267	0.054
Han et al., 2020, IGR		The Southern GXR		44.8167	44.8167	120.058	120.058				D6024YQ5					124.7											71.086	0.251		14.293		2.656	0.459438	2.84931	0.583	0.252	0.075		5.807	3.946	0.051
Han et al., 2020, IGR		The Southern GXR		44.5333	44.5333	119.983	119.983				PM005-34YQ3					123.3											71.997	0.248		13.522		2.101	0.509377	2.39986	0.33	0.305	0.044		5.678	4.377	0.048
Han et al., 2020, IGR		The Southern GXR		44.5333	44.5333	119.983	119.983				PM005-34YQ4					123.3											71.985	0.237		13.469		2.126	0.489401	2.40238	0.323	0.297	0.047		6.033	4.204	0.049
Han et al., 2020, IGR		The Southern GXR		44.5333	44.5333	119.983	119.983				PM005-34YQ5					123.3											73.13	0.243		13.462		2.106	0.389523	2.2845	0.282	0.287	0.041		5.773	3.258	0.048
Han et al., 2020, IGR		The Southern GXR		44.5833	44.5833	120.083	120.083				PM010-65YQ					124											76.9591	0.0744266		12.4493		0.451983	0.538386	0.945081	0.122703	0.166957	0.0563228		4.32579	3.74848	0.0252447
Han et al., 2020, IGR		The Southern GXR		44.5833	44.5833	120.083	120.083				PM009-30YQ					124											77.7076	0.0698366		12.359		0.528335	0.461104	0.9365	0.436479	0.168429	0.0359453		4.12344	3.14059	0.0683988
Han et al., 2020, IGR		The Southern GXR		44.5833	44.5833	120.083	120.083				PM009-45YQ					124											79.5021	0.0536371		9.92783		0.308067	0.313206	0.590404	0.0466842	0.0407245	0.00595968		7.14069	0.62378	0.0168858
Han et al., 2020, IGR		The Southern GXR		44.5833	44.5833	120.083	120.083				PM007-17YQ					124											73.715	0.209		12.976		1.53	0.679349	2.05604	0.258	0.375	0.067		5.914	3.216	0.034
Han et al., 2020, IGR		The Southern GXR		44.5833	44.5833	120.083	120.083				PM008-35YQ					124											72.434	0.242669		14.0035		2.07986	0.498253	2.36971	0.783768	0.463652	0.0351095		2.94713	5.23235	0.0576209
Han et al., 2020, IGR		The Southern GXR		44.5833	44.5833	120.083	120.083				PM008-49YQ					124											72.3465	0.190463		14.4954		0.898029	0.536828	1.34487	0.656489	0.279616	0.0384978		5.17188	4.22767	0.0494393
Han et al., 2020, IGR		The Southern GXR		44.5833	44.5833	120.083	120.083				PM010-15YQ					160											58.4988	0.804615		17.6586		3.66058	2.3093	5.60308	1.86895	2.26396	0.0979713		3.20494	5.76261	0.288703
Han et al., 2020, IGR		The Southern GXR		44.5833	44.5833	120.083	120.083				PM012-69YQ					160											57.9867	0.64538		19.2679		4.64016	1.58251	5.75773	0.858813	1.6353	0.0782587		3.3509	6.3166	0.389261
Han et al., 2020, IGR		The Southern GXR		44.5833	44.5833	120.083	120.083				PM012-88YQ					160											57.2281	0.913565		17.2492		3.30163	3.27811	6.24891	4.87518	3.96268	0.122305		2.78323	3.89568	0.30438
Han et al., 2020, IGR		The Southern GXR		44.5833	44.5833	120.083	120.083				PM011-9YQ					160											62.7537	0.667081		16.5655		3.77847	1.1319	4.53177	2.06365	1.23696	0.047064		3.93087	4.79439	0.266014
Han et al., 2020, IGR		The Southern GXR		44.65	44.65	119.9	119.9				PM004-27YQ2					161.4											62.598	0.943		15.058		7.938	0.948839	8.09145	1.419	1.508	0.115		2.361	6.225	0.235
Han et al., 2020, IGR		The Southern GXR		44.65	44.65	119.9	119.9				PM004-27YQ3					161.4											61.972	0.939		15.193		8.18	0.948839	8.3092	0.954	1.831	0.115		2.376	6.711	0.227
Han et al., 2020, IGR		The Southern GXR		44.65	44.65	119.9	119.9				PM004-27YQ4					161.4											58.451	1.059		16.596		8.605	2.74664	10.4894	4.576	2.231	0.134		2.337	4.254	0.256
Han et al., 2020, IGR		The Southern GXR		44.65	44.65	119.9	119.9				PM004-27YQ5					161.4											62.735	0.913		15.006		7.944	1.11863	8.26664	0.891	1.686	0.104		2.594	6.515	0.223
Han et al., 2020, IGR		The Southern GXR		44.6417	44.6417	119.942	119.942				PM004-38YQ1					159											60.483	0.954		16.56		7.258	3.03629	9.56703	4.381	2.059	0.085		2.822	3.697	0.251
Han et al., 2020, IGR		The Southern GXR		44.6417	44.6417	119.942	119.942				PM004-38YQ2					159											61.114	0.912		16.541		6.955	2.90644	9.16455	4.416	1.952	0.087		2.811	3.765	0.238
Han et al., 2020, IGR		The Southern GXR		44.6417	44.6417	119.942	119.942				PM004-38YQ3					159											61.366	0.909		15.874		7.473	2.41704	9.14125	2.43	2.332	0.079		2.76	4.543	0.233
Han et al., 2020, IGR		The Southern GXR		44.6417	44.6417	119.942	119.942				PM004-38YQ4					159											60.687	0.967		16.699		7.128	2.95638	9.37016	4.429	1.816	0.082		2.688	3.911	0.244
Han et al., 2020, IGR		The Southern GXR		44.6417	44.6417	119.942	119.942				PM004-38YQ5					159											60.531	0.973		16.654		6.974	2.92642	9.20162	4.379	1.838	0.083		2.625	4.268	0.245
Han et al., 2020, IGR		The Southern GXR		44.5833	44.5833	120.083	120.083				PM008-59YQ					160											59.1889	0.842474		16.9419		2.38303	3.82514	5.96939	4.84525	3.17777	0.105823		3.05448	3.99148	0.292708
Han et al., 2020, IGR		The Southern GXR		44.5833	44.5833	120.083	120.083				PM011-45YQ					160											56.8345	0.89566		18.2412		3.06224	3.94784	6.70324	5.06676	2.47734	0.139071		3.96353	3.60547	0.416591
Han et al., 2020, IGR		The Southern GXR		44.5833	44.5833	120.083	120.083				PM012-15YQ					160											60.303	1.07966		17.2291		6.3934	0.493033	6.24581	2.07476	1.82108	0.0814641		2.29234	5.93038	0.321732
Han et al., 2020, IGR		The Southern GXR		44.5833	44.5833	120.083	120.083				PM004-5YQ					160											57.066	0.93		16.283		6.643	3.15614	9.13351	3.434	1.69	0.106		4.034	6.696	0.378
Han et al., 2020, IGR		The Southern GXR		44.5833	44.5833	120.083	120.083				PM004-9YQ					160											61.813	0.742		14.423		5.372	2.7766	7.61033	1.942	1.531	0.114		3.35	7.737	0.296
Han et al., 2020, IGR		The Southern GXR		44.5833	44.5833	120.083	120.083				PM004-50YQ					160											59.561	0.878		16.276		6.233	3.04627	8.65473	3.81	1.677	0.111		2.849	6.896	0.238
Han et al., 2020, IGR		The Southern GXR		44.5833	44.5833	120.083	120.083				PM004-72YQ					160											58.034	0.913		17.48		7.003	3.81533	10.1166	4.72	2.416	0.078		1.736	4.164	0.296
Han et al., 2020, IGR		The Southern GXR		44.5833	44.5833	120.083	120.083				PM008-87YQ					160											55.1081	0.91643		17.4954		2.06634	5.32941	7.1887	6.23316	4.37976	0.143834		2.8397	3.50339	0.320134
Han et al., 2020, IGR		The Southern GXR		44.5833	44.5833	120.083	120.083				PM011-74YQ					160											60.8359	0.704789		16.6865		2.36462	2.62815	4.75583	4.34075	2.10459	0.100976		3.92865	3.43907	0.246319
Han et al., 2020, IGR		The Southern GXR		44.5833	44.5833	120.083	120.083				PM012-30YQ					160											62.121	0.730587		17.0502		3.16164	1.82868	4.67353	3.63607	2.17279	0.0737967		3.45158	3.71092	0.224342
Zhang et al., 2018, Lithos		The Nouthern GXR		50.5333	50.5333	124.467	124.467				DHS-3-01					161											72.3	0.44		12.8		0.92	0.9	1.72782	1.82	0.79	0.08		5.06	3.36	0.16
Zhang et al., 2018, Lithos		The Nouthern GXR		50.5333	50.5333	124.467	124.467				DHS-3-02					161											69.8	0.46		13.7		1.13	0.98	1.99677	2.03	0.86	0.11		5.32	3.59	0.18
Zhang et al., 2018, Lithos		The Nouthern GXR		50.5333	50.5333	124.467	124.467				DHS-3-03					161											70.6	0.47		13.8		1.11	1.02	2.01878	2.06	0.86	0.09		5.03	3.53	0.17
Zhang et al., 2018, Lithos		The Nouthern GXR		50.5333	50.5333	124.467	124.467				DHS-3-04					161											70.9	0.49		14		0.62	1.47	2.02788	2.37	0.92	0.13		4.59	3.57	0.18
Zhang et al., 2018, Lithos		The Nouthern GXR		50.5333	50.5333	124.467	124.467				DHS-3-05					161											70.5	0.48		14.1		1.01	1.15	2.0588	2.42	0.94	0.08		4.68	3.6	0.18
Zhang et al., 2018, Lithos		The Nouthern GXR		50.5333	50.5333	124.467	124.467				DHS-2-01					132											73.8	0.22		13.4		1.71	0.92	2.45866	0.9	0.38	0.1		4.19	3.65	0.04
Zhang et al., 2018, Lithos		The Nouthern GXR		50.5333	50.5333	124.467	124.467				DHS-2-02					132											72.9	0.22		13.9		1.7	0.83	2.35966	0.96	0.36	0.1		4.55	3.78	0.04
Zhang et al., 2018, Lithos		The Nouthern GXR		50.5333	50.5333	124.467	124.467				DHS-2-03					132											74.2	0.22		13.6		1.52	0.66	2.0277	0.77	0.28	0.07		4.38	3.48	0.04
Zhang et al., 2018, Lithos		The Nouthern GXR		50.5333	50.5333	124.467	124.467				DHS-2-04					132											73	0.22		13.8		1.65	0.92	2.40467	1.35	0.33	0.11		3.61	4	0.04
Zhang et al., 2018, Lithos		The Nouthern GXR		50.5333	50.5333	124.467	124.467				DHS-1-01					133											74.1	0.21		13		1.52	1.01	2.3777	1.37	0.23	0.09		3.43	4.3	0.04
Zhang et al., 2018, Lithos		The Nouthern GXR		50.5333	50.5333	124.467	124.467				DHS-1-02					133											73.1	0.21		13.6		1.64	0.9	2.37567	1.43	0.31	0.11		3.52	4.16	0.04
Zhang et al., 2018, Lithos		The Nouthern GXR		50.5333	50.5333	124.467	124.467				DHS-1-03					133											73.2	0.3		13.5		1.89	1.46	3.16062	0.66	0.32	0.09		5.63	3.3	0.05
Zhang et al., 2018, Lithos		The Nouthern GXR		50.5333	50.5333	124.467	124.467				DHS-1-04					133											72	0.3		13.8		2.04	1.39	3.22559	0.79	0.32	0.11		5.25	3.97	0.05
Zhang et al., 2018, Lithos		The Nouthern GXR		50.5333	50.5333	124.467	124.467				DHS-4-01					131											66.5	0.54		15.6		4.06	2.45	6.10319	2.92	1.47	0.13		3.13	4.39	0.18
Zhang et al., 2018, Lithos		The Nouthern GXR		50.5333	50.5333	124.467	124.467				DHS-4-02					131											67.8	0.47		15.2		3.69	2.1	5.42026	2.89	1.27	0.12		2.87	4.31	0.15
Xie et al., 2022, OGR		The Southern GXR		42.1139	42.1139	114.633	114.633				SS-8					137											74.96	0.07		12.81				1.28	0.6	0.06	0.05		4.2	4.31	0.01
Xie et al., 2022, OGR		The Southern GXR		42.1139	42.1139	114.633	114.633				SS-9					137											74.02	0.1		13.38				1.4	0.69	0.11	0.06		4.88	4.2	0.01
Xie et al., 2022, OGR		The Southern GXR		42.1139	42.1139	114.633	114.633				H40					137											74.95	0.11		12.75				1.91	0.69	0.11	0.11		4.53	4.02	0.03
Xie et al., 2022, OGR		The Southern GXR		42.1139	42.1139	114.633	114.633				H41					137											75.75	0.1		12.42				1.71	0.59	0.1	0.1		4.76	3.75	0.02
Xie et al., 2022, OGR		The Southern GXR		42.1139	42.1139	114.633	114.633				H42					137											74.89	0.11		13.06				1.68	0.69	0.11	0.1		4.5	3.95	0.02
Xie et al., 2022, OGR		The Southern GXR		42.1139	42.1139	114.633	114.633				H43					137											74.57	0.1		12.72				1.95	0.6	0.08	0.13		4.82	3.9	0.02
Xie et al., 2022, OGR		The Southern GXR		42.1139	42.1139	114.633	114.633				H44					137											74.47	0.12		12.96				1.73	0.74	0.18	0.1		5.09	3.8	0.03
Xie et al., 2022, OGR		The Southern GXR		42.1139	42.1139	114.633	114.633				H45					137											75.93	0.05		12.43				1.89	0.46	0.05	0.16		4.37	3.78	0.01
Guo et al., 2017, Master's Dissertation		The Nouthern GXR		51.9167	51.9167	124.25	124.25				PM004TC20					143											74.59	0.23		13.45		1.42	0.46	1.73772	0.25	0.31	0.06		4.56	3.46	0.06
Guo et al., 2017, Master's Dissertation		The Nouthern GXR		51.9167	51.9167	124.25	124.25				PM004TC21					143											72.14	0.22		14.23		1.59	0.45	1.88068	0.25	0.3	0.07		4.83	3.92	0.07
Guo et al., 2017, Master's Dissertation		The Nouthern GXR		51.9167	51.9167	124.25	124.25				PM005TC09					151											70.51	0.4		15.13		1.24	0.98	2.09575	2.04	0.65	0.04		3.58	4.29	0.13
Guo et al., 2017, Master's Dissertation		The Nouthern GXR		51.9167	51.9167	124.25	124.25				PM005TC13					151											69.54	0.43		15.82		1.05	1.13	2.07479	1.7	0.75	0.05		3.5	4.59	0.13
Guo et al., 2017, Master's Dissertation		The Nouthern GXR		51.9167	51.9167	124.25	124.25				PM001TC11					121											65.83	0.67		16.43		2.43	1.37	3.55651	0.65	1.31	0.09		4.02	5.14	0.26
Guo et al., 2017, Master's Dissertation		The Nouthern GXR		51.9167	51.9167	124.25	124.25				PM001TC24					121											67.79	0.54		15.72		1.98	1.22	3.0016	1.01	0.92	0.09		4.37	4.78	0.18
Guo et al., 2017, Master's Dissertation		The Nouthern GXR		51.9167	51.9167	124.25	124.25				PM008TC29					142.1											70.15	0.47		14.94		1.53	0.69	2.06669	0.96	0.51	0.06		4.39	5.14	0.1
Guo et al., 2017, Master's Dissertation		The Nouthern GXR		51.9167	51.9167	124.25	124.25				PM008TC41					142											72.58	0.35		14.35		1.34	0.31	1.51573	0.51	0.3	0.05		4.31	4.96	0.06
Guo et al., 2017, Master's Dissertation		The Nouthern GXR		51.9167	51.9167	124.25	124.25				PM001TC35					121											71.61	0.37		14.45		2.13	0.26	2.17657	0.43	0.37	0.05		4.76	4.29	0.09
Guo et al., 2017, Master's Dissertation		The Nouthern GXR		51.9167	51.9167	124.25	124.25				PM001TC41					121											71.3	0.4		14.53		1.41	0.85	2.11872	0.65	0.6	0.07		4.68	4.37	0.11
Guo et al., 2017, Master's Dissertation		The Nouthern GXR		51.9167	51.9167	124.25	124.25				PM008TC09					142											69.78	0.5		15.06		2.16	0.41	2.35357	0.88	0.49	0.07		5.04	4.35	0.11
Guo et al., 2017, Master's Dissertation		The Nouthern GXR		51.9167	51.9167	124.25	124.25				PM008TC16					142											70.14	0.49		14.96		1.73	0.58	2.13665	1.07	0.48	0.06		4.87	4.18	0.1
Zhang et al. 2010, Acta Petrologica Sinica		The Nouthern GXR		48.8465	48.8465	126.518	126.518				GW07012					187											72.17	0.27		14.75		2.32			1.12	0.36	0.06		4.6	4.28	0.06
Zhang et al. 2010, Acta Petrologica Sinica		The Nouthern GXR		48.9394	48.9394	126.362	126.362				GW07019					171											74.34	0.13		16.2		1.08			0.75	0.11	0.05		3.43	3.15	0.06
Li et al. 2014, Lithos		The Nouthern GXR		51.1708	51.1708	123.917	123.917				CL-01					172.4											69.42	0.34		15.98		1.05535	0.85	1.7996	0.39	0.16	0.07		4.67	5.39	0.1
Li et al. 2014, Lithos		The Nouthern GXR		51.1708	51.1708	123.917	123.917				CL-02					172.4											70.59	0.35		15.23		0.840802	1.25	2.00655	2.04	0.81	0.05		3.12	4.89	0.14
Li et al. 2014, Lithos		The Nouthern GXR		51.1708	51.1708	123.917	123.917				1902-674.1					148											77.54	0.09		12.28		0.0421605	0.25	0.287936	0.36	0.11	0.01		5.01	3.7	0.01
Li et al. 2014, Lithos		The Nouthern GXR		51.1708	51.1708	123.917	123.917				1111-1116					148											76.89	0.08		12.06		0.627728	0.2	0.76483	0.26	0.04	0.01		5.49	3.27	0.01
Li et al. 2014, Lithos		The Nouthern GXR		51.1708	51.1708	123.917	123.917				902-1196					148											77.28	0.08		12.14		0.0998889	0.45	0.53988	0.25	0.06	0.02		4.96	3.67	0.01
Li et al. 2014, Lithos		The Nouthern GXR		51.1708	51.1708	123.917	123.917				1103-1165.6					148											76.91	0.08		11.91		0.114321	0.5	0.602866	0.3	0.05	0.02		6.39	2.55	0.01
Li et al. 2014, Lithos		The Nouthern GXR		51.1708	51.1708	123.917	123.917				1703-383					147											76.88	0.05		13.3		0.207728	0.2	0.386914	0.13	0.09	0.02		4.4	3.78	0.02
Li et al. 2014, Lithos		The Nouthern GXR		51.1708	51.1708	123.917	123.917				1104-205.7					147											76.58	0.08		12.89		0.186593	0.3	0.467896	0.26	0.22	0.04		5.78	2.61	0.02
Li et al. 2014, Lithos		The Nouthern GXR		51.1708	51.1708	123.917	123.917				804-228					147											75.83	0.09		12.73		0.627728	0.2	0.76483	0.28	0.11	0.04		6.11	3.17	0.02
Li et al. 2014, Lithos		The Nouthern GXR		51.1708	51.1708	123.917	123.917				1503-448					147											77.1	0.08		12.42		0.747728	0.2	0.872806	0.31	0.04	0.01		3.75	4.72	0.01
Li et al. 2014, Lithos		The Nouthern GXR		51.1708	51.1708	123.917	123.917				1503-768					147											77.37	0.08		12.24		0.403296	0.15	0.512886	0.44	0.14	0.02		5.64	2.92	0.03
Li et al. 2014, Lithos		The Nouthern GXR		51.1708	51.1708	123.917	123.917				1501-488.8					147											79.56	0.07		11.67		0.877728	0.2	0.98978	0.06	0.31	0.02		5.24	0.2	0.01
Li et al. 2014, Lithos		The Nouthern GXR		51.1708	51.1708	123.917	123.917				1604-514					147											76.85	0.08		12.32		0.637728	0.2	0.773828	0.35	0.12	0.11		5.04	3.07	0.01
Li et al. 2014, Lithos		The Nouthern GXR		51.1708	51.1708	123.917	123.917				1102-521					147											77.58	0.07		12.03		0.713296	0.15	0.791824	0.3	0.06	0.03		4.49	3.88	0.01
Li et al. 2014, Lithos		The Nouthern GXR		51.1708	51.1708	123.917	123.917				1103-886					147											77.25	0.07		12.4		0.778864	0.1	0.800822	0.22	0.05	0.01		3.67	4.72	0.01
Li et al. 2014, Lithos		The Nouthern GXR		51.1708	51.1708	123.917	123.917				1102-752.8					147											76.95	0.07		12.41		0.46216	0.25	0.665852	0.19	0.05	0.01		3.88	4.73	0.01
Li et al. 2014, Lithos		The Nouthern GXR		51.1708	51.1708	123.917	123.917				1114-946.5					147											76.93	0.07		12.35		0.643296	0.15	0.728838	0.31	0.06	0.02		3.77	4.42	0.01
Li et al. 2014, Lithos		The Nouthern GXR		51.1708	51.1708	123.917	123.917				902-698					147											77.13	0.07		12.14		0.653296	0.15	0.737836	0.15	0.04	0.01		4.29	4.22	0.01
Li et al. 2014, Lithos		The Nouthern GXR		51.1708	51.1708	123.917	123.917				1707-186					147											80.01	0.07		12.04		0.453296	0.15	0.557876	0.55	0.31	0.19		3.92	0.11	0.01
Li et al. 2014, Lithos		The Nouthern GXR		51.1708	51.1708	123.917	123.917				1702-180					147											77.98	0.08		12.3		0.223296	0.15	0.350922	0.3	0.12	0.1		4.82	2.47	0.01
Li et al. 2014, Lithos		The Nouthern GXR		51.1708	51.1708	123.917	123.917				1708-361.7					147											77.46	0.16		11.5		0.285346	0.85	1.10675	0.58	0.35	0.09		1.28	5.02	0.02
Li et al. 2014, Lithos		The Nouthern GXR		51.1708	51.1708	123.917	123.917				1103-967.9					147											76.08	0.17		13.23		0.535457	0.4	0.881804	0.17	0.21	0.08		6.01	0.21	0.01
Li et al. 2014, Lithos		The Nouthern GXR		51.1708	51.1708	123.917	123.917				1707-639.4					128											73.19	0.22		13.7		0.29421	0.95	1.21473	0.4	0.46	0.04		6.01	2.86	0.04
Li et al. 2014, Lithos		The Nouthern GXR		51.1708	51.1708	123.917	123.917				1107-978					128											68.54	0.36		15.08		1.07751	1.1	2.06954	1.65	0.67	0.07		3.73	5.1	0.12
Li et al. 2014, Lithos		The Nouthern GXR		51.1708	51.1708	123.917	123.917				1709-470					128											70.98	0.29		13.98		0.325234	1.3	1.59265	0.97	0.5	0.08		4.43	4.41	0.07
Li et al. 2014, Lithos		The Nouthern GXR		51.1708	51.1708	123.917	123.917				903-1273.3					128											66.38	0.49		15.74		1.46296	1.5	2.81637	2.16	1.03	0.08		3.61	5.02	0.19
Li et al. 2014, Lithos		The Nouthern GXR		51.1708	51.1708	123.917	123.917				1104-1016.2					128											68.2	0.39		15.26		0.97637	1.2	2.07854	1.78	0.6	0.08		4.45	4.28	0.13
Li et al. 2016, Acta Petrologica Sinica		The Southern GXR		44.4167	44.4167	119.167	119.167				HL-2					144.8											75.5	0.11		13.08			1.33		0.35	0.2	0.01		4.81	3.82	0.03
Li et al. 2016, Acta Petrologica Sinica		The Southern GXR		44.4167	44.4167	119.167	119.167				HL-4					144.1											76.14	0.07		12.44			0.84		0.36	0.16	0.02		4.62	3.74	0.02
Li et al. 2016, Acta Petrologica Sinica		The Southern GXR		44.4167	44.4167	119.167	119.167				HL-1					141.9											75.95	0.05		12.36			0.82		0.31	0.14	0.02		4.38	3.89	0.01
Li et al. 2016, Acta Petrologica Sinica		The Southern GXR		44.4167	44.4167	119.167	119.167				HL-5					139.83											67.55	0.35		16.02			3.39		1.46	0.46	0.08		5.19	5.01	0.1
Li et al. 2016, Acta Petrologica Sinica		The Southern GXR		44.4167	44.4167	119.167	119.167				HL-6					139.7											76.08	0.08		12.25			1.01		0.33	0.11	0.02		4.45	3.62	0.01
Li et al. 2016, Acta Petrologica Sinica		The Southern GXR		44.4167	44.4167	119.167	119.167				HL-3					136.7											75.08	0.05		12.39			0.04		0.17	0.11	0		4.83	3.52	0.01
Tian et al. 2015, Geology Magazine		The Southern GXR		46.6083	46.6083	120.899	120.899				GW04196					134											77.23	0.12		12.2		0.68			0.13	0.08	0.01		4.79	3.73	0.01
Tian et al. 2015, Geology Magazine		The Southern GXR		46.6083	46.6083	120.899	120.899				GW04197					134											76.91	0.13		12.49		0.69			0.11	0.1	0.01		4.74	3.95	0.01
Tian et al. 2015, Geology Magazine		The Southern GXR		46.6083	46.6083	120.899	120.899				GW04198					134											77.1	0.14		12.5		0.86			0.13	0.09	0.06		4.54	3.93	0.01
Tian et al. 2015, Geology Magazine		The Southern GXR		46.7028	46.7028	121.848	121.848				12GW104					133.6											74.49	0.24		13.5		1.19			0.32	0.24	0.01		4.64	4.56	0.04
Tian et al. 2015, Geology Magazine		The Southern GXR		46.7029	46.7029	121.843	121.843				12GW105					134.3											74.86	0.27		13.64		1.02			0.25	0.2	0.03		4.58	4.03	0.05
Tian et al. 2015, Geology Magazine		The Southern GXR		46.7029	46.7029	121.843	121.843				12GW106					134											76.92	0.15		12.42		0.91			0.2	0.11	0.06		4.53	4.17	0.01
Tian et al. 2015, Geology Magazine		The Southern GXR		46.6083	46.6083	120.899	120.899				GW04190					135.9											76.4	0.21		12.33		1.21			0.14	0.11	0.15		4.4	4.23	0
Tian et al. 2015, Geology Magazine		The Southern GXR		46.6083	46.6083	120.899	120.899				GW04191					134											76.28	0.19		12.62		1.2			0.1	0.06	0.05		4.59	4.25	0.02
Tian et al. 2015, Geology Magazine		The Southern GXR		46.6083	46.6083	120.899	120.899				GW04192					134											76.34	0.22		12.94		1.41			0.25	0.12	0.12		4.5	4.37	0.02
Tian et al. 2015, Geology Magazine		The Southern GXR		46.6083	46.6083	120.899	120.899				GW04193					134											76	0.24		12.62		1.48			0.21	0.1	0.13		4.36	4.38	0
Tian et al. 2015, Geology Magazine		The Southern GXR		46.6083	46.6083	120.899	120.899				GW04194					134											78.03	0.15		11.85		1.06			0.06	0.05	0.09		4.23	3.98	0
Tian et al. 2015, Geology Magazine		The Southern GXR		46.6083	46.6083	120.899	120.899				GW04195					134											75.89	0.41		11.89		2.07			0.36	0.21	0.14		4.23	4.1	0.02
Tian et al. 2015, Geology Magazine		The Southern GXR		46.6827	46.6827	121.22	121.22				GW04369					133.6											76.67	0.11		12.77		1.29			0.4	0.06	0.03		4.72	3.78	0
Tian et al. 2015, Geology Magazine		The Southern GXR		46.6827	46.6827	121.22	121.22				GW04370					134											76.6	0.13		12.63		1.5			0.47	0.07	0.04		4.6	3.76	0
Tian et al. 2015, Geology Magazine		The Southern GXR		46.6827	46.6827	121.22	121.22				GW04371					134											77.51	0.1		12.49		1.19			0.29	0.06	0.03		4.44	3.73	0
Tian et al. 2015, Geology Magazine		The Southern GXR		46.6827	46.6827	121.22	121.22				GW04372					134											77.78	0.09		12.35		1.04			0.38	0.06	0.02		4.53	3.71	0
Tian et al. 2015, Geology Magazine		The Southern GXR		46.6827	46.6827	121.22	121.22				GW04373					134											77.41	0.1		12.22		1.08			0.43	0.06	0.03		4.53	3.78	0
Jiang et al., 2017, JAES		The Southern GXR		44.3333	44.3333	118.633	118.633				750-21-12					137											66.99	0.36		15.16				3.01433	1.58	0.32	0.09		5.99	4.6	0.06
Jiang et al., 2017, JAES		The Southern GXR		44.3333	44.3333	118.633	118.633				750-21-3					129											76.64	0.06		11.77				0.971784	0.88	0.19	0.04		4.17	3.51	0.01
Jiang et al., 2017, JAES		The Southern GXR		44.3333	44.3333	118.633	118.633				750-21-6					129											77.33	0.06		12.1				0.94479	0.44	0.08	0.05		5.23	2.28	0.01
Jiang et al., 2017, JAES		The Southern GXR		44.3333	44.3333	118.633	118.633				750-25-9					129											77.51	0.07		12.22				0.998778	0.26	0.07	0.04		4.86	2.54	0.01
Jiang et al., 2017, JAES		The Southern GXR		44.3333	44.3333	118.633	118.633				BY13-19					137											67.64	0.35		15.59				2.39347	1.24	0.27	0.06		6.55	4.37	0.06
Jiang et al., 2017, JAES		The Southern GXR		44.3333	44.3333	118.633	118.633				BY13-20					137											67.5	0.36		15.51				2.78038	1.38	0.29	0.06		6.15	4.65	0.06
Jiang et al., 2017, JAES		The Southern GXR		44.3333	44.3333	118.633	118.633				BY13-21					137											64.79	0.52		16.41				4.28305	2.07	0.48	0.08		5.43	4.51	0.11
Jiang et al., 2017, JAES		The Southern GXR		44.3333	44.3333	118.633	118.633				BY13-22					129											75.3	0.05		11.61				0.85481	1.24	0.08	0.06		6.64	1.75	0.01
Jiang et al., 2017, JAES		The Southern GXR		44.3333	44.3333	118.633	118.633				BY13-49					137											66.81	0.39		15.65				2.06054	2.88	0.34	0.23		5.84	4.74	0.07
Jiang et al., 2017, JAES		The Southern GXR		44.3333	44.3333	118.633	118.633				BY13-50					129											77.64	0.07		12				0.998778	0.48	0.08	0.05		4.77	2.25	0.01
Jiang et al., 2017, JAES		The Southern GXR		44.3333	44.3333	118.633	118.633				BY13-51					129											76.85	0.06		11.52				1.02577	0.88	0.08	0.06		6.4	1.02	0.01
Jiang et al., 2017, JAES		The Southern GXR		44.3333	44.3333	118.633	118.633				BY13-6					137											67.94	0.36		15.32				2.42046	1.86	0.29	0.08		6.75	3.7	0.06
Jiang et al., 2017, JAES		The Southern GXR		44.3333	44.3333	118.633	118.633				BY13-8					128											55.35	0.94		16.72				6.21762	5.1	2.64	0.13		3.28	4.24	0.3
Jiang et al., 2017, JAES		The Southern GXR		44.3333	44.3333	118.633	118.633				BY750-21- 1					136											67.53	0.35		15.15				3.32026	1.56	0.39	0.14		5.41	5.38	0.06
Jiang et al., 2017, JAES		The Southern GXR		44.3333	44.3333	118.633	118.633				BY750-21-3					140											62.32	0.34		14.82				4.31904	4.59	0.38	0.41		10.71	1.12	0.06
Jiang et al., 2017, JAES		The Southern GXR		44.3333	44.3333	118.633	118.633				BY750-21-5					136											58.66	0.49		17.42				3.17629	5.44	0.66	0.5		10.79	1.05	0.1
Jiang et al., 2017, JAES		The Southern GXR		44.3333	44.3333	118.633	118.633				BY750-21-9					138											77.78	0.13		11.51				1.46667	1.23	0.38	0.15		0.25	6.22	0.02
Jiang et al., 2017, JAES		The Southern GXR		44.3333	44.3333	118.633	118.633				BY750-23					138											71.54	0.22		12.76				1.41269	1.64	0.23	0.12		8.56	1.36	0.03
Gao et al. 2013, Acta Geologica Sinica		The Nouthern GXR		47.1764	47.1764	122.212	122.212				Z10-2					127											76.89	0.08		12.9		0.02	0.71	0.727996	0.17	0.01	0.04		4.93	4.24	0.01
Gao et al. 2013, Acta Geologica Sinica		The Nouthern GXR		47.1744	47.1744	122.182	122.182				Z10-3					126											71.11	0.3		14.99		1.45	0.93	2.23471	1.96	0.64	0.08		3.76	4.7	0.09
Gao et al. 2013, Acta Geologica Sinica		The Nouthern GXR		47.1744	47.1744	122.182	122.182				Z10-4					131											60.66	0.96		17.29		3.26	3.03	5.96335	5.26	2.52	0.13		2.23	4.4	0.26
Gao et al. 2013, Acta Geologica Sinica		The Nouthern GXR		47.0944	47.0944	122.05	122.05				Z10-5					130											73.8	0.22		14.3		0.69	0.68	1.30086	1.21	0.41	0.03		4.58	4.02	0.05
Hao et al. 2015, JAES		The Nouthern GXR		50.3831	50.3831	125.656	125.656				SKG-2-1					176.1											66.11	0.51		16.04				3.77916	3.29	1.56	0.1		2.89	4.28	0.16
Hao et al. 2015, JAES		The Nouthern GXR		50.3831	50.3831	125.656	125.656				SKG-2-2					176.1											65.8	0.55		15.42				4.11209	3.16	1.68	0.12		3.01	4.07	0.17
Hao et al. 2015, JAES		The Nouthern GXR		50.3831	50.3831	125.656	125.656				SKG-2-3					176.1											65.66	0.53		16.09				4.35503	3.22	1.59	0.13		2.8	4.26	0.17
Hao et al. 2015, JAES		The Nouthern GXR		50.3831	50.3831	125.656	125.656				SKG-2-4					176.1											65.37	0.52		15.57				3.70718	3.12	1.56	0.1		3.22	4.14	0.16
Hao et al. 2015, JAES		The Nouthern GXR		50.3831	50.3831	125.656	125.656				SKG-2-5					176.1											64.98	0.55		15.45				4.43601	2.67	1.63	0.1		4.18	3.65	0.17
Hao et al. 2015, JAES		The Nouthern GXR		50.3831	50.3831	125.656	125.656				SKG-2-6					176.1											66.32	0.52		15.5				3.6082	3.06	1.57	0.11		3.08	4.11	0.16
Hao et al. 2015, JAES		The Nouthern GXR		50.3831	50.3831	125.656	125.656				SKG-2-7					176.1											66.27	0.54		15.63				4.21106	3.14	1.64	0.13		3.15	4.05	0.18
Hao et al. 2015, JAES		The Nouthern GXR		50.3831	50.3831	125.656	125.656				SKG-2-8					176.1											66.85	0.53		15.67				3.40124	2.97	1.5	0.1		3.2	4.08	0.16
Huang et al. 2014, Acta Geologica Sinica		The Nouthern GXR		49.6033	49.6033	124.239	124.239				ZK801-YQ2					134.15											69.13	0.32		14.97		0.62	1.17	1.72788	1.83	0.65	0.05		3.52	4.37	0.12
Huang et al. 2014, Acta Geologica Sinica		The Nouthern GXR		49.6033	49.6033	124.239	124.239				ZK3719-YQ1					133.9											68.72	0.37		15.89		0.79	1.06	1.77084	1.71	0.69	0.03		3.66	4.81	0.14
Huang et al. 2014, Acta Geologica Sinica		The Nouthern GXR		49.6033	49.6033	124.239	124.239				ZK1302-YQ1					132.43											72.67	0.22		13.53		0.45	0.63	1.03491	1.68	0.39	0.07		5.13	1.47	0.04
He et al. 2017, Global Geology		The Nouthern GXR		48.4667	48.4667	121.817	121.817				13GW258					137											72.36	0.29		14.04		1.87	0.72	2.40263	1.1	0.48	0.07		4.56	4.28	0.09
He et al. 2017, Global Geology		The Nouthern GXR		48.4667	48.4667	121.817	121.817				13GW262					132											72.86	0.39		14.13		1.7	0.57	2.09966	0.37	0.31	0.08		3.79	5.15	0.08
Dong et al., 2014, Lithos		The Central GXR		46.7725	46.7725	120.314	120.314				D2243-1-1					132											65.97	0.62		16.3		1.84296	1.5	3.1583	1.44	1.07	0.1		3.59	4.94	0.19
Dong et al., 2014, Lithos		The Central GXR		46.7725	46.7725	120.314	120.314				PM012-2-1					132											67.02	0.6		15.66		2.36648	0.75	2.87936	2.59	1.11	0.08		3.57	4.4	0.21
Dong et al., 2014, Lithos		The Central GXR		46.7725	46.7725	120.314	120.314				D2282-2-1					132											67.67	0.63		15.33		1.62626	1.65	3.11331	2.56	1.24	0.08		3.87	4.21	0.18
Dong et al., 2014, Lithos		The Central GXR		46.7725	46.7725	120.314	120.314				D0574-1					132											68.22	0.57		15.39		1.75967	1.35	2.93335	1.23	1.02	0.09		3.9	4.47	0.18
Dong et al., 2014, Lithos		The Central GXR		46.7725	46.7725	120.314	120.314				D2224-1-1					132											68.54	0.61		15.62		3.15216	0.25	3.08631	0.53	0.81	0.06		3.65	4.17	0.17
Dong et al., 2014, Lithos		The Central GXR		46.7725	46.7725	120.314	120.314				PM011-19-1					132											68.69	0.3		14.62		1.36319	0.6	1.82659	2.06	0.58	0.09		4.72	3.42	0.09
Dong et al., 2014, Lithos		The Central GXR		46.7725	46.7725	120.314	120.314				PM004-17-1					132											69.72	0.49		15.15		0.817395	1.55	2.28549	1.26	0.73	0.13		4.02	4.22	0.15
Dong et al., 2014, Lithos		The Central GXR		46.7725	46.7725	120.314	120.314				D2252-2-1					132											70.15	0.32		15.1		1.17421	0.95	2.00655	0.93	0.68	0.07		4.98	3.77	0.12
Dong et al., 2014, Lithos		The Central GXR		46.7725	46.7725	120.314	120.314				PM011-31-1					132											71.14	0.31		14.6		1.20762	0.65	1.73661	1.12	0.61	0.08		3.87	4.46	0.13
Dong et al., 2014, Lithos		The Central GXR		46.7725	46.7725	120.314	120.314				PM011-20-1					132											72.49	0.31		14.12		1.34319	0.6	1.8086	0.69	0.65	0.08		3.19	4.14	0.08
Dong et al., 2014, Lithos		The Central GXR		46.7725	46.7725	120.314	120.314				D2727-1-1					132											73.25	0.32		14.05		1.62773	0.2	1.66463	0.31	0.34	0.03		4.77	3.27	0.09
Dong et al., 2014, Lithos		The Central GXR		46.7725	46.7725	120.314	120.314				D1531-1-1					132											73.45	0.15		13.74		1.2033	0.15	1.23273	0.48	0.16	0.07		5.1	3.79	0.03
Dong et al., 2014, Lithos		The Central GXR		46.7725	46.7725	120.314	120.314				PM010-2-1					132											73.93	0.14		13.54		1.1833	0.15	1.21473	1.07	0.41	0.07		3.82	4.43	0.03
Dong et al., 2014, Lithos		The Central GXR		46.7725	46.7725	120.314	120.314				PM006-36-1					132											74.19	0.26		13.38		0.892049	0.7	1.50267	0.75	0.24	0.08		4.36	4.09	0.05
Dong et al., 2014, Lithos		The Central GXR		46.7725	46.7725	120.314	120.314				PM015-1-1					132											74.54	0.3		13.35		0.712049	0.7	1.3407	0.39	0.32	0.04		3.77	4.47	0.08
Dong et al., 2014, Lithos		The Central GXR		46.7725	46.7725	120.314	120.314				PM006-30-1					132											75.52	0.24		13.16		1.18102	0.35	1.41269	1.09	0.41	0.09		3.86	1.67	0.06
Dong et al., 2014, Lithos		The Central GXR		46.7725	46.7725	120.314	120.314				D4076-1-1					132											75.53	0.23		13.17		1.18216	0.25	1.31371	0.4	0.37	0.09		5.11	1.72	0.06
Dong et al., 2014, Lithos		The Central GXR		46.7725	46.7725	120.314	120.314				PM006-37-1					132											77.29	0.17		12.02		0.307617	0.65	0.926794	0.44	0.24	0.09		4.72	2.77	0.04
Dong et al., 2014, Lithos		The Central GXR		46.7725	46.7725	120.314	120.314				D0570-5					132											77.41	0.15		12.68		0.457728	0.2	0.611864	0.13	0.11	0.05		4.01	3.77	0.02
Dong et al., 2014, Lithos		The Central GXR		46.7725	46.7725	120.314	120.314				PM002-18-1					132											78.27	0.13		12.47		0.275457	0.4	0.647856	0.12	0.32	0.04		4.38	2.07	0.02
Dong et al., 2014, Lithos		The Central GXR		46.7725	46.7725	120.314	120.314				PM011-21-1					132											78.49	0.08		11.62		0.576593	0.3	0.818818	0.31	0.08	0.05		3.8	3.85	0.01
Dong et al., 2014, Lithos		The Central GXR		46.7725	46.7725	120.314	120.314				D0010-9					132											79.72	0.11		10.88		0.377728	0.2	0.53988	0.1	0.15	0.03		6.94	0.36	0.01
Sun et al. 2016, Global Geology		The Nouthern GXR		51.6167	51.6167	124.333	124.333				1561-2					141.1											61.78	0.97		16.4		5.04			3.83	2.14	0.08		3.49	5.11	0.28
Sun et al. 2016, Global Geology		The Nouthern GXR		51.6167	51.6167	124.333	124.333				1558-3					135.2											62.22	0.84		16.64		4.62			3.75	1. 87	0.09		3.39	5.08	0.26
Sun et al. 2016, Global Geology		The Nouthern GXR		51.6167	51.6167	124.333	124.333				1562-2					123.8											67.29	0.39		15.84		2.83			2.55	0. 82	0.09		3.68	4.8	0.14
Li et al., 2018, Lithos		The Nouthern GXR		46.5822	46.5822	121.292	121.292				15DX15-1					177											72.18	0.28		14.59				1.69162	1.77	0.64	0.08		2.72	4.4	0.12
Li et al., 2018, Lithos		The Nouthern GXR		46.5822	46.5822	121.292	121.292				15DX15-2					177											71.16	0.31		15.09				1.82659	1.88	0.7	0.08		3.06	4.31	0.15
Li et al., 2018, Lithos		The Nouthern GXR		46.5822	46.5822	121.292	121.292				15DX15-4					177											71.28	0.3		14.93				1.7906	1.86	0.69	0.08		2.86	4.47	0.14
Li et al., 2018, Lithos		The Nouthern GXR		46.5822	46.5822	121.292	121.292				15DX15-5					177											72.44	0.26		14.72				1.51166	1.81	0.57	0.07		2.93	4.3	0.12
Li et al., 2018, Lithos		The Nouthern GXR		48.2633	48.2633	123.442	123.442				13XA33-1					175											76.24	0.14		13.27				0.53988	0.41	0.083	0.01		4.45	3.99	0.025
Li et al., 2018, Lithos		The Nouthern GXR		48.2633	48.2633	123.442	123.442				13XA33-2					175											76.55	0.14		13.4				0.287936	0.28	0.066	0.01		4.46	4.12	0.03
Li et al., 2018, Lithos		The Nouthern GXR		50.3831	50.3831	125.653	125.653				16ER43-4					174											66.02	0.52		16.17				3.88714	3.22	1.68	0.07		2.74	4.37	0.11
Li et al., 2018, Lithos		The Nouthern GXR		50.3831	50.3831	125.653	125.653				16ER43-5					174											66.26	0.52		16.24				3.63519	3.24	1.64	0.06		2.64	4.43	0.08
Li et al., 2018, Lithos		The Nouthern GXR		48.5656	48.5656	123.03	123.03				16DX10-2					168											77.19	0.15		12.41				0.800822	0.62	0.14	0.02		3.94	3.85	0.02
Li et al., 2018, Lithos		The Nouthern GXR		48.5656	48.5656	123.03	123.03				16DX10-3					168											76.54	0.12		12.84				0.683848	0.58	0.12	0.01		4.33	3.89	0.02
Li et al., 2018, Lithos		The Nouthern GXR		46.3325	46.3325	120.693	120.693				16DX3-1					135											76.63	0.16		12.81				0.791824	0.14	0.03	0.02		4.1	4.3	0.01
Li et al., 2018, Lithos		The Nouthern GXR		46.3325	46.3325	120.693	120.693				16DX3-2					135											77.39	0.16		12.64				0.49489	0.12	0.03	0.02		3.86	4.28	0.01
Li et al., 2018, Lithos		The Nouthern GXR		47.7067	47.7067	122.597	122.597				16DX5-1					132											77.37	0.1		12.54				0.62986	0.4	0.05	0.07		4.12	4.15	0.01
Li et al., 2018, Lithos		The Nouthern GXR		47.7067	47.7067	122.597	122.597				16DX5-4					132											77.88	0.086		12.38				0.557876	0.35	0.04	0.07		4.24	4.05	0.01
Pan et al. 2012, Master's Dissertation		The Southern GXR		43.5625	43.5625	118.877	118.877				GL01-1					143.9											68.04	0.316		15.61		2.62	1.95	4.30748	2.04	0.92	0.06		5.47	3.95	0.118
Pan et al. 2012, Master's Dissertation		The Southern GXR		43.5625	43.5625	118.877	118.877				GL01-2					143.7											70.46	0.366		14.2		2.99	1.5	4.1904	2.54	1.07	0.068		3.31	4.21	0.124
Pan et al. 2012, Master's Dissertation		The Southern GXR		43.5625	43.5625	118.877	118.877				GL01-3					143.3											70.53	0.314		14.39		2.5	1.25	3.4995	2.12	0.918	0.058		4.3	4.06	0.108
Pan et al. 2012, Master's Dissertation		The Southern GXR		43.5625	43.5625	118.877	118.877				GL01-4					143											69.77	0.377		14.7		2.98	1.05	3.7314	2.7	1.1	0.069		3.08	4.44	0.128
Pan et al. 2012, Master's Dissertation		The Southern GXR		43.5625	43.5625	118.877	118.877				GL02-1					137											71.2	0.35		14.97		2.07	0.9	2.76259	0.418	0.49	0.07		4.41	4.7	0.103
Pan et al. 2012, Master's Dissertation		The Southern GXR		43.5625	43.5625	118.877	118.877				GL02-3					136.5											71.11	0.362		14.96		2.1	0.7	2.58958	0.444	0.492	0.062		4.41	4.79	0.105
Tan et al., 2017, Geological Bulletin of China		The Central GXR		46.6667	46.6667	121.5	121.5				P23-26-1					127											77.15	0.08		11.83		0.56	0.08	0.583888	0.11	0.1	0.03		8.29	1.03	0.02
Tan et al., 2017, Geological Bulletin of China		The Central GXR		46.6667	46.6667	121.5	121.5				P23-26-2					127											79.94	0.05		10.49		1.01	0.13	1.0388	0.17	0.17	0.07		4.82	1.6	0.02
Tan et al., 2017, Geological Bulletin of China		The Central GXR		46.6667	46.6667	121.5	121.5				P24-4-2		123	133		128											75.96	0.12		13		1.06	0.29	1.24379	0.31	0.4	0.03		3.93	3.38	0.04
Tan et al., 2017, Geological Bulletin of China		The Central GXR		46.6667	46.6667	121.5	121.5				P24-5-1		123	133		128											75.05	0.15		13.49		1.36	0.17	1.39373	0.36	0.23	0.02		4.6	2.93	0.06
Tan et al., 2017, Geological Bulletin of China		The Central GXR		46.6667	46.6667	121.5	121.5				P18-3-1					133											74.72	0.2		13.06		1.26	0.55	1.68375	1.77	0.31	0.05		2.93	3.9	0.08
Tan et al., 2017, Geological Bulletin of China		The Central GXR		46.6667	46.6667	121.5	121.5				P15-17-1		123	133		128											69.63	0.44		15.26		1.6	1.15	2.58968	0.69	0.36	0.08		4.57	4.78	0.09
Tan et al., 2017, Geological Bulletin of China		The Central GXR		46.6667	46.6667	121.5	121.5				P2-1-1		123	133		128											72.88	0.23		13.77		2.65	0.75	3.13447	0.33	0.2	0.05		4.61	4.59	0.05
Tan et al., 2017, Geological Bulletin of China		The Central GXR		46.6667	46.6667	121.5	121.5				PB3073		123	133		128											75.28	0.14		13.61		1.15	0.69	1.72477	0.17	0.19	0.04		4.36	3.66	0.04
Tan et al., 2017, Geological Bulletin of China		The Central GXR		46.6667	46.6667	121.5	121.5				AB9145-3		123	133		128											76.19	0.14		13.18		1.07	0.08	1.04279	0.19	0.16	0.05		4.44	3.25	0.03
Tan et al., 2017, Geological Bulletin of China		The Central GXR		46.6667	46.6667	121.5	121.5				PB9012		123	133		128											76.6	0.14		12.49		1.06	0.17	1.12379	0.22	0.08	0.03		5.42	2.82	0.02
Tan et al., 2017, Geological Bulletin of China		The Central GXR		46.6667	46.6667	121.5	121.5				PB4061		123	133		128											74.84	0.1		13.96		1.14	0.55	1.57577	0.15	0.17	0.01		4.67	3.64	0.03
Sun 2012, Master's Dissertation		The Southern GXR		43.8607	43.8607	118.576	118.576				CG01					137.1											67.09	0.532		15.06		4.06	1.7	5.35319	3.5	1.71	0.08		2.88	4.29	0.16
Sun 2012, Master's Dissertation		The Southern GXR		43.8607	43.8607	118.576	118.576				CG02					136.1											67.8	0.514		14.63		3.89	2	5.50022	3.13	1.6	0.079		3.02	4.21	0.15
Ji et al. 2016, Global Geology		The Central GXR		47.9828	47.9828	121.197	121.197				13GW349					143											74.48	0.24		13.11		0.55	0.92	1.41489	0.74	0.39	0.07		4.67	4.05	0.07
Ji et al. 2016, Global Geology		The Central GXR		47.9828	47.9828	121.197	121.197				13GW375					141											67.23	0.82		15.02		2.11	1.57	3.46858	2.55	1.14	0.13		3.74	4.66	0.24
Ji 2017, Master's Dissertation		The Central GXR		46.7688	46.7688	120.304	120.304				PM005-1-1					143											70.62	0.43		14.5		2.31	0.45	2.52854	1.39	0.44	0.06		3.66	4.44	0.12
Ji 2017, Master's Dissertation		The Central GXR		46.7688	46.7688	120.304	120.304				PM012-1-1					141											75.85	0.14		12.98		0.9	0.1	0.90982	0.1	0.21	0.01		4.73	2.74	0.04
Ge et al. 2007, Chinese Science Bulletin		The Nouthern GXR		50.25	50.25	125.75	125.75				GW04512					177											65.88	0.52		15.73				3.78816	3.57	1.75	0.07		2.87	4.42	0.17
Ge et al. 2007, Chinese Science Bulletin		The Nouthern GXR		50.25	50.25	125.75	125.75				GW04516					176											66.83	0.49		15.5				3.77916	3.37	1.6	0.08		2.77	4.27	0.18
Ge et al. 2007, Chinese Science Bulletin		The Nouthern GXR		50.25	50.25	125.75	125.75				GW04530					170											67.26	0.53		15.26				2.06954	2.17	1.31	0.02		4.31	3.49	0.17
Ge et al. 2007, Chinese Science Bulletin		The Nouthern GXR		50.25	50.25	125.75	125.75				GW04542					178											71.61	0.29		14.47				2.44746	2.08	0.81	0.07		3.66	3.98	0.08
Chen et al. 2015, Geology In China		The Southern GXR		45.6238	45.6238	121.722	121.722				TW03-1					131.3											77.26	0.08		12.13				0.728838	0.37	0.08	0.02		4.34	3.44	0.11
Chen et al. 2015, Geology In China		The Southern GXR		45.6238	45.6238	121.722	121.722				TW06-2					130.5											73.09	0.23		14.24				1.65563	0.4	0.33	0.03		4.55	4.19	0.11
Dai et al. 2013, Geology In China		The Nouthern GXR		48.5261	48.5261	123.072	123.072				D1198					172											59.83	1		16.05		2.58	3.95	6.27148	5.65	2.84	0.092		3.09	3.96	0.21
Dai et al. 2013, Geology In China		The Nouthern GXR		48.5261	48.5261	123.072	123.072				D1236					154											72.35	0.3		13.65		0.72	1.89	2.53786	1.52	0.51	0.076		4.33	4.25	0.09
Du et al. 2017, Global Geology		The Southern GXR		46.6667	46.6667	121.5	121.5				P18-3-2					132											69.63	0.43		15.64		2.64	0.58	2.95547	1.32	0.27	0.05		0.9	7.44	0.18
Du et al. 2017, Global Geology		The Southern GXR		46.6667	46.6667	121.5	121.5				PB2060					130											58.22	0.86		17.35		6.97	0.91	7.18161	5.63	3.26	0.14		1.62	3.77	0.26
[truncated: 122 more columns]

## Sheet: Erguna Rgeion (EGN)
CITATIONS	TECTONIC SETTING	LOCATION	LOCATION COMMENT	LATITUDE MIN	LATITUDE MAX	LONGITUDE MIN	LONGITUDE MAX	LAND OR SEA	ELEVATION MIN	ELEVATION MAX	SAMPLE NAME	ROCK NAME	MIN. AGE (YRS.)	MAX. AGE (YRS.)	GEOL.	AGE	ERUPTION DAY	ERUPTION MONTH	ERUPTION YEAR	ROCK TEXTURE	ROCK TYPE	DRILL DEPTH MIN	DRILL DEPTHAX	ALTERATION	MINERAL	MATERIAL	SIO2(WT%)	TIO2(WT%)	B2O3(WT%)	AL2O3(WT%)	CR2O3(WT%)	FE2O3(WT%)	FEO(WT%)	FEOT(WT%)	CAO(WT%)	MGO(WT%)	MNO(WT%)	NIO(WT%)	K2O(WT%)	NA2O(WT%)	P2O5(WT%)	H2O(WT%)	H2OP(WT%)	H2OM(WT%)	H2OT(WT%)	CO2(WT%)	CO1(WT%)	F(WT%)	CL(WT%)
Gou et al. 2010, Acta Petrologica Sinica			The Erguna Massif	49.543	49.543	116.745	116.745				M132-1					141											73.78	0.11		13.77				1.17874	0.35	0.21	0.01		5.01	3.54	0.02
Gou et al. 2010, Acta Petrologica Sinica			The Erguna Massif	49.5022	49.5022	117.191	117.191				M138-1					141											75.74	0.25		12.5				0.872806	0.11	0.11	0.02		5.26	3.99	0.02
Gou et al. 2010, Acta Petrologica Sinica			The Erguna Massif	48.6204	48.6204	116.817	116.817				M054-6					141											79.15	0.07		11.09				0.566874	0.33	0.07	0.01		4.43	3.34	0.02
Zhang et al. 2015, Geological Bulletin of China			The Erguna Massif	48.7	48.7	116.4	116.4				K11j-3					151											76.1	0.19		12.2		1.05399	1.85	2.79838	0.78	0.25	0.02		4.86	3.7	0.04
Zhang et al. 2015, Geological Bulletin of China			The Erguna Massif	48.7	48.7	116.4	116.4				K11j-1					132											68.48	0.44		14.87		0.497595	0.74	1.18774	0.93	0.63	0.07		5.77	3.79	0.1
Tang et al. 2016, Gondwana Research			The Erguna Massif	52.2067	52.2067	121.653	121.653				12ER34-1					206											71.71	0.31		14.59				2.06054	1.3	0.41	0.04		5.14	3.77	0.07
Tang et al. 2016, Gondwana Research			The Erguna Massif	52.2067	52.2067	121.653	121.653				12ER34-2					206											71.37	0.3		14.94				1.90758	1.37	0.4	0.04		4.8	3.98	0.06
Tang et al. 2016, Gondwana Research			The Erguna Massif	52.2067	52.2067	121.653	121.653				12ER34-3					206											71.64	0.29		14.68				1.86259	1.2	0.38	0.05		5.19	3.76	0.06
Tang et al. 2016, Gondwana Research			The Erguna Massif	51.3539	51.3539	120.308	120.308				11ER26-2					206											69.37	0.3		15.82				2.16852	2.51	0.63	0.52		3.52	3.84	0.1
Tang et al. 2016, Gondwana Research			The Erguna Massif	51.3539	51.3539	120.308	120.308				11ER26-3					206											70.24	0.26		15.37				1.91657	2.33	0.54	0.01		3.74	3.68	0.08
Tang et al. 2016, Gondwana Research			The Erguna Massif	51.3539	51.3539	120.308	120.308				12ER15-1					206											70.76	0.27		15.22				2.06954	2.37	0.61	0.05		3.43	3.9	0.09
Tang et al. 2016, Gondwana Research			The Erguna Massif	51.3539	51.3539	120.308	120.308				12ER15-2					206											71.25	0.26		14.9				1.97956	2.44	0.6	0.05		3.34	3.92	0.08
Tang et al. 2016, Gondwana Research			The Erguna Massif	51.3183	51.3183	120.367	120.367				12ER16-1					206											69.68	0.32		15.63				2.38447	2.79	0.78	0.05		3.05	3.88	0.11
Tang et al. 2016, Gondwana Research			The Erguna Massif	51.3183	51.3183	120.367	120.367				12ER16-2					206											69.49	0.32		15.44				2.35748	2.69	0.78	0.05		3.44	3.78	0.11
Tang et al. 2016, Gondwana Research			The Erguna Massif	51.3183	51.3183	120.367	120.367				11ER27-1					206											66.25	0.34		16.74				2.42946	3.57	1.04	0.06		3.49	3.86	0.12
Tang et al. 2016, Gondwana Research			The Erguna Massif	51.3183	51.3183	120.367	120.367				11ER27-2					206											67.76	0.34		16.04				2.42046	2.9	0.82	0.55		3.38	3.8	0.12
Tang et al. 2016, Gondwana Research			The Erguna Massif	51.3131	51.3131	120.429	120.429				12ER17-2					205											70.5	0.27		14.85				2.11453	1.95	0.63	0.05		3.61	3.96	0.08
Tang et al. 2016, Gondwana Research			The Erguna Massif	51.3131	51.3131	120.429	120.429				12ER17-3					205											71.28	0.25		14.76				1.97056	2.2	0.6	0.05		3.15	4.02	0.08
Tang et al. 2016, Gondwana Research			The Erguna Massif	51.3131	51.3131	120.429	120.429				12ER17-5					205											72.3	0.25		14.25				1.97056	2.14	0.6	0.05		3.24	3.74	0.07
Tang et al. 2016, Gondwana Research			The Erguna Massif	51.4892	51.4892	120.813	120.813				12ER19-1					205											74.37	0.2		13.55				1.74561	1.28	0.34	0.02		3.74	3.78	0.06
Tang et al. 2016, Gondwana Research			The Erguna Massif	51.4892	51.4892	120.813	120.813				12ER19-2					205											74.41	0.19		13.47				1.62864	1.3	0.3	0.02		3.96	3.67	0.06
Tang et al. 2016, Gondwana Research			The Erguna Massif	51.4892	51.4892	120.813	120.813				12ER19-3					205											75.11	0.19		13.18				1.59265	1.18	0.32	0.02		3.94	3.69	0.05
Tang et al. 2016, Gondwana Research			The Erguna Massif	51.4892	51.4892	120.813	120.813				12ER19-4					205											74.09	0.18		13.8				1.52966	1.16	0.29	0.02		4.24	3.82	0.04
Tang et al. 2016, Gondwana Research			The Erguna Massif	52.0436	52.0436	120.863	120.863				13ER34-1					204											46.55	0.18		24.35				3.95012	15	6.25	0.07		0.19	1.37	0.02
Tang et al. 2016, Gondwana Research			The Erguna Massif	52.0436	52.0436	120.863	120.863				13ER34-2					204											46.54	0.19		23.24				4.36403	14.73	6.82	0.08		0.25	1.23	0.02
Tang et al. 2016, Gondwana Research			The Erguna Massif	52.0436	52.0436	120.863	120.863				13ER34-3					204											46.5	0.2		23.2				4.45401	14.68	6.96	0.08		0.21	1.22	0.02
Tang et al. 2016, Gondwana Research			The Erguna Massif	52.0436	52.0436	120.863	120.863				13ER34-4					204											46.16	0.2		23.63				4.31004	14.73	6.8	0.08		0.23	1.22	0.02
Tang et al. 2016, Gondwana Research			The Erguna Massif	51.6714	51.6714	121.535	121.535				13ER8-1					204											51.63	1.38		15.71				9.53788	7.24	5.34	0.16		1.68	3.65	0.31
Tang et al. 2016, Gondwana Research			The Erguna Massif	51.6714	51.6714	121.535	121.535				13ER8-2					204											47.68	1.83		17.45				11.8864	8.28	4.93	0.17		1.12	3.46	0.38
Tang et al. 2016, Gondwana Research			The Erguna Massif	51.6714	51.6714	121.535	121.535				13ER8-4					204											47.63	1.88		16.99				12.2103	8.49	4.97	0.18		1.07	3.44	0.37
Tang et al. 2016, Gondwana Research			The Erguna Massif	51.6714	51.6714	121.535	121.535				13ER8-5					204											48.04	1.86		17.18				11.8864	8.35	4.79	0.17		1.12	3.53	0.36
Tang et al. 2016, Gondwana Research			The Erguna Massif	51.6714	51.6714	121.535	121.535				13ER8-6					204											56.06	0.89		16.28				7.52233	7.39	5.27	0.12		1.06	3.12	0.16
Tang et al. 2016, Gondwana Research			The Erguna Massif	51.6714	51.6714	121.535	121.535				13ER8-7					204											55.48	0.93		16.14				7.6663	7.48	5.34	0.12		0.94	3.08	0.18
Tang et al. 2016, Gondwana Research			The Erguna Massif	51.6714	51.6714	121.535	121.535				13ER8-10					204											52.4	1		16.45				8.47612	8	6.37	0.13		1.21	2.96	0.2
Tang et al. 2016, Gondwana Research			The Erguna Massif	50.7436	50.7436	119.532	119.532				12ER9-1					202											70.88	0.45		13.25				2.79838	1.9	0.71	0.05		2.79	3.49	0.12
Tang et al. 2016, Gondwana Research			The Erguna Massif	50.7436	50.7436	119.532	119.532				12ER9-2					202											69.35	0.36		13.61				2.2315	2.77	0.55	0.05		2.56	4.04	0.1
Tang et al. 2016, Gondwana Research			The Erguna Massif	52.4192	52.4192	122.567	122.567				12ER30-5					200											52.14	1.83		15.49				10.8246	6.6	4.29	0.13		1.1	3.76	0.25
Tang et al. 2016, Gondwana Research			The Erguna Massif	52.4192	52.4192	122.567	122.567				12ER30-6					200											53.09	1.73		15.77				10.0778	6.67	4.13	0.12		1.09	3.79	0.25
Tang et al. 2016, Gondwana Research			The Erguna Massif	52.4192	52.4192	122.567	122.567				12ER30-8					200											53.74	1.81		14.9				9.84381	6.11	4.08	0.13		1.25	3.74	0.2
Tang et al. 2016, Gondwana Research			The Erguna Massif	52.4192	52.4192	122.567	122.567				12ER30-9					200											53.97	1.8		15.22				9.85281	6.42	4.03	0.12		1.05	3.54	0.22
Tang et al. 2016, Gondwana Research			The Erguna Massif	51.5786	51.5786	121.76	121.76				12ER27-1					197											69.98	0.38		15.21				2.74439	2.94	1.13	0.05		1.88	4.3	0.12
Tang et al. 2016, Gondwana Research			The Erguna Massif	51.5786	51.5786	121.76	121.76				12ER27-2					197											68.53	0.42		15.86				2.77138	2.32	0.93	0.05		2.7	4.52	0.12
Tang et al. 2016, Gondwana Research			The Erguna Massif	51.5786	51.5786	121.76	121.76				12ER27-3					197											68.49	0.47		15.67				3.31126	2.91	1.03	0.06		2.08	4.32	0.14
Tang et al. 2016, Gondwana Research			The Erguna Massif	51.5786	51.5786	121.76	121.76				12ER27-4					197											68.89	0.38		16.21				2.66341	2.27	0.86	0.05		2.2	4.7	0.11
Tang et al. 2016, Gondwana Research			The Erguna Massif	51.365	51.365	121.508	121.508				12ER24-1					197											68.76	0.31		15.88				2.98734	0.86	0.34	0.14		3.23	5.8	0.08
Tang et al. 2016, Gondwana Research			The Erguna Massif	51.365	51.365	121.508	121.508				12ER24-2					197											69.89	0.24		15.59				2.50144	0.86	0.29	0.12		3.3	5.76	0.07
Tang et al. 2016, Gondwana Research			The Erguna Massif	51.365	51.365	121.508	121.508				12ER24-3					197											68.61	0.33		15.89				3.31126	0.99	0.38	0.16		3.42	5.65	0.08
Tang et al. 2016, Gondwana Research			The Erguna Massif	51.3436	51.3436	121.504	121.504				12ER23-1					196											75.21	0.12		13.34				1.06176	0.78	0.15	0.05		4.2	4.29	0.03
Tang et al. 2016, Gondwana Research			The Erguna Massif	51.3436	51.3436	121.504	121.504				12ER23-2					196											75.37	0.12		13.17				1.07076	0.54	0.15	0.05		4.23	4.2	0.03
Tang et al. 2016, Gondwana Research			The Erguna Massif	51.3436	51.3436	121.504	121.504				12ER23-3					196											75.16	0.12		13.34				1.02577	0.53	0.13	0.05		4.3	4.23	0.03
Tang et al. 2016, Gondwana Research			The Erguna Massif	51.3117	51.3117	120.966	120.966				13ER21-1					195											64.34	0.56		17.16				3.95912	3.63	1.43	0.06		1.77	4.47	0.22
Tang et al. 2016, Gondwana Research			The Erguna Massif	51.3117	51.3117	120.966	120.966				13ER21-5					195											57.13	0.94		17.23				6.16363	6.58	3.9	0.1		1.59	3.79	0.19
Tang et al. 2016, Gondwana Research			The Erguna Massif	50.6433	50.6433	120.161	120.161				11ER1-2					186											76.61	0.05		11.9				0.791824	0.75	0.3	0.01		4.57	3.01	0.02
Tang et al. 2016, Gondwana Research			The Erguna Massif	50.6433	50.6433	120.161	120.161				11ER1-3					186											75.59	0.06		12				0.791824	1.44	0.58	0.01		4.57	3.09	0.02
Tang et al. 2016, Gondwana Research			The Erguna Massif	50.6433	50.6433	120.161	120.161				11ER1-4					186											76.64	0.06		12.33				0.710842	0.21	0.08	0.01		4.69	2.86	0.02
Tang et al. 2016, Gondwana Research			The Erguna Massif	50.6433	50.6433	120.161	120.161				11ER1-5					186											76.77	0.06		12.37				0.692846	0.16	0	0.01		4.55	3.32	0.02
Tang et al. 2016, Gondwana Research			The Erguna Massif	49.4181	49.4181	117.319	117.319				MZ18-2					180											74.4	0.24		13.28				1.73661	0.94	0.35	0.06		3.91	4.26	0.05
Tang et al. 2016, Gondwana Research			The Erguna Massif	49.4181	49.4181	117.319	117.319				12MZ2-1					180											74.34	0.25		13.38				1.58365	0.9	0.32	0.05		4.03	4.13	0.05
Tang et al. 2016, Gondwana Research			The Erguna Massif	49.4181	49.4181	117.319	117.319				12MZ2-2					180											74.15	0.23		13.52				1.43968	0.95	0.3	0.05		3.99	4.26	0.05
Tang et al. 2016, Gondwana Research			The Erguna Massif	49.4181	49.4181	117.319	117.319				12MZ2-3					180											74.12	0.23		13.64				1.41269	0.85	0.32	0.05		4.1	4.19	0.04
Zhao et al., 2011, Journal of Jilin University		Manzhouli	The Erguna Massif	48.7509	48.7509	116.441	116.441				M003-1	Trachyandensite				161											57.23	1.23		17.04				6.23561	5.98	3.4	0.07		2.35	4.13	0.42
Zhao et al., 2011, Journal of Jilin University		Manzhouli	The Erguna Massif	48.89	48.89	116.349	116.349				M043-2	Basaltic Trachyandesite				161											52.25	2.31		15.43				9.27694	7.1	3.78	0.13		1.7	3.59	1
Zhao et al., 2011, Journal of Jilin University		Manzhouli	The Erguna Massif	48.67	48.67	116.5	116.5				M073-1	Trachyandensite				161											58.37	1.21		15.84				6.32559	5.63	3.05	0.13		3.17	3.99	0.44
Zhao et al., 2011, Journal of Jilin University		Manzhouli	The Erguna Massif	48.8539	48.8539	116.982	116.982				M104-4	Basaltic Trachyandesite				162											53.01	2.27		16.13				8.87203	6.39	3.2	0.09		2.4	3.94	0.96
Zhao et al., 2011, Journal of Jilin University		Manzhouli	The Erguna Massif	48.67	48.67	116.5	116.5				M117-1	Basaltic				162											48.66	1.41		15.31				8.74606	8.18	9.59	0.14		1.57	3.14	0.3
Zhao et al., 2011, Journal of Jilin University		Manzhouli	The Erguna Massif	48.67	48.67	116.5	116.5				M126-1	Basaltic Trachyandesite				162											53.64	1.41		15.83				7.06343	7.59	3.01	0.13		2.34	3.56	0.59
Zhao et al., 2011, Journal of Jilin University		Manzhouli	The Erguna Massif	49.603	49.603	116.681	116.681				M133-1	Basaltic Trachyandesite				164											54.6	1.79		17.06				8.28716	6.43	1.64	0.08		2.41	4.13	0.71
Zhao et al., 2011, Journal of Jilin University		Manzhouli	The Erguna Massif	48.67	48.67	116.5	116.5				M137	Trachyandensite				162											50.29	1.98		15.76				9.18696	7.34	6.34	0.13		1.64	3.61	0.6
Li et al., 2014, Lithos		Lower Tamulangou Fm.	The Erguna Massif	48.855	48.855	116.983	116.983				FK10-98					160											51.89	2.39		17.16				8.98	5.95	2.55	0.13		2.42	4.05	1.19
Li et al., 2014, Lithos		Lower Tamulangou Fm.	The Erguna Massif	49.224	49.224	117.475	117.475				FK10-78					160											53.96	1.9		15.77				8.0892	6.08	3.34	0.1		2.76	3.98	1.07
Li et al., 2014, Lithos		Lower Tamulangou Fm.	The Erguna Massif	50.2089	50.2089	119.647	119.647				FK10-111					160											57.68	1.48		18.46				6.08265	4.32	1.03	0.07		3.08	4.78	0.79
Li et al., 2014, Lithos		Upper Shangkuli Fm.	The Erguna Massif	49.2899	49.2899	117.535	117.535				FK10-80					130											63.96	0.7		16.77				2.57343	2.14	0.94	0.07		4.77	4.53	0.17
Li et al., 2014, Lithos		Upper Shangkuli Fm.	The Erguna Massif	48.622	48.622	116.819	116.819				FK10-104					130											67.56	0.48		14.68				2.57343	1.53	1.21	0.15		3.3	2.67	0.08
Li et al., 2014, Lithos		Upper Shangkuli Fm.	The Erguna Massif	50.2455	50.2455	120.468	120.468				FK10-108					130											70.29	0.22		14.62				1.52966	0.7	0.28	0.07		4.63	4.51	0.06
Li et al., 2014, Lithos		Upper Shangkuli Fm.	The Erguna Massif	49.2932	49.2932	117.542	117.542				FK10-83					136											77.31	0.2		12.39				0.737836	0.08	0.12	0.01		4.77	4.26	0.03
Li et al., 2014, Lithos		Upper Shangkuli Fm.	The Erguna Massif	49.3967	49.3967	117.131	117.131				FK10-90					130											75.36	0.24		12.66				1.3677	0.2	0.28	0.03		4.99	3.78	0.03
Li et al., 2014, Lithos		Upper Shangkuli Fm.	The Erguna Massif	49.3012	49.3012	117.546	117.546				FK10-84					125											77.01	0.2		12.01				0.665852	0.22	0.15	0.01		5.2	3.94	0.03
Tang et al., 2015, Tectonophysics			The Erguna Massif	51.2206	51.2206	119.818	119.818				11ER21-1					155											55.05	0.68		12.58				5.98367	8.75	6.1	0.12		3.48	4.52	1.04
Tang et al., 2015, Tectonophysics			The Erguna Massif	51.2206	51.2206	119.818	119.818				11ER21-2					155											55.64	0.74		12.73				4.9399	8.58	5.85	0.11		3.97	3.75	1.01
Tang et al., 2015, Tectonophysics			The Erguna Massif	51.2206	51.2206	119.818	119.818				11ER21-3					155											54.75	0.73		12.46				5.17385	9.99	6.09	0.12		3.2	3.79	1.18
Tang et al., 2015, Tectonophysics			The Erguna Massif	51.2206	51.2206	119.818	119.818				11ER21-5					155											54.31	0.78		12.55				5.16485	9.7	6.23	0.11		3.01	4.1	1.01
Tang et al., 2015, Tectonophysics			The Erguna Massif	50.7797	50.7797	119.529	119.529				12ER8-1					140											71.59	0.37		14.41				1.88958	1.38	0.47	0.04		4.83	3.66	0.1
Tang et al., 2015, Tectonophysics			The Erguna Massif	50.7797	50.7797	119.529	119.529				12ER8-2					140											71.67	0.36		14.42				1.82659	1.36	0.47	0.04		4.87	3.66	0.1
Tang et al., 2015, Tectonophysics			The Erguna Massif	50.7797	50.7797	119.529	119.529				12ER8-3					140											71.58	0.38		14.41				1.91657	1.37	0.48	0.04		4.86	3.64	0.11
Tang et al., 2015, Tectonophysics			The Erguna Massif	50.7797	50.7797	119.529	119.529				12ER8-4					140											71.47	0.38		14.4				1.92557	1.4	0.48	0.04		4.83	3.63	0.11
Tang et al., 2015, Tectonophysics			The Erguna Massif	52.2197	52.2197	121.559	121.559				12ER35-1					156											61.72	0.85		16.7				4.53499	4.24	2.87	0.05		3.19	4.64	0.22
Tang et al., 2015, Tectonophysics			The Erguna Massif	52.2197	52.2197	121.559	121.559				12ER35-3					156											61.76	0.88		16.6				4.41802	4	2.9	0.05		3.34	4.63	0.23
Tang et al., 2015, Tectonophysics			The Erguna Massif	52.2197	52.2197	121.559	121.559				12ER35-4					156											60.77	0.93		16.25				5.06587	4.3	3.25	0.06		3.34	4.39	0.24
Tang et al., 2015, Tectonophysics			The Erguna Massif	52.2197	52.2197	121.559	121.559				12ER35-5					156											61.19	0.9		16.14				5.09287	4.3	3.32	0.07		3.03	4.38	0.24
Tang et al., 2015, Tectonophysics			The Erguna Massif	52.1589	52.1589	121.501	121.501				13ER16-1					155											64.38	0.72		15.25				4.13908	3.72	2.54	0.06		3.82	4	0.2
Tang et al., 2015, Tectonophysics			The Erguna Massif	52.1589	52.1589	121.501	121.501				13ER16-3					155											63.79	0.76		15.32				4.39102	3.82	2.74	0.06		3.79	3.99	0.22
Tang et al., 2015, Tectonophysics			The Erguna Massif	52.1589	52.1589	121.501	121.501				13ER18-1					155											63.28	0.75		15.42				4.36403	3.81	2.65	0.06		3.88	4	0.22
Tang et al., 2015, Tectonophysics			The Erguna Massif	52.1589	52.1589	121.501	121.501				13ER18-2					155											64.86	0.7		15.13				3.95012	3.63	2.41	0.06		3.84	4.01	0.2
Tang et al., 2015, Tectonophysics			The Erguna Massif	52.1589	52.1589	121.501	121.501				13ER18-3					155											62.84	0.76		15.16				4.57998	4.1	2.84	0.07		3.77	4.02	0.24
Tang et al., 2015, Tectonophysics			The Erguna Massif	49.9436	49.9436	118.838	118.838				13ER48-1					150											73.75	0.23		13.89				1.24172	0.57	0.17	0.02		5.45	3.84	0.04
Tang et al., 2015, Tectonophysics			The Erguna Massif	49.9436	49.9436	118.838	118.838				13ER48-3					150											73.33	0.24		13.91				1.49367	0.63	0.19	0.02		5.31	3.9	0.05
Tang et al., 2015, Tectonophysics			The Erguna Massif	49.9436	49.9436	118.838	118.838				13ER48-4					150											73.54	0.21		13.87				1.38569	0.62	0.17	0.02		5.31	3.82	0.05
Tang et al., 2015, Tectonophysics			The Erguna Massif	49.9417	49.9417	118.832	118.832				12ER2-1					152											70.16	0.46		15.1				2.09653	1.04	0.45	0.04		5.63	4.11	0.1
Tang et al., 2015, Tectonophysics			The Erguna Massif	49.9417	49.9417	118.832	118.832				12ER2-2					152											70.86	0.47		14.38				2.17752	1.04	0.45	0.05		5.33	3.98	0.1
Tang et al., 2015, Tectonophysics			The Erguna Massif	49.9417	49.9417	118.832	118.832				12ER2-3					152											74.44	0.32		13.01				1.51166	0.43	0.17	0.02		6.62	2.75	0.03
Tang et al., 2015, Tectonophysics			The Erguna Massif	49.9417	49.9417	118.832	118.832				12ER2-4					152											74.52	0.32		12.89				1.41269	0.48	0.17	0.02		6.47	2.78	0.03
Tang et al., 2015, Tectonophysics			The Erguna Massif	49.9417	49.9417	118.832	118.832				12ER2-7					152											70.34	0.48		14.82				2.20451	1.14	0.48	0.05		5.33	4.15	0.12
Tang et al., 2015, Tectonophysics			The Erguna Massif	49.9417	49.9417	118.832	118.832				12ER2-8					152											67.87	0.62		15.74				2.64541	1.34	0.58	0.05		5.31	4.4	0.14
Tang et al., 2015, Tectonophysics			The Erguna Massif	49.9417	49.9417	118.832	118.832				12ER2-6					152											50.69	2.04		17.57				9.25894	6.49	4.13	0.17		2.42	4.23	0.66
Tang et al., 2015, Tectonophysics			The Erguna Massif	49.9417	49.9417	118.832	118.832				13ER2-9					152											55.51	1.71		17.35				7.10842	4.67	2.27	0.11		4.01	4.67	0.67
Gou et al., 2018, IGR			The Erguna Massif	50.6644	50.6644	120.267	120.267				14ER462-1					150											62.28	0.69		16.89				4.76894	2.82	0.65	0.03		2.63	4.66	0.25
Gou et al., 2018, IGR			The Erguna Massif	50.6644	50.6644	120.267	120.267				14ER462-2					150											62.68	0.68		16.7				4.61597	2.41	0.76	0.03		2.91	4.12	0.26
Gou et al., 2018, IGR			The Erguna Massif	50.7651	50.7651	120.165	120.165				14P2-1					150											59.32	0.82		15.76				4.99389	3.46	2.24	0.04		2.58	4.19	0.27
Gou et al., 2018, IGR			The Erguna Massif	50.7651	50.7651	120.165	120.165				14P2-3					150											57.2	0.86		15.86				4.80493	3.94	2.62	0.04		2.75	3.97	0.27
Gou et al., 2018, IGR			The Erguna Massif	50.7651	50.7651	120.165	120.165				14P2-5					150											58.93	0.81		15.1				5.06587	4.48	1.39	0.07		3.19	3.17	0.25
Gou et al., 2018, IGR			The Erguna Massif	52.25	52.25	121.542	121.542				1622-1					150											65.19	0.62		15.41				3.57221	3.44	2.12	0.07		3.62	4.32	0.17
Gou et al., 2018, IGR			The Erguna Massif	52.25	52.25	121.542	121.542				1623-2					150											61.68	0.87		15.79				4.79593	4.02	2.88	0.07		3.89	4.35	0.23
Gou et al., 2018, IGR			The Erguna Massif	52.25	52.25	121.542	121.542				1624-1					150											65.09	0.62		14.95				4.09409	3.54	2.25	0.06		3.57	3.94	0.2
Gou et al., 2018, IGR			The Erguna Massif	50.3611	50.3611	120.427	120.427				M183-2					130											64.74	0.62		16.15				4.31004	3.09	1.45	0.09		3.31	4.21	0.29
Gou et al., 2018, IGR			The Erguna Massif	50.3611	50.3611	120.427	120.427				M184-1					130											62.05	0.72		17.03				4.12108	3.51	1.23	0.07		4.24	4.07	0.29
Gou et al., 2018, IGR			The Erguna Massif	50.3611	50.3611	120.427	120.427				M209-1					130											61.86	0.88		15.68				6.48756	2.32	1.1	0.03		4.83	3.49	0.34
Gou et al., 2018, IGR			The Erguna Massif	50.3611	50.3611	120.427	120.427				M209-5					130											61.2	0.86		15.68				6.14563	3.6	1.51	0.05		3.68	4.02	0.33
Gou et al., 2018, IGR			The Erguna Massif	50.3611	50.3611	120.427	120.427				M209-8					130											60.04	0.93		16.73				5.64175	4.7	1.75	0.12		3.63	3.9	0.36
Gou et al., 2018, IGR		Manitu Formation	The Erguna Massif	50.3611	50.3611	120.427	120.427				M237-1					130											68.48	0.47		15.56				2.88836	1.51	0.51	0.07		5.09	4.13	0.14
Gou et al., 2018, IGR		Manitu Formation	The Erguna Massif	50.3611	50.3611	120.427	120.427				M237-4					130											66.09	0.52		15.94				3.04132	2.25	0.78	0.09		3.94	4.65	0.16
Gou et al., 2018, IGR		Manitu Formation	The Erguna Massif	50.3956	50.3956	120.68	120.68				15ER266					130											67.04	0.5		16.52				2.11453	1.9	0.6	0.03		5.23	4.1	0.16
Gou et al., 2018, IGR		Manitu Formation	The Erguna Massif	50.3956	50.3956	120.68	120.68				15ER267					130											67.97	0.47		15.62				2.85237	1.79	0.64	0.05		4.97	3.79	0.14
Gou et al., 2018, IGR		Manitu Formation	The Erguna Massif	50.7189	50.7189	119.795	119.795				15ER295					126											67.68	0.43		15.79				2.55543	1.68	0.6	0.06		5.1	4.09	0.11
Gou et al., 2018, IGR			The Erguna Massif	50.3611	50.3611	120.427	120.427				M248-1					130											69.69	0.25		14.87				1.92557	1.3	0.57	0.08		4.94	3.37	0.08
Gou et al., 2018, IGR			The Erguna Massif	50.3611	50.3611	120.427	120.427				M248-2					130											69.86	0.25		14.93				1.92557	1.3	0.57	0.08		4.95	3.34	0.08
Gou et al., 2018, IGR			The Erguna Massif	50.3558	50.3558	119.256	119.256				1695-1					130											62.07	0.63		16.78				3.69818	3.6	1.44	0.07		4.11	4.04	0.26
Gou et al., 2018, IGR			The Erguna Massif	50.3956	50.3956	120.68	120.68				14ES1-2					115											62.52	0.63		16.18				4.07609	3.34	1.75	0.09		4.42	4.14	0.26
Gou et al., 2018, IGR			The Erguna Massif	50.3956	50.3956	120.68	120.68				15ER591-2					126											68.56	0.41		15.21				2.31249	1.74	0.72	0.06		5.04	3.79	0.1
Gou et al., 2018, IGR			The Erguna Massif	50.3956	50.3956	120.68	120.68				15ER592-2					126											65.43	0.44		17.46				2.29449	2.89	0.76	0.07		4.56	4.37	0.11
Gou et al., 2018, IGR			The Erguna Massif	50.3956	50.3956	120.68	120.68				15ER593					126											62.98	0.69		16.46				4.36403	3.87	2.05	0.1		4.15	3.93	0.26
Gou et al., 2018, IGR			The Erguna Massif	50.7878	50.7878	120.763	120.763				1697-1					162											77.92	0.13		11.49				2.79838	0.1	0.42	0.23		3.47	0.23	0.03
Gou et al., 2018, IGR			The Erguna Massif	51.3828	51.3828	124.279	124.279				16X34-1					156											70.5	0.34		14.85				1.93457	1.17	0.61	0.06		4.2	4.61	0.11
Gou et al., 2018, IGR			The Erguna Massif	51.3828	51.3828	124.279	124.279				16X35-1					156											72.18	0.25		14.47				1.38569	1.21	0.44	0.04		4.14	4.55	0.08
Gou et al., 2018, IGR			The Erguna Massif	51.3828	51.3828	124.279	124.279				16X35-3					156											72.38	0.29		14.16				1.70062	1.2	0.52	0.06		3.73	4.73	0.09
Gou et al., 2018, IGR			The Erguna Massif	49.8414	49.8414	118.763	118.763				M568-1					152											75.06	0.11		13.47				0.94479	1.08	0.18	0.04		3.42	4.56	0.04
Gou et al., 2018, IGR			The Erguna Massif	50.3611	50.3611	120.427	120.427				M215-1					161											74.67	0.26		13.88				1.07076	0.1	0.11	0.03		4.63	4.12	0.06
Gou et al., 2018, IGR			The Erguna Massif	50.3611	50.3611	120.427	120.427				M215-3					161											72.49	0.27		15.12				1.08876	0.38	0.1	0.05		4.28	5.17	0.07
Gou et al., 2018, IGR			The Erguna Massif	50.3558	50.3558	119.256	119.256				1702-1					134											71.85	0.39		14.17				1.94357	1.29	0.51	0.05		5.17	3.72	0.1
Gou et al., 2018, IGR			The Erguna Massif	50.3558	50.3558	119.256	119.256				1702-2					134											71.99	0.38		14.12				1.92557	1.28	0.49	0.05		5.14	3.74	0.1
Gou et al., 2018, IGR			The Erguna Massif	50.3558	50.3558	119.256	119.256				1702-3					134											71.17	0.46		14.39				2.19551	1.3	0.54	0.06		5.36	3.84	0.12
Gou et al., 2018, IGR			The Erguna Massif	49.9378	49.9378	118.829	118.829				M560-1					128											76.08	0.26		12.64				1.23273	0.5	0.18	0.05		5.47	3.18	0.04
Gou et al., 2018, IGR			The Erguna Massif	50.7806	50.7806	119.529	119.529				15ER576					128											71.51	0.36		14.45				1.93457	1.46	0.48	0.05		4.97	3.8	0.1
Gou et al., 2018, IGR			The Erguna Massif	50.7806	50.7806	119.529	119.529				14ER491					130											74.56	0.14		13.15				1.8086	0.23	0.16	0.03		3.66	4.61	0.03
Gou et al., 2018, IGR			The Erguna Massif	50.3611	50.3611	120.427	120.427				15ER178					130											75.58	0.09		12.72				1.13375	0.2	0.16	0.03		5.68	2.72	0.02
Gou et al., 2018, IGR			The Erguna Massif	50.3611	50.3611	120.427	120.427				15ER181					130											73.3	0.13		13.86				1.40369	0.42	0.18	0.07		5.04	3.79	0.03
Gou et al., 2018, IGR			The Erguna Massif	50.3611	50.3611	120.427	120.427				15ER204					130											75.11	0.12		12.89				1.43968	0.33	0.13	0.04		4.15	4.08	0.02
Gou et al., 2018, IGR			The Erguna Massif	50.7806	50.7806	119.529	119.529				15ER539-3					130											77.58	0.02		12.33				0.611864	0.23	0.03	0.01		3.93	4.06	0.01
Gou et al., 2018, IGR			The Erguna Massif	50.3611	50.3611	120.427	120.427				M171-8					130											76.15	0.07		12.54				0.26994	0.37	0.25	0.01		5.95	2.25	0.03
Gou et al., 2018, IGR			The Erguna Massif	50.3611	50.3611	120.427	120.427				M190-1					130											76.53	0.1		13.42				0.422906	0.07	0.13	0.01		5.07	2.8	0.02
Gou et al., 2018, IGR			The Erguna Massif	50.3611	50.3611	120.427	120.427				M190-2					130											76.75	0.09		13.51				0.422906	0.07	0.13	0.01		5.08	2.82	0.03
Gou et al., 2018, IGR			The Erguna Massif	51.2922	51.2922	121.439	121.439				M265-1					139											75.38	0.12		13.13				0.926794	0.26	0.22	0.03		5.44	3.54	0.02
Gou et al., 2018, IGR			The Erguna Massif	50.6944	50.6944	119.59	119.59				15ER583					115											74.69	0.1		13.68				1.31371	0.3	0.07	0.04		5.08	4.13	0.01
Gou et al., 2018, IGR			The Erguna Massif	50.3558	50.3558	119.256	119.256				1771-1					130											76.53	0.07		12.57				0.476894	0.46	0.13	0.05		4.66	3.37	0.02
Li et al., 2022, Minerals			The Erguna Massif	49.7	49.7	119.367	119.367				RZT1					132											70.59	0.64		14.45		7.07	0.88	7.24159	1.13	0.76	0.26		2.37	3.24	0.13
Li et al., 2022, Minerals			The Erguna Massif	49.7	49.7	119.367	119.367				RZT2					135											71.01	0.52		13.92		5.72	0.59	5.73686	1.35	0.91	0.09		2.86	3.8	0.12
Li et al., 2022, Minerals			The Erguna Massif	49.7	49.7	119.367	119.367				Rz9676					140											77.62	0.23		11.29		1.71	0.53	2.06866	0.81	0.21	0.08		2.69	2.82	0.06
Li et al., 2022, Minerals			The Erguna Massif	49.7	49.7	119.367	119.367				14101					132											77.41	0.16		10.64		3.43	0.65	3.73631	0.44	0.2	0.05		3.39	2.8	0.09
Li et al., 2022, Minerals			The Erguna Massif	49.7	49.7	119.367	119.367				20210					132											72.91	0.39		12.39		2.36	0.51	2.63353	1.36	0.47	0.16		2.8	2.36	0.33
Li et al., 2022, Minerals			The Erguna Massif	49.7	49.7	119.367	119.367				T1001					132											71.17	0.32		14.58		3.11	0.57	3.36838	1.03	0.78	0.07		2.35	3.66	0.1
Li et al., 2022, Minerals			The Erguna Massif	49.7	49.7	119.367	119.367				D20					132											70.23	0.35		16.26		3.74	0.57	3.93525	1.31	0.94	0.05		2.52	3.13	0.15
Li et al., 2022, Minerals			The Erguna Massif	49.7	49.7	119.367	119.367				Rz4897					137											74.33	0.2		11.74		3.62	0.57	3.82728	0.54	0.28	0.03		7.02	0.63	0.092
Li et al., 2022, Minerals			The Erguna Massif	49.7	49.7	119.367	119.367				Rz4714					132											61.68	0.65		16.74		5.84	1.08	6.33483	4.63	1.66	0.1		1.4	4.25	0.188
Li et al., 2022, Minerals			The Erguna Massif	49.7	49.7	119.367	119.367				Rz4773					125											61.84	0.68		16.94		5.48	2.01	6.9409	4.36	1.57	0.08		2.17	3.9	0.246
Li et al., 2022, Minerals			The Erguna Massif	49.7	49.7	119.367	119.367				1210					132											70.65	0.37		14.62		3.2	1.44	4.31936	1.09	0.78	0.07		3.6	3.83	0.104
Li et al., 2022, Minerals			The Erguna Massif	49.7	49.7	119.367	119.367				6959					132											73.78	0.3		13.81		1.3	0.05	1.21974	0.29	0.15	0.03		4.91	4.42	0.05
Li et al., 2022, Minerals			The Erguna Massif	49.7	49.7	119.367	119.367				6960					132											72.7	0.29		14.4		0.85	0.17	0.93483	0.49	0.27	0.03		4.97	4.32	0.04
Sun et al., 2013, IGR			The Erguna Massif	48.4667	48.4667	117.25	117.25				M261-1					179											75.64	0.14		13.62		0.16	0.32	0.463968	0.07	0.11	0.01		5.73	2.39	0.03
Sun et al., 2013, IGR			The Erguna Massif	48.4667	48.4667	117.25	117.25				M261-2					179											76.42	0.14		13.28		0.22	0.43	0.627956	0.01	0.13	0.01		5.52	0.22	0.03
Sun et al., 2013, IGR			The Erguna Massif	48.4667	48.4667	117.25	117.25				M421					179											68.78	0.25		13.69		0.52	1.04	1.5079	1.92	0.36	0.08		2.76	3.53	0.06
Sun et al., 2013, IGR			The Erguna Massif	48.4667	48.4667	117.25	117.25				M548-3					179											70.06	0.5		14.88		0.88	1.76	2.55182	0.97	0.6	0.05		4.57	4.88	0.12
Sun et al., 2013, IGR			The Erguna Massif	48.4667	48.4667	117.25	117.25				M548-4					179											50.84	1.34		16.84		2.98	5.97	8.6514	6.3	3.62	0.16		1.05	5.31	0.42
Sun et al., 2013, IGR			The Erguna Massif	48.4667	48.4667	117.25	117.25				M548-6					179											50.95	1.33		16.84		3	5.99	8.6894	6.33	3.65	0.16		1.05	5.33	0.41
Sun et al., 2013, IGR			The Erguna Massif	48.4667	48.4667	117.25	117.25				M244-1					154											76.86	0.04		12.73		0.31	0.61	0.888938	0.29	0.01	0.01		4.27	3.95	0.01
Sun et al., 2013, IGR			The Erguna Massif	48.4667	48.4667	117.25	117.25				M099-3					154											71.68	0.3		14.24		0.57	1.14	1.65289	1.2	0.4	0.06		5	4.22	0.07
Sun et al., 2013, IGR			The Erguna Massif	48.4667	48.4667	117.25	117.25				M009-1					154											77.75	0.09		12.64		0.16	0.32	0.463968	0.31	0.09	0.01		5.03	3.44	0.03
Sun et al., 2013, IGR			The Erguna Massif	48.4667	48.4667	117.25	117.25				M011-2					154											76.82	0.09		12.49		0.36	0.71	1.03393	0.26	0.09	0.04		4.72	3.8	0.02
Wu, 2008, PHD's Dissertation			The Erguna Massif	52.7	52.7	122.5	122.5				ML-1					121											72.8	0.28		13.57		0.86	1.73	2.50383	1.26	0.39	0.04		5.29	3.13	0.08
Wu, 2008, PHD's Dissertation			The Erguna Massif	52.7	52.7	122.5	122.5				ML-2					121											74.06	0.22		13.06		0.87	1.56	2.34283	0.93	0.29	0.03		5.11	3.03	0.06
Wu, 2008, PHD's Dissertation			The Erguna Massif	52.7	52.7	122.5	122.5				ML-3					121											71.53	0.3		13.85		1.26	1.68	2.81375	1.28	0.44	0.04		5.26	3.1	0.09
Wu, 2008, PHD's Dissertation			The Erguna Massif	52.7	52.7	122.5	122.5				ML-4					121											70.43	0.31		13.99		0.84	2.49	3.24583	1.65	0.8	0.05		5.33	3.01	0.12
Wu, 2008, PHD's Dissertation			The Erguna Massif	52.7	52.7	122.5	122.5				ML-5					121											72.19	0.26		13.84		0.96	1.8	2.66381	1.09	0.33	0.04		5.29	3.12	0.08
Wu, 2008, PHD's Dissertation			The Erguna Massif	52.7	52.7	122.5	122.5				ML-31					121											72.49	0.2		14.43		0.26	2.19	2.42395	1.84	0.58	0.04		3.7	3.82	0.1
Wu, 2008, PHD's Dissertation			The Erguna Massif	52.7	52.7	122.5	122.5				ML-32					121											72.2	0.25		14.67		0.71	1.92	2.55886	1.46	0.59	0.05		3.84	3.48	0.13
Wu, 2008, PHD's Dissertation			The Erguna Massif	52.7	52.7	122.5	122.5				ML-33					121											72.27	0.25		14.59		0.27	2.02	2.26295	1.88	0.56	0.04		3.31	3.84	0.12
Wu, 2008, PHD's Dissertation			The Erguna Massif	52.7	52.7	122.5	122.5				HP5					121											74.62	0.15		13.27		0.54	1.08	1.56589	0.3	0.33	0.02		5.04	3.96	0.01
Ying et al., 2010, Int J Earth Sci		Manzhouli	The Erguna Massif	48.5	48.5	116	116				05MZL01	Basaltic Andesite				164.2											61.4	1.33		15.5				4.75994	3.27	0.91	0.13		3.81	4.98	0.66
Ying et al., 2010, Int J Earth Sci		Manzhouli	The Erguna Massif	48.5	48.5	116	116				05MZL02	Basaltic Andesite				165.2											61.5	1.32		15.4				4.91291	3.24	0.94	0.07		3.87	4.48	0.68
Ying et al., 2010, Int J Earth Sci		Manzhouli	The Erguna Massif	48.5	48.5	116	116				05MZL06	Basaltic Andesite				166.2											59.6	0.99		16.4				4.75994	4.81	2.57	0.07		2.72	4.77	0.34
Ying et al., 2010, Int J Earth Sci		Manzhouli	The Erguna Massif	48.5	48.5	116	116				05MZL08	Basaltic Andesite				167.2											56.7	1.62		15.7				6.82948	5.59	3.8	0.12		2.84	4.52	0.56
Ying et al., 2010, Int J Earth Sci		Manzhouli	The Erguna Massif	48.5	48.5	116	116				05MZL09	Basaltic Andesite				164.2											56.2	1.7		15.8				7.55832	5.77	3.21	0.09		2.85	3.73	0.61
Ying et al., 2010, Int J Earth Sci		Manzhouli	The Erguna Massif	48.5	48.5	116	116				05MZL11	Basaltic Andesite				149.5											57	1.65		15.8				7.04543	5.64	3.71	0.1		2.78	4.17	0.58
Ying et al., 2010, Int J Earth Sci		Manzhouli	The Erguna Massif	48.5	48.5	116	116				05MZL13	Rhyolite				149.5											79.9	0.1		10.2				0.908798	0.26	0.04	0.01		4.13	1.61	0.06
Ying et al., 2010, Int J Earth Sci		Manzhouli	The Erguna Massif	48.5	48.5	116	116				05MZL14	Rhyolite				149.5											80.5	0.1		9.61				0.755832	0.23	0.04	0.01		3.93	1.59	0.03
Ying et al., 2010, Int J Earth Sci		Manzhouli	The Erguna Massif	48.5	48.5	116	116				05MZL19	Basaltic Andesite				149.5											61	1.52		16				4.21106	4.32	0.57	0.04		2.96	4.45	0.8
Ying et al., 2010, Int J Earth Sci		Manzhouli	The Erguna Massif	48.5	48.5	116	116				05MZL20	Basaltic Andesite				149.5											59.9	1.57		16.4				4.517	4.42	0.76	0.02		3.06	4.55	0.82
Ying et al., 2010, Int J Earth Sci		Manzhouli	The Erguna Massif	48.5	48.5	116	116				05MZL22	Basaltic Andesite				149.5											57	1.52		16.6				6.08265	4.47	0.94	0.03		3.16	3.86	0.8
Ying et al., 2010, Int J Earth Sci		Tahe	The Erguna Massif	51	51	123.5	123.5				05TH03					129.7											66.8	0.51		16.5				2.14152	1.64	0.42	0.09		4.61	6.53	0.07
Ying et al., 2010, Int J Earth Sci		Tahe	The Erguna Massif	51	51	123.5	123.5				05TH05					129.7											53.6	1.08		18.6				7.40535	5.48	3.57	0.14		3.14	3.3	0.32
Ying et al., 2010, Int J Earth Sci		Tahe	The Erguna Massif	51	51	123.5	123.5				05TH12					129.7											58	0.99		16.3				5.19185	4.18	2.7	0.08		3.37	4.23	0.37
Ying et al., 2010, Int J Earth Sci		Tahe	The Erguna Massif	51	51	123.5	123.5				05TH14					129.7											58	1		16.3				5.20984	4.2	2.67	0.08		3.44	4.16	0.37
Ying et al., 2010, Int J Earth Sci		Tahe	The Erguna Massif	51	51	123.5	123.5				05TH16					129.7											56.7	1.17		16.7				6.10064	6.03	3.57	0.11		3	3.35	0.42
Ying et al., 2010, Int J Earth Sci		Tahe	The Erguna Massif	51	51	123.5	123.5				05TH17					129.7											56.6	1.08		16.4				6.55954	6.38	3.89	0.14		2.35	2.91	0.38
Ying et al., 2010, Int J Earth Sci		Tahe	The Erguna Massif	51	51	123.5	123.5				05TH21					129.7											52.9	1.1		16.2				7.06343	7.19	5.15	0.11		1.88	4.35	0.29
Ying et al., 2010, Int J Earth Sci		Tahe	The Erguna Massif	51	51	123.5	123.5				05TH23					129.7											54.6	1.04		17.8				8.24217	7.08	4.4	0.14		1.72	2.74	0.34
Ying et al., 2010, Int J Earth Sci		Tahe	The Erguna Massif	51	51	123.5	123.5				05TH25					129.7											52.6	1.49		16.3				7.6483	7.68	3.22	0.12		2.05	3.12	0.59
Ying et al., 2010, Int J Earth Sci		Genhe	The Erguna Massif	48.5	48.5	119.6	119.6				05GH11					123.8											71.7	0.31		14.5				1.44868	0.57	0.24	0.05		5.62	4.82	0.04
Ying et al., 2010, Int J Earth Sci		Genhe	The Erguna Massif	48.5	48.5	119.6	119.6				05GH13					123.8											76.9	0.17		12.6				0.35992	0.15	0.02	0.01		6.65	2.47	0.01
Ying et al., 2010, Int J Earth Sci		Genhe	The Erguna Massif	48.5	48.5	119.6	119.6				05GH14					123.8											76.4	0.16		12.4				0.341924	0.15	0.01	0.01		6.26	2.81	0.01
Ying et al., 2010, Int J Earth Sci		Genhe	The Erguna Massif	48.5	48.5	119.6	119.6				GH04-1					121.2											49.8	1.68		17.4				7.98123	7.94	5.27	0.16		2.23	3.54	0.56
Ying et al., 2010, Int J Earth Sci		Genhe	The Erguna Massif	48.5	48.5	119.6	119.6				GH04-2					121.2											58.4	1.31		17.2				6.10964	3.84	1.46	0.05		2.61	4.38	0.54
Ying et al., 2010, Int J Earth Sci		Genhe	The Erguna Massif	48.5	48.5	119.6	119.6				GH04-3					121.2											54.5	1.16		16.1				7.68429	4.37	2.49	0.08		3.19	3.05	0.38
Ying et al., 2010, Int J Earth Sci		Genhe	The Erguna Massif	48.5	48.5	119.6	119.6				GH04-4					114.5											53.9	1.3		17.6				7.09042	3.9	4.54	0.17		3.46	5.01	0.38
Ying et al., 2010, Int J Earth Sci			The Erguna Massif	48.5	48.5	119.6	119.6				ERBY04-1					140											52.5	1.33		16				6.88347	6.36	3.34	0.11		3.01	3.81	0.63
Ying et al., 2010, Int J Earth Sci			The Erguna Massif	48.5	48.5	119.6	119.6				ERBY04-2					140											55.6	1.32		16.2				6.7665	4.68	4.21	0.12		3.08	3.84	0.64
Ying et al., 2010, Int J Earth Sci			The Erguna Massif	48.5	48.5	119.6	119.6				ERBY04-3					141											55.2	1.3		16.1				7.08143	5.16	3.31	0.12		3.58	3.43	0.62
Ying et al., 2010, Int J Earth Sci			The Erguna Massif	48.5	48.5	119.6	119.6				ERBY04-4					142											55.8	1.27		15.9				6.92846	4.74	3.02	0.09		3.79	3.62	0.58
Ji et al., 2019, Tectonics		Hailar Basin	The Erguna Massif	48.116	48.116	116.773	116.773				BeiD5-2	Trachydacite				166											62.69	1.27		16.68				5.23684	1.78	1	0.03		4.18	4.47	0.17
Ji et al., 2019, Tectonics		Hailar Basin	The Erguna Massif	48.116	48.116	116.773	116.773				BeiD5-3	Trachydacite				166											62.39	1.27		16.64				5.20984	1.76	1	0.03		4.2	4.44	0.17
Ji et al., 2019, Tectonics		Hailar Basin	The Erguna Massif	48.116	48.116	116.773	116.773				BeiD5-4	Trachydacite				166											62.65	1.28		16.62				5.22784	1.77	1.01	0.03		4.19	4.42	0.17
Ji et al., 2019, Tectonics		Hailar Basin	The Erguna Massif	48.116	48.116	116.773	116.773				BeiD5-5	Trachydacite				166											62.21	1.26		16.72				5.20084	1.77	0.97	0.03		4.13	4.39	0.17
Ji et al., 2019, Tectonics		Hailar Basin	The Erguna Massif	48.116	48.116	116.773	116.773				BeiD5-6	Trachydacite				166											62.48	1.27		16.58				5.21884	1.77	1	0.03		4.19	4.42	0.17
Ji et al., 2019, Tectonics		Hailar Basin	The Erguna Massif	48.4158	48.4158	116.96	116.96				GW060	Trachyandesite				165											58.57	1.03		15.19				5.16485	4.46	1.59	0.13		3.26	4.78	0.44
Ji et al., 2019, Tectonics		Hailar Basin	The Erguna Massif	48.2143	48.2143	117.084	117.084				Bei53-1-1	Trachydacite				163											64.94	1.56		14.77				4.12108	2.11	0.77	0.13		0.36	8.49	0.22
Ji et al., 2019, Tectonics		Hailar Basin	The Erguna Massif	48.2143	48.2143	117.084	117.084				Bei53-1-2	Trachydacite				163											62.89	1.69		15.85				4.517	2.24	0.83	0.14		0.39	9.12	0.23
Ji et al., 2019, Tectonics		Hailar Basin	The Erguna Massif	48.2143	48.2143	117.084	117.084				Bei53-1-3	Trachyandesite				163											60.7	1.74		17.91				4.79593	2.18	0.88	0.16		0.37	9.39	0.25
Ji et al., 2019, Tectonics		Hailar Basin	The Erguna Massif	48.2143	48.2143	117.084	117.084				Bei53-1-4	Trachyandesite				163											60.36	1.73		17.91				4.76894	2.17	0.86	0.16		0.37	9.44	0.25
Ji et al., 2019, Tectonics		Hailar Basin	The Erguna Massif	48.2143	48.2143	117.084	117.084				Bei53-1-5	Trachyandesite				163											60.66	1.74		17.91				4.79593	2.19	0.88	0.16		0.37	9.45	0.25
Ji et al., 2019, Tectonics		Hailar Basin	The Erguna Massif	48.2143	48.2143	117.084	117.084				Bei53-1-6	Trachyandesite				163											60.9	1.82		17.08				4.85892	2.58	0.64	0.12		0.22	9.18	0.35
Ji et al., 2019, Tectonics		Hailar Basin	The Erguna Massif	48.2143	48.2143	117.084	117.084				bei53-2	Trachydacite				163											64.19	1.71		14.67				4.45401	2.66	0.58	0.1		0.23	8.61	0.32
Sun et al., 2011, Acta Petrol. Sin		Hailar Basin	The Erguna Massif	48.9167	48.9167	116.383	116.383				M036-1	Trachyandensite				158											67.36	0.95		16.34				2.6904	1.49	0.2	0.05		5.03	4.36	0.29
Sun et al., 2011, Acta Petrol. Sin		Hailar Basin	The Erguna Massif	48.9167	48.9167	116.383	116.383				M036-2	Trachyandensite				158											67.08	0.85		15.85				3.47323	1.51	0.23	0.07		4.84	4.43	0.24
Sun et al., 2011, Acta Petrol. Sin		Hailar Basin	The Erguna Massif	49.1333	49.1333	116.867	116.867				M048-1	Trachyandensite				157											63.41	0.93		17.52				3.81515	2.09	0.34	0.02		4.67	4.45	0.29
Sun et al., 2011, Acta Petrol. Sin		Hailar Basin	The Erguna Massif	49.1333	49.1333	116.867	116.867				M075-1	Trachyandensite				157											68.93	0.62		14.93				2.53744	0.64	0.31	0.04		5.94	4.51	0.09
Sun et al., 2011, Acta Petrol. Sin		Hailar Basin	The Erguna Massif	49.1333	49.1333	116.867	116.867				M080-1	Rhyolite				156											70.35	0.59		14.34				2.07854	0.61	0.26	0.03		5.72	4.46	0.13
Deng et al., 2019, OGR			The Erguna Massif	51.6708	51.6708	124.4	124.4				XLG-2	Granodiorite porphyry				149.7											64.66	0.58		16.64				3.56321	3.16	1.22	0.11		2.96	5.14	0.23
Deng et al., 2019, OGR			The Erguna Massif	51.6708	51.6708	124.4	124.4				XLG-4	Granodiorite porphyry				149.7											65.74	0.33		17.29				2.48345	3.09	0.78	0.08		2.83	5.52	0.19
Deng et al., 2019, OGR			The Erguna Massif	51.6708	51.6708	124.4	124.4				XLG-5	Granodiorite porphyry				149.7											65.84	0.53		16.1				2.74439	2.81	1.02	0.06		2.88	5.01	0.2
Deng et al., 2019, OGR			The Erguna Massif	51.6708	51.6708	124.4	124.4				XLG-6	Granodiorite porphyry				149.7											65.9	0.52		16.24				2.6904	2.91	1.08	0.06		3.07	5.13	0.2
Deng et al., 2019, OGR			The Erguna Massif	51.6708	51.6708	124.4	124.4				XLG-7	Granodiorite porphyry				149.7											65.68	0.59		16.1				2.96934	2.97	1.16	0.05		3.26	4.95	0.22
Deng et al., 2019, OGR			The Erguna Massif	51.6708	51.6708	124.4	124.4				XLG-8	Granodiorite porphyry				149.7											66.8	0.54		15.47				2.60942	2.94	1.17	0.06		3.26	4.66	0.2
Deng et al., 2019, OGR			The Erguna Massif	51.6708	51.6708	124.4	124.4				XLG-34	Granodiorite porphyry				149.7											64.7	0.6		16.63				3.68018	3.22	1.28	0.11		2.86	5	0.24
Deng et al., 2019, OGR			The Erguna Massif	51.6708	51.6708	124.4	124.4				XLG-39	Granodiorite porphyry				149.7											64.14	0.69		17.24				3.27527	3.02	1.15	0.06		2.78	5.3	0.3
Deng et al., 2019, OGR			The Erguna Massif	51.6708	51.6708	124.4	124.4				XLG-40	Granodiorite porphyry				149.7											63.42	0.7		16.81				4.43601	2.36	1.26	0.09		2.8	5.17	0.29
Deng et al., 2019, OGR			The Erguna Massif	51.6708	51.6708	124.4	124.4				XLG-30	Granodiorite porphyry				149.7											65.09	0.62		16.26				3.6082	3.27	1.46	0.09		2.91	4.93	0.22
Deng et al., 2019, OGR			The Erguna Massif	51.6708	51.6708	124.4	124.4				XLG-31	Granodiorite porphyry				149.7											64.51	0.68		16.33				3.77016	3.55	1.72	0.09		3.01	4.89	0.26
Deng et al., 2019, OGR			The Erguna Massif	51.6708	51.6708	124.4	124.4				XLG-32	Granodiorite porphyry				149.7											65.47	0.62		15.96				3.55421	3.27	1.57	0.09		3.09	4.76	0.22
Deng et al., 2019, OGR			The Erguna Massif	51.6708	51.6708	124.4	124.4				XLG-16	Rhyolite				152.3											69.79	0.55		18.84				1.26872	0.01	0.51	0.03		5.81	0.2	0.03
Deng et al., 2019, OGR			The Erguna Massif	51.6708	51.6708	124.4	124.4				XLG-17	Rhyolite				152.3											84.41	0.12		8.78				1.22373	0.01	0.3	0.05		2.79	0.07	0
Deng et al., 2019, OGR			The Erguna Massif	51.6708	51.6708	124.4	124.4				XLG-18	Rhyolite				152.3											85.36	0.27		8.78				0.998778	0.02	0.27	0.04		2.68	0.11	0.01
Deng et al., 2019, OGR			The Erguna Massif	51.6708	51.6708	124.4	124.4				XLG-19	Rhyolite				152.3											84.29	0.42		8.01				1.96156	0.02	0.29	0.04		2.46	0.09	0.02
Deng et al., 2019, OGR			The Erguna Massif	51.6708	51.6708	124.4	124.4				XLG-20	Rhyolite				152.3											84.72	0.35		7.98				1.75461	0.02	0.28	0.05		2.51	0.11	0.02
Deng et al., 2019, OGR			The Erguna Massif	51.6708	51.6708	124.4	124.4				XLG-12	Diorite porphyry				147.7											51.86	0.98		17.18				8.44912	8.3	5.59	0.15		1.1	3.11	0.31
Deng et al., 2019, OGR			The Erguna Massif	51.6708	51.6708	124.4	124.4				XLG-13	Diorite porphyry				147.7											55.65	0.84		17.18				6.64952	6.1	3.68	0.14		2.81	3.82	0.33
Deng et al., 2019, OGR			The Erguna Massif	51.6708	51.6708	124.4	124.4				XLG-14	Diorite porphyry				147.7											53.16	0.93		17.17				7.33337	6.97	4.41	0.15		2.24	3.67	0.35
Deng et al., 2019, OGR			The Erguna Massif	51.6708	51.6708	124.4	124.4				XLG-35	Diorite porphyry				147.7											54.99	0.93		17.54				7.08143	6.69	3.57	0.14		2.11	3.54	0.3
Deng et al., 2019, OGR			The Erguna Massif	51.6708	51.6708	124.4	124.4				XLG-36	Diorite porphyry				147.7											53.77	0.95		16.87				7.49533	6.37	4.67	0.16		2.22	3.71	0.36
Deng et al., 2019, OGR			The Erguna Massif	51.6708	51.6708	124.4	124.4				XLG-37	Diorite porphyry				147.7											55.2	0.89		17.24				7.07243	6.64	4.2	0.17		2.01	3.43	0.34
Deng et al., 2019, OGR			The Erguna Massif	51.6708	51.6708	124.4	124.4				XLG-9	Granite porphyry				122.8											68.82	0.35		15				2.6904	1.1	0.39	0.1		5.12	3.77	0.06
Deng et al., 2019, OGR			The Erguna Massif	51.6708	51.6708	124.4	124.4				XLG-10	Granite porphyry				122.8											69.07	0.32		14.92				2.60042	1.11	0.26	0.08		5.19	3.84	0.05
Deng et al., 2019, OGR			The Erguna Massif	51.6708	51.6708	124.4	124.4				XLG-11	Granite porphyry				122.8											68.21	0.35		15.04				2.6814	1.26	0.39	0.1		5.1	3.94	0.06
Gou J. 2010, Acta Petrologica Sinica		Manzhouli	The Erguna Massif	48.6204	48.6204	116.817	116.817				M040-2	Rhyolite				141											78.56	0.11		11.03				0.746834	0.54	0.16	0.03		4.09	3.2	0.05
Gou J. 2010, Acta Petrologica Sinica		Manzhouli	The Erguna Massif	48.6204	48.6204	116.817	116.817				M054-3	Rhyolite				141											77.83	0.08		11.82				0.431904	0.33	0.06	0.01		4.69	3.69	0.02
Gou J. 2010, Acta Petrologica Sinica		Manzhouli	The Erguna Massif	48.6204	48.6204	116.817	116.817				M054-4	Rhyolite				141											77.53	0.07		12.24				0.341924	0.33	0.05	0.02		4.8	3.83	0.02
Gou J. 2010, Acta Petrologica Sinica		Manzhouli	The Erguna Massif	48.6204	48.6204	116.817	116.817				M054-7	Rhyolite				141											79.15	0.07		11.09				0.566874	0.33	0.07	0.01		4.43	3.34	0.02
Gou J. 2010, Acta Petrologica Sinica		Manzhouli	The Erguna Massif	49.3302	49.3302	117.496	117.496				M103-1	Rhyolite				139											82.11	0.06		9.23				0.188958	0.31	0.05	0.01		3.72	2.7	0.02
Gou J. 2010, Acta Petrologica Sinica		Manzhouli	The Erguna Massif	49.3302	49.3302	117.496	117.496				M103-2	Rhyolite				139											77.75	0.11		11.75				0.386914	0.46	0.14	0.02		4.71	3.45	0.02
Gou J. 2010, Acta Petrologica Sinica		Manzhouli	The Erguna Massif	49.3302	49.3302	117.496	117.496				M122-2	Rhyolite				139											76.29	0.25		11.97				1.22373	0.19	0.17	0.03		4.86	3.56	0.03
Gou J. 2010, Acta Petrologica Sinica		Manzhouli	The Erguna Massif	49.543	49.543	116.745	116.745				M132-1	Rhyolite				141											73.78	0.1		13.77				1.17874	0.35	0.21	0.01		5.01	3.54	0.02
Gou J. 2010, Acta Petrologica Sinica		Manzhouli	The Erguna Massif	49.543	49.543	116.745	116.745				M132-4	Rhyolite				141											73.55	0.1		13.48				1.70062	0.48	0.25	0.01		5.03	3.28	0.02
Gou J. 2010, Acta Petrologica Sinica		Manzhouli	The Erguna Massif	49.5022	49.5022	117.191	117.191				M138-1	Rhyolite				141											75.74	0.25		12.5				0.872806	0.11	0.11	0.02		5.26	3.99	0.02
Xu et al., 2011, Geological Bulletin of China			The Erguna Massif	49.9991	49.9991	120.114	120.114				ER1-1					128											56.22	1.029		16.56				6.93746	6.156	2.98	0.144		2.884	4.878	0.3686
Xu et al., 2011, Geological Bulletin of China			The Erguna Massif	49.9991	49.9991	120.114	120.114				ER1-4					128											55.99	1.031		16.64				7.26139	6.026	2.75	0.1378		2.735	3.28	0.369
Xu et al., 2011, Geological Bulletin of China			The Erguna Massif	50.3326	50.3326	120.25	120.25				ER3-3					125											55.33	1.137		16.46				6.83848	5.655	3.78	0.1076		2.628	3.125	0.3701
Xu et al., 2011, Geological Bulletin of China			The Erguna Massif	50.4337	50.4337	120.015	120.015				ER5-1					114											58.37	2.093		15.25				7.08143	4.109	1.63	0.0671		2.828	3.234	1.1168
Xu et al., 2011, Geological Bulletin of China			The Erguna Massif	50.4337	50.4337	120.015	120.015				ER5-2					114											57.97	2.106		15.31				6.81149	4.048	1.33	0.0619		2.935	3.422	1.1307
Tang et al., 2022, Lithos			The Erguna Massif	50.7103	50.7103	120.214	120.214				16ER13-2					127											56.19	1.2		17.51				5.63275	5.98	2.88	0.048		1.9	4.01	0.3
Tang et al., 2022, Lithos			The Erguna Massif	50.7103	50.7103	120.214	120.214				16ER13-3					127											57.76	1.16		17.22				5.36281	5.79	2.77	0.047		1.9	4.38	0.18
Tang et al., 2022, Lithos			The Erguna Massif	50.7103	50.7103	120.214	120.214				16ER13-4					127											57.88	1.15		17.78				5.07487	3.3	1.43	0.044		2.67	4.52	0.21
Tang et al., 2022, Lithos			The Erguna Massif	50.7103	50.7103	120.214	120.214				16ER13-7					127											57.98	1.13		17.38				5.07487	4.36	2.28	0.031		2.4	4.58	0.24
Tang et al., 2022, Lithos			The Erguna Massif	50.1611	50.1611	120.199	120.199				12ER21-2					119											57.64	1.06		16.41				5.24583	3.91	2.94	0.077		3.74	3.99	0.43
Tang et al., 2022, Lithos			The Erguna Massif	50.1611	50.1611	120.199	120.199				12ER21-3					119											59.04	1.08		16.23				5.29982	3.51	2.8	0.077		3.6	4.18	0.44
Tang et al., 2022, Lithos			The Erguna Massif	50.1611	50.1611	120.199	120.199				12ER21-4					119											59.31	1.07		16.43				5.16485	3.85	2.79	0.081		3.61	3.79	0.44
Tang et al., 2022, Lithos			The Erguna Massif	50.1611	50.1611	120.199	120.199				12ER21-5					119											56.96	1.38		17.1				5.8397	4.54	2.98	0.082		3.51	3.85	0.59
Tang et al., 2022, Lithos			The Erguna Massif	50.1611	50.1611	120.199	120.199				12ER21-6					119											55.97	1.37		16.5				5.87569	3.9	2.75	0.074		3.09	5.71	0.6
Tang et al., 2022, Lithos			The Erguna Massif	48.0028	48.0028	122.77	122.77				17DX14-1					122											55.031	1.152		18.091				7.34417	6.041	3.435	0.133		1.122	4.66	0.315
Tang et al., 2022, Lithos			The Erguna Massif	48.0028	48.0028	122.77	122.77				17DX14-2					122											57.045	1.045		19.267				5.71913	6.188	1.91	0.115		2.116	4.709	0.368
Tang et al., 2022, Lithos			The Erguna Massif	48.0028	48.0028	122.77	122.77				17DX14-3					122											56.208	1.057		19.218				5.91529	6.756	2.061	0.115		2.046	4.136	0.339
Tang et al., 2022, Lithos			The Erguna Massif	48.2753	48.2753	123.637	123.637				17DX15-1					123											59.576	0.768		19.005				4.25695	5.732	1.433	0.095		1.738	4.474	0.266
Tang et al., 2022, Lithos			The Erguna Massif	48.2753	48.2753	123.637	123.637				17DX15-2					123											59.461	0.795		19.013				4.30644	5.747	1.514	0.095		1.911	4.361	0.285
Tang et al., 2022, Lithos			The Erguna Massif	48.2753	48.2753	123.637	123.637				17DX15-3					123											59.433	0.787		19.181				4.30644	5.761	1.544	0.098		1.771	4.418	0.279
Tang et al., 2022, Lithos			The Erguna Massif	49.9481	49.9481	124.38	124.38				17DX19-1					115											48.651	1.232		16.459				8.21247	9.248	7.969	0.155		1.511	2.784	0.412
Tang et al., 2022, Lithos			The Erguna Massif	49.9481	49.9481	124.38	124.38				17DX19-2					115											49.384	1.255		16.649				7.96053	9.344	6.711	0.146		2.124	2.704	0.439
Tang et al., 2022, Lithos			The Erguna Massif	49.9481	49.9481	124.38	124.38				17DX19-3					115											48.916	1.252		16.345				8.25477	9.01	7.34	0.149		1.927	2.768	0.417
Tang et al., 2022, Lithos			The Erguna Massif	48.8531	48.8531	121.624	121.624				17ER6-1					112											56.846	1.689		15.063				7.61591	5.847	3.254	0.14		2.137	3.898	0.84
Tang et al., 2022, Lithos			The Erguna Massif	48.8531	48.8531	121.624	121.624				17ER6-2					112											56.849	1.687		15.071				7.51513	5.972	2.969	0.13		1.978	3.885	0.839
Tang et al., 2022, Lithos			The Erguna Massif	48.8531	48.8531	121.624	121.624				17ER6-3					112											57.139	1.692		15.101				7.38106	5.944	2.899	0.13		1.994	3.903	0.809
Tang et al., 2022, Lithos			The Erguna Massif	49.1169	49.1169	120.929	120.929				17ER7-1					118											55.373	1.692		15.521				8.14589	5.916	3.962	0.112		2.788	3.674	0.671
Tang et al., 2022, Lithos			The Erguna Massif	49.1169	49.1169	120.929	120.929				17ER7-2					118											55.326	1.673		15.414				8.36184	5.796	4.282	0.134		2.748	3.629	0.621
Tang et al., 2022, Lithos			The Erguna Massif	49.1169	49.1169	120.929	120.929				17ER7-3					118											54.995	1.682		15.513				8.42033	5.827	4.282	0.121		2.791	3.644	0.648
Tang et al., 2022, Lithos			The Erguna Massif	49.2061	49.2061	120.614	120.614				17ER8-1					116											57.861	1.694		14.985				7.50523	5.222	3.039	0.151		3.545	3.651	0.933
Tang et al., 2022, Lithos			The Erguna Massif	49.2061	49.2061	120.614	120.614				17ER8-2					116											57.831	1.679		14.82				7.70049	5.195	3.195	0.156		3.564	3.547	0.935
Tang et al., 2022, Lithos			The Erguna Massif	49.2061	49.2061	120.614	120.614				17ER8-3					116											57.959	1.68		15.014				7.24519	5.295	2.962	0.155		3.57	3.544	0.945
Tang et al., 2022, Lithos			The Erguna Massif	48.2694	48.2694	116.255	116.255				16ER6-2					163											57.34	1.15		16.52				6.95545	5.46	3.48	0.13		2.5	3.87	0.33
Tang et al., 2022, Lithos			The Erguna Massif	48.2694	48.2694	116.255	116.255				16ER6-3					163											57.41	1.62		16.08				6.96445	5.74	3.82	0.12		2.64	3.86	0.4
Tang et al., 2022, Lithos			The Erguna Massif	48.2694	48.2694	116.255	116.255				16ER6-4					163											57.47	1.6		16.04				6.95545	5.73	3.76	0.12		2.62	3.84	0.44
Tang et al., 2022, Lithos			The Erguna Massif	48.2694	48.2694	116.255	116.255				16ER6-6					163											57.38	1.64		16.02				6.99145	5.43	3.68	0.12		2.69	3.85	0.39
Tang et al., 2022, Lithos			The Erguna Massif	49.4728	49.4728	117.428	117.428				16ER9-2					160											59.09	1.14		18.39				5.57876	2.99	1.58	0.029		1.5	4.83	0.14
Tang et al., 2022, Lithos			The Erguna Massif	49.4728	49.4728	117.428	117.428				16ER9-3					160											58.62	1.15		18.08				5.69573	3.17	1.66	0.034		1.54	4.71	0.18
Tang et al., 2022, Lithos			The Erguna Massif	49.4728	49.4728	117.428	117.428				16ER9-4					160											59.14	1.12		17.86				5.54277	3.34	1.5	0.034		1.52	4.67	0.21
Tang et al., 2022, Lithos			The Erguna Massif	49.4728	49.4728	117.428	117.428				16ER9-6					160											58.91	1.13		18.16				5.64175	3.3	1.55	0.034		1.52	4.8	0.21
Tang et al., 2022, Lithos			The Erguna Massif	51.5972	51.5972	120.867	120.867				16ER25-2					160											60	0.84		17.57				5.30882	2.07	1.95	0.086		3.47	4.44	0.2
Tang et al., 2022, Lithos			The Erguna Massif	51.5972	51.5972	120.867	120.867				16ER25-3					160											55.18	1.63		16.07				7.88225	2.41	3.95	0.098		2.38	4.26	0.56
Tang et al., 2022, Lithos			The Erguna Massif	51.5972	51.5972	120.867	120.867				16ER25-5					160											52.89	1.37		17.84				7.86425	3.28	4.24	0.081		1.04	5.16	0.23
Wang et al., 2015, Lithos			The Erguna Massif	50.7339	50.7339	120.199	120.199				ER18-1					182											52.21	1.712		15.84				8.74606	7.194	3.22	0.1874		1.372	2.817	0.5284
Wang et al., 2015, Lithos			The Erguna Massif	50.7339	50.7339	120.199	120.199				ER18-2					182											51.01	1.817		16.91				9.12397	5.707	1.97	0.1542		1.633	4.686	0.5853
Wang et al., 2015, Lithos			The Erguna Massif	50.7339	50.7339	120.199	120.199				ER18-3					182											52.78	1.773		16.67				8.22417	5.888	2.51	0.0801		1.826	3.589	0.5664
Wang et al., 2015, Lithos			The Erguna Massif	50.7339	50.7339	120.199	120.199				ER18-4					182											52.71	1.7188		16.15				9.05199	6.892	2.62	0.1881		1.498	3.033	0.5383
Wang et al., 2015, Lithos			The Erguna Massif	50.7339	50.7339	120.199	120.199				ER18-5					182											51.23	1.7932		16.87				9.08798	5.889	2.48	0.1356		1.582	3.945	0.5734
Wang et al., 2015, Lithos			The Erguna Massif	50.7339	50.7339	120.199	120.199				ER18-6					182											49.83	1.7558		16.19				9.75383	7.625	2.65	0.1478		1.46	3.422	0.5413
Wang et al., 2015, Lithos			The Erguna Massif	51.3908	51.3908	121.052	121.052				13ER20-1					193											51.86	1.14		18.62				7.99922	4.23	5.03	0.06		1.29	4.86	0.26
Wang et al., 2015, Lithos			The Erguna Massif	51.3908	51.3908	121.052	121.052				13ER20-2					193											52.3	1.14		18.8				7.34237	4.59	5.09	0.058		1.29	4.71	0.26
Wang et al., 2015, Lithos			The Erguna Massif	49.5425	49.5425	119.853	119.853				13ER52-1					181											53.87	1.11		15.21				8.69207	5.04	3.1	0.27		1.13	4.51	0.32
Wang et al., 2015, Lithos			The Erguna Massif	49.5425	49.5425	119.853	119.853				13ER52-2					181											53.28	1.24		15.46				8.70107	4.41	3.13	0.26		1.06	4.96	0.34
Wang et al., 2015, Lithos			The Erguna Massif	49.5425	49.5425	119.853	119.853				13ER52-3					181											53.85	1.23		15.47				9.11497	4.1	2.97	0.26		1.93	4.21	0.32
Wang et al., 2015, Lithos			The Erguna Massif	49.5425	49.5425	119.853	119.853				13ER52-4					181											54.49	1.23		15.59				8.998	3.66	3.07	0.25		1.66	4.24	0.34
Wang et al., 2015, Lithos			The Erguna Massif	49.5425	49.5425	119.853	119.853				13ER52-5					181											55.4	1.19		14.52				8.66507	4.02	3.47	0.3		1.53	4.01	0.32
Wang et al., 2015, Lithos			The Erguna Massif	51.4322	51.4322	121.531	121.531				12ER25-3					186											54.5	1.21		17.4				7.37836	6.28	4.36	0.14		2.36	3.62	0.52
Wang et al., 2015, Lithos			The Erguna Massif	51.4322	51.4322	121.531	121.531				12ER26-1					186											58.58	0.86		16.81				5.45279	5.81	4.08	0.099		2.1	4.18	0.28
Wang et al., 2015, Lithos			The Erguna Massif	51.4322	51.4322	121.531	121.531				12ER26-2					186											52.22	1.02		17.42				6.81149	6.17	3.27	0.12		2.58	3.2	0.34
Wang et al., 2015, Lithos			The Erguna Massif	51.4322	51.4322	121.531	121.531				12ER26-3					186											53.27	1.03		17.86				6.7485	5.5	3.3	0.11		2.72	3.21	0.34
Fan et al., 2003, J. Volcanol. Geoth. Res.			The Erguna Massif	48.9	48.9	120.5	120.5				HLR-11					128											56.82	1.03		17.63		3.43	2.82	5.90631	6.09	3.81	0.08		1.84	3.69	0.38
Fan et al., 2003, J. Volcanol. Geoth. Res.			The Erguna Massif	48.9	48.9	120.5	120.5				HLR-13					128											55.74	1.07		17.97		3.65	3.06	6.34427	6.83	2.5	0.11		1.91	4.19	0.4
Fan et al., 2003, J. Volcanol. Geoth. Res.			The Erguna Massif	48.9	48.9	120.5	120.5				HLR-19					128											54.86	1		17.23		3.03	3.38	6.10639	6.89	2.59	0.09		1.69	4.14	0.37
Fan et al., 2003, J. Volcanol. Geoth. Res.			The Erguna Massif	50	50	121.8	121.8				EGN-19					128											55.22	1.36		17.7		6.47	1.27	7.09171	6.63	1.45	0.11		1.83	3.97	0.62
Fan et al., 2003, J. Volcanol. Geoth. Res.			The Erguna Massif	50	50	121.8	121.8				EGN-20					128											56.12	1.28		17.5		5.8	1.27	6.48884	6.22	2.27	0.12		2.18	4.02	0.62
Fan et al., 2003, J. Volcanol. Geoth. Res.			The Erguna Massif	50	50	121.8	121.8				EGN-21					128											55.82	1.31		17.43		5.8	1	6.21884	6.83	1.82	0.12		2.42	4.27	0.62
Fan et al., 2003, J. Volcanol. Geoth. Res.			The Erguna Massif	50	50	121.8	121.8				EGN-24					128											56.68	1.23		17.91		6.04	1.32	6.75479	4.46	1.77	0.1		2.45	5.32	0.58
Fan et al., 2003, J. Volcanol. Geoth. Res.			The Erguna Massif	50	50	121.8	121.8				EGN-26					128											52.66	1.49		17.5		6.51	1.61	7.4677	5.75	2.73	0.13		2.79	4	0.82
Fan et al., 2003, J. Volcanol. Geoth. Res.			The Erguna Massif	50	50	121.8	121.8				EGN-27					128											54.34	1.52		17.7		5.8	1.04	6.25884	4.6	1.82	0.12		3.06	4.29	0.72
Fan et al., 2003, J. Volcanol. Geoth. Res.			The Erguna Massif	50	50	121.8	121.8				EGN-28					128											54.4	1.28		17.23		5.34	1.83	6.63493	7.71	2.41	0.16		1.95	3.9	0.58
Fan et al., 2003, J. Volcanol. Geoth. Res.			The Erguna Massif	50	50	121.8	121.8				EGN-29					128											54.68	1.26		17.23		4.63	2.36	6.52607	7.44	2.73	0.13		2.05	4.09	0.6
Fan et al., 2003, J. Volcanol. Geoth. Res.			The Erguna Massif	50	50	121.8	121.8				EGN-30					128											51.62	1.54		17.57		7.5	1.2	7.9485	7.57	2.73	0.1		1.51	4.01	0.68
Fan et al., 2003, J. Volcanol. Geoth. Res.			The Erguna Massif	50	50	121.8	121.8				EGN-31					128											52.1	1.58		17.5		6.25	2.98	8.60375	3.38	4	0.11		1.68	5	0.69
Meng et al., 2011, Acta Petrol.Sin.			The Erguna Massif	49.3989	49.3989	117.422	117.422				MZ10-2					125											57.24	1.2		16.14				6.01066	7.46	2.42	0.1		2.93	3.84	0.5
Meng et al., 2011, Acta Petrol.Sin.			The Erguna Massif	49.3989	49.3989	117.422	117.422				MZ10-4					125											57.29	1.22		15.83				6.64052	5.67	3.79	0.08		2.92	4.03	0.5
Meng et al., 2011, Acta Petrol.Sin.			The Erguna Massif	49.445	49.445	117.042	117.042				MZ21-1					129											48.8	1.57		14.79				8.76405	7.98	9.61	0.13		1.68	3.09	0.42
Meng et al., 2011, Acta Petrol.Sin.			The Erguna Massif	49.445	49.445	117.042	117.042				MZ21-2					129											48.8	1.58		14.85				8.78205	7.94	9.63	0.13		1.69	3.08	0.41
Meng et al., 2011, Acta Petrol.Sin.		Western Hulun Lake	The Erguna Massif	49.3667	49.3667	117.5	117.5				ZKX24-04-01	Dacitic Ignimbrite				142											68.9	0.56		15.07				2.48345	1.23	0.39	0.07		5.58	3.98	0.15
Meng et al., 2011, Acta Petrol.Sin.		Western Hulun Lake	The Erguna Massif	49.3667	49.3667	117.5	117.5				ZKX24-04-02	Trachydacite				142											69.61	0.6		14.74				2.32148	0.88	0.18	0.05		5.54	4.35	0.16
Xu et al., 2011, Geological Bulletin of China		Jixiangfeng Fm.	The Erguna Massif	50.7459	50.7459	120.189	120.189				ER17-4	Dacitic Ignimbrite				143											73.96	0.19		13.75				0.8998	0.18	0.01	0.12		5.5	3.84	0.02
Xu et al., 2011, Geological Bulletin of China		Jixiangfeng Fm.	The Erguna Massif	50.7459	50.7459	120.189	120.189				ER17-2	Trachydacite				143											72.89	0.21		14.49				0.98978	0.28	0.03	0.11		4.87	4.55	0.03
Yang et al., 2017, Journal of Jilin University			The Erguna Massif	48.2	48.2	118.8	118.8				JWL-Z-1-1					146											71.65	0.58		15.92		0.81	1.96	2.68884	1.85	0.89	0.13		5.85	3.31	0.17
Yang et al., 2017, Journal of Jilin University			The Erguna Massif	48.2	48.2	118.8	118.8				JWL-Z-1-2					146											72.36	0.56		15.84		0.9	1.76	2.56982	1.6	0.87	0.12		6.15	2.86	0.15
Yang et al., 2017, Journal of Jilin University			The Erguna Massif	48.2	48.2	118.8	118.8				JWL-Z-2-1					146.4											71.59	0.46		15.48		0.74	1.67	2.33585	1.25	0.58	0.13		5.71	4.15	0.1
Yang et al., 2017, Journal of Jilin University			The Erguna Massif	48.2	48.2	118.8	118.8				JWL-Z-2-2					146											71.6	0.46		15.45		0.79	1.69	2.40084	1.16	0.55	0.12		5.75	4.16	0.1
[truncated: 122 more columns]

## Sheet: Yanshan Mountains (YSM)
CITATIONS	TECTONIC SETTING	LOCATION	LOCATION COMMENT	LATITUDE MIN	LATITUDE MAX	LONGITUDE MIN	LONGITUDE MAX	LAND OR SEA	ELEVATION MIN	ELEVATION MAX	SAMPLE NAME	ROCK NAME	MIN. AGE (YRS.)	MAX. AGE (YRS.)	GEOL.	AGE	ERUPTION DAY	ERUPTION MONTH	ERUPTION YEAR	ROCK TEXTURE	ROCK TYPE	DRILL DEPTH MIN	DRILL DEPTHAX	ALTERATION	MINERAL	MATERIAL	SIO2(WT%)	TIO2(WT%)	B2O3(WT%)	AL2O3(WT%)	CR2O3(WT%)	FE2O3(WT%)	FEO(WT%)	FEOT(WT%)	CAO(WT%)	MGO(WT%)	MNO(WT%)	NIO(WT%)	K2O(WT%)	NA2O(WT%)	P2O5(WT%)	H2O(WT%)	H2OP(WT%)	H2OM(WT%)	H2OT(WT%)	CO2(WT%)	CO1(WT%)	F(WT%)	CL(WT%)
Wu et al., 2022, Lithos				41.2226	41.2226	120.77	120.77				19JH43	Andesite				160											66.3678	0.6659		15.4878				3.33826	2.32	1.13	0.0772		4.0448	3.6305	0.2847
Wu et al., 2022, Lithos				41.2226	41.2226	120.767	120.767				19JH44	Andesite				160											56.1669	0.8034		18.2359				6.91346	6.31667	2.64333	0.1089		2.04547	3.8736	0.309533
Wu et al., 2022, Lithos				41.222	41.222	120.759	120.759				19JH45-1	Trachyte				160											57.2851	0.8958		16.8142				6.64052	3.13	2.27667	0.0635		3.34583	6.09723	0.413233
Wu et al., 2022, Lithos				41.222	41.222	120.759	120.759				19JH45-1r*					160
Wu et al., 2022, Lithos				41.222	41.222	120.759	120.759				19JH45-2	Trachyte				160											59.865	0.86415		16.805				6.3121	2.545	1.04	0.0693		3.1425	7.10685	0.4388
Wu et al., 2022, Lithos				41.2229	41.2229	120.758	120.758				19JH46	Andesite				160											59.525	0.72245		17.33				5.52027	4.52	2.025	0.062		3.13355	4.79415	0.38345
Wu et al., 2022, Lithos				41.2213	41.2213	120.748	120.748				19JH47	Andesitic Tuff				160											60	0.8037		16.945				5.53377	3.34	1.825	0.0594		2.6764	5.72335	0.4751
Wu et al., 2022, Lithos				41.2231	41.2231	120.732	120.732				19JH48	Andesite				161.8											66.26	0.3537		16.3				3.28427	2.03	0.34	0.0705		3.8918	4.7505	0.2429
Wu et al., 2022, Lithos				41.2227	41.2227	120.732	120.732				19JH49	Andesite				157.5											66.5767	0.3687		16.8733				2.60042	2.51333	0.376667	0.0349		3.72517	4.42867	0.241467
Wu et al., 2022, Lithos				41.2229	41.2229	120.717	120.717				19JH50	Andesite				160											54.5647	0.900933		17.6486				7.42335	6.92667	3.86667	0.106533		1.87107	3.86743	0.3316
Wu et al., 2022, Lithos				41.2229	41.2229	120.717	120.717				19JH50r*					160
Wu et al., 2022, Lithos				41.1158	41.1158	120.626	120.626				19JH52	Andesite				160											61.78	0.761033		16.4833				4.66096	3.52667	1.68	0.0500667		2.55723	4.27863	0.355467
Wu et al., 2022, Lithos				41.1178	41.1178	120.622	120.622				19JH53	Andesite				160											58.3	0.70295		17.325				5.37181	5.41	2.62	0.09885		2.6478	4.49555	0.4002
Wu et al., 2022, Lithos				41.1282	41.1282	120.603	120.603				19JH54	Andesitic Tuff				160											62.32	0.6642		14.7267				5.26083	4.61	2.64333	0.0688		1.7836	4.04363	0.3065
Wu et al., 2022, Lithos				41.1449	41.1449	120.571	120.571				19JH55	Andesite				160											63.36	0.4433		16.855				3.99061	3.115	1.46	0.05915		3.05025	4.8835	0.3024
Wu et al., 2022, Lithos				41.1284	41.1284	120.558	120.558				19JH56	Andesite				160											58.05	0.84625		16.975				5.8532	7	1.175	0.07005		1.89145	4.0143	0.3796
Wu et al., 2022, Lithos				41.1333	41.1333	120.52	120.52				19JH57	Andesite				160											57.5	0.7603		16.76				6.53255	5.83	3.78	0.09865		2.0014	4.2537	0.31905
Wu et al., 2022, Lithos				41.1482	41.1482	120.493	120.493				19JH58	Andesite				160											60.755	0.90235		15.645				4.9264	4.95	2.87	0.08075		2.3297	3.7847	0.3725
Wu et al., 2022, Lithos				41.1886	41.1886	120.425	120.425				19JH59	Andesite				160											56.77	0.93135		16.945				6.07815	5.935	3.41	0.0913		2.2703	4.6285	0.44145
Hu et al., 2019, Minerals				40.3667	40.3667	120.575	120.575				XDB-40	Garnet-Bearing Adamellite				155											74.24	0.13		13.98				2.2495	0.93	0.21	0.05		4.89	3.79	0.01
Hu et al., 2019, Minerals				40.3667	40.3667	120.575	120.575				XDB-42	Garnet-Bearing Adamellite				152											75.55	0.06		12.3				1.45768	0.79	0.1	0.06		4.65	4.06	0.02
Hu et al., 2019, Minerals				40.3667	40.3667	120.575	120.575				XDB-70	Garnet-Bearing Adamellite				155											74.48	0.05		13.96				1.30471	0.89	0.13	0.05		3.98	4.41	0.01
Hu et al., 2019, Minerals				40.3667	40.3667	120.575	120.575				XDP1-2	Garnet-Bearing Adamellite				158											74.52	0.14		13.87				1.64663	0.88	0.2	0.05		4.19	4.41	0.02
Hu et al., 2019, Minerals				40.3667	40.3667	120.575	120.575				XDP1-8	Biotite Adamellite				168											67.42	0.66		13.39				6.82048	1.2	1.13	0.15		4.72	3.54	0.07
Hu et al., 2019, Minerals				40.3667	40.3667	120.575	120.575				XDB-57	Biotite Adamellite				172											69.52	0.35		12.85				4.83193	1.68	0.77	0.12		2.81	4.75	0.05
Hu et al., 2019, Minerals				40.3667	40.3667	120.575	120.575				XDB-68	Biotite Adamellite				170											66.86	0.48		13.16				7.6483	0.84	0.83	0.15		4.5	3.81	0.07
Wan et al., 2019, Gondwana Research				40.3775	40.3775	120.576	120.576				TL-1	Diorite				165											51.69	0.83		16.14				6.46956	6.41	1.78	0.1		3.13	3.99	0.76
Wan et al., 2019, Gondwana Research				40.3692	40.3692	120.588	120.588				TL-2	Diorite				140											61.12	0.55		17.51				4.13908	4.44	2.47	0.06		2.39	4.8	0.2
Wan et al., 2019, Gondwana Research				40.3583	40.3583	120.567	120.567				TL-3	Lamprophyre				139											52.57	1.75		15.09				10.0148	4.29	4.53	0.12		2.42	5.18	1.54
Wan et al., 2019, Gondwana Research				40.3778	40.3778	120.576	120.576				TL-4	Lamprophyre				139											47.87	1.74		14.88				9.8888	7.49	7.16	0.14		1.5	3.15	0.45
Wan et al., 2019, Gondwana Research				40.3583	40.3583	120.567	120.567				TL-5	Lamprophyre				139											45.95	1.54		12.85				10.8876	8.77	10.77	0.17		1.32	2.48	0.7
Wan et al., 2019, Gondwana Research				40.3675	40.3675	120.589	120.589				TL-6	Vogesite				162											46.36	1.43		10.75				10.3297	9.36	14.76	0.18		0.69	2.46	0.39
Wan et al., 2019, Gondwana Research				40.3675	40.3675	120.59	120.59				TL-7	Vogesite				156											47.33	2.21		13.47				12.3992	7.38	6.59	0.16		2.36	4.31	1.36
Wan et al., 2019, Gondwana Research				40.3781	40.3781	120.591	120.591				TL-8	Biotite amphibolite				140											48.32	2		12.51				14.8017	9.54	5.43	0.24		1.75	1.86	0.21
Wan et al., 2019, Gondwana Research				40.3583	40.3583	120.567	120.567				TL-9	Farrisite				152											47.16	1.42		14.02				11.0226	7.56	7.74	0.16		2.39	3.04	0.97
Wan et al., 2019, Gondwana Research				40.3583	40.3583	120.567	120.567				TL-10	Farrisite				152											47.34	1.61		12.11				10.0688	9.06	11.88	0.17		1.31	3.09	0.44
Liu et al., 2021, OGR				41.5583	41.5583	119.33	119.33				ZK1105-YQ1	Volcanic rocks				158											58.63	0.88		16.96		3.34	2.93	5.93533	4.78	1.89	0.07		3.3	4.7	0.42
Liu et al., 2021, OGR				41.5583	41.5583	119.33	119.33				ZK801-YQ1	Volcanic rocks				158											64.27	0.73		16.04		2.19	1.69	3.66056	2.51	0.89	0.09		4.12	5.03	0.23
Liu et al., 2021, OGR				41.5583	41.5583	119.33	119.33				ZK707-YQ2	Volcanic rocks				158											64.69	0.64		14.62		2.75	2.61	5.08445	1.17	0.56	0.09		3.82	5.74	0.18
Liu et al., 2021, OGR				41.5583	41.5583	119.33	119.33				ZK804-YQ1	Volcanic rocks				158											61.11	0.78		16.79		2.59	2.59	4.92048	3.02	1.47	0.09		3.52	4.45	0.36
Liu et al., 2021, OGR				41.5583	41.5583	119.33	119.33				ZK1103-YQ1	Volcanic rocks				158											57.91	1.07		16.93		4.14	3.13	6.85517	5.2	2.44	0.14		2.62	3.88	0.36
Liu et al., 2021, OGR				41.5583	41.5583	119.33	119.33				ZK1603-YQ1	Volcanic rocks				158											56.74	1.04		16.71		2.94	4.23	6.87541	5.12	3.56	0.11		2.66	4.08	0.34
Liu et al., 2021, OGR				41.5583	41.5583	119.33	119.33				ZK1601-YQ1	Volcanic rocks				158											63.91	0.6		16.49		2.86	1.46	4.03343	2.47	1.36	0.08		3.66	4.4	0.22
Liu et al., 2021, OGR				41.5583	41.5583	119.33	119.33				ZK403-YQ1	Granite porphyry				149											70.56	0.25		14.27		0.78	1.44	2.14184	0.67	0.44	0.09		5.22	3.42	0.07
Liu et al., 2021, OGR				41.5583	41.5583	119.33	119.33				ZK303-YQ1	Granite porphyry				149											71.67	0.17		14.51		0.37	1.45	1.78293	0.37	0.29	0.19		5.5	2.27	0.04
Liu et al., 2021, OGR				41.5583	41.5583	119.33	119.33				ZK004-YQ1	Granite porphyry				149											71.35	0.17		14.3		0.62	1.4	1.95788	0.47	0.27	0.08		5.33	3.94	0.03
Dong et al., 2020, IGR				40.5889	40.5889	117.89	117.89				16WF51					129											61.685	0.959		14.731				5.81451	3.82	2.713	0.078		4.142	4.273	0.423
Dong et al., 2020, IGR				40.5992	40.5992	117.81	117.81				16SW121					129											61.697	1.053		14.816				5.60665	3.44	2.57	0.08		4.649	4.262	0.48
Dong et al., 2020, IGR				40.6022	40.6022	117.809	117.809				16SW123					129											60.841	1.163		15.241				6.00347	3.572	2.495	0.084		4.492	4.283	0.539
Dong et al., 2020, IGR				40.6717	40.6717	117.861	117.861				16XB82					129											60.282	0.986		15.554				5.62465	3.859	3.102	0.08		4.091	4.513	0.478
Dong et al., 2020, IGR				40.6669	40.6669	117.858	117.858				16XB83					129											61.805	0.844		15.327				5.24134	3.842	2.874	0.081		4.289	4.251	0.389
Dong et al., 2020, IGR				40.5872	40.5872	117.887	117.887				16WF52					129											61.965	0.898		15.134				5.4096	3.807	2.663	0.072		4.342	4.372	0.399
Dong et al., 2020, IGR				40.5839	40.5839	117.884	117.884				16WF54					129											63.577	0.789		14.938				4.88142	3.41	2.318	0.069		4.353	4.328	0.352
Dong et al., 2020, IGR				40.5803	40.5803	117.881	117.881				16WF69					129											62.595	0.841		15.165				5.35741	3.441	2.347	0.071		4.523	4.512	0.363
Dong et al., 2018, Earth Science Frontiers				40.5817	40.5817	117.884	117.884				16WF57*					129											64.946	0.692		15.067				4.20746	2.976	2.082	0.062		4.415	4.508	0.328
Dong et al., 2018, Earth Science Frontiers				40.5928	40.5928	117.844	117.844				16BZ72*					129											63.34	0.875		14.282				5.30072	3.608	2.376	0.079		4.099	4.378	0.509
Dong et al., 2018, Earth Science Frontiers				40.5989	40.5989	117.844	117.844				16BZ74*					129											66.762	0.607		14.796				4.12828	2.521	1.363	0.053		4.334	4.459	0.307
Dong et al., 2018, Earth Science Frontiers				40.6042	40.6042	117.844	117.844				16BZ76*					129											67.063	0.563		14.511				3.80795	2.291	1.274	0.048		4.596	4.411	0.28
Dong et al., 2018, Earth Science Frontiers				40.6608	40.6608	117.853	117.853				16XB84*					129											61.888	0.852		15.257				5.07217	3.801	2.971	0.084		4.178	4.33	0.404
Dong et al., 2018, Earth Science Frontiers				40.5961	40.5961	117.808	117.808				16SW102*					129											59.929	1.093		15.308				6.11504	4.131	3.204	0.084		4.056	4.461	0.523
Dong et al., 2018, Earth Science Frontiers				40.5914	40.5914	117.811	117.811				16BJ146*					129											65.654	0.706		14.958				4.08419	2.885	1.81	0.068		3.868	4.935	0.377
Dong et al., 2018, Earth Science Frontiers				40.5872	40.5872	117.899	117.899				16WF65*					129											56.633	1.294		15.984				6.61353	5.04	3.838	0.088		3.915	4.638	0.617
Dong et al., 2018, Earth Science Frontiers				40.5833	40.5833	117.895	117.895				16WF89*					129											57.153	1.025		15.014				6.53435	5.239	3.958	0.137		4.959	4.1	0.432
Dong et al., 2020, IGR				40.6386	40.6386	117.836	117.836				18FJ10					129											58.224	1.09682		16.4051				5.32715	5.05322	5.01816	0.086391		3.61832	4.15443	0.510649
Dong et al., 2020, IGR				40.6342	40.6342	117.838	117.838				18FJ11					129											56.7955	1.18496		16.9788				5.9435	5.68906	4.7995	0.092324		3.01318	4.4255	0.620501
Dong et al., 2020, IGR				40.6283	40.6283	117.893	117.893				18NG14					129											58.5837	1.40016		15.3311				6.27447	4.40909	3.39126	0.078212		3.64169	4.45562	0.620533
Dong et al., 2020, IGR				40.6233	40.6233	117.888	117.888				18NG15					129											58.6808	1.24808		16.4169				5.01181	4.0167	3.29146	0.073042		4.32137	4.63798	0.510376
Dong et al., 2020, IGR				40.6211	40.6211	117.882	117.882				18NG18					129											55.8865	2.05449		15.8398				7.41732	3.6868	4.19875	0.10302		3.26262	5.02176	0.964752
Dong et al., 2020, IGR				40.6	40.6	117.898	117.898				18PJ25					129											56.7955	1.06211		16.2719				5.64003	5.06926	4.7811	0.090022		3.44627	4.39631	0.588451
Dong et al., 2020, IGR				40.6064	40.6064	117.845	117.845				16WF67					129											54.432	1.432		17				7.45844	5.503	3.812	0.073		2.716	5.105	0.748
Dong et al., 2020, IGR				40.5992	40.5992	117.81	117.81				16SW125					129											54.99	1.262		13.566				7.46384	6.1	6.692	0.107		3.567	3.798	0.577
Dong et al., 2020, IGR				40.5878	40.5878	117.844	117.844				16BZ73					129											52.663	2.134		15.564				9.15547	6.385	4.365	0.159		1.802	5.434	1.057
Dong et al., 2020, IGR				40.6631	40.6631	117.856	117.856				18XB05					129											56.5358	1.45721		16.3329				6.04752	5.75214	5.59185	0.1031		2.93744	4.33813	0.674047
Dong et al., 2020, IGR				40.6625	40.6625	117.856	117.856				18XB07					129											55.4969	1.4762		15.6968				6.50675	5.54626	5.54314	0.112182		3.23372	4.22819	0.70851
Dong et al., 2020, IGR				40.6717	40.6717	117.855	117.855				18XB09					129											54.0684	1.4181		16.7617				6.74641	6.55642	4.6891	0.124981		3.05374	4.53328	0.511783
Dong et al., 2020, IGR				40.6233	40.6233	117.888	117.888				18NG16					129											53.1594	2.27175		16.2657				7.83739	6.076	4.95213	0.110341		3.24361	4.26772	1.29175
Dong et al., 2020, IGR				40.6144	40.6144	117.848	117.848				18BZ22					129											53.549	1.72321		16.4828				6.76952	5.4846	5.39376	0.101165		3.56181	4.19675	0.783042
Dong et al., 2020, IGR				40.6106	40.6106	117.798	117.798				18CL27					129											54.8487	1.87769		15.5208				8.11685	4.64246	4.00048	0.16069		2.15868	5.48223	0.861922
Dong et al., 2020, IGR				40.6086	40.6086	117.791	117.791				18CL29					129											56.8657	1.93751		15.1568				6.44299	4.75246	3.61208	0.117889		3.88909	4.66179	0.587507
Fu et al., 2012, Lithos		Chifeng		41.9583	41.9583	120.3	120.3				BHG3	Granite				128											68.47	0.32		15.13		1.45	1.12	2.42471	2.37	0.99	0.04		4.19	4.28	0.12
Fu et al., 2012, Lithos		Chifeng		41.9583	41.9583	120.3	120.3				BHG4	Granite				128											68.66	0.32		15.02		1.36	1.22	2.44373	2.44	0.97	0.04		4.1	4.25	0.12
Fu et al., 2012, Lithos		Chifeng		41.9583	41.9583	120.3	120.3				BHG5	Granite				128											68.27	0.33		15.24		1.54	1.01	2.39569	2.3	1.02	0.04		4.27	4.3	0.12
Fu et al., 2012, Lithos		Chifeng		41.9583	41.9583	120.3	120.3				BHG8	Granite				128											67.45	0.36		15.38		2.03	0.85	2.67659	2.51	1.31	0.04		3.98	4.22	0.14
Fu et al., 2012, Lithos		Chifeng		41.9583	41.9583	120.3	120.3				BHG9	Granite				128											68.13	0.34		15.21		1.64	1.03	2.50567	2.42	1.1	0.04		4.12	4.26	0.12
Fu et al., 2012, Lithos		Chifeng		41.9583	41.9583	120.3	120.3				HG4	Granite				128											64.69	0.47		16.14		2.03	1.95	3.77659	3.09	1.73	0.06		4.03	4.46	0.25
Fu et al., 2012, Lithos		Chifeng		41.9583	41.9583	120.3	120.3				HG5	Granite				128											64.86	0.45		16.01		2.06	1.74	3.59359	2.96	1.63	0.05		3.96	4.48	0.23
Fu et al., 2012, Lithos		Chifeng		41.9583	41.9583	120.3	120.3				HG9	Granite				128											64.52	0.5		16.26		2	2.15	3.9496	3.21	1.83	0.07		4.09	4.43	0.27
Fu et al., 2012, Lithos		Chifeng		41.9583	41.9583	120.3	120.3				HG10	Granite				128											63.41	0.53		16.31		2.01	2.47	4.2786	3.4	2.02	0.07		3.83	4.38	0.29
Fu et al., 2012, Lithos		Chifeng		41.9583	41.9583	120.3	120.3				HG11	Granite				128											64.26	0.49		16.19		2.02	2.12	3.9376	3.19	1.83	0.06		3.96	4.43	0.26
Zhang et al., 2003, Geochimica et Cosmochimica Acta				41.4544	41.4544	121.105	121.105				JG-1	Basalts				122											44.84	2.92		14.79		11.57			10.27	8.31	0.17		1.88	3.19	0.64
Zhang et al., 2003, Geochimica et Cosmochimica Acta				41.4544	41.4544	121.105	121.105				JG-2	Basalts				122											45.48	2.89		14.51		11.51			10.34	8.25	0.17		1.93	2.7	0.62
Zhang et al., 2003, Geochimica et Cosmochimica Acta				41.4544	41.4544	121.105	121.105				JG-3	Basalts				122											44.82	2.93		14.81		11.68			10.52	8.38	0.17		1.93	3	0.65
Zhang et al., 2003, Geochimica et Cosmochimica Acta				41.4544	41.4544	121.105	121.105				JG-4	Basalts				122											45.92	2.85		14.27		11.37			10.11	8.09	0.17		1.8	3.03	0.62
Zhang et al., 2003, Geochimica et Cosmochimica Acta				41.4544	41.4544	121.105	121.105				JG-5	Basalts				122											45.01	2.95		14.59		11.78			10.32	8.3	0.17		1.91	3.33	0.66
Zhang et al., 2003, Geochimica et Cosmochimica Acta				41.4544	41.4544	121.105	121.105				JG-6	Basalts				122											46.07	2.88		14.36		11.38			10.07	8.06	0.17		1.8	3.18	0.63
Zhang et al., 2003, Geochimica et Cosmochimica Acta				41.4544	41.4544	121.105	121.105				JG-7	Basalts				122											43.4	2.95		14.88		11.78			10.32	8.39	0.17		1.91	3.33	0.66
Zhang et al., 2003, Geochimica et Cosmochimica Acta				41.4544	41.4544	121.105	121.105				JG-8	Basalts				122											45.5	2.85		14.37		11.51			10.27	8.16	0.17		1.87	3.09	0.63
Zhang et al., 2003, Geochimica et Cosmochimica Acta				41.4544	41.4544	121.105	121.105				JG-9	Basalts				122											44.82	2.93		14.81		11.75			10.62	8.3	0.17		1.78	3.03	0.63
Zhang et al., 2003, Geochimica et Cosmochimica Acta				41.4586	41.4586	120.23	120.23				NTS-01	Andesite				122											50.4	1.71		16.83		6.96			6.05	5.6	0.12		2.97	4.41	0.82
Zhang et al., 2003, Geochimica et Cosmochimica Acta				41.4586	41.4586	120.23	120.23				NTS-02	Andesite				122											48.87	1.86		18.21		7.58			6.43	5.34	0.13		3.47	5.34	0.88
Zhang et al., 2003, Geochimica et Cosmochimica Acta				41.4586	41.4586	120.23	120.23				NTS-03	Andesite				122											49.26	1.79		17.49		7.34			6.44	5.62	0.12		3.09	4.66	0.85
Zhang et al., 2003, Geochimica et Cosmochimica Acta				41.4586	41.4586	120.23	120.23				NTS-04	Andesite				122											48.81	1.79		17.4		7.24			6.29	5.87	0.12		3.1	4.67	0.85
Zhang et al., 2003, Geochimica et Cosmochimica Acta				41.4586	41.4586	120.23	120.23				NTS-05	Andesite				122											48.53	1.82		18.01		7.48			6.44	5.79	0.12		3.25	4.75	0.86
Zhang et al., 2003, Geochimica et Cosmochimica Acta				41.4586	41.4586	120.23	120.23				NTS-06	Andesite				122											48.66	1.85		18.22		7.48			6.52	5.85	0.13		3.26	4.82	0.87
Zhang et al., 2003, Geochimica et Cosmochimica Acta				41.4586	41.4586	120.23	120.23				NTS-07	Andesite				122											47.98	1.87		18.43		7.55			6.27	5.49	0.13		3.47	5.9	0.89
Zhang et al., 2003, Geochimica et Cosmochimica Acta				41.4586	41.4586	120.23	120.23				NTS-08	Andesite				122											51.3	1.74		17.04		7.15			5.98	5.2	0.12		2.98	5.41	0.82
Zhang et al., 2003, Geochimica et Cosmochimica Acta				41.4586	41.4586	120.23	120.23				NTS-09	Andesite				122											55.51	1.1		15.51		7.45			5.93	4.24	0.1		2.57	3.98	0.57
Zhang et al., 2003, Geochimica et Cosmochimica Acta		Wulanhada Fuxin		41.4544	41.4544	121.105	121.105				WLHD-01**	High-Mg Andesite				122											52.96	1.11		14.8		8.02			7.28	8.06	0.11		1.84	3.68	0.31
Zhang et al., 2003, Geochimica et Cosmochimica Acta		Wulanhada Fuxin		41.4544	41.4544	121.105	121.105				WLHD-02**	High-Mg Andesite				122											52.47	1.08		14.8		7.91			7.01	8.27	0.12		1.89	3.71	0.3
Zhang et al., 2003, Geochimica et Cosmochimica Acta		Wulanhada Fuxin		41.4544	41.4544	121.105	121.105				WLHD-03**	High-Mg Andesite				122											55	1.05		14.35		7.67			6.65	8.05	0.11		1.82	3.55	0.29
Zhang et al., 2003, Geochimica et Cosmochimica Acta		Wulanhada Fuxin		41.4544	41.4544	121.105	121.105				WLHD-04**	High-Mg Andesite				122											53.7	1.09		14.63		7.95			6.9	8.28	0.11		1.87	3.65	0.32
Zhang et al., 2003, Geochimica et Cosmochimica Acta		Wulanhada Fuxin		41.4544	41.4544	121.105	121.105				WLHD-05**	High-Mg Andesite				122											55.32	1.06		14.24		7.77			6.88	7.91	0.11		1.76	3.52	0.3
Zhang et al., 2003, Geochimica et Cosmochimica Acta		Wulanhada Fuxin		41.4544	41.4544	121.105	121.105				WLHD-06**	High-Mg Andesite				122											57.07	1.01		13.4		7.39			6.62	7.52	0.11		1.69	3.39	0.28
Zhang et al., 2003, Geochimica et Cosmochimica Acta		Guancaishan Fuxin		41.4544	41.4544	121.105	121.105				GCS-01**	Andesite				122											61.84	0.74		16.22		5.57			4.83	2.64	0.09		2.52	3.75	0.22
Zhang et al., 2003, Geochimica et Cosmochimica Acta		Guancaishan Fuxin		41.4544	41.4544	121.105	121.105				GCS-02**	Andesite				122											60.31	0.77		16.89		5.99			5.09	2.83	0.09		2.63	3.92	0.23
Zhang et al., 2003, Geochimica et Cosmochimica Acta		Guancaishan Fuxin		41.4544	41.4544	121.105	121.105				GCS-03**	Andesite				122											60.37	0.77		16.77		5.91			5.04	2.71	0.09		2.53	3.8	0.22
Zhang et al., 2003, Geochimica et Cosmochimica Acta		Guancaishan Fuxin		41.4544	41.4544	121.105	121.105				GCS-04**	Andesite				122											61.8	0.74		16.32		5.57			4.9	2.57	0.09		2.48	3.72	0.22
Zhang et al., 2003, Geochimica et Cosmochimica Acta		Guancaishan Fuxin		41.4544	41.4544	121.105	121.105				GCS-05**	Andesite				122											60.82	0.77		17.14		5.97			5.14	2.73	0.1		2.64	3.9	0.23
Zhang et al., 2003, Geochimica et Cosmochimica Acta		Guancaishan Fuxin		41.4544	41.4544	121.105	121.105				GCS-06**	Andesite				122											63.53	0.7		15.49		5.1			4.54	2.44	0.08		2.39	3.5	0.21
Yuan et al., 2006, Science in China: Series D Earth Sciences		Western Hill	Tiaojishan Fm.	39.9785	39.9785	115.914	115.914				﻿DT-05	Andeisite				137											60.45	0.71		16.68				5.33581	4.22	2.83	0.11		2.34	4.81	0.26
Yuan et al., 2006, Science in China: Series D Earth Sciences		Western Hill	Tiaojishan Fm.	39.9785	39.9785	115.914	115.914				DT-06	Andesite				137											60.23	0.83		15.93				6.18163	4.01	3.23	0.1		2.4	4.1	0.3
Yuan et al., 2006, Science in China: Series D Earth Sciences		Western Hill	Tiaojishan Fm.	39.9785	39.9785	115.914	115.914				DT-09	Andesite				137											58.61	0.66		17.84				5.61475	3.68	2.73	0.1		3.28	4.54	0.34
Yuan et al., 2006, Science in China: Series D Earth Sciences		Western Hill	Tiaojishan Fm.	39.9785	39.9785	115.914	115.914				DT-11	Andesite				137											56.67	0.84		17.87				6.18163	4.93	2.6	0.14		2.76	4.23	0.51
Yuan et al., 2006, Science in China: Series D Earth Sciences		Western Hill	Tiaojishan Fm.	39.9785	39.9785	115.914	115.914				DT-12	Andesite				137											58.71	1.14		17.13				6.2896	4.68	2.42	0.08		4.11	3.37	0.55
Yuan et al., 2006, Science in China: Series D Earth Sciences		Western Hill	Tiaojishan Fm.	39.9785	39.9785	115.914	115.914				DT-15	Andesite				137											60.83	0.59		17.45				5.08387	4	2.15	0.1		2.68	4.72	0.34
Yuan et al., 2006, Science in China: Series D Earth Sciences		Western Hill	Tiaojishan Fm.	39.9785	39.9785	115.914	115.914				DT-16	Andesite				137											63.72	0.68		14.94				5.30882	4.89	1.54	0.08		1.88	3.91	0.34
Yuan et al., 2006, Science in China: Series D Earth Sciences		Western Hill	Tiaojishan Fm.	39.9785	39.9785	115.914	115.914				DT-17	Andesite				137											55.93	0.86		18.81				6.55954	5.66	2.8	0.12		3.03	4.04	0.44
Yuan et al., 2006, Science in China: Series D Earth Sciences		Western Hill	Tiaojishan Fm.	39.9785	39.9785	115.914	115.914				DT-19	Basalt				137											50.75	1.1		17.25				8.28716	5.01	5.27	0.13		2.41	4.39	0.35
Yuan et al., 2006, Science in China: Series D Earth Sciences		Western Hill	Tiaojishan Fm.	39.9785	39.9785	115.914	115.914				DT-24	Andesite				137											53.96	1.05		17.16				7.48634	7.01	5.4	0.1		1.46	3.69	0.35
Yuan et al., 2006, Science in China: Series D Earth Sciences		Western Hill	Tiaojishan Fm.	39.9785	39.9785	115.914	115.914				DT-25	Rhyolite				137											70.24	0.65		13.29				3.66219	2.59	1.27	0.06		2.91	2.97	0.18
Yuan et al., 2006, Science in China: Series D Earth Sciences		Western Hill	Tiaojishan Fm.	39.9785	39.9785	115.914	115.914				DT-26	Andesite				137											53.26	1.01		16.48				7.27938	6.75	4.81	0.13		1.86	3.42	0.34
Yuan et al., 2006, Science in China: Series D Earth Sciences		Western Hill	Tiaojishan Fm.	39.9785	39.9785	115.914	115.914				DT-28	Andesite				137											61.31	0.63		16.89				4.76894	3.4	2.55	0.09		3.76	4.56	0.24
Yuan et al., 2006, Science in China: Series D Earth Sciences		Western Hill	Tiaojishan Fm.	39.9785	39.9785	115.914	115.914				DT-31	Basalt				137											51.57	1.1		17.54				7.93624	7.89	5.61	0.12		1.94	3.27	0.33
Yuan et al., 2006, Science in China: Series D Earth Sciences		Western Hill	Tiaojishan Fm.	39.9785	39.9785	115.914	115.914				DT-32	Basalt				137											51.15	1.28		17.48				8.12519	6.54	4.96	0.15		3.02	3.31	0.36
Yuan et al., 2006, Science in China: Series D Earth Sciences		Western Hill	Tiaojishan Fm.	39.9785	39.9785	115.914	115.914				DT-33	Andesite				137											58.14	1.11		16.63				6.55954	4.81	2.19	0.1		4.52	3.32	0.55
Yuan et al., 2006, Science in China: Series D Earth Sciences		Western Hill	Tiaojishan Fm.	39.9785	39.9785	115.914	115.914				DT-34	Andesite				137											56.34	0.87		18.51				6.44257	4.83	2.64	0.13		2.46	5.47	0.53
Yuan et al., 2006, Science in China: Series D Earth Sciences		Western Hill	Tiaojishan Fm.	39.9785	39.9785	115.914	115.914				DT-35	Andesite				137											57.35	0.82		17.91				6.2806	5.16	2.5	0.12		2.74	4.41	0.51
Yuan et al., 2006, Science in China: Series D Earth Sciences		Western Hill	Tiaojishan Fm.	39.9785	39.9785	115.914	115.914				DT-36	Andesite				137											55.3	1.01		16.45				7.02744	6.05	4.81	0.12		1.86	3.99	0.34
Yuan et al., 2006, Science in China: Series D Earth Sciences		Western Hill	Tiaojishan Fm.	39.9785	39.9785	115.914	115.914				DT-37	Dacite				137											66.15	0.48		16.77				3.39225	2.4	1.32	0.08		3.75	5.13	0.2
Yuan et al., 2006, Science in China: Series D Earth Sciences		Western Hill	Tiaojishan Fm.	39.9785	39.9785	115.914	115.914				DT-38	Andesite				137											58.18	0.77		17.91				5.90269	5.25	2.29	0.11		3.36	3.56	0.41
Yuan et al., 2006, Science in China: Series D Earth Sciences		Western Hill	Tiaojishan Fm.	39.9785	39.9785	115.914	115.914				DT-39	Andesite				137											58.03	0.79		18.18				6.04666	5.61	2.29	0.08		2.66	4.17	0.42
Yuan et al., 2006, Science in China: Series D Earth Sciences		Western Hill	Tiaojishan Fm.	39.9785	39.9785	115.914	115.914				DT-40	Andesite				137											55.24	1.21		17.82				7.24339	4.3	3.14	0.09		1.99	6.17	0.42
Yuan et al., 2006, Science in China: Series D Earth Sciences		Western Hill	Donglingtai Fm	40.0659	40.0659	115.715	115.715				YHC-02	Rhyolite				133.8											76.33	0.12		12.78				0.890802	0.25	0.15	0.06		5.11	2.88	0.02
Yuan et al., 2006, Science in China: Series D Earth Sciences		Western Hill	Donglingtai Fm	40.0659	40.0659	115.715	115.715				YHC-06	Dacite				133.8											65.53	0.7		14.75				4.65197	2.08	2.64	0.04		3.52	1.82	0.17
Yuan et al., 2006, Science in China: Series D Earth Sciences		Western Hill	Donglingtai Fm	40.0659	40.0659	115.715	115.715				YHC-08	Dacite				133.8											65.82	0.55		16.9				3.47323	1.72	1.2	0.12		3.42	5.59	0.22
Yuan et al., 2006, Science in China: Series D Earth Sciences		Western Hill	Donglingtai Fm	40.0659	40.0659	115.715	115.715				YHC-10	Rhyolite				133.8											78.83	0.1		12.45				0.863808	0.23	0.13	0.06		4.9	3.62	0.01
Yuan et al., 2006, Science in China: Series D Earth Sciences		Western Hill	Donglingtai Fm	40.0659	40.0659	115.715	115.715				YHC-11	Rhyolite				133.8											78.24	0.11		12.46				0.94479	0.16	0.16	0.06		4.66	3.39	0.01
Yuan et al., 2006, Science in China: Series D Earth Sciences		Western Hill	Donglingtai Fm	40.0659	40.0659	115.715	115.715				YHC-12	Rhyolite				133.8											76.91	0.23		13.14				1.3677	0.12	0.27	0.06		4.64	4.06	0.04
Yuan et al., 2006, Science in China: Series D Earth Sciences		Western Hill	Donglingtai Fm	40.0659	40.0659	115.715	115.715				YHC-13	Rhyolite				133.8											70.74	0.48		15.37				2.58243	0.34	0.56	0.04		4.86	5.09	0.09
Yuan et al., 2006, Science in China: Series D Earth Sciences		Western Hill	Donglingtai Fm	40.0659	40.0659	115.715	115.715				YHC-14	Dacite				133.8											64.65	0.83		15.63				4.64297	2.29	1.45	0.06		3.88	5.03	0.24
Yuan et al., 2006, Science in China: Series D Earth Sciences		Western Hill	Donglingtai Fm	40.0659	40.0659	115.715	115.715				YHC-15	Dacite				133.8											65.27	0.55		17.08				3.5812	1.49	1.16	0.08		3.31	6.27	0.24
Yuan et al., 2006, Science in China: Series D Earth Sciences		Western Hill	Donglingtai Fm	40.0659	40.0659	115.715	115.715				YHC-17	Dacite				133.8											65.48	0.56		17.07				3.6082	2.64	1.09	0.1		3.25	5.35	0.24
Yang et al., 2008, Journal of Petrology		Xiangshan pluton		40.1333	40.1333	119.417	119.417				F04-031	Alkali-Feldspar Granite				117											75.26	0.11		12.86				1.41269	0.23	0.08	0.02		5.46	3.79	0.02
Yang et al., 2008, Journal of Petrology		Xiangshan pluton		40.1333	40.1333	119.417	119.417				F04-032	Alkali-Feldspar Granite				117											74.54	0.15		12.95				1.45768	0.77	0.25	0.03		4.79	4.03	0.03
Yang et al., 2008, Journal of Petrology		Xiangshan pluton		40.1333	40.1333	119.417	119.417				F04-033	Alkali-Feldspar Granite				117											74.44	0.17		12.82				1.52966	0.77	0.26	0.04		4.56	4.16	0.04
Yang et al., 2008, Journal of Petrology		Xiangshan pluton		40.1333	40.1333	119.417	119.417				F04-034	Alkali-Feldspar Granite				117											75.24	0.15		12.8				1.40369	0.69	0.2	0.03		4.7	4.01	0.03
Yang et al., 2008, Journal of Petrology		Xiangshan pluton		40.1333	40.1333	119.417	119.417				F04-035	Alkali-Feldspar Granite				117											75.35	0.17		12.78				1.54766	0.78	0.25	0.03		4.46	4.15	0.04
Yang et al., 2008, Journal of Petrology		Xiangshan pluton		40.1333	40.1333	119.417	119.417				F04-036	Alkali Amphibole Granite				117
Yang et al., 2008, Journal of Petrology		Xiangshan pluton		40.1333	40.1333	119.417	119.417				F04-037	Alkali Amphibole Granite				117											76.52	0.08		11				2.44746	0.08	0.02	0.05		4.4	4.49	0.01
Yang et al., 2008, Journal of Petrology		Xiangshan pluton		40.1333	40.1333	119.417	119.417				F04-038	Alkali Amphibole Granite				117											76.58	0.08		11.47				2.19551	0.08	0.03	0.04		4.48	4.5	0.01
Yang et al., 2008, Journal of Petrology		Xiangshan pluton		40.1333	40.1333	119.417	119.417				F04-039	Alkali Amphibole Granite				117											77.1	0.07		10.82				2.19551	0.16	0.03	0.04		4.27	4.25	0.01
Yang et al., 2008, Journal of Petrology		Houshihushan pluton		40.0667	40.0667	119.7	119.7				F04-059	Alkali Amphibole Granite				118											75.24	0.13		12.2				1.97956	0.15	0.07	0.05		4.59	4.62	0.01
Yang et al., 2008, Journal of Petrology		Houshihushan pluton		40.0667	40.0667	119.7	119.7				F04-060	Alkali Amphibole Granite				118											75.08	0.13		12.5				1.93457	0.14	0.12	0.04		4.45	5.49	0.01
Yang et al., 2008, Journal of Petrology		Houshihushan pluton		40.0667	40.0667	119.7	119.7				F04-061	Alkali Amphibole Granite				118											74.56	0.14		12.49				1.95257	0.14	0.12	0.04		4.42	5.48	0.01
Yang et al., 2008, Journal of Petrology		Houshihushan pluton		40.0667	40.0667	119.7	119.7				F04-073	Alkali Amphibole Granite				118											76.24	0.13		11.8				2.05154	0.26	0.11	0.07		4.67	4.61	0.01
Yang et al., 2008, Journal of Petrology		Houshihushan pluton		40.0667	40.0667	119.7	119.7				F04-074	Alkali Amphibole Granite				118											76.11	0.14		11.83				2.07854	0.25	0.05	0.07		4.69	4.56	0.01
Yang et al., 2008, Journal of Petrology		Houshihushan pluton		40.0667	40.0667	119.7	119.7				F04-075	Alkali Amphibole Granite				118											76.01	0.12		12.02				1.96156	0.23	0.02	0.07		4.68	4.7	0.01
Yang et al., 2008, Journal of Petrology		Houshihushan pluton		40.0667	40.0667	119.7	119.7				F04-076	Alkali Amphibole Granite				118											76.14	0.13		11.54				2.19551	0.24	0.06	0.08		4.62	4.66	0.01
Yang et al., 2008, Journal of Petrology		Houshihushan pluton		40.0667	40.0667	119.7	119.7				F04-077	Alkali Amphibole Granite				118											76.17	0.13		11.52				2.19551	0.24	0.04	0.08		4.61	4.74	0.01
Yang et al., 2008, Journal of Petrology		Houshihushan pluton		40.0667	40.0667	119.7	119.7				F04-078	Alkali Amphibole Granite				118											75.75	0.13		11.54				2.11453	0.24	0.04	0.08		4.58	4.53	0.01
Yang et al., 2008, Journal of Petrology		Houshihushan pluton		40.0667	40.0667	119.7	119.7				F04-067	Syenite				120											64.89	0.71		16.03				3.91413	2.17	1	0.1		4.82	5.16	0.24
Yang et al., 2008, Journal of Petrology		Houshihushan pluton		40.0667	40.0667	119.7	119.7				F04-068	Syenite				120											65.59	0.69		15.82				3.88714	2.03	0.96	0.09		4.99	5.03	0.23
Yang et al., 2008, Journal of Petrology		Houshihushan pluton		40.0667	40.0667	119.7	119.7				F04-069	Syenite				120											63.07	0.88		15.9				4.64297	2.41	1.13	0.11		4.77	4.98	0.3
Yang et al., 2008, Journal of Petrology		Houshihushan pluton		40.0667	40.0667	119.7	119.7				F04-070	Syenite				120											64.84	0.77		16.07				4.21106	2.24	1.03	0.11		4.9	4.92	0.25
Yang et al., 2008, Journal of Petrology		Houshihushan pluton		40.0667	40.0667	119.7	119.7				F04-071	Syenite				120											64.05	0.78		16.18				4.25605	2.26	1.08	0.1		4.85	5.09	0.26
Yang et al., 2008, Journal of Petrology		Houshihushan pluton		40.0667	40.0667	119.7	119.7				F04-072	Syenite				120											64.26	0.83		16.02				4.40002	2.28	1.12	0.11		3.67	6.34	0.26
Yang et al., 2008, Journal of Petrology		Qiancengbei		40.7833	40.7833	117.533	117.533				F04-106	Alkali Amphibole Granite				129											71.45	0.3		13.58				3.00533	0.38	0.18	0.12		5.21	5.31	0.04
Yang et al., 2008, Journal of Petrology		Qiancengbei		40.7833	40.7833	117.533	117.533				F04-107	Alkali Amphibole Granite				129											71.09	0.3		14				2.92435	0.46	0.22	0.11		5.2	5.22	0.04
Yang et al., 2008, Journal of Petrology		Qiancengbei		40.7833	40.7833	117.533	117.533				F04-108	Alkali Amphibole Granite				129											72.32	0.27		12.54				3.36525	0.34	0.16	0.14		4.84	5.29	0.03
Yang et al., 2008, Journal of Petrology		Wulingshan		40.5833	40.5833	117.533	117.533				F04-110	Porphyritic Syenite				129											74.69	0.24		11.14				3.55421	0.3	0.49	0.14		4.38	2.99	0.01
Yang et al., 2008, Journal of Petrology		Wulingshan		40.5833	40.5833	117.533	117.533				F04-111	Porphyritic Syenite				129											63.93	0.44		17.87				2.88836	1.91	0.46	0.08		5.03	6.41	0.12
Yang et al., 2008, Journal of Petrology		Wulingshan		40.5833	40.5833	117.533	117.533				F04-112	Porphyritic Syenite				129											64.72	0.41		17.82				2.79838	1.88	0.39	0.07		5.12	6.09	0.11
Yang et al., 2008, Journal of Petrology		Wulingshan		40.5833	40.5833	117.533	117.533				FW04-114	Porphyritic Syenite				130											61.9	0.72		16.96				4.69696	2.91	0.83	0.19		3.94	6.57	0.26
Yang et al., 2008, Journal of Petrology		Wulingshan		40.5833	40.5833	117.533	117.533				FW04-115	Porphyritic Syenite				130											62.24	0.65		17.01				4.67896	2.72	0.79	0.2		3.94	6.63	0.24
Yang et al., 2008, Journal of Petrology		Wulingshan		40.5833	40.5833	117.533	117.533				FW04-109	Syenite				130											69.13	0.33		14.62				3.12231	0.51	0.16	0.07		5.01	5.32	0.04
Yang et al., 2008, Journal of Petrology		Wulingshan		40.5833	40.5833	117.533	117.533				FW04-113	Syenite				130											67.99	0.26		15.78				3.17629	0.63	0.12	0.1		5.77	5.84	0.02
Yang et al., 2008, Journal of Petrology		Wulingshan		40.5833	40.5833	117.533	117.533				FW04-116	Syenite				130											66.59	0.35		16.16				3.30227	0.84	0.2	0.12		5.59	6.04	0.04
Yang et al., 2008, Journal of Petrology		Wulingshan		40.5833	40.5833	117.533	117.533				FW04-117	Syenite				130											66.89	0.3		16.61				2.91535	0.82	0.21	0.1		5.64	6.24	0.04
Yang et al., 2008, Journal of Petrology		Houshihushan pluton		40.0667	40.0667	119.7	119.7				F04-057	Alkali Rhyolite				120											75.13	0.14		12.37				1.87158	0.09	0.06	0.06		4.76	4.28	0.02
Yang et al., 2008, Journal of Petrology		Houshihushan pluton		40.0667	40.0667	119.7	119.7				F04-062	Alkali Rhyolite				119											75.17	0.12		13.09				1.52966	0.22	0.04	<0.01		5.23	4.41	0.01
Yang et al., 2008, Journal of Petrology		Houshihushan pluton		40.0667	40.0667	119.7	119.7				F04-063	Alkali Rhyolite				119											74.79	0.12		13.36				1.48467	0.19	0.04	0.13		5.26	4.49	0.01
Yang et al., 2008, Journal of Petrology		Houshihushan pluton		40.0667	40.0667	119.7	119.7				F04-064	Alkali Trachyte				119											55.74	1.18		17.65				7.53133	5.94	3.12	0.14		2.99	4.45	0.43
Yang et al., 2008, Journal of Petrology		Houshihushan pluton		40.0667	40.0667	119.7	119.7				F04-065	Alkali Trachyte				119											63.96	0.9		16.76				3.94112	1.97	0.87	0.08		4.68	5.44	0.31
Yang et al., 2008, Journal of Petrology		Houshihushan pluton		40.0667	40.0667	119.7	119.7				F04-066	Alkali Trachyte				119											56.95	1.13		17.65				6.7305	5.35	1.87	0.12		4.26	4.39	0.38
Zhang et al., 2014, Lithos		Lüshan batholith		41.5833	41.5833	121.717	121.717				LB-1	Granite				161											73.65	0.05		14.08		0.61			1.14	0.36	0.02		4.22	5.02	0.01
Zhang et al., 2014, Lithos		Lüshan batholith		41.5833	41.5833	121.717	121.717				LB-2	Granite				161											75.51	0.07		14.6		0.81			1.21	0.02	0.02		3.22	4.57	0.01
Zhang et al., 2014, Lithos		Lüshan batholith		41.5833	41.5833	121.717	121.717				LB-3	Granite				161											74.45	0.08		14.99		0.91			1.28	0.06	0.04		2.89	4.93	0.02
Zhang et al., 2014, Lithos		Lüshan batholith		41.5833	41.5833	121.717	121.717				LB-4	Granite				161											75.61	0.09		15.26		0.89			1.27	0.02	0.03		2.65	4.49	0.03
Zhang et al., 2014, Lithos		Lüshan batholith		41.5833	41.5833	121.717	121.717				LB-5	Granite				161											74.86	0.07		14.65		0.8			1.28	0.09	0.03		3.03	4.82	0.02
Zhang et al., 2014, Lithos		Lüshan batholith		41.5833	41.5833	121.717	121.717				LB-15	Granite				161											73.09	0.1		14.34		1.16			0.96	0.12	0.02		4.17	5.54	0.03
Zhang et al., 2014, Lithos		Lüshan batholith		41.5833	41.5833	121.717	121.717				LB-16	Granite				161											70.11	0.24		16.02		2.9			2.18	0.51	0.04		2.26	4.61	0.08
Zhang et al., 2014, Lithos		Lüshan batholith		41.5833	41.5833	121.717	121.717				LB-17	Granite				161											72.31	0.18		15.29		1.61			2.2	0.22	0.03		2.87	4.87	0.06
Zhang et al., 2014, Lithos		Lüshan batholith		41.5833	41.5833	121.717	121.717				LB-18	Granite				161											70.33	0.36		16.31		2.1			1.8	0.5	0.04		3.23	4.34	0.06
Zhang et al., 2014, Lithos		Lüshan batholith		41.5833	41.5833	121.717	121.717				BZ09-4	Granite				161											73.76	0.09		15.04		1.04			1.47	0.18	0.03		2.98	5.12	0.03
Zhang et al., 2014, Lithos		Lüshan batholith		41.5833	41.5833	121.717	121.717				BZ09-6	Granite				161											73.66	0.09		15.09		1.03			1.46	0.19	0.04		3	5.11	0.03
Zhang et al., 2014, Lithos		Haitangshan batholith		42.0333	42.0333	121.892	121.892				FX12-24-1	Granodiorite				172											54.53	0.82		16.21		7.91			7.64	5.49	0.12		1.73	3.54	0.17
Zhang et al., 2014, Lithos		Haitangshan batholith		42.0333	42.0333	121.892	121.892				FX12-24-3	Diorite				172											59.96	0.87		16.96		6.67			4.83	2.32	0.11		2.48	4.5	0.25
Zhang et al., 2014, Lithos		Haitangshan batholith		42.0333	42.0333	121.892	121.892				FX12-24-4	Diorite				172											60.11	0.88		17.01		6.66			4.68	2.28	0.11		2.56	4.46	0.25
Zhang et al., 2014, Lithos		Haitangshan batholith		42.0333	42.0333	121.892	121.892				FX12-24-6	Diorite				172											59.79	0.88		16.98		6.68			4.55	2.36	0.11		2.56	4.46	0.25
Zhang et al., 2014, Lithos		Haitangshan batholith		42.0333	42.0333	121.892	121.892				HT09-01	Granodiorite				162											64.69	0.61		16		4.8			3.67	1.83	0.07		2.32	4.65	0.25
Zhang et al., 2014, Lithos		Haitangshan batholith		42.0333	42.0333	121.892	121.892				HT09-02	Granodiorite				162											65.98	0.52		15.79		4.15			3.08	1.63	0.06		3.78	4.06	0.19
Zhang et al., 2014, Lithos		Haitangshan batholith		42.0333	42.0333	121.892	121.892				HT09-03	Granodiorite				162											66	0.53		15.89		4.18			3.1	1.63	0.06		3.8	4.15	0.23
Zhang et al., 2014, Lithos		Haitangshan batholith		42.0333	42.0333	121.892	121.892				HT09-05	Granodiorite				162											66.8	0.49		15.65		3.95			3.22	1.52	0.06		3	4.52	0.21
Zhang et al., 2014, Lithos		Haitangshan batholith		42.0333	42.0333	121.892	121.892				HT09-06	Granodiorite				162											67.12	0.48		15.14		3.95			3.14	1.46	0.06		2.71	4.6	0.21
Zhang et al., 2014, Lithos		Haitangshan batholith		42.0333	42.0333	121.892	121.892				HT09-07	Granodiorite				162											63.71	0.68		16.53		5.28			3.97	1.92	0.07		1.92	5.09	0.28
Zhang et al., 2014, Lithos		Haitangshan batholith		42.0333	42.0333	121.892	121.892				HT09-08	Granodiorite				162											66.91	0.51		15.51		4			2.99	1.5	0.06		3.84	4.02	0.21
Zhang et al., 2014, Lithos		Haitangshan batholith		42.0333	42.0333	121.892	121.892				HT09-10	Granodiorite				162											68.14	0.44		15.43		3.46			2.85	1.28	0.06		3.51	4.28	0.18
Zhang et al., 2014, Lithos		Haitangshan batholith		42.0333	42.0333	121.892	121.892				HS09-3/1	Gabbro				164											49.67	1.13		13.62		9.47			7.82	9.98	0.16		2.42	2.6	0.79
Zhang et al., 2014, Lithos		Haitangshan batholith		42.0333	42.0333	121.892	121.892				HS09-3/2	Gabbro				164											50.16	1.11		14.96		9.45			7.3	8.49	0.15		2.46	3.14	0.78
Zhang et al., 2014, Lithos		Haitangshan batholith		42.0333	42.0333	121.892	121.892				HS09-01	Granite				164											74.32	0.17		14.03		1.14			1.21	0.34	0.04		4.8	3.64	0.04
Zhang et al., 2014, Lithos		Haitangshan batholith		42.0333	42.0333	121.892	121.892				HS09-02-1	Granite				168											76.65	0.09		13.15		0.68			0.63	0.09	0.05		4.72	3.85	0.01
Zhang et al., 2014, Lithos		Haitangshan batholith		42.0333	42.0333	121.892	121.892				HS09-2/2	Granite				168											75.88	0.09		13.42		0.63			0.65	0.07	0.04		4.8	4.12	0.01
Zhang et al., 2014, Lithos		Haitangshan batholith		42.0333	42.0333	121.892	121.892				HS09-11	Granite				168											71.48	0.25		14.52		2.4			1.68	0.53	0.07		3.76	4.51	0.12
Zhang et al., 2014, Lithos		Haitangshan batholith		42.0333	42.0333	121.892	121.892				HS09-4	Granite				164											76.28	0.07		13.17		0.59			0.71	0.08	0.03		4.32	4.42	0.01
Zhang et al., 2014, Lithos		Haitangshan batholith		42.0333	42.0333	121.892	121.892				HS09-5	Granite				164											76.37	0.06		13.32		0.52			0.57	0.07	0.03		4.53	4.35	0.01
Zhang et al., 2014, Lithos		Haitangshan batholith		42.0333	42.0333	121.892	121.892				HS09-17	Granite				164											75.98	0.1		13.46		0.74			0.88	0.15	0.06		3.93	4.37	0.03
Zhang et al., 2014, Lithos		Haitangshan batholith		42.0333	42.0333	121.892	121.892				HS09-18	Granite				164											76.09	0.12		13.41		0.94			0.88	0.21	0.08		3.63	4.38	0.03
Zhang et al., 2014, Lithos		Haitangshan batholith		42.0333	42.0333	121.892	121.892				HS09-19	Granite				164											74.84	0.14		13.85		1.1			0.88	0.24	0.09		3.95	4.48	0.03
Zhang et al., 2014, Lithos		Haitangshan batholith		42.0333	42.0333	121.892	121.892				FX04-2	Granite				158											71.6	0.23		15.37		1.77			1.87	0.32	0.05		3.24	4.59	0.09
Zhang et al., 2014, Lithos		Haitangshan batholith		42.0333	42.0333	121.892	121.892				FX04-3	Granite				158											70.5	0.23		15.15		1.86			1.25	0.71	0.04		4.04	4.16	0.09
Zhang et al., 2014, Lithos		Haitangshan batholith		42.0333	42.0333	121.892	121.892				FX04-4	Granite				158											70.96	0.39		15.39		3.05			2.68	0.36	0.05		3.05	4.24	0.17
Zhang et al., 2014, Lithos		Haitangshan batholith		42.0333	42.0333	121.892	121.892				FX04-5	Granodiorite				158											66.5	0.49		15.06		4.09			3.03	1.45	0.06		3.7	4.43	0.16
Zhang et al., 2014, Lithos		Haitangshan batholith		42.0333	42.0333	121.892	121.892				FX04-16	Granite				158											71.62	0.23		14.95		2.31			1.79	0.77	0.06		3.12	4.11	0.11
Zhang et al., 2014, Lithos		Haitangshan batholith		42.0333	42.0333	121.892	121.892				FX04-41	Granite				158											73.12	0.3		14.5		1.9			1.87	0.79	0.07		3.15	3.76	0.08
Zhang et al., 2014, Lithos		Haitangshan batholith		42.0333	42.0333	121.892	121.892				FX04-44	Granite				158											72.67	0.2		14.68		1.74			1.69	0.4	0.04		4.05	4.22	0.09
Yang and Li, 2008, Lithos		Beipiao	Lanqi Fm.	41.8414	41.8414	120.767	120.767				HFG-13	Basalt				166											53.24	1.09		18.28		8.83			6.86	3.16	0.14		1.74	3.99	0.33
Yang and Li, 2008, Lithos		Beipiao	Lanqi Fm.	41.8414	41.8414	120.767	120.767				HFG-15	Basalt				166											52.37	1.02		16.5		8.47			8.19	1.61	0.19		2.69	3.98	0.26
Yang and Li, 2008, Lithos		Beipiao	Lanqi Fm.	41.8414	41.8414	120.767	120.767				LQ-6	Basaltic Andesite				157											54.9	1.16		18.51		5.88			4.42	3.9	0.1		2.25	4.69	0.35
Yang and Li, 2008, Lithos		Beipiao	Lanqi Fm.	41.8414	41.8414	120.767	120.767				LQ-9	Rhyolite				157											65.26	0.5		16.27		4.73			1.67	0.24	0.06		4.96	4.55	0.19
Yang and Li, 2008, Lithos		Beipiao	Lanqi Fm.	41.8414	41.8414	120.767	120.767				LQ-10	Rhyolite				157											65.86	0.5		16.27		4.29			1.75	0.24	0.06		4.96	4.62	0.18
Yang and Li, 2008, Lithos		Beipiao	Lanqi Fm.	41.8414	41.8414	120.767	120.767				LQ-11	Rhyolite				157											64.4	0.57		16.76		4.66			1.54	0.42	0.03		4.88	4.62	0.2
Yang and Li, 2008, Lithos		Beipiao	Lanqi Fm.	41.8414	41.8414	120.767	120.767				LQ-15	Andesite				157											56.24	1.37		17		7.45			4.84	1.83	0.13		3.05	4.45	0.64
Yang and Li, 2008, Lithos		Beipiao	Lanqi Fm.	41.8414	41.8414	120.767	120.767				LQ-16	Andesite				157											57.04	1.38		17.06		7.27			4.88	1.38	0.13		3.32	4.45	0.64
Yang and Li, 2008, Lithos		Beipiao	Lanqi Fm.	41.8414	41.8414	120.767	120.767				LQ-17	Andesite				157											55.92	1.4		17.05		6.9			5.17	2.3	0.17		3.08	4.4	0.69
Yang and Li, 2008, Lithos		Beipiao	Lanqi Fm.	41.8414	41.8414	120.767	120.767				LQ-18	Andesite				157											56.46	1.44		16.95		7.81			4.79	1.5	0.08		3.3	4.62	0.71
Yang and Li, 2008, Lithos		Beipiao	Lanqi Fm.	41.8414	41.8414	120.767	120.767				LQ-19	Andesite				157											56.16	1.35		16.93		6.93			5.21	2.34	0.11		3.12	4.29	0.65
Yang and Li, 2008, Lithos		Beipiao	Lanqi Fm.	41.8414	41.8414	120.767	120.767				LQ-20	Andesite				157											57.96	1.44		17.02		7.07			4.17	1.14	0.09		3.5	4.55	0.66
Yang and Li, 2008, Lithos		Beipiao	Lanqi Fm.	41.8414	41.8414	120.767	120.767				LQ-21	Andesite				157											56.86	1.42		17.41		7.93			4.38	0.78	0.07		3.62	4.55	0.67
Yang and Li, 2008, Lithos		Beipiao	Lanqi Fm.	41.8414	41.8414	120.767	120.767				LQ-22	Andesite				157											56.92	1.43		17.26		7.69			4.54	1.59	0.09		3.32	4.35	0.68
Yang and Li, 2008, Lithos		Beipiao	Lanqi Fm.	41.8414	41.8414	120.767	120.767				LQ-27	Rhyolite				157											65.62	0.47		16.59		3.9			2.17	0.33	0.09		3.88	5.1	0.15
Yang and Li, 2008, Lithos		Beipiao	Lanqi Fm.	41.8414	41.8414	120.767	120.767				LQ-28	Rhyolite				157											66.06	0.47		16.57		3.24			2.08	0.69	0.12		3.7	5	0.17
Yang and Li, 2008, Lithos		Beipiao	Lanqi Fm.	41.8414	41.8414	120.767	120.767				LQ-29	Rhyolite				157											66.14	0.48		16.44		3.46			2.29	0.69	0.08		3.62	5.2	0.17
Yang and Li, 2008, Lithos		Beipiao	Yixian Fm.	41.6147	41.6147	120.816	120.816				HBJ4-1	basalt				123											54.83	0.86		15.22		7.88			6.73	6.45	0.1		1.65	3.79	0.34
Yang and Li, 2008, Lithos		Beipiao	Yixian Fm.	41.6147	41.6147	120.816	120.816				HBJ4-2	basalt				123											53.16	0.9		15.71		8.11			7.16	6.23	0.11		1.92	4.18	0.36
Yang and Li, 2008, Lithos		Beipiao	Yixian Fm.	41.6147	41.6147	120.816	120.816				HBJ4-3	basalt				123											52.84	0.89		15.6		8.33			7.17	7.03	0.09		1.91	4.13	0.36
Yang and Li, 2008, Lithos		Beipiao	Yixian Fm.	41.5813	41.5813	120.773	120.773				SHT-14	Basaltic andesite				123											55.78	1.1		15.47		7.9			5.92	5.21	0.11		2.4	4.06	0.55
Yang and Li, 2008, Lithos		Beipiao	Yixian Fm.	41.5813	41.5813	120.773	120.773				SHT-3	Basaltic andesite				123											56.67	0.74		15.04		6.26			5.36	5.92	0.09		2.66	4.26	0.46
Yang and Li, 2008, Lithos			Yixian Fm.	41.7094	41.7094	121.32	121.32				ZCZ1-1	Andesite				123											60.19	0.77		15.17		5.66			4.14	3.3	0.09		2.68	3.52	0.22
Yang and Li, 2008, Lithos			Yixian Fm.	41.7094	41.7094	121.32	121.32				ZCZ1-2	Andesite				123											59.84	0.76		14.96		5.17			4.24	3.36	0.08		3.19	3.71	0.23
Yang and Li, 2008, Lithos			Yixian Fm.	41.7094	41.7094	121.32	121.32				ZCZ1-3	Andesite				123											61.67	0.74		14.51		5.25			3.82	3.77	0.07		3.09	3.65	0.21
Yang and Li, 2008, Lithos			Yixian Fm.	41.7094	41.7094	121.32	121.32				ZCZ1-4	Andesite				123											62.17	0.74		14.53		5.21			3.83	3.58	0.07		3.1	3.63	0.23
Yang and Li, 2008, Lithos		Beipiao	Zhanglaogongtun Fm.	42.2786	42.2786	121.904	121.904				JG-1	Basalt				106											45.18	2.97		14.98		11.79			10.39	8.4	0.17		1.37	2.98	0.63
Yang and Li, 2008, Lithos		Beipiao	Zhanglaogongtun Fm.	42.2786	42.2786	121.904	121.904				JG-2	Basalt				106											44.63	2.96		14.94		11.64			10.27	8.52	0.17		1.37	3.06	0.63
Yang and Li, 2008, Lithos		Beipiao	Zhanglaogongtun Fm.	42.2786	42.2786	121.904	121.904				JG-3	Basalt				106											45.19	2.97		15		11.77			10.38	8.49	0.17		1.37	3	0.61
Yang and Li, 2008, Lithos		Beipiao	Zhanglaogongtun Fm.	42.2786	42.2786	121.904	121.904				JG-4	Basalt				106											43.89	2.98		15.2		11.85			10.46	8.86	0.18		1.46	3.33	0.65
Yang and Li, 2008, Lithos		Beipiao	Zhanglaogongtun Fm.	42.2786	42.2786	121.904	121.904				JG-5	Basalt				106											45.75	2.96		15.06		11.63			10.22	8.36	0.17		1.4	3.04	0.62
Yang and Li, 2008, Lithos		Beipiao	Zhanglaogongtun Fm.	42.3083	42.3083	121.894	121.894				WHC-1	Basalt				106											43.57	2.99		15.14		12.32			9.76	8.43	0.18		0.8	3.91	0.73
Yang and Li, 2008, Lithos		Beipiao	Zhanglaogongtun Fm.	42.3083	42.3083	121.894	121.894				WHC-2	Basalt				106											42.71	2.96		14.88		12.22			9.67	8.39	0.17		0.7	3.76	0.71
Yang and Li, 2008, Lithos		Beipiao	Zhanglaogongtun Fm.	42.3083	42.3083	121.894	121.894				WHC-3	Basalt				106											43.37	2.97		15.12		12.18			9.78	8.54	0.18		0.74	3.95	0.71
Yang and Li, 2008, Lithos		Beipiao	Zhanglaogongtun Fm.	42.3083	42.3083	121.894	121.894				WHC-4	Basalt				106											43.31	2.94		14.99		11.9			9.5	8.32	0.17		0.76	3.94	0.71
Zhang et al., 2014, ESR		Western Hill	Tiaojishan Fm.	39.7797	39.7797	115.508	115.508				10120-1	Andesite				157											58.05	0.71		17.76				5.8577	6.24	2.24	0.08		2.25	3.53	0.42
Zhang et al., 2014, ESR		Western Hill	Tiaojishan Fm.	39.7822	39.7822	115.53	115.53				10121-1	Andesite				157											57.57	0.98		16.87				5.75872	5.09	3.52	0.07		0.27	6.02	0.42
Zhang et al., 2014, ESR		Lingying, Fengning	Tiaojishan Fm.	41.025	41.025	117.078	117.078				D078-2	Dacite				156											73.62	0.32		11.15				3.74317	0.27	0.77	0.04		5.09	1.86	0.04
Zhang et al., 2014, ESR		Shouwangfen, Xinglong	Tiaojishan Fm.	40.5563	40.5563	117.749	117.749				08005-4	Andesite				161											70.33	0.36		14.51				2.2585	1.85	0.58	0.05		4.55	2.34	0.14
Zhang et al., 2014, ESR		Zhoujiawopu, SE Chifeng	Tiaojishan Fm.	42.1148	42.1148	119.116	119.116				07D002-1	Quartz Trachyandesite				169											67.71	0.53		15.55		1.66	1.63	3.12231	1.84	0.86	0.09		4.81	4.31	0.14
Zhang et al., 2014, ESR		Zhoujiawopu, SE Chifeng	Tiaojishan Fm.	42.0903	42.0903	119.057	119.057				07D006-1	Quartz Trachyandesite				169											67.64	0.54		15.6		2	1.11	2.90635	0.36	0.72	0.06		4.66	5.04	0.15
Zhang et al., 2014, ESR		Zhoujiawopu, SE Chifeng	Tiaojishan Fm.	42.0902	42.0902	119.054	119.054				07D007-1	Quartz Trachyandesite				169											68.27	0.55		16.71		1.93	1.45	3.18529	0.36	0.77	0.1		4.25	4.74	0.15
Zhang et al., 2014, ESR		Zhoujiawopu, SE Chifeng	Tiaojishan Fm.	42.0875	42.0875	119.066	119.066				07D008-1	Quartz Trachyandesite				169											66.12	0.59		15.9		2.33	1.2	3.29327	2.01	0.95	0.09		4.36	4.95	0.16
Zhang et al., 2014, ESR		Nantaxiang, East Chifeng	Tiaojishan Fm.	42.302	42.302	120.277	120.277				09064-1	Rhyolite				164											73.98	0.27		14.13				1.31371	0.24	0.21	0.05		3.84	3.92	0.06
Zhang et al., 2014, ESR		East Laohahe, East Chifeng	Tiaojishan Fm.	42.5648	42.5648	119.653	119.653				09075-1	Rhyolitic Tuff				163											77.97	0.16		11.17				0.845812	0.38	0.08	0.01		5.07	2.22	0.18
Zhang et al., 2014, ESR		Peijiadian, East Chifeng	Tiaojishan Fm.	42.3012	42.3012	120.273	120.273				08170-1	Rhyolitic Tuff				162											70.62	0.46		16.58				1.85359	0.21	0.5	0.06		4.73	1.66	0.08
Zhang et al., 2014, ESR		Peijiadian, East Chifeng	Tiaojishan Fm.	42.3012	42.3012	120.273	120.273				08170-2	Rhyolitic Tuff				162											74.42	0.23		13.95				1.51166	0.14	0.31	0.07		6.72	0.61	0.05
Zhang et al., 2014, ESR		Siganding, Miyun		40.4762	40.4762	117.121	117.121				SGD-1	Quartz Monzodiorite				160											62.93	0.75		16.77				3.93213	3.31	1.78	0.06		4.57	4.46	0.24
Zhang et al., 2014, ESR		Siganding, Miyun		40.4687	40.4687	117.116	117.116				SGD-3	Quartz Monzodiorite				160											62.83	0.65		17.8				3.43724	3.08	1.62	0.06		4.33	4.83	0.23
Zhang et al., 2014, ESR		Qianzhangzi, Pingquan									HPQ020817	Diorite				166											54.29	1.4		15.9				7.1894	7.92	3.15	0.07		2.95	3.79	0.44
Zhang et al., 2014, ESR		Chengde county		40.744	40.744	118.146	118.146				08008-1	Dioritic Porphyrite				159											68.87	0.43		15.59				2.35748	0.61	0.65	0.06		4.57	4.58	0.12
Zhang et al., 2014, ESR		Nianziyu, Kuancheng		40.4345	40.4345	118.518	118.518				09018-1	Diorite				165											45.63	1.49		18.26				11.2925	10.07	5.12	0.13		0.9	3.2	0.8
Zhang et al., 2014, ESR		Zhoujiawopu, SE Chifeng		42.099	42.099	119.126	119.126				07D010-1	Quartz Monzodiorite				159											54.84	1.16		16.75				7.78327	6.63	3.4	0.12		2.9	3.11	0.21
Zhang et al., 2014, ESR		Jianchang, NWChifeng		42.5022	42.5022	118.788	118.788				07D046-1	Dioritic Porphyrite				171											53.46	1.56		16.18		3.91	4.67	8.18818	6.63	3.52	0.14		2.26	3.8	0.7
Zhang et al., 2014, ESR		Xingzhangzi, Lingyuan									LLX020811	Quartz Porphyry				165											74.38	0.06		13.83				0.296934	0.39	0.13	0.04		5.89	3.58	0.01
Zhang et al., 2014, ESR		Daheishan, Beipiao		42.0207	42.0207	120.48	120.48				09061-1	Quartz Monzonite				164											66.13	0.58		16.23				3.35625	2.46	1	0.08		3.89	4.71	0.19
Zhang et al., 2014, ESR				42.5607	42.5607	118.464	118.464				07D044-1	Quartz syenite porphyry				138											71.22	0.33		14.78				1.52966	0.58	0.23	0.06		5.41	5.13	0.02
Zhang et al., 2014, ESR				41.2122	41.2122	119.652	119.652				09043-1	Dioritic porphyrite				124											65.06	0.58		16.15				3.65319	2.58	1.53	0.05		3.47	4.17	0.23
Zhang et al., 2014, ESR				40.5982	40.5982	117.893	117.893				10018-1	Quartz diorite				133											53.56	1.3		16.12				7.24339	6.33	5.65	0.1		2.32	4.57	0.72
Zhang et al., 2014, ESR				41.0178	41.0178	116.632	116.632				10096-1	Granodiorite				138											68.52	0.4		15.41				2.78938	2.55	1.09	0.06		3.6	4.33	0.15
Zhang et al., 2014, ESR				40.0805	40.0805	115.444	115.444				10107-1	Granite				139											70.67	0.36		14.99				2.14152	1.55	0.72	0.06		3.75	4.83	0.12
Zhang et al., 2014, ESR				40.035	40.035	115.413	115.413				10109-1	Diorite				139											63.38	0.76		15.63				4.69696	3.74	2.12	0.09		3.56	4.19	0.26
Zhang et al., 2014, ESR				40.035	40.035	115.413	115.413				10109-2	Mafic microgranular enclave				139											59.53	0.97		15.91				5.87569	4.79	3.23	0.12		3.32	4.25	0.38
Zhang et al., 2014, ESR				39.9887	39.9887	115.428	115.428				10110-1	Diorite				139											64.1	0.76		15.96				4.31004	3.35	1.86	0.1		3.73	4.51	0.27
Zhang et al., 2014, ESR				40.035	40.035	115.413	115.413				10110-2	Mafic microgranular enclave				139											57.45	1		15.79				6.55054	5.36	4.29	0.19		3.01	4.34	0.35
Zhang et al., 2014, ESR				40.5575	40.5575	117.749	117.749				08005-1	Andesite porphyrite				127											62.27	0.77		14.7				3.77016	3.2	1.49	0.06		4.05	3.98	0.48
Ma et al., 2015, EPSL		Shangzhuangtuo, Shanhaiguan	Lanqi Fm.	40.1	40.1	119.7	119.7				SZT-1	Andesite	153	166		160											58.04	0.65		18.58				4.9399	3.36	2.19	0.06		4.18	4.89	0.38
Ma et al., 2015, EPSL		Shangzhuangtuo, Shanhaiguan	Lanqi Fm.	40.1	40.1	119.7	119.7				SZT-4-1	Andesite	153	166		160											55.95	0.81		16.12				6.84748	5.95	4.17	0.1		2.51	3.87	0.37
Ma et al., 2015, EPSL		Shangzhuangtuo, Shanhaiguan	Lanqi Fm.	40.1	40.1	119.7	119.7				SZT-5-1	Andesite	153	166		160											55.48	0.82		16.69				6.89247	5.44	4.38	0.12		2.39	4.48	0.39
Ma et al., 2015, EPSL		Shangzhuangtuo, Shanhaiguan	Lanqi Fm.	40.1	40.1	119.7	119.7				SZT-6-1	Andesite	153	166		160											55.64	0.78		17.56				6.27161	6.03	3.26	0.08		2.56	4.15	0.4
Ma et al., 2015, EPSL		Shangzhuangtuo, Shanhaiguan	Lanqi Fm.	40.1	40.1	119.7	119.7				SZT-2	Andesite	153	166		160											55.28	0.81		16.79				6.95545	4.66	4.36	0.1		2.39	5.06	0.39
Ma et al., 2015, EPSL		Shangzhuangtuo, Shanhaiguan	Lanqi Fm.	40.1	40.1	119.7	119.7				SZT-4-2	Andesite	153	166		160											55.84	0.81		15.93				6.96445	5.94	4.26	0.1		2.48	3.84	0.37
Ma et al., 2015, EPSL		Shangzhuangtuo, Shanhaiguan	Lanqi Fm.	40.1	40.1	119.7	119.7				SZT-6-2	Andesite	153	166		160											55.34	0.78		17.51				6.2806	6.03	3.28	0.08		2.53	4.15	0.4
Ma et al., 2015, EPSL		Beipiao	Haifanggou Fm.	41.2	41.2	120.5	120.5				09CLH-02	Andesite				173											57.81	1		17.7				6.96445	3.97	1.21	0.09		2.77	5.12	0.41
Ma et al., 2015, EPSL		Beipiao	Haifanggou Fm.	41.2	41.2	120.5	120.5				09CLH-07	Dacite				173											66.8	0.59		14.84				4.57998	3.02	0.62	0.04		3.09	3.9	0.25
Ma et al., 2015, EPSL		Beipiao	Haifanggou Fm.	41.2	41.2	120.5	120.5				09CLH-18	Andesite				173											58.47	0.98		16.95				5.73173	4.42	2.05	0.05		3.02	4.36	0.39
Ma et al., 2015, EPSL		Beipiao	Haifanggou Fm.	41.2	41.2	120.5	120.5				09CLH-19	Andesite				173											59.2	0.98		17.13				5.79471	4.52	2.11	0.07		3.03	4.4	0.38
Ma et al., 2015, EPSL		Beipiao	Haifanggou Fm.	41.2	41.2	120.5	120.5				09CLH-03	Dacite				173											64.93	0.75		16.12				4.0401	2.27	0.67	0.05		3.56	4.65	0.27
Ma et al., 2015, EPSL			Haifanggou Fm.	41.2	41.2	120.5	120.5				09CLH-10	Dacite				173											61.98	0.69		16.35				4.57098	4.06	1.74	0.05		2.91	4.28	0.28
Ma et al., 2015, EPSL			Haifanggou Fm.	41.2	41.2	120.5	120.5				09CLH-20	Andesite				173											58.42	0.99		16.86				5.61475	4.09	2.1	0.05		3.03	4.41	0.38
Ma et al., 2015, EPSL			Haifanggou Fm.	41.2	41.2	120.5	120.5				09CLH-06	Dacite				173											60.3	0.69		17.01				5.05688	3.48	2.3	0.03		2.48	3.54	0.27
Ma et al., 2015, EPSL		Lingyuan	Lanqi Fm.	41.2	41.2	120.5	120.5				JC007	Dacite	153	166		160											61.66	0.71		15.88				5.15585	3.49	1.71	0.07		3.97	4.14	0.36
Ma et al., 2015, EPSL		Beipiao	Lanqi Fm.	41.8	41.8	121	121				BPC-13	Dacite	153	166		160											61.08	0.73		16.34				5.15585	4.38	2.35	0.05		2.93	3.76	0.24
Ma et al., 2015, EPSL		Beipiao	Lanqi Fm.	41.8	41.8	121	121				BPC-12	Dacite	153	166		160											66.92	0.51		17.42				2.16852	2.74	0.45	0.01		3.54	4.3	0.28
Ma et al., 2015, EPSL		Beipiao	Lanqi Fm.	41.8	41.8	121	121				BPC-7	Dacite	153	166		160											65.2	0.55		15.18				3.53621	3.07	1.96	0.06		3.38	4.46	0.28
Ma et al., 2015, EPSL		Beipiao	Lanqi Fm.	41.8	41.8	121	121				BPC-9	Rhyolite	153	166		160											74.06	0.42		13.04				1.58365	0.73	0.65	0.03		6.3	2.29	0.1
Ma et al., 2015, EPSL		Lingyuan	Lanqi Fm.	40.85	40.85	119.8	119.8				LY006	Dacite	153	166		160											60.9	0.95		16.3				4.42702	4.11	1.12	0.11		3.78	3.76	0.4
Ma et al., 2015, EPSL		Beipiao	Lanqi Fm.	41.8	41.8	121	121				BPC-4	Andesite	153	166		160											55.66	0.83		17.53				5.70473	5.55	1.01	0.07		2.13	4.4	0.4
Ma et al., 2015, EPSL		Beipiao	Lanqi Fm.	41.8	41.8	121	121				BPC-6	Andesite	153	166		160											58.95	0.58		17.41				5.11086	4.76	1.55	0.11		2.29	4.44	0.39
Ma et al., 2015, EPSL		Beipiao	Lanqi Fm.	41.8	41.8	121	121				BPC-16	Andesite	153	166		160											55.33	0.78		18.35				6.01966	5.81	1.77	0.13		1.99	4.29	0.34
Ma et al., 2015, EPSL		Beipiao	Lanqi Fm.	41.8	41.8	121	121				BPC-14	Andesite	153	166		160											60.23	0.69		16.12				5.02988	5.77	0.84	0.09		3.29	3.41	0.24
Ma et al., 2015, EPSL		Beipiao	Lanqi Fm.	41.8	41.8	121	121				BPC-11	Dacite	153	166		160											62.34	0.65		16.22				5.53377	1.31	0.73	0.05		4.28	2.64	0.29
Wu et al., 2004, Acta Petrologica Et Mineralogica			Haifanggou Fm.	41.0863	41.0863	120.639	120.639				L1-1(1)	Trachy andensite				173											57.95	0.98		17.99		7.86	0.46	7.53243	2.18	1.97	0.11		3.47	5.98	0.4
Wu et al., 2004, Acta Petrologica Et Mineralogica			Haifanggou Fm.	41.0863	41.0863	120.639	120.639				L1-3(1)	Trachy andensite				173											59.85	0.94		17.15		5.05	1.24	5.78399	4.65	2.49	0.1		2.61	4.28	0.41
Wu et al., 2004, Acta Petrologica Et Mineralogica			Haifanggou Fm.	41.0863	41.0863	120.639	120.639				L1-3(4)	Andensite				173											61.7	1		15.32		6.28	1.08	6.73074	5.15	2.61	0.09		2.39	3.22	0.35
Wu et al., 2004, Acta Petrologica Et Mineralogica			Haifanggou Fm.	41.0863	41.0863	120.639	120.639				L1-3(5)	Trachy andensite				173											56.83	1.22		17.35		5.86	2.21	7.48283	5.78	2.74	0.1		1.47	5.07	0.42
Wu et al., 2004, Acta Petrologica Et Mineralogica			Haifanggou Fm.	41.0863	41.0863	120.639	120.639				L1-4(1)	Trachy andensite				173											56.9	0.9		18.86		5.41	1.28	6.14792	5.96	0.82	0.15		2.14	4.29	0.37
Wu et al., 2004, Acta Petrologica Et Mineralogica			Haifanggou Fm.	41.0863	41.0863	120.639	120.639				L1-5(1)	Trachy andensite				173											63.25	0.62		15.98		5.12	0.71	5.31698	2.61	1.54	0.08		3.05	5.25	0.31
Wu et al., 2004, Acta Petrologica Et Mineralogica			Haifanggou Fm.	41.0863	41.0863	120.639	120.639				L1-5(3)	Dacite				173											62.87	0.67		15.55		4.24	1.81	5.62515	4.44	2.59	0.12		2.65	3.85	0.33
Wu et al., 2004, Acta Petrologica Et Mineralogica			Haifanggou Fm.	41.0863	41.0863	120.639	120.639				L1-6(1)	Trachy andensite				173											55.91	0.86		17.81		4.91	2.69	7.10802	5.48	3.57	0.11		2.05	4.3	0.42
Wu et al., 2004, Acta Petrologica Et Mineralogica			Haifanggou Fm.	41.0863	41.0863	120.639	120.639				L1-6(2)	Trachy andensite				173											55.99	0.84		17.74		4.81	2.69	7.01804	5.4	3.55	0.12		2.11	4.35	0.42
Li et al., 2001, Acta Petrologica Sinica			Lanqi Fm.	41.966	41.966	121.438	121.438				B072-1					160											65.83	0.48		16.87				3.54521	2.93	0.81	0.04		3.14	4.76	0.2
Li et al., 2001, Acta Petrologica Sinica			Lanqi Fm.	41.966	41.966	121.438	121.438				B072-2					160											67.42	0.5		16.24				3.54521	2.84	0.27	0.03		2.91	4.94	0.22
Li et al., 2001, Acta Petrologica Sinica			Lanqi Fm.	41.966	41.966	121.438	121.438				B072-3					160											68.95	0.56		14.25				4.52599	2.75	0.12	0.04		2.77	3.37	0.21
Li et al., 2001, Acta Petrologica Sinica			Lanqi Fm.	41.966	41.966	121.438	121.438				B073-1					160											63.99	0.72		16.73				5.47978	3.13	0.41	0.03		2.61	3.73	0.27
Li et al., 2001, Acta Petrologica Sinica			Lanqi Fm.	41.966	41.966	121.438	121.438				B074-3					160											71.69	0.4		14.34				3.17629	2.16	0.11	0.01		2.82	3.7	0.17
Li et al., 2001, Acta Petrologica Sinica			Lanqi Fm.	41.966	41.966	121.438	121.438				B075-1					160											63.6	0.56		18.07				4.0311	3.92	0.26	0.01		2.8	4.87	0.36
Li et al., 2001, Acta Petrologica Sinica			Lanqi Fm.	41.966	41.966	121.438	121.438				B075-2					160											62.27	0.58		17.31				4.31004	4.43	1.33	0.05		2.33	4.75	0.38
Li et al., 2001, Acta Petrologica Sinica			Lanqi Fm.	41.966	41.966	121.438	121.438				B075-3					160											60.86	0.69		18.58				6.3076	3.69	0.32	0.04		2.74	3.69	0.24
Wang et al., 2006, Science in China Series D - Earth Sciences			Yixian Fm.	41.6021	41.6021	120.782	120.782				SHT-5	High-Mg andesites				125											57.27	0.76		14.69				5.76772	5.36	6.18	0.08		2.7	4.19	0.48
Wang et al., 2006, Science in China Series D - Earth Sciences			Yixian Fm.	41.6021	41.6021	120.782	120.782				SHT-8	High-Mg andesites				125											57.39	0.76		14.74				5.91169	5.25	6.42	0.08		2.63	4.12	0.47
Wang et al., 2006, Science in China Series D - Earth Sciences			Yixian Fm.	41.6021	41.6021	120.782	120.782				SHT-10	High-Mg andesites				125											58.1	0.76		14.97				5.8577	5.31	5.81	0.07		2.74	4.16	0.48
Wang et al., 2006, Science in China Series D - Earth Sciences			Yixian Fm.	41.6021	41.6021	120.782	120.782				SHT-55	High-Mg andesites				125											57.36	0.86		15.25				6.04666	5.82	6.01	0.12		1.76	3.78	0.28
Wang et al., 2006, Science in China Series D - Earth Sciences			Yixian Fm.	41.6021	41.6021	120.782	120.782				SHT-56	High-Mg andesites				125											56.72	0.87		15.14				6.24461	5.99	6.1	0.09		2.03	3.51	0.26
Wang et al., 2006, Science in China Series D - Earth Sciences			Yixian Fm.	41.6004	41.6004	120.783	120.783				SHT-59	High-Mg andesites				125											57.16	0.75		14.79				5.8307	5.3	6.33	0.08		2.69	4.06	0.48
Wang et al., 2006, Science in China Series D - Earth Sciences			Yixian Fm.	41.5999	41.5999	120.783	120.783				SHT-60	High-Mg andesites				125											57.29	0.78		15.02				5.74072	5.83	4.84	0.09		2.69	4.14	0.56
Wang et al., 2006, Science in China Series D - Earth Sciences			Yixian Fm.	41.5994	41.5994	120.783	120.783				SHT-61	High-Mg andesites				125											57.02	0.76		14.83				5.79471	5.52	6.15	0.08		2.71	4.1	0.52
Wang et al., 2006, Science in China Series D - Earth Sciences			Yixian Fm.	41.5985	41.5985	120.785	120.785				SHT-62	High-Mg andesites				125											57.9	0.74		14.85				5.66874	5.14	6.18	0.07		2.71	4.08	0.46
Wang et al., 2006, Science in China Series D - Earth Sciences			Yixian Fm.	41.5983	41.5983	120.786	120.786				SHT-65	High-Mg andesites				125											59.31	0.73		15.94				4.85892	4.83	3.61	0.04		3.47	4.07	0.38
Wang et al., 2006, Science in China Series D - Earth Sciences			Yixian Fm.	41.5981	41.5981	120.786	120.786				SHT-66	High-Mg andesites				125											57.68	1.11		16.35				6.87447	2.9	2.39	0.11		3.3	5.01	0.29
Wang et al., 2006, Science in China Series D - Earth Sciences			Yixian Fm.	41.5981	41.5981	120.786	120.786				SHT-67	High-Mg andesites				125											58.84	0.72		15.8				4.499	4.47	4.6	0.04		3.55	3.93	0.37
Wang et al., 2006, Science in China Series D - Earth Sciences			Yixian Fm.	41.5945	41.5945	120.788	120.788				SHT-68	High-Mg andesites				125											57.24	0.69		14.15				5.33581	5.14	6.18	0.07		2.82	3.89	0.35
Wang et al., 2006, Science in China Series D - Earth Sciences			Yixian Fm.	41.5941	41.5941	120.788	120.788				SHT-69	High-Mg andesites				125											56.99	0.76		14.64				5.72273	5.45	6.16	0.07		2.69	4.19	0.54
Wang et al., 2006, Science in China Series D - Earth Sciences			Yixian Fm.	41.5936	41.5936	120.789	120.789				SHT-70	High-Mg andesites				125											57.34	0.75		14.75				5.75872	5.3	6.36	0.07		2.58	4.07	0.47
Wang et al., 2006, Science in China Series D - Earth Sciences			Yixian Fm.	41.5938	41.5938	120.789	120.789				SHT-71	High-Mg andesites				125											57.6	0.75		14.84				5.68674	5.32	6.28	0.07		2.61	4.01	0.46
Wang et al., 2006, Science in China Series D - Earth Sciences			Yixian Fm.	41.5935	41.5935	120.79	120.79				SHT-72	High-Mg andesites				125											57.63	0.74		14.99				5.49778	5.26	5.94	0.06		2.62	4.15	0.47
Wang et al., 2006, Science in China Series D - Earth Sciences			Yixian Fm.	41.5938	41.5938	120.79	120.79				SHT-73	High-Mg andesites				125											57.69	0.74		14.82				5.69573	5.23	6.59	0.08		2.6	4.05	0.46
Wang et al., 2006, Science in China Series D - Earth Sciences			Yixian Fm.	41.5931	41.5931	120.793	120.793				SHT-74	High-Mg andesites				125											57.13	0.77		14.71				5.69573	5.52	6	0.07		2.69	4.13	0.54
Wang et al., 2006, Science in China Series D - Earth Sciences			Yixian Fm.	41.5916	41.5916	120.792	120.792				SHT-77	High-Mg andesites				125											56.38	0.76		14.9				5.80371	5.65	5.51	0.1		2.71	4.02	0.54
Wang et al., 2006, Science in China Series D - Earth Sciences			Yixian Fm.	41.5919	41.5919	120.792	120.792				SHT-80	High-Mg andesites				125											56.62	0.78		15.43				5.70473	5.6	5.5	0.08		2.84	4.16	0.58
Wang et al., 2006, Science in China Series D - Earth Sciences			Yixian Fm.	41.5885	41.5885	120.792	120.792				SHT-83	High-Mg andesites				125											55.25	1.08		15.59				6.58654	6.84	3.56	0.08		2.73	3.93	0.57
Gao et al., 2008, EPSL			Yixian Fm.	41.6025	41.6025	120.781	120.781				SHT-15	Basalt				125											50.025	0.85		13.075				7.6348	7.91	10.405	0.12		2.565	2.65	0.805
Gao et al., 2008, EPSL			Yixian Fm.	41.6025	41.6025	120.781	120.781				SHT-16	Basalt				125											49.9	0.86		12.6				7.55832	7.3	12.29	0.12		2.3	2.69	0.67
Gao et al., 2008, EPSL			Yixian Fm.	41.6025	41.6025	120.781	120.781				SHT-17	Basalt				125											49.83	0.86		13.21				7.59431	7.85	10.4	0.11		2.44	2.56	0.81
Gao et al., 2008, EPSL			Yixian Fm.	41.6025	41.6025	120.781	120.781				SHT-19	Basalt				125											49.81	0.84		12.99				7.67529	7.83	11.03	0.11		2.44	2.52	0.8
Gao et al., 2008, EPSL			Yixian Fm.	41.6025	41.6025	120.781	120.781				SHT-20	Basalt				125											49.91	0.86		13.12				7.54932	8.25	10.2	0.12		2.43	2.63	0.8
Gao et al., 2008, EPSL			Yixian Fm.	41.6025	41.6025	120.781	120.781				SHT-21	Basalt				125											49.41	0.84		12.67				7.6303	8.08	11.05	0.12		2.35	2.48	0.77
Gao et al., 2008, EPSL			Yixian Fm.	41.6025	41.6025	120.781	120.781				SHT-24	Basalt				125											50.234	0.821		11.979				7.47374	7.181	11.86	0.126		3.12	2.682	0.726
Gao et al., 2008, EPSL			Yixian Fm.	41.6025	41.6025	120.781	120.781				SHT-25	Basalt				125											49.505	0.845		12.73				7.6708	8.19	10.205	0.11		2.395	2.565	0.78
Gao et al., 2008, EPSL			Yixian Fm.	41.6025	41.6025	120.781	120.781				SHT-25dup	Basalt				125											49.4	0.85		12.73				7.6393	8.155	10.195	0.11		2.39	2.585	0.78
Gao et al., 2008, EPSL			Yixian Fm.	41.6025	41.6025	120.781	120.781				SHT-27	Basalt				125											50.18	0.85		13.25				7.60331	8.19	10.05	0.11		2.47	2.65	0.81
Gao et al., 2008, EPSL			Yixian Fm.	41.6025	41.6025	120.781	120.781				SHT-28	Basalt				125											50.19	0.83		12.78				7.67529	8.14	10.86	0.11		2.39	2.58	0.77
Gao et al., 2008, EPSL			Yixian Fm.	41.6025	41.6025	120.781	120.781				SHT-30	Basalt				125											50.19	0.85		13.21				7.61231	7.96	10.22	0.12		2.55	2.65	0.81
Gao et al., 2008, EPSL			Yixian Fm.	41.6025	41.6025	120.781	120.781				SHT-31	Basalt				125											50.52	0.87		12.85				7.52233	7.32	11.51	0.12		2.35	3.01	0.67
Gao et al., 2008, EPSL			Yixian Fm.	41.6025	41.6025	120.781	120.781				SHT-32	Basalt				125											50.12	0.87		13.34				7.52233	8.38	9.63	0.11		2.54	2.61	0.83
Gao et al., 2008, EPSL			Yixian Fm.	41.6025	41.6025	120.781	120.781				SHT-33	Basalt				125											51.53	0.81		13.39				7.17141	7.53	9.72	0.11		2.56	2.72	0.74
Gao et al., 2008, EPSL			Yixian Fm.	41.6025	41.6025	120.781	120.781				SHT-34	Basalt				125											50.11	0.85		13.33				7.50433	8.25	9.73	0.11		2.5	2.69	0.82
Gao et al., 2008, EPSL			Yixian Fm.	41.6025	41.6025	120.781	120.781				SHT-35	Basalt				125											49.89	0.86		13.16				7.60331	8.01	10.47	0.11		2.49	2.6	0.8
Gao et al., 2008, EPSL			Yixian Fm.	41.6025	41.6025	120.781	120.781				SHT-36	Basalt				125											49.77	0.88		12.55				7.80127	8.47	10.77	0.12		2.39	2.48	0.76
Gao et al., 2008, EPSL			Yixian Fm.	41.6025	41.6025	120.781	120.781				SHT-37	Basalt				125											50.08	0.86		13.11				7.62131	8.04	10.45	0.11		2.49	2.64	0.81
Gao et al., 2008, EPSL			Yixian Fm.	41.6025	41.6025	120.781	120.781				SHT-41	Basalt				125											49.77	0.85		13.1				7.50433	8.19	10.22	0.12		2.48	2.57	0.81
Gao et al., 2008, EPSL			Yixian Fm.	41.6025	41.6025	120.781	120.781				SHT-42	Basalt				125											49.89	0.85		13.12				7.55382	8.445	9.98	0.125		2.485	2.655	0.81
Gao et al., 2008, EPSL			Yixian Fm.	41.6025	41.6025	120.781	120.781				SHT-43	Basalt				125											49.86	0.85		12.6				7.73828	8.33	10.76	0.12		2.38	2.56	0.76
Gao et al., 2008, EPSL			Yixian Fm.	41.6025	41.6025	120.781	120.781				SHT-44	Basalt				125											50.169	0.817		12.106				7.45484	8.273	10.245	0.12		3.366	2.608	0.828
Gao et al., 2008, EPSL			Yixian Fm.	41.6025	41.6025	120.781	120.781				SHT-45	Basalt				125											50.164	0.837		12.538				7.41435	8.02	9.989	0.126		3.469	2.617	0.86
Gao et al., 2008, EPSL			Yixian Fm.	41.6025	41.6025	120.781	120.781				SHT-49	Basalt				125											49.895	0.855		13.09				7.56282	8.08	10.275	0.11		2.485	2.59	0.805
Gao et al., 2008, EPSL			Yixian Fm.	41.6025	41.6025	120.781	120.781				SHT-50	Basalt				125											49.94	0.85		13				7.72928	8.03	10.24	0.11		2.42	2.64	0.8
Gao et al., 2008, EPSL			Yixian Fm.	41.6025	41.6025	120.781	120.781				SHT-51	Basalt				125											49.9	0.86		13.19				7.54032	8.04	10	0.12		2.56	2.62	0.82
Hong et al., 2017, Lithos			Yixian Fm.	41.65	41.65	120.8	120.8				﻿XKL10-9	High-Mg Andesite				125											53.3	1.18		14.38		8.35			6.49	9.08	0.1		2.13	3.33	0.52
Hong et al., 2017, Lithos			Yixian Fm.	41.65	41.65	120.8	120.8				XKL10-10	High-Mg Andesite				125											53.32	1.19		14.47		8.44			6.43	8.79	0.11		2.14	3.34	0.52
Hong et al., 2017, Lithos			Yixian Fm.	41.65	41.65	120.8	120.8				XKL10-12	High-Mg Andesite				125											53.34	1.17		14.47		8.24			6.53	8.91	0.1		2.13	3.33	0.52
Hong et al., 2017, Lithos			Yixian Fm.	41.65	41.65	120.8	120.8				XKL10-9(1)-3	Inclusion				125											50.957	1.385		16.38		1.448	6.699	8.00191	7.471	8.521	0.05		2.344	4.115	0.629
Hong et al., 2017, Lithos			Yixian Fm.	41.65	41.65	120.8	120.8				XKL10-9(1)-6	Inclusion				125											50.525	1.229		15.295		1.48	6.678	8.0097	7.045	11.162	0.055		2.217	3.739	0.574
Hong et al., 2017, Lithos			Yixian Fm.	41.65	41.65	120.8	120.8				XKL10-9(1)-7	Inclusion				125											51.107	1.376		15.746		1.466	6.697	8.01611	7.305	9.342	0.049		2.332	3.987	0.593
Hong et al., 2017, Lithos			Yixian Fm.	41.65	41.65	120.8	120.8				XKL10-9(2)-1A	Inclusion				125											51.248	1.229		15.202		1.484	6.718	8.0533	7.367	10.04	0.058		2.192	3.879	0.585
Hong et al., 2017, Lithos			Yixian Fm.	41.65	41.65	120.8	120.8				XKL10-9(2)-1B	Inclusion				125											51.436	1.244		14.932		1.503	6.648	8.0004	7.242	10.198	0.06		2.229	3.939	0.568
Hong et al., 2017, Lithos			Yixian Fm.	41.65	41.65	120.8	120.8				XKL10-9(2)-3	Inclusion				125											51.044	1.395		15.59		1.486	6.668	8.0051	6.935	9.855	0.04		2.296	4.087	0.603
Hong et al., 2017, Lithos			Yixian Fm.	41.65	41.65	120.8	120.8				XKL10-9(2)-4A	Inclusion				125											50.666	1.302		15.984		1.471	6.681	8.00461	7.21	9.596	0.036		2.365	4.067	0.621
Hong et al., 2017, Lithos			Yixian Fm.	41.65	41.65	120.8	120.8				XKL10-9(2)-4B	Inclusion				125											51.491	1.393		15.433		1.462	6.7	8.01551	7.048	9.703	0.041		2.287	3.864	0.579
Hong et al., 2017, Lithos			Yixian Fm.	41.65	41.65	120.8	120.8				XKL10-9(2)-5	Inclusion				125											51.071	1.268		15.643		1.46	6.695	8.00871	7.128	9.937	0.045		2.24	3.914	0.599
Hong et al., 2017, Lithos			Yixian Fm.	41.65	41.65	120.8	120.8				XKL10-9(4)-1	Inclusion				125											50.213	1.438		15.703		1.505	6.706	8.0602	7.226	10.093	0.05		2.329	4.124	0.613
Hong et al., 2017, Lithos			Yixian Fm.	41.65	41.65	120.8	120.8				XKL10-9(4)-2	Inclusion				125											50.996	1.367		15.709		1.48	6.677	8.0087	6.96	9.769	0.042		2.362	4.035	0.604
Hong et al., 2017, Lithos			Yixian Fm.	41.65	41.65	120.8	120.8				XKL10-9(4)-3	Inclusion				125											50.986	1.356		15.319		1.462	6.739	8.05451	7.168	10.397	0.041		2.208	3.733	0.591
Hong et al., 2017, Lithos			Yixian Fm.	41.65	41.65	120.8	120.8				XKL10-9(4)-7	Inclusion				125											50.458	1.279		15.181		1.533	6.629	8.00839	7.091	10.811	0.037		2.325	4.065	0.591
Hong et al., 2017, Lithos			Yixian Fm.	41.65	41.65	120.8	120.8				XKL10-9(4)-8	Inclusion				125											50.527	1.344		15.269		1.507	6.652	8.008	6.891	10.979	0.027		2.274	3.958	0.571
Hong et al., 2017, Lithos			Yixian Fm.	41.65	41.65	120.8	120.8				XKL10-9(5)-2	Inclusion				125											50.061	1.362		15.417		1.52	6.641	8.0087	7.515	10.348	0.047		2.273	4.16	0.656
Hong et al., 2017, Lithos			Yixian Fm.	41.65	41.65	120.8	120.8				XKL10-9(5)-3	Inclusion				125											50.852	1.315		15.685		1.488	6.668	8.0069	7.265	9.636	0.057		2.306	4.116	0.613
Hong et al., 2017, Lithos			Yixian Fm.	41.65	41.65	120.8	120.8				XKL10-9(5)-4	Inclusion				125											50.572	1.279		15.204		1.519	6.64	8.0068	6.916	10.978	0.041		2.255	4.007	0.59
Hong et al., 2017, Lithos			Yixian Fm.	41.65	41.65	120.8	120.8				XKL10-9(5)-6	Inclusion				125											50.583	1.265		15.578		1.528	6.653	8.02789	7.463	9.529	0.052		2.294	4.332	0.723
Hong et al., 2017, Lithos			Yixian Fm.	41.65	41.65	120.8	120.8				XKL10-9(6)-1	Inclusion				125											50.223	1.333		15.846		1.486	6.718	8.0551	7.36	10.017	0.042		2.262	4.08	0.633
Hong et al., 2017, Lithos			Yixian Fm.	41.65	41.65	120.8	120.8				XKL10-9(6)-2	Inclusion				125											50.805	1.283		15.728		1.49	6.669	8.0097	7.127	9.765	0.06		2.379	4.079	0.616
Hong et al., 2017, Lithos			Yixian Fm.	41.65	41.65	120.8	120.8				XKL10-9(6)-3A	Inclusion				125											50.329	1.248		15.596		1.447	6.71	8.01201	7.139	10.958	0.046		2.249	3.634	0.645
Hong et al., 2017, Lithos			Yixian Fm.	41.65	41.65	120.8	120.8				XKL10-9(6)-3B	Inclusion				125											50.084	1.312		15.596		1.475	6.682	8.00921	7.674	10.347	0.065		2.175	3.958	0.632
Hong et al., 2017, Lithos			Yixian Fm.	41.65	41.65	120.8	120.8				XKL10-9(6)-4	Inclusion				125											51.745	1.242		14.774		1.548	6.613	8.00589	6.898	10.06	0.048		2.33	4.145	0.598
Hong et al., 2017, Lithos			Yixian Fm.	41.65	41.65	120.8	120.8				XKL10-9(6)-7	Inclusion				125											50.561	1.259		15.421		1.501	6.657	8.0076	7.11	10.536	0.041		2.286	4.004	0.622
Hong et al., 2017, Lithos			Yixian Fm.	41.65	41.65	120.8	120.8				XKL10-9(7)-2	Inclusion				125											51.075	1.368		15.521		1.512	6.745	8.1055	7.209	9.477	0.041		2.401	4.058	0.593
Hong et al., 2017, Lithos			Yixian Fm.	41.65	41.65	120.8	120.8				XKL10-9(7)-3	Inclusion				125											51.646	1.238		14.807		1.523	6.637	8.0074	7.033	10.236	0.056		2.204	4.045	0.574
Hong et al., 2017, Lithos			Yixian Fm.	41.65	41.65	120.8	120.8				XKL10-9(7)-4	Inclusion				125											50.284	1.466		15.876		1.499	6.719	8.0678	7.388	9.577	0.044		2.321	4.183	0.645
Yang et al., 2019, GSAB		Xinyizhong	Zhangjiakou Fm	40.8935	40.8935	115.863	115.863				CC-5-1	Rhyolite				129.88											71.57	0.28		13.67				2.43846	0.75	0.28	0.039		6.11	2.9	0.05
Yang et al., 2019, GSAB		Xinyizhong	Zhangjiakou Fm	40.8935	40.8935	115.863	115.863				CC-5-2	Rhyolite				129.88											72.28	0.262		13.56				1.74561	0.25	0.28	0.038		5.79	2.94	0.03
Yang et al., 2019, GSAB		Mingjicha	Zhangjiakou Fm	40.862	40.862	115.882	115.882				CC-6-1	Rhyolite				131.35											74.16	0.183		11.93				3.12231	0.52	0.21	0.032		5.13	2.87	0.01
Yang et al., 2019, GSAB		Mingjicha	Zhangjiakou Fm	40.862	40.862	115.882	115.882				CC-6-2	Rhyolite				131.35											74.84	0.176		11.74				3.25728	0.35	0.13	0.051		5.18	2.69	0.01
Yang et al., 2019, GSAB		Xihongshiyaocun	Zhangjiakou Fm	40.8813	40.8813	115.883	115.883				CC-7-1	Rhyolite				136.63											76.02	0.145		10.81				2.73539	0.2	0.09	0.054		5.33	2.3	0.01
Yang et al., 2019, GSAB		Jingjiagou	Zhangjiakou Fm	41.0516	41.0516	115.715	115.715				CC-13-1	Rhyolite				136.9											74.41	0.251		12.78				2.15052	0.5	0.3	0.045		4.99	3	0.05
Yang et al., 2019, GSAB		Jingjiagou	Zhangjiakou Fm	41.0516	41.0516	115.715	115.715				CC-13-2	Rhyolite				136.9											73.95	0.26		13.27				2.04255	0.38	0.24	0.029		5.55	3.18	0.05
Yang et al., 2019, GSAB		Zhongyaozicun	Zhangjiakou Fm	41.0649	41.0649	115.691	115.691				CC-15-1	Rhyolite				136.62											73.98	0.231		13.86				2.20451	0.18	0.33	0.044		3.99	3.19	0.05
Yang et al., 2019, GSAB		Zhanglijiagoucun	Zhangjiakou Fm	41.0896	41.0896	115.674	115.674				CC-16-1	Rhyolite				131.78											75.52	0.137		11.82				2.30349	0.28	0.04	0.029		3.77	4.13	0.01
Yang et al., 2019, GSAB		Dunshangcun	Zhangjiakou Fm	41.1256	41.1256	115.625	115.625				CC-17-1	Rhyolite				131.42											71.32	0.299		14.06				1.87158	1.08	0.22	0.026		5.29	3.64	0.06
Meng et al., 2018, Lithos		Daohugou, Ningcheng	Tiaojishan Fm.	41.4167	41.4167	119.267	119.267				DHG-28	Trachyte				164											62.86	1.2		17.31				3.57221	3.27	0.52	0.05		3.29	5.68	0.43
Meng et al., 2018, Lithos		Daohugou, Ningcheng	Tiaojishan Fm.	41.4167	41.4167	119.267	119.267				DHG-29	Trachyte				164											63.58	1.26		17.22				3.6172	3.16	0.39	0.05		3.51	5.57	0.55
Meng et al., 2018, Lithos		Daohugou, Ningcheng	Tiaojishan Fm.	41.4167	41.4167	119.267	119.267				DHG-30	Trachyte				164											63.48	1.28		17.46				3.31126	3.09	0.36	0.05		3.72	5.3	0.49
Meng et al., 2018, Lithos		Daohugou, Ningcheng	Tiaojishan Fm.	41.4167	41.4167	119.267	119.267				DHG-31	Trachyte				164											63.83	1.19		17.46				3.09531	3.19	0.47	0.07		3.31	5.14	0.42
Meng et al., 2018, Lithos		Daohugou, Ningcheng	Tiaojishan Fm.	41.4167	41.4167	119.267	119.267				DHG-32	Trachyte				164											65.34	1.17		17.24				2.15952	3.05	0.36	0.11		3.56	4.94	0.44
Meng et al., 2018, Lithos		Daohugou, Ningcheng	Tiaojishan Fm.	41.4167	41.4167	119.267	119.267				DHG-34	Rhyolite				164											74.57	0.07		13.65				0.791824	0.3	0.03	0.01		5.49	3.95	0.02
Meng et al., 2018, Lithos		Daohugou, Ningcheng	Tiaojishan Fm.	41.4167	41.4167	119.267	119.267				DHG-37	Trachyandesite				164											55.93	1.12		15.15				7.30638	5.61	2.95	0.2		3.16	4.69	0.72
Meng et al., 2018, Lithos		Daohugou, Ningcheng	Tiaojishan Fm.	41.4167	41.4167	119.267	119.267				DHG-39	Trachyandesite				164											54.64	1.12		14.91				7.29738	5.65	4.7	0.08		3	4.65	0.7
Meng et al., 2018, Lithos		Daohugou, Ningcheng	Tiaojishan Fm.	41.4167	41.4167	119.267	119.267				DHG-40	Trachyandesite				164											55.3	1.11		14.96				7.13541	5.55	4.55	0.09		2.99	4.65	0.71
Meng et al., 2018, Lithos		Daohugou, Ningcheng	Tiaojishan Fm.	41.4167	41.4167	119.267	119.267				DHG-41	Trachyandesite				164											56.63	1.07		15.58				6.3076	5.61	3.24	0.22		3.17	4.49	0.67
Meng et al., 2018, Lithos		Daohugou, Ningcheng	Tiaojishan Fm.	41.4167	41.4167	119.267	119.267				DHG-54	Trachyandesite				164											56.93	1.03		15.9				7.02744	5.41	1.93	0.05		3.3	5.05	0.77
Meng et al., 2018, Lithos		Daohugou, Ningcheng	Tiaojishan Fm.	41.4167	41.4167	119.267	119.267				DHG-55	Trachyandesite				164											56.18	1.08		16.8				7.55832	4.32	1.32	0.07		3.6	5	0.72
Meng et al., 2018, Lithos		Daohugou, Ningcheng	Tiaojishan Fm.	41.4167	41.4167	119.267	119.267				DHG-56	Trachyandesite				164											56.99	1.02		15.77				5.42579	5.49	3.84	0.18		3.18	4.66	0.74
Meng et al., 2018, Lithos		Daohugou, Ningcheng	Tiaojishan Fm.	41.4167	41.4167	119.267	119.267				DHG-57	Rhyolite				164											71.24	0.06		14.79				1.19673	0.99	0.46	0.04		4.52	4.11	0.05
Meng et al., 2018, Lithos		Daohugou, Ningcheng	Tiaojishan Fm.	41.4167	41.4167	119.267	119.267				DHG-58	Trachyandesite				164											55.27	1.13		15.14				7.2164	5.6	3.54	0.21		3.19	4.76	0.72
Meng et al., 2018, Lithos		Daohugou, Ningcheng	Tiaojishan Fm.	41.4167	41.4167	119.267	119.267				DHG-59	Trachyandesite				164											55.55	1.12		15.2				6.95545	5.79	4.12	0.1		2.37	4.96	0.72
Meng et al., 2018, Lithos		Daohugou, Ningcheng	Tiaojishan Fm.	41.4167	41.4167	119.267	119.267				DHG-60	Trachyandesite				164											55.46	1.12		15.15				7.02744	5.83	4.27	0.1		2.71	4.72	0.73
Meng et al., 2018, Lithos		Daohugou, Ningcheng	Tiaojishan Fm.	41.4167	41.4167	119.267	119.267				DHG-61	Basaltic Trachyandesite				164											54.68	1.12		15.28				6.97345	6.99	4.53	0.12		1.8	4.03	0.61
Meng et al., 2018, Lithos		Daohugou, Ningcheng	Tiaojishan Fm.	41.4167	41.4167	119.267	119.267				DHG-62	Trachyandesite				164											59.69	0.75		15.7				6.03766	4.09	1.6	0.07		3.67	4.76	0.53
Meng et al., 2018, Lithos		Daohugou, Ningcheng	Tiaojishan Fm.	41.4167	41.4167	119.267	119.267				DHG-63	Trachyandesite				164											56.19	1.02		15.15				6.83848	5.52	4.5	0.09		2.98	4.5	0.63
Meng et al., 2018, Lithos		Daohugou, Ningcheng	Tiaojishan Fm.	41.4167	41.4167	119.267	119.267				DHG-64	Basaltic Trachyandesite				164											54.6	1.11		15.04				7.44135	6.27	6.05	0.11		2.47	4.01	0.59
Meng et al., 2018, Lithos		Daohugou, Ningcheng	Tiaojishan Fm.	41.4167	41.4167	119.267	119.267				DHG-65	Basaltic Trachyandesite				164											54.44	1.09		14.91				7.46834	6.25	6.04	0.1		2.4	3.84	0.56
Liu et al., 2008, GCA		Yixian	Yixian Fm.	41.59	41.59	120.794	120.794				YX-25	Basalt	122	125		124											49.3	0.71		12.5				8.62908	7.57	14.1	0.14		1.27	2.99	0.68
Liu et al., 2008, GCA		Yixian	Yixian Fm.	41.59	41.59	120.794	120.794				YX-26	Basalt	122	125		124											48.9	0.69		12.4				8.60209	7.44	14.4	0.14		1.22	2.89	0.66
Liu et al., 2008, GCA		Yixian	Yixian Fm.	41.59	41.59	120.794	120.794				YX-27	Basalt	122	125		124											49.3	0.71		12.5				8.5571	7.46	13.9	0.14		1.26	2.98	0.67
Liu et al., 2008, GCA		Yixian	Yixian Fm.	41.59	41.59	120.794	120.794				YX-30	Basalt	122	125		124											49.6	0.73		12.5				8.22417	7.59	12.8	0.14		1.45	3.25	0.68
Liu et al., 2008, GCA		Yixian	Yixian Fm.	41.59	41.59	120.794	120.794				YX-103	Basalt	122	125		124											49.3	0.7		12.3				8.52111	7.48	14	0.15		1.27	3.13	0.67
Liu et al., 2008, GCA		Yixian	Yixian Fm.	41.59	41.59	120.794	120.794				YX-108	Basalt	122	125		124											49.3	0.7		12.4				8.46712	7.3	14	0.15		1.29	2.99	0.67
Jiang et al., 2009, Contributions to Mineralogy and Petrology			Shuangshuiquan pluton	40.8333	40.8333	115.417	115.417				﻿JN72	Granite				142.9											76.95	0.07		11.86		1.05			0.58	0.06	0.04		4.63	4.04	0.01
Jiang et al., 2009, Contributions to Mineralogy and Petrology			Shuangshuiquan pluton	40.8333	40.8333	115.417	115.417				JN73	Granite				142.9											77.1	0.06		12.16		1			0.42	0.07	0.04		4.39	4.1	0.01
Jiang et al., 2009, Contributions to Mineralogy and Petrology			Shuangshuiquan pluton	40.8333	40.8333	115.417	115.417				JN74	Granite				142.9											76.62	0.07		12.02		1.09			0.39	0.08	0.05		4.58	3.88	0.01
Jiang et al., 2009, Contributions to Mineralogy and Petrology			Shuangshuiquan pluton	40.8333	40.8333	115.417	115.417				JN75	Granite				142.9											76.84	0.06		11.98		0.98			0.43	0.07	0.04		4.49	3.95	0.01
Jiang et al., 2009, Contributions to Mineralogy and Petrology			Shuangshuiquan pluton	40.8333	40.8333	115.417	115.417				JN0743	Granite				142.9											77.39	0.07		12.2		1.24			0.27	0.07	0.03		4.34	4.09	0.01
Jiang et al., 2009, Contributions to Mineralogy and Petrology			Shuangshuiquan pluton	40.8333	40.8333	115.417	115.417				JN0746	Granite				142.9											76.76	0.06		12.26		1.24			0.28	0.06	0.04		4.53	4.13	0.02
Jiang et al., 2009, Contributions to Mineralogy and Petrology			Shuangshuiquan pluton	40.8333	40.8333	115.417	115.417				JN0747	Granite				142.9											77.28	0.07		12.23		1.15			0.19	0.06	0.04		4.62	3.96	0.01
Jiang et al., 2009, Contributions to Mineralogy and Petrology			Shuangshuiquan pluton	40.8333	40.8333	115.417	115.417				JN0749	Granite				142.9											74.68	0.13		13.03		1.47			0.41	0.17	0.03		4.92	4.12	0.03
Su et al., 2007, Lithos			Xuejiashiliang pluton	40.3194	40.3194	116.34	116.34				WY-2	Gabbro	124	129		127											47.49	1.51		16.6				10.9776	10.53	7.6	0.11		0.61	2.97	0.2
Su et al., 2007, Lithos			Xuejiashiliang pluton	40.3194	40.3194	116.34	116.34				WY-3	Monzogabbro	124	129		127											45.19	3		15.92				12.2733	8.83	5.21	0.17		1.64	3.98	1.75
Su et al., 2007, Lithos			Xuejiashiliang pluton	40.3194	40.3194	116.34	116.34				WY-4	Syenite	124	129		127											59.26	0.88		19.32				4.10309	3.67	1.44	0.06		4.35	5.31	0.42
Su et al., 2007, Lithos			Xuejiashiliang pluton	40.3194	40.3194	116.34	116.34				WY-14	Granite	124	129		127											74.6	0.09		14.1				0.980782	0.24	0.01	0.02		4.42	5.08	0.01
Su et al., 2007, Lithos			Xuejiashiliang pluton	40.3194	40.3194	116.34	116.34				WY-16	Monzonite	124	129		127											54.79	1.59		16.94				7.89125	5.66	3.06	0.13		3.14	5.38	0.59
Su et al., 2007, Lithos			Xuejiashiliang pluton	40.3194	40.3194	116.34	116.34				BB1	Gabbro	124	129		127											48.49	2.54		17.85				9.69984	8.33	4.29	0.14		1.4	4.59	1.05
Su et al., 2007, Lithos			Xuejiashiliang pluton	40.3194	40.3194	116.34	116.34				BB2	Gabbro	124	129		127											46.51	2.39		16.57				11.1125	8.05	5.61	0.13		1.88	4.09	1.38
Su et al., 2007, Lithos			Xuejiashiliang pluton	40.3194	40.3194	116.34	116.34				BB5	Monzogabbro	124	129		127											57.42	1.41		16.75				6.62253	4.67	3.17	0.1		3.14	4.82	0.59
Su et al., 2007, Lithos			Xuejiashiliang pluton	40.3194	40.3194	116.34	116.34				BB6	Syenite	124	129		127											65.96	0.42		16.15				2.90635	1.66	0.45	0.09		5.78	5.38	0.1
Su et al., 2007, Lithos			Xuejiashiliang pluton	40.3194	40.3194	116.34	116.34				BB9	Granite	124	129		127											75.32	0.15		13.35				0.998778	0.57	0.17	0.06		4.79	4.54	0.02
Sun et al., 2010, Lithos			Fangshan pluton	39.7327	39.7327	115.954	115.954				07FS02	Granodiorite	130	133		132											63.3	0.72		16.2				4.53499	3.94	2.24	0.07		3.47	4.39	0.33
Sun et al., 2010, Lithos			Fangshan pluton	39.7327	39.7327	115.954	115.954				07FS06	Mafic Enclave	130	133		132											60.6	0.86		16.1				5.55177	4.9	3.19	0.1		2.83	4.53	0.41
Sun et al., 2010, Lithos			Fangshan pluton	39.7327	39.7327	115.954	115.954				07FS09	Quartz Monzodiorite	130	133		132											63.2	0.6		17.1				4.56199	3.96	1.73	0.1		3.46	4.35	0.29
Sun et al., 2010, Lithos			Fangshan pluton	39.7327	39.7327	115.954	115.954				07FS11	Porphyritic Granodiorite	130	133		132											66.1	0.69		16				3.20329	2.67	1.35	0.04		4.19	4.53	0.31
Sun et al., 2010, Lithos			Fangshan pluton	39.7327	39.7327	115.954	115.954				08FS02	Quartz Monzodiorite	130	133		132											61.6	0.68		16.3				5.28183	4.81	2.48	0.09		3.67	3.77	0.3
Sun et al., 2010, Lithos			Fangshan pluton	39.7327	39.7327	115.954	115.954				08FS10	Porphyritic Granodiorite	130	133		132											63.2	0.65		16.3				4.481	3.96	2.13	0.08		3.58	4.33	0.32
Fu et al., 2016, Lithos		Kalaqin MCC		41.9303	41.9303	118.834	118.834				JY1	Adamellite				133											68.01	0.41		15.59		2.76			2.09	1.15	0.04		4.83	4.14	0.15
Fu et al., 2016, Lithos		Kalaqin MCC		41.9303	41.9303	118.834	118.834				JY3	Adamellite				133											66	0.59		15.57		3.99			2.69	1.62	0.07		4.07	4.25	0.21
Fu et al., 2016, Lithos		Kalaqin MCC		41.9303	41.9303	118.834	118.834				JY6	Adamellite				133											60.7	0.7		17.22		5.27			3.82	2.43	0.09		4.46	4.37	0.3
Fu et al., 2016, Lithos		Kalaqin MCC		41.9303	41.9303	118.834	118.834				JY7	Adamellite				133											62.06	0.64		17.12		4.55			3.42	2.05	0.08		4.74	4.33	0.27
Fu et al., 2016, Lithos		Kalaqin MCC		41.9303	41.9303	118.834	118.834				20-KL-37	Adamellite				133											61.76	0.72		15.85		6.27			3.4	2.02	0.08		4.63	3.8	0.29
Fu et al., 2016, Lithos		Kalaqin MCC		41.9303	41.9303	118.834	118.834				20-KL-58	Adamellite				133											68.63	0.44		15.15		2.7			2.28	1.01	0.07		3.92	4.31	0.14
Fu et al., 2016, Lithos		Kalaqin MCC		41.9303	41.9303	118.834	118.834				20-KL-85	Adamellite				133											67.1	0.58		14.81		4.15			2.88	1.38	0.08		3.16	4.3	0.21
Fu et al., 2016, Lithos		Kalaqin MCC		41.9303	41.9303	118.834	118.834				20-KL-65	Adamellite				133											72.2	0.2		14.19		2.03			1.17	0.4	0.05		5.05	3	0.07
Fu et al., 2016, Lithos		Kalaqin MCC		41.9303	41.9303	118.834	118.834				L2	Mafic Enclave				133											57.5	0.8		16.09		6.97			5.31	3.41	0.2		2.56	4.23	0.36
Fu et al., 2016, Lithos		Kalaqin MCC		41.9303	41.9303	118.834	118.834				L3	Mafic Enclave				133											58	0.84		17.44		6.68			4.94	3.18	0.11		3.04	4.79	0.39
Fu et al., 2016, Lithos		Kalaqin MCC		41.9303	41.9303	118.834	118.834				L4	Mafic Enclave				133											57	0.77		14.77		7.26			5.68	3.64	0.29		2.09	3.69	0.33
Fu et al., 2016, Lithos		Kalaqin MCC		41.9303	41.9303	118.834	118.834				JB1	Mafic Enclave				133											54.05	2.28		16.85		8.64			5.4	3.44	0.13		2.55	5.2	0.51
Fu et al., 2016, Lithos		Kalaqin MCC		41.9303	41.9303	118.834	118.834				JB2	Mafic Enclave				133											54.81	2.18		16.73		8.41			5.25	3.34	0.12		2.71	5.05	0.48
Fu et al., 2016, Lithos		Kalaqin MCC		41.9303	41.9303	118.834	118.834				JB3	Mafic Enclave				133											55.55	2.08		16.62		8.18			5.11	3.25	0.12		2.86	4.91	0.46
Lin et al., 2017, PHD's Dissertation				40.9103	40.9103	120.407	120.407				S4281	Trachy andensite		Early Jurassic													50.88	1.94		14.5				13.24	5.25	3.49	0.16		1.62	5.25	0.24
Lin et al., 2017, PHD's Dissertation				40.9103	40.9103	120.407	120.407				S4119	Trachy andensite		Early Jurassic													62.97	0.57		15.76				4.77	2.45	2.09	0.08		4.15	5.63	0.35
Lin et al., 2017, PHD's Dissertation				40.9103	40.9103	120.407	120.407				S4121	Trachy andensite		Early Jurassic													61.5	0.67		16.09				5.56	4.21	2.24	0.09		3.64	4.76	0.41
Lin et al., 2017, PHD's Dissertation				40.9103	40.9103	120.407	120.407				S4132	Trachy andensite		Early Jurassic													62.69	0.62		15.33				5.28	3.29	2.47	0.05		4.4	4.4	0.43
Lin et al., 2017, PHD's Dissertation				40.9103	40.9103	120.407	120.407				S4134	Trachy andensite		Early Jurassic													61.53	0.68		16.18				5.54	3.93	2.25	0.09		3.53	4.94	0.42
Lin et al., 2017, PHD's Dissertation				40.9103	40.9103	120.407	120.407				S4136	Trachy andensite		Early Jurassic													62.19	0.57		15.78				5.74	3.57	2.07	0.09		3.72	4.78	0.33
Lin et al., 2017, PHD's Dissertation				40.9103	40.9103	120.407	120.407				S5251	Trachy andensite		Early Jurassic													60.7	0.69		16				5.66	2.97	2.71	0.07		4.27	4.73	0.41
Lin et al., 2017, PHD's Dissertation				40.9103	40.9103	120.407	120.407				S4146	Trachy andensite		Early Jurassic													63.02	0.64		15.2				5.14	3.23	2.55	0.07		4.35	4.42	0.47
Lin et al., 2017, PHD's Dissertation				40.9103	40.9103	120.407	120.407				S4145	Trachy andensite		Early Jurassic													60.79	0.77		15.63				6.14	4.11	3.14	0.09		4.02	4.43	0.49
Lin et al., 2017, PHD's Dissertation				40.79	40.79	120.388	120.388				YX-04	Trachy andensite		Early Jurassic													61.5	0.67		15.86				5.46	4.09	2.16	0.09		3.37	4.65	0.43
Lin et al., 2017, PHD's Dissertation				40.9103	40.9103	120.407	120.407				S5245	Trachy andensite		Early Jurassic													63.32	0.57		15.51				4.26	2.61	2.17	0.06		4.7	4.68	0.29
Lin et al., 2017, PHD's Dissertation				40.9103	40.9103	120.407	120.407				N17-1	Trachy dacite		Early Jurassic													68.59	0.37		15.48				2.69	0.76	0.51	0.03		4.96	5	0.15
Lin et al., 2017, PHD's Dissertation				40.9103	40.9103	120.407	120.407				N17-2	Trachy dacite		Early Jurassic													69.67	0.36		15.51				2.49	2.07	0.27	0.04		4.53	4.28	0.16
Lin et al., 2017, PHD's Dissertation				40.9103	40.9103	120.407	120.407				N18-2	Trachy dacite		Early Jurassic													67.28	0.38		16.24				2.71	1.41	0.49	0.04		4.5	5.07	0.16
Lin et al., 2017, PHD's Dissertation				40.9103	40.9103	120.407	120.407				N19-1	Trachy dacite		Early Jurassic													67.44	0.37		16.06				2.6	1.54	0.41	0.04		4.27	5.22	0.16
Lin et al., 2017, PHD's Dissertation				40.9103	40.9103	120.407	120.407				N20-2	Trachy dacite		Early Jurassic													69.05	0.34		15.59				2.54	1.19	0.3	0.03		3.35	6.01	0.16
Lin et al., 2017, PHD's Dissertation				40.9103	40.9103	120.407	120.407				N21-1	Trachy dacite		Early Jurassic													66	0.52		15.39				4.51	2.11	1.78	0.07		3.82	3.95	0.3
Lin et al., 2017, PHD's Dissertation				40.9103	40.9103	120.407	120.407				N22-1	Trachy dacite		Early Jurassic													67.05	0.36		15.34				2.88	1.84	0.55	0.05		4.43	4.35	0.17
Lin et al., 2017, PHD's Dissertation				40.9103	40.9103	120.407	120.407				N23-1	Rhyolite		Early Jurassic													71.45	0.28		14.23				2.69	1.17	0.57	0.03		5.02	3.97	0.11
Lin et al., 2017, PHD's Dissertation				40.9236	40.9236	120.413	120.413				YX-06	Trachy dacite		Early Jurassic													65.47	0.41		15.29				3.38	2	1.66	0.08		4.34	3.46	0.19
Lin et al., 2017, PHD's Dissertation				40.9364	40.9364	120.447	120.447				YX-07	Rhyolite		Early Jurassic													71.39	0.28		14.41				2.44	0.63	0.4	0.06		5	4.35	0.1
Lin et al., 2017, PHD's Dissertation				40.9911	40.9911	120.381	120.381				YX-08	Trachy dacite		Early Jurassic													68.9	0.24		15.16				2.43	1.61	0.65	0.2		4.73	4.15	0.09
Lin et al., 2017, PHD's Dissertation				40.9103	40.9103	120.407	120.407				S5234	Rhyolite		Early Jurassic													71.13	0.23		14.93				2.05	1.62	0.42	0.06		4.35	4.34	0.08
Lin et al., 2017, PHD's Dissertation				40.9596	40.9596	120.207	120.207				S7108	Basalt				155											48.28	2.88		16.9				8.17	9.18		0.15		0.77	3.15	0.34
Lin et al., 2017, PHD's Dissertation				40.9596	40.9596	120.207	120.207				S7109	Basalt				155											46.71	3.39		15.47				8.17	7.52		0.15		1.29	3.18	0.48
Lin et al., 2017, PHD's Dissertation				40.9596	40.9596	120.207	120.207				N01-2	Trachy andensite				155											53.94	1.08		16.45				9.93	8.26	1.92	0.18		3.42	3.36	0.36
Lin et al., 2017, PHD's Dissertation				40.9596	40.9596	120.207	120.207				S5200	Trachy andensite				155											53.13	1.03		17.92				8.63	8.47	1.36	0.19		3.67	4.25	0.39
Lin et al., 2017, PHD's Dissertation				40.9289	40.9289	120.32	120.32				YX-01	Trachy andensite				155											56.95	1.12		17.46				8.17	3.61	1.7	0.11		3.36	6.01	0.5
Lin et al., 2017, PHD's Dissertation				40.9596	40.9596	120.207	120.207				N05-1	Trachy andensite				155											60.29	1.05		18.02				5.61	3.43	1.13	0.11		4.57	4.62	0.47
Lin et al., 2017, PHD's Dissertation				40.9596	40.9596	120.207	120.207				N04-1	Trachy dacite				155											64.74	0.88		15.3				4.9	2.87	0.41	0.15		5.91	3.88	0.29
Lin et al., 2017, PHD's Dissertation				40.9903	40.9903	120.093	120.093				N03-1	Trachy andensite				155											59.28	1.02		18.81				6.31	4.92	0.61	0.07		3.88	3.93	0.4
Lin et al., 2017, PHD's Dissertation				40.9596	40.9596	120.207	120.207				S4203	Trachy andensite				155											58.25	0.95		16.96				7.6	5.05	2.02	0.09		3.23	4.57	0.41
Lin et al., 2017, PHD's Dissertation				40.9596	40.9596	120.207	120.207				S5183	Trachy andensite				155											60.63	0.76		16.5				6.14	4.52	2.31	0.13		3.99	4.07	0.26
Lin et al., 2017, PHD's Dissertation				40.9596	40.9596	120.207	120.207				S6100	Trachy andensite				155											56.14	1.11		16.58				8.83	6.06	3.04	0.11		2.72	4	0.42
Lin et al., 2017, PHD's Dissertation				40.9596	40.9596	120.207	120.207				S4170	Trachy andensite				155											55.33	1.13		17.65				8.22	5.43	2.91	0.11		2.41	5.38	0.51
Lin et al., 2017, PHD's Dissertation				40.9596	40.9596	120.207	120.207				S4173	Trachy andensite				155											61.39	0.84		17.03				6.25	3.81	1.15	0.16		3.56	4.72	0.4
Lin et al., 2017, PHD's Dissertation				40.9596	40.9596	120.207	120.207				S4174	Trachy andensite				155											61.36	0.83		16.82				5.87	4.13	1.32	0.08		3.58	4.97	0.37
Lin et al., 2017, PHD's Dissertation				40.9596	40.9596	120.207	120.207				S4175	Trachy andensite				155											57.02	1.04		17.52				7.85	5.04	2.05	0.08		2.62	5.45	0.46
Lin et al., 2017, PHD's Dissertation				40.9596	40.9596	120.207	120.207				S4176	Trachy andensite				155											62.09	0.79		16.27				6.01	4.15	1.35	0.06		3.66	4.58	0.37
Lin et al., 2017, PHD's Dissertation				40.9596	40.9596	120.207	120.207				S4177	Trachy andensite				155											60.27	0.88		16.87				6.88	3.89	1.32	0.08		3.3	5.33	0.41
Lin et al., 2017, PHD's Dissertation				40.9596	40.9596	120.207	120.207				S4178	Trachy andensite				155											56.69	1.04		17.3				7.96	5.46	2.24	0.08		2.88	5	0.45
Lin et al., 2017, PHD's Dissertation				40.9596	40.9596	120.207	120.207				S4180	Trachy andensite				155											62.43	0.83		16.34				5.95	3.64	1.92	0.05		3.03	4.77	0.38
Lin et al., 2017, PHD's Dissertation				40.9596	40.9596	120.207	120.207				S7127	Trachy andensite				155											60.77	0.84		16.9				6.96	4.67	2.28	0.06		3.27	4.65	0.39
Lin et al., 2017, PHD's Dissertation				40.6791	40.6791	120.634	120.634				S4037	Trachy dacite				155											64.11	0.65		15.44				4.96	3.02	2.06	0.09		3.76	4.7	0.26
Lin et al., 2017, PHD's Dissertation				40.6791	40.6791	120.634	120.634				WH3019	Trachy dacite				155											64.94	0.6		16.33				4.55	2.15	0.79	0.08		3.69	4.63	0.25
Lin et al., 2017, PHD's Dissertation				40.6708	40.6708	120.635	120.635				STTW-03	Trachy dacite				160											63.02	0.62		16.92				4.11	2.93	2.08	0.06		3.41	4.35	0.23
Lin et al., 2017, PHD's Dissertation				40.6791	40.6791	120.634	120.634				S4011	Trachy andensite				155											62.43	0.67		15.99				5.69	1.75	1.68	0.05		4.68	4.42	0.27
Lin et al., 2017, PHD's Dissertation				40.6791	40.6791	120.634	120.634				S4071	Trachy andensite				155											62.33	0.72		15.97				6.49	3.08	1.89	0.08		3.55	4.42	0.3
Lin et al., 2017, PHD's Dissertation				40.6844	40.6844	120.614	120.614				YX-03	Trachy andensite				149.2											59.31	0.8		15.63				7.02	3.64	2.49	0.08		4.58	4.1	0.32
Lin et al., 2017, PHD's Dissertation				40.6791	40.6791	120.634	120.634				S7005-2	Trachy andensite				155											60.53	0.79		16.77				7.91	3.55	2.01	0.12		2.2	4.6	0.41
Lin et al., 2017, PHD's Dissertation				40.6791	40.6791	120.634	120.634				S5008	Trachy andensite				155											59.69	0.82		16.81				6.98	4.57	2.44	0.12		3.65	3.81	0.35
Lin et al., 2017, PHD's Dissertation				40.6791	40.6791	120.634	120.634				S7023	Trachy andensite				155											57.73	0.99		16.92				8.27	3.76	2.41	0.09		2.98	5.07	0.47
Lin et al., 2017, PHD's Dissertation				40.6791	40.6791	120.634	120.634				S7027	Trachy dacite				155											63.01	0.63		15.16				4.61	3.34	1.62	0.06		4.51	4.03	0.25
Lin et al., 2017, PHD's Dissertation				40.6791	40.6791	120.634	120.634				S7028	Trachy andensite				155											56.75	0.91		17.95				7.92	5.06	3.14	0.09		1.55	4.4	0.35
Lin et al., 2017, PHD's Dissertation				40.6791	40.6791	120.634	120.634				S7034-1	Trachy andensite				155											56.31	1.02		17.62				9.84	4.48	2.03	0.12		2.06	3.7	0.51
Lin et al., 2017, PHD's Dissertation				40.7011	40.7011	120.755	120.755				S7035	Trachy andensite				157											59.62	0.79		17.31				8.2	2.16	2.31	0.08		3.21	4.45	0.37
Lin et al., 2017, PHD's Dissertation				40.6791	40.6791	120.634	120.634				S4013	Rhyolite				155											75.95	0.14		12.85				0.97	0.52	0	0		5.29	3.65	0.02
Lin et al., 2017, PHD's Dissertation				40.6791	40.6791	120.634	120.634				S4017	Rhyolite				155											75.53	0.14		12.92				1.45	0.51	0	0.03		5.31	3.64	0.02
Lin et al., 2017, PHD's Dissertation				40.6791	40.6791	120.634	120.634				S4038	Rhyolite				155											76.01	0.14		12.84				1.02	0.55	0	0.04		5.36	3.5	0.02
Lin et al., 2017, PHD's Dissertation				40.6622	40.6622	120.619	120.619				S4047	Rhyolite				159.6											76.1	0.14		12.86				1.2	0.41	0	0.02		5.01	3.67	0.02
Lin et al., 2017, PHD's Dissertation				40.6983	40.6983	120.623	120.623				S4049	Rhyolite				157.6											75.79	0.14		12.9				1.15	0.58	0	0.03		5.25	3.79	0.02
Lin et al., 2017, PHD's Dissertation				40.6575	40.6575	120.559	120.559				S4073	Rhyolite				149											75.68	0.14		13.05				1.08	0.36	0.17	0.03		5.49	3.42	0.03
Lin et al., 2017, PHD's Dissertation				40.6791	40.6791	120.634	120.634				S7038-1	Rhyolite				155											75.58	0.14		12.94				0.98	0.33	0.17	0.01		5.35	3.44	0.02
Lin et al., 2017, PHD's Dissertation				40.8333	40.8333	120.5	120.5				S7123	Trachy andensite				124											52.16	2.01		15.67				8.7	7.64	5.11	0.14		2.88	3.85	0.88
Lin et al., 2017, PHD's Dissertation				40.8333	40.8333	120.5	120.5				S7125	Trachy andensite				124											54.38	1.19		15.35				6.45	10.67	1.64	0.76		3.74	4.33	0.75
Lin et al., 2017, PHD's Dissertation				40.8333	40.8333	120.5	120.5				N07-1	Trachy andensite				124											54.61	1.29		16.93				8.43	5.53	2.85	0.16		3.98	4.45	0.83
Lin et al., 2017, PHD's Dissertation				40.8333	40.8333	120.5	120.5				N08-1	Trachy andensite				124											55.36	1.18		15.65				7.45	7.75	2.72	0.18		3.97	4.19	0.7
Lin et al., 2017, PHD's Dissertation				40.8333	40.8333	120.5	120.5				WH3033	Trachy andensite				124											58.51	1.21		17.55				6.77	3.48	0.91	0.09		5.18	4.39	1.16
Lin et al., 2017, PHD's Dissertation				40.8333	40.8333	120.5	120.5				WH4028	Trachy andensite				124											59.84	0.66		18.94				6.22	2.45	1.38	0.09		3.14	6.23	0.35
Lin et al., 2017, PHD's Dissertation				40.8333	40.8333	120.5	120.5				WH4029	Trachy andensite				124											57.88	1.19		17.38				6.71	4.42	2.11	0.18		3.81	4.8	0.78
Lin et al., 2017, PHD's Dissertation				40.9431	40.9431	120.234	120.234				STTW-11	Trachy andensite				125											57.61	1.22		18.76				7.33	3.43	1.34	0.09		3.37	5.52	0.49
Lin et al., 2017, PHD's Dissertation				40.8333	40.8333	120.5	120.5				WH4027	Trachy dacite				124											65.42	0.49		15.67				5.45	1.41	0.4	0.13		5.45	4.78	0.19
Lin et al., 2017, PHD's Dissertation				40.8333	40.8333	120.5	120.5				S6120	Trachy dacite				124											66.4	0.5		16.21				3	0.79	0.42	0.09		6.76	5.37	0.12
Lin et al., 2017, PHD's Dissertation				40.8333	40.8333	120.5	120.5				WH4026	Trachy dacite				124											64.29	0.5		16.17				5.42	1.93	0.23	0.1		5.28	5.27	0.19
Lin et al., 2017, PHD's Dissertation				40.9203	40.9203	120.224	120.224				YX-02	Trachy andensite				123.2											60.11	0.86		15.91				7.57	5.81	1.51	0.16		3.08	3.8	0.36
Lin et al., 2017, PHD's Dissertation				40.8333	40.8333	120.5	120.5				S7124-2	Trachy andensite				124											58.66	1.2		15.89				7.74	4.82	1.87	0.07		3.97	4.18	0.74
Lin et al., 2017, PHD's Dissertation				40.8333	40.8333	120.5	120.5				S6110	Trachy andensite				124											62.84	0.7		17.17				4.28	1.82	0.72	0.11		5.86	5.69	0.34
Lin et al., 2017, PHD's Dissertation				40.8333	40.8333	120.5	120.5				S7120	Trachy andensite				124											59.58	0.78		17.52				5.84	5.63	2.41	0.12		2.77	4.35	0.33
Lin et al., 2017, PHD's Dissertation				40.8333	40.8333	120.5	120.5				S7080	Trachy andensite				124											58.38	0.86		16.9				5.79	3.45	2.11	0.07		3.31	5.21	0.29
Lin et al., 2017, PHD's Dissertation				40.8333	40.8333	120.5	120.5				WH1037	Trachy andensite				124											58.36	0.86		16.44				5.87	3.13	2.92	0.08		3.94	4.85	0.39
Lin et al., 2017, PHD's Dissertation				40.8333	40.8333	120.5	120.5				S6172	Trachy dacite				124											67.6	0.52		16.08				3.25	1.83	0.3	0.03		4.44	4.83	0.22
Lin et al., 2017, PHD's Dissertation				40.8333	40.8333	120.5	120.5				S6168	Trachy dacite				124											67.97	0.46		16.03				2.94	1.88	0.35	0.05		4.51	5.14	0.18
Lin et al., 2017, PHD's Dissertation				40.8333	40.8333	120.5	120.5				S6169	Trachy dacite				124											66.8	0.51		15.99				3.12	1.93	0.43	0.07		4.46	5.01	0.21
Lin et al., 2017, PHD's Dissertation				40.8333	40.8333	120.5	120.5				S7088	Trachy dacite				124											66	0.53		16.48				3.01	1.78	0.33	0.05		4.56	4.62	0.22
Lin et al., 2017, PHD's Dissertation				40.8333	40.8333	120.5	120.5				WH1007	Basalt				124											51.9	1.75		15.55				10.44	6.39	6.1	0.16		2.25	3.68	0.61
Lin et al., 2017, PHD's Dissertation				40.8333	40.8333	120.5	120.5				WH1009	Trachy andensite				124											53.51	1.35		15.75				9.3	3.74	5.56	0.18		4.29	4.37	0.9
Lin et al., 2017, PHD's Dissertation				40.8333	40.8333	120.5	120.5				WH1008	Trachy andensite				124											54.66	1.2		16.07				8.23	5.78	4.78	0.1		2.52	5.02	0.72
Lin et al., 2017, PHD's Dissertation				40.8333	40.8333	120.5	120.5				WH2001	Trachy andensite				124											56.53	1.18		16.52				7.12	3.75	4.25	0.11		4.66	4.62	0.47
Lin et al., 2017, PHD's Dissertation				40.8333	40.8333	120.5	120.5				WH1011	Trachy andensite				124											59.61	0.74		16.63				6	2.29	3.63	0.14		2.74	7.07	0.48
Lin et al., 2017, PHD's Dissertation				40.8333	40.8333	120.5	120.5				WH2006	Trachy andensite				124											59.82	0.7		16.56				5.81	3.22	3.03	0.11		3.33	6.32	0.45
Lin et al., 2017, PHD's Dissertation				40.8333	40.8333	120.5	120.5				WH2005	Trachy andensite				124											60.36	0.69		16.5				5.69	2.27	3.28	0.11		2.48	7.54	0.45
Lin et al., 2017, PHD's Dissertation				40.8333	40.8333	120.5	120.5				WH1012	Trachy andensite				124											61.19	0.67		16.12				5.55	3.32	2.78	0.12		2.92	6.28	0.42
Lin et al., 2017, PHD's Dissertation				40.8333	40.8333	120.5	120.5				WH2004	Trachy andensite				124											62.61	0.77		17.23				6.48	1.02	0.47	0.11		2.17	7.91	0.51
Lin et al., 2017, PHD's Dissertation				40.8333	40.8333	120.5	120.5				S7056	Basalt				124											51.31	2.73		16.7				11.76	6.27	2.92	0.19		2.14	4.14	0.52
Lin et al., 2017, PHD's Dissertation				40.8333	40.8333	120.5	120.5				S7058	Basalt				124											48.48	2.26		16.08				13.12	8.64	4.76	0.18		1.3	3.35	0.38
Lin et al., 2017, PHD's Dissertation				40.8333	40.8333	120.5	120.5				S7065	Basalt				124											50.09	2.14		14.59				11.85	8.74	6.42	0.17		1.18	3.14	0.35
Lin et al., 2017, PHD's Dissertation				40.8333	40.8333	120.5	120.5				S6078	Basalt				124											46.41	2.93		13.55				17.2	8.22	5.16	0.2		1.07	2.92	0.41
Lin et al., 2017, PHD's Dissertation				40.8333	40.8333	120.5	120.5				S4151	Basalt				124											51.41	2.31		16.3				13.12	4.93	2.64	0.14		2.76	4.38	0.55
Lin et al., 2017, PHD's Dissertation				40.8333	40.8333	120.5	120.5				S6084	Basalt				124											48.96	1.68		14.53				10.69	7.52	5.74	0.15		4.11	4.09	1.33
Lin et al., 2017, PHD's Dissertation				40.8333	40.8333	120.5	120.5				S6086	Basalt				124											51.4	2		14.77				10.44	7.8	5.32	0.13		2.38	3.47	1.13
Lin et al., 2017, PHD's Dissertation				40.8333	40.8333	120.5	120.5				S6076	Basalt				124											52.45	1.81		12.33				11.07	7.46	7.04	0.13		2.46	3.53	0.5
Lin et al., 2017, PHD's Dissertation				40.8333	40.8333	120.5	120.5				S7084	Trachy andensite				124											57.57	1.05		16.55				6.52	4.18	2.28	0.06		2.76	4.19	0.44
Lin et al., 2017, PHD's Dissertation				40.8333	40.8333	120.5	120.5				S4149	Coarse andrite				124											53.75	1.47		14.71				9.28	6.45	4.89	0.09		3.52	3.92	0.89
Lin et al., 2017, PHD's Dissertation				40.8333	40.8333	120.5	120.5				S6087	Trachy andensite				124											56.59	1.2		17.22				7.38	3.65	2.67	0.1		4.58	5.1	0.7
Lin et al., 2017, PHD's Dissertation				40.8394	40.8394	120.436	120.436				YX-05	Trachy dacite				124											66.57	0.46		15.32				4.88	3.52	1.39	0.05		2.88	4.19	0.2
Lin et al., 2017, PHD's Dissertation				40.8522	40.8522	120.424	120.424				STTW-09	Trachy dacite				124											64.39	0.63		15.37				4.31	3.66	2.64	0.06		3.68	4.31	0.47
Lin et al., 2017, PHD's Dissertation				40.8333	40.8333	120.5	120.5				S4245	Trachy andensite				124											60.11	0.9		15.86				6.56	2.76	1.96	0.06		3.53	5.65	0.42
Lin et al., 2017, PHD's Dissertation				40.8333	40.8333	120.5	120.5				S6159	Trachy dacite				124											64.31	0.63		16.78				5.87	2.77	0.4	0		2.96	4.27	0.26
Lin et al., 2017, PHD's Dissertation				40.8333	40.8333	120.5	120.5				S7073	Rhyolite				124											72.47	0.11		15.36				0.65	0.34	0.15	0.03		3.01	6.8	0.02
Lin et al., 2017, PHD's Dissertation				40.8333	40.8333	120.5	120.5				S5100	Rhyolite				124											71.4	0.11		13.99				1.19	0.75	0.33	0.08		4.6	4.4	0.02
Lin et al., 2017, PHD's Dissertation				40.9267	40.9267	120.537	120.537				S7077	Rhyolite				123.1											71.52	0.26		14.12				1.94	1.13	0.61	0.04		4.41	2.92	0.1
Liu et al., 2015, PHD's Dissertation				42.0833	42.0833	119.667	119.667				PM113-2-2					122											67.16	0.48		15.34		3.19	1.42	4.29036	2.29	0.88	0.1		4.35	3.48	0.35
Liu et al., 2015, PHD's Dissertation				42.0833	42.0833	119.667	119.667				PM113-3-1					122											67.5	0.41		15.56		2.71	0.79	3.22846	2.17	0.85	0.02		4.64	3.62	0.24
Liu et al., 2015, PHD's Dissertation				42.0833	42.0833	119.667	119.667				PM113-8-1					122											68.78	0.36		15.01		2.08	1.02	2.89158	1.96	0.96	0.06		4.76	3.68	0.22
Liu et al., 2015, PHD's Dissertation				42.056	42.056	119.735	119.735				PM112-3-1					122											69.3	0.33		14.98		1.43	1.71	2.99671	1.78	0.48	0.03		4.68	3.52	0.17
Liu et al., 2015, PHD's Dissertation				42.056	42.056	119.735	119.735				PM112-10-1					122											69.48	0.38		15.89		0.67	1.28	1.88287	1.69	0.24	0.03		5.1	3.82	0.11
Liu et al., 2015, PHD's Dissertation				42.0833	42.0833	119.667	119.667				D2061-1					115											67.38	0.39		14.97		2.72	0.79	3.23746	2.08	0.62	0.06		4.98	3.97	0.24
Liu et al., 2015, PHD's Dissertation				42.0833	42.0833	119.667	119.667				D2062-1					115											68.07	0.38		14.87		2.19	0.79	2.76056	2.06	0.61	0.05		5.09	3.86	0.24
Liu et al., 2015, PHD's Dissertation				42.0833	42.0833	119.667	119.667				D3001-1					115											68.08	0.34		14.91		2.4	0.72	2.87952	1.94	0.5	0.03		5.06	3.67	0.16
Liu et al., 2015, PHD's Dissertation				42.0833	42.0833	119.667	119.667				D3007-1					115											68.34	0.35		14.55		2.47	0.65	2.87251	2.05	0.53	0.03		5.11	3.95	0.18
Liu et al., 2015, PHD's Dissertation				42.0833	42.0833	119.667	119.667				D4071-1					115											67.77	0.41		14.86		2.22	1.11	3.10756	2.25	0.77	0.05		4.85	4.02	0.29
Liu et al., 2015, PHD's Dissertation				42.0833	42.0833	119.667	119.667				D4078-1					115											67.54	0.34		14.77		2.41	0.65	2.81852	1.94	0.73	0.08		5.21	3.37	0.18
Liu et al., 2015, PHD's Dissertation				42.0833	42.0833	119.667	119.667				D2058-1					115											61.86	0.65		16.08		4.06	0.74	4.39319	3.08	0.98	0.07		4.87	4.52	0.48
Liu et al., 2015, PHD's Dissertation				42.0833	42.0833	119.667	119.667				D2059-1					115											62.15	0.66		16.42		3.92	0.83	4.35722	2.45	1.11	0.07		5.21	4.5	0.47
Liu et al., 2015, PHD's Dissertation				42.0833	42.0833	119.667	119.667				D2060-1					114.9											63.43	0.66		16.35		3.22	1.17	4.06736	2.46	0.91	0.06		4.97	4.63	0.46
Liu et al., 2015, PHD's Dissertation				42.085	42.085	119.601	119.601				PM109-2-1					128											71.52	0.26		14.08		1.79	0.77	2.38064	1.43	0.44	0.03		5.36	3.17	0.07
Liu et al., 2015, PHD's Dissertation				42.085	42.085	119.601	119.601				PM109-6-1					128											64.66	0.25		14.21		1.74	0.79	2.35565	7.59	0.39	0.02		5.96	2.92	0.07
Liu et al., 2015, PHD's Dissertation				42.085	42.085	119.601	119.601				PM109-7-1					128											69.79	0.37		14.96		2.03	0.68	2.50659	1.5	0.32	0.02		5.49	3.2	0.17
Liu et al., 2015, PHD's Dissertation				42.085	42.085	119.601	119.601				PM109-8-1					128											70.57	0.29		14.66		1.41	1.02	2.28872	1.64	0.48	0.04		5.19	3.5	0.09
Liu et al., 2015, PHD's Dissertation				42.1253	42.1253	119.615	119.615				PM114-20-1					128											70.18	0.2		13.36		0.53	1.24	1.71689	1.22	3.65	0.02		5.14	2.87	0.08
Liu et al., 2015, PHD's Dissertation				42.1253	42.1253	119.615	119.615				PM114-21-1					128											71.94	0.28		14.13		0.25	2.07	2.29495	1.31	0.42	0.03		5.04	3.23	0.11
Liu et al., 2015, PHD's Dissertation				42.1253	42.1253	119.615	119.615				PM114-22-1					128											67.57	0.32		14.43		1.27	1.44	2.58275	1.93	0.7	0.06		4.67	3.28	0.15
Liu et al., 2015, PHD's Dissertation				42.0833	42.0833	119.667	119.667				D1026-1					124											72.68	0.25		13.03		2.6	0.22	2.55948	1.58	0.34	0.05		4.73	3.44	0.08
Liu et al., 2015, PHD's Dissertation				42.0833	42.0833	119.667	119.667				D1034-1					124											70.32	0.29		14.02		2.73	0.29	2.74645	0.99	0.37	0.05		5.64	3.51	0.1
Liu et al., 2015, PHD's Dissertation				42.0833	42.0833	119.667	119.667				D2081-1					124											70.22	0.33		14.11		2.04	0.65	2.48559	1.58	0.52	0.05		5.15	3.54	0.12
Liu et al., 2015, PHD's Dissertation				42.0833	42.0833	119.667	119.667				D2082-1					124											68.32	0.36		14.64		2.3	0.65	2.71954	1.75	0.83	0.05		5.11	3.55	0.14
Liu et al., 2015, PHD's Dissertation				42.0833	42.0833	119.667	119.667				D2096-1					124											69.43	0.34		14.32		1.76	1.23	2.81365	1.62	0.74	0.05		5.03	3.65	0.23
Liu et al., 2015, PHD's Dissertation				42.0833	42.0833	119.667	119.667				D2097-1					124											69.75	0.34		14.28		1.86	1.08	2.75363	1.66	0.75	0.03		5.15	3.65	0.14
Liu et al., 2015, PHD's Dissertation				42.0833	42.0833	119.667	119.667				D2098-1					124											69.34	0.35		14.12		2.03	1.01	2.83659	1.73	0.85	0.04		5.03	3.67	0.13
Liu et al., 2015, PHD's Dissertation				42.0833	42.0833	119.667	119.667				D2099-1					124											70.33	0.35		13.95		1.73	0.9	2.45665	1.63	0.81	0.04		5.05	3.6	0.13
Liu et al., 2015, PHD's Dissertation				42.0833	42.0833	119.667	119.667				D3012-1					124											71.22	0.23		13.59		1.32	0.9	2.08774	1.4	0.52	0.04		5.52	3.39	0.07
Xiao et al., 2008, Earth Science				42.5417	42.5417	122.867	122.867				ZW01					122.4											62.36	0.65		15.31				4.16607	4.47	3.4	0.09		2.71	4.14	0.25
Xiao et al., 2008, Earth Science				42.5417	42.5417	122.867	122.867				ZW02					122.4											62.61	0.79		17.19				3.24828	4.01	1.13	0.06		3.73	3.96	0.3
Xiao et al., 2008, Earth Science				42.5417	42.5417	122.867	122.867				ZW03					122.4											56.46	0.88		14.6				6.27161	6	5.01	0.1		1.25	3.21	0.22
Xiao et al., 2008, Earth Science				42.5417	42.5417	122.867	122.867				ZW04					122.4											57.47	0.92		15.25				6.47856	6.18	5.12	0.11		2.28	3.51	0.23
Xiao et al., 2008, Earth Science				42.5417	42.5417	122.867	122.867				ZW05					122.4											64.78	0.47		14.79				3.57221	3.89	2.81	0.06		2.08	4.58	0.16
Xiao et al., 2008, Earth Science				42.5417	42.5417	122.867	122.867				ZW06					122.4											65.14	0.47		14.82				3.44623	3.5	2.36	0.05		3.61	3.64	0.16
Xiao et al., 2008, Earth Science				42.5417	42.5417	122.867	122.867				ZW07					122.4											64.52	0.48		14.99				3.55421	3.85	2.88	0.06		2.8	3.87	0.17
Xiao et al., 2008, Earth Science				42.5417	42.5417	122.867	122.867				ZW08					122.4											64.72	0.49		14.8				3.5812	3.79	2.82	0.06		2.37	4.36	0.16
Xiao et al., 2008, Earth Science				42.5417	42.5417	122.867	122.867				ZW09					122.4											64.86	0.48		14.84				3.49122	3.79	2.79	0.06		2.61	4.18	0.16
Xiao et al., 2008, Earth Science				42.5417	42.5417	122.867	122.867				ZW10					122.4											65.07	0.48		14.99				3.48223	3.52	2.32	0.06		3.57	3.77	0.16
Xiao et al., 2008, Earth Science				42.5417	42.5417	122.867	122.867				ZW11					122.4											64.87	0.48		14.91				3.5902	3.8	2.85	0.06		2.66	4.22	0.16
Xiao et al., 2008, Earth Science				42.5417	42.5417	122.867	122.867				ZW12					122.4											64.54	0.48		15.05				3.6172	3.81	2.92	0.07		2.94	3.87	0.16
Xiao et al., 2008, Earth Science				42.5417	42.5417	122.867	122.867				ZW13					122.4											61.98	0.7		15.32				4.88591	3.89	2.18	0.04		3.87	3.18	0.26
Xiao et al., 2008, Earth Science				42.5417	42.5417	122.867	122.867				ZW14					122.4											60.83	0.76		16.42				4.15708	4.75	2.39	0.06		3.48	3.88	0.29
Xiao et al., 2008, Earth Science				42.5417	42.5417	122.867	122.867				ZW15					122.4											60.51	0.74		16.14				4.63397	4.52	2.34	0.06		3.73	3.83	0.28
Xiao et al., 2008, Earth Science				42.5417	42.5417	122.867	122.867				ZW16					122.4											59.98	0.76		16.25				4.83193	5.07	3.38	0.09		2.93	3.95	0.29
Xiao et al., 2008, Earth Science				42.5417	42.5417	122.867	122.867				ZW17					122.4											60.24	0.76		16.12				4.77794	5.05	3.31	0.09		2.67	4.04	0.29
Xiao et al., 2008, Earth Science				42.5417	42.5417	122.867	122.867				ZW18					122.4											60.78	0.74		16.34				4.53499	4.78	2.57	0.1		3.41	3.93	0.29
Xiao et al., 2008, Earth Science				42.5417	42.5417	122.867	122.867				ZW19					122.4											60.34	0.75		16.35				4.30104	4.62	2.48	0.05		3.29	3.82	0.29
Xiao et al., 2008, Earth Science				42.5417	42.5417	122.867	122.867				ZW20					122.4											60.33	0.75		16.47				4.27405	4.58	2.39	0.07		3.3	3.83	0.29
Xiao et al., 2008, Earth Science				42.5417	42.5417	122.867	122.867				ZW21					122.4											71.73	0.23		13.86				1.69162	1.43	0.71	0.02		4.59	3.59	0.08
Xiao et al., 2008, Earth Science				42.5417	42.5417	122.867	122.867				ZW22					122.4											73.25	0.22		13.32				1.57465	1.41	0.61	0.02		4.3	3.59	0.08
Xiao et al., 2008, Earth Science				42.5417	42.5417	122.867	122.867				ZW23					122.4											70.7	0.22		13.45				1.51166	1.38	0.51	0.05		4.06	3.96	0.07
Song et al.,2018, Master's Dissertation		Baita	Tiaojishan Fm.	40.6833	40.6833	120.608	120.608				S4014					165											62.02	0.66		16.57		5.31	1.67	6.44794	2.94	1.88	0.08		3.55	5.23	0.27
Song et al.,2018, Master's Dissertation		Baita	Tiaojishan Fm.	40.6833	40.6833	120.608	120.608				S4034					165											62.22	0.67		16.17		5.26	1.17	5.90295	2.32	1.66	0.08		4.19	5.19	0.27
Song et al.,2018, Master's Dissertation		Baita	Tiaojishan Fm.	40.6833	40.6833	120.608	120.608				S4037					165											64.11	0.65		15.44		5.15	0.33	4.96397	3.02	2.06	0.09		3.76	4.7	0.26
Song et al.,2018, Master's Dissertation		Baita	Tiaojishan Fm.	40.6833	40.6833	120.608	120.608				S4042					165											57.31	0.88		18.36		7.05	1.04	7.38359	1.49	2.4	0.11		2.29	6.51	0.32
Song et al.,2018, Master's Dissertation		Baita	Tiaojishan Fm.	40.6833	40.6833	120.608	120.608				S4044					165											62.95	0.6		15.09		4.68	0.42	4.63106	3.46	1.62	0.06		3.31	4.2	0.23
Song et al.,2018, Master's Dissertation		Baita	Tiaojishan Fm.	40.6833	40.6833	120.608	120.608				S4055					165											60.85	0.82		15.76		8.49	1.46	9.0993	1.21	1.76	0.12		2.61	6.58	0.45
Song et al.,2018, Master's Dissertation		Baita	Tiaojishan Fm.	40.6833	40.6833	120.608	120.608				S4076					165											56.83	0.88		18.6		6.47	2.07	7.89171	2.6	2.15	0.09		4.57	5.96	0.37
Song et al.,2018, Master's Dissertation		Baita	Tiaojishan Fm.	40.6833	40.6833	120.608	120.608				S5037					165											74.97	0.13		13.6		1.31	0.31	1.48874	0.2	0.1	0.07		5.13	3.41	0.03
Song et al.,2018, Master's Dissertation		Baita	Tiaojishan Fm.	40.6833	40.6833	120.608	120.608				S7006					165											57.13	0.85		17.11		3.97	3.13	6.70221	4.67	2.62	0.11		3.78	3.97	0.36
Song et al.,2018, Master's Dissertation		Baita	Tiaojishan Fm.	40.6833	40.6833	120.608	120.608				S7030					165											56.2	0.86		17.36		4.2	3.17	6.94916	5.13	2.89	0.13		3	4.19	0.37
Song et al.,2018, Master's Dissertation		Baita	Tiaojishan Fm.	40.6833	40.6833	120.608	120.608				S7042-1					165											75.65	0.14		13.04		0.78	0.08	0.781844	0.28	0.21	0.03		4.88	3.56	0.02
Song et al.,2018, Master's Dissertation		Baita	Tiaojishan Fm.	40.6833	40.6833	120.608	120.608				S7045					165											75.37	0.19		13.18		0.93	0.09	0.926814	0.23	0.29	0.03		7.49	0.13	0.02
Song et al.,2018, Master's Dissertation		Baita	Tiaojishan Fm.	40.6833	40.6833	120.608	120.608				HS024-1					165											58.91	0.88		17.45		7.82	0.25	7.28644	2.29	0.88	0.16		3.39	6.42	0.36
Song et al.,2018, Master's Dissertation		Baita	Tiaojishan Fm.	40.6833	40.6833	120.608	120.608				HS031-1					165											62	0.78		17.38		6.19	0.61	6.17976	2.29	0.54	0.11		4.19	4.64	0.23
Li et al., 2012, Earth Science			Lanqi Fm.	41.8877	41.8877	120.779	120.779				Lq10					160											58.22	0.88		15.34				7.52233	5.68	3.33	0.09		2.18	3.51	0.22
Li et al., 2012, Earth Science			Lanqi Fm.	41.8877	41.8877	120.779	120.779				Lq9					160											56.99	0.89		15.11				7.96323	6.35	4.22	0.08		1.53	3.35	0.27
Li et al., 2012, Earth Science			Lanqi Fm.	41.8877	41.8877	120.779	120.779				Lq8					160											56.98	1.29		16.6				8.5301	5.12	1.88	0.07		2.62	4.02	0.51
Li et al., 2012, Earth Science			Lanqi Fm.	41.8877	41.8877	120.779	120.779				Lq7					160											57.96	1.1		17.52				7.80127	4.2	1.16	0.08		3.15	5.1	0.61
Li et al., 2012, Earth Science			Lanqi Fm.	41.8877	41.8877	120.779	120.779				Lq6					160											52.68	1.74		17.2				8.5661	6.89	2.64	0.14		2.71	3.85	0.84
Li et al., 2012, Earth Science			Lanqi Fm.	41.8877	41.8877	120.779	120.779				Lq5					160											52.09	1.55		18.98				9.42091	3.12	0.43	0.08		2.09	7.3	0.69
Li et al., 2012, Earth Science			Lanqi Fm.	41.8877	41.8877	120.779	120.779				Lq4					160											52.76	1.72		18.08				8.80904	6.89	2.35	0.09		2.69	3.95	0.84
Li et al., 2012, Earth Science			Lanqi Fm.	41.8877	41.8877	120.779	120.779				Lq3					160											60.99	0.77		17.59				4.58898	3.2	1.58	0.12		4.21	4.32	0.34
Li et al., 2012, Earth Science			Lanqi Fm.	41.8877	41.8877	120.779	120.779				Lq2					160											61.08	0.72		16.5				4.37303	2.76	1.19	0.09		4.18	4.5	0.33
Li et al., 2012, Earth Science			Lanqi Fm.	41.8877	41.8877	120.779	120.779				Lq1					160											58.3	1.57		18.37				5.56976	4.68	0.73	0.13		2.11	4.47	0.64
Zhang et al., 2016, Master's Dissertation		Jianshan	Yixian Fm.	40.5277	40.5277	120.602	120.602				B2333-1					131.5											60.94	0.71		16.81		5.85	0.42	5.68383	2.69	2.21	0.07		3.44	6.2	0.52
Zhang et al., 2016, Master's Dissertation		Jianshan	Yixian Fm.	40.5277	40.5277	120.602	120.602				B2334-1					126											50.06	1.97		15.76		4.89	6.12	10.52	7.64	7.2	0.16		1.68	3.65	0.61
Zhang et al., 2016, Master's Dissertation		Jianshan	Yixian Fm.	40.5277	40.5277	120.602	120.602				JS					129											59	0.72		16.46		5.12	0.97	5.57698	3.88	3.27	0.1		3.03	6.85	0.43
Zhang et al., 2016, Master's Dissertation		Laotan	Yixian Fm.	40.528	40.528	120.662	120.662				B2340					113											63.92	0.9		15.44		4.6	1.35	5.48908	1.75	0.94	0.09		6.43	4.24	0.23
[truncated: 27 more rows]
[truncated: 121 more columns]

## Sheet: Jiaodong Peninsula (JDP)
CITATIONS	TECTONIC SETTING	LOCATION	LOCATION COMMENT	LATITUDE MIN	LATITUDE MAX	LONGITUDE MIN	LONGITUDE MAX	LAND OR SEA	ELEVATION MIN	ELEVATION MAX	SAMPLE NAME	ROCK NAME	MIN. AGE (YRS.)	MAX. AGE (YRS.)	GEOL.	AGE	ERUPTION DAY	ERUPTION MONTH	ERUPTION YEAR	ROCK TEXTURE	ROCK TYPE	DRILL DEPTH MIN	DRILL DEPTHAX	ALTERATION	MINERAL	MATERIAL	SIO2(WT%)	TIO2(WT%)	B2O3(WT%)	AL2O3(WT%)	CR2O3(WT%)	FE2O3(WT%)	FEO(WT%)	FEOT(WT%)	CAO(WT%)	MGO(WT%)	MNO(WT%)	NIO(WT%)	K2O(WT%)	NA2O(WT%)	P2O5(WT%)	H2O(WT%)	H2OP(WT%)	H2OM(WT%)	H2OT(WT%)	CO2(WT%)	CO1(WT%)	F(WT%)	CL(WT%)
[truncated: 401 more rows]
[truncated: 122 more columns]

[truncated: 5 more sheets: Liaodong Peninsula (LDP), Korea Peninsula (KP), Songliao Basin (SB), Zhangguangcai Jiamusi (ZGRJR), Sikhote-Alin (SA)]
