# Supplementary material for: High-elevation orogenic plateau influences ecosystems
Source: Research Square preprint supplement (doi:10.21203/rs.3.rs-5816615/v1), 2025-01-23
Supplement: Supplementary file 5 [file a588f1d0596c1d685dfdc4f0.xlsx]

## Sheet: Published MAT Data
Location	Time (Ma)	Paleolatitude (°)	MAT (℃)	Notes	Reference
Sihetun Area Yanshan Fold Belt	125.7 - 125.5 Ma	~48.6	5.9 ± 1.7	Clumped isotope paleothermometry	Zhang et al., 2021, Geophysical Research Letters
Jiaolai Basin Jiaodong Peninsula	More than 79.6 Ma	~37	21.6 ± 4.9	Clumped isotope paleothermometry	Zhang et al., 2016, Earth and Planetary Science Letters
Songliao Basin	70.7 Ma	~45	28.4 ± 4.6	Clumped isotope paleothermometry	Zhang et al., 2016, Earth and Planetary Science Letters
Yungang-Hunyuan Basin Taihangshan	160 Ma	~37	23 ± 3	Clumped isotope paleothermometry	Wen et al., 2022, GSA Bulletin
Yungang-Hunyuan Basin Taihangshan	113 Ma	~40	18 ± 3	Clumped isotope paleothermometry	Wen et al., 2022, GSA Bulletin
Yungang-Hunyuan Basin Taihangshan	ca. 105 Ma	~40	36 ± 4	Clumped isotope paleothermometry	Wen et al., 2022, GSA Bulletin
South Great Xing'an Range	123.5 ± 3.2 Ma		Less than -7.5	Zircon δ18O isotope	Yang et al., 2013, Scientific Report
Japan	129 - 113 Ma	~43.2	10 ± 4	Apatite phosphate δ18O isotope	Amiot et al., 2011, PNAS
Yanshan Mountains	121 - 101 Ma	~42.1	8 ± 3	Apatite phosphate δ18O isotope	Amiot et al., 2011, PNAS
Yanshan Mountains	121 - 101 Ma	~42.1	9 ± 1	Apatite phosphate δ18O isotope	Amiot et al., 2011, PNAS
Yanshan Mountains	129 - 113 Ma	~41.9	10 ± 4	Apatite phosphate δ18O isotope	Amiot et al., 2011, PNAS
Yanshan Mountains	129 - 101 Ma	~42.1	9 ± 1	Apatite phosphate δ18O isotope	Amiot et al., 2015, JAES
Yanshan Mountains	129 - 101 Ma	~41.9	10 ± 4	Apatite phosphate δ18O isotope	Amiot et al., 2015, JAES

## Sheet: Present-Day Elevation
	Present Day Data
Locations	Min (m)	Max (m)	Mean (m)	STDV (m)	Mean (km)	STDV (km)
EGN NGXR	153	1621	762	221	0.762	0.221
JDP	-19	977	89	118	0.089	0.118
JR	-2	1619	420	240	0.42	0.24
KP	0	1733	154	221	0.154	0.221
LDP	-21	1240	242	204	0.242	0.204
SA	0	1927	667	325	0.667	0.325
SB	116	374	151	31	0.151	0.031
SGXR	240	1987	862	261	0.862	0.261
THM	119	2974	1212	371	1.212	0.371
YSM	-92	2175	870	466	0.87	0.466

## Sheet: Present Day MAT Data
Location	MAT (℃)	Error
STHM	12.375	2.383
NTHM	7.325	3.458
YSM	7.055	3.172
SGXR	2.074	3.03
NGXR+EGN	-1.282	3.011
SB	5.349	1.474
ZGR+JR	4.151	1.723
LDP	8.717	2.737
JDP	13.053	2.839
KP	12.972	3.307
	NAME	LATITUDE	LONGITUDE	ELEVATION	1980	1981	1982	1983	1984	1985	1986	1987	1988	1989	1990	1991	1992	1993	1994	1995	1996	1997	1998	1999	2000	2001	2002	2003	2004	2005	2006	2007	2008	2009	2010	2011	2012	2013	2014	2015	2016	2017	2018	2019	2020	2021	2022	2023	2024
	STHM				12.375	2.3832
4937	SHIJIAZHUANG, CH	38.0667	114.35	104.8	13.4	13.7	14.1	14.3	12.9	12.8	13.5	13.8	13.8	14.1	13.6	13.5	14	14	14.6	14.6	13.9	14.7	15.4	15.2	14.3	14.8	14.9	14	14.6	14.7	15	15.2	14.9	14.7	14.3	14.6	14.2	14.2	15.3	14.9	14.9	15.3	15	15.3	15	15.7	15.1	15.6	14
4940	WUSU, CH	37.7469	112.628	784.86	10.1	10.3	10.8	10.3	9.5	9.9	10	10.4	9.9	10.5	10.5	10.2	10.1	9.7	11	10.5	10.1	11.4	11.7	11.8	10.8	11.5	11.5	10	10.2	11.1	12	12.4	11.1	10.7	10.9	10.4	10.3	11.5	11.4	11.7	11.6	11.9	11.8	12.1	11.6	12.2	11.8	12.3	11.5
4942	JIEXIU, CH	37.0333	111.917	745	10.8	11	11.4	10.9	10.1	10.6	10.8	11.6	10.9	10.9	11	11	10.7	10.5	11.4	11.4	10.7	11.8	12.4	12.6	11.4	12	12.2	11.2	11.8	11.8	12.5	12.1	11.5	11.6	11.9	11.1	11	12.7	12.2	12.8	12.6	13.1	12.9	13.1	12.6	13.3	12.9	12.8	12.6
4943	CANYU NORTHEAST, CH	36.15	111.45	462
4944	CHANG ZHI, CH	36.2	113.117	975
4945	YONGNIAN NORTHWEST, CH	36.8	114.45	60
4949	YUNCHENG, CH	35.1167	111.067	376.5	13.7	14.1	14.1	13.5	13	13.7	14.2	14.4	14	14	14.4	14.4	14.1	13.8	15	14.9	13.8	15.3	15.1	15.7	15	15.5	15.7	13.9	14.7	14.5	15.1	14.8	13.9	14.1	14.4	14.1	14.2	15.6	15	14.7	15.1	15.1	15.1	15	14.6	15.1	15.4	14.5	13.9
4950	GUGUZHAI NW, CH	35.25	113.95	72
5414	XINXIAN, CH	38.4	112.717	900	9	8.7	10.3	8.1	7.9	10.1	8.4	11.7	9.6	12.3	11.5	9.3	-3.8		-3.4
5415	HSIA TAO HUNG SOUTH, CH	38.4	111.833	1370
5417	LISHI, CH	37.5	111.1	951	9	9.1	9.8	9.2	8.3	8.9	8.7	10	8.9	9.9	10	9.7	9.3	8.9	10.1	9.7	9.1	10.7	11	11.1	10.1	10.7	10.7	10.1	10.7	10.8	11.2	10.8	9.9	10.4	10.6	10.1	9.9	11.4	10.9	11.6	11.2	11.4	11.1	11.5	11.1	11.7	11.6	10.9	11
5418	YANGQUAN, CH	37.817	113.567	908	11.1	11.6	12.3	11.1	10.9	12.1	12.7	13.2	11.5	14.3	12.9	10.2		8.4			20.7
5419	YUSHE, CH	37.0667	112.983	1042	9	9.3	9.7	9.2	8.3	8.6	9	9.7	9	9.3	9.3	9.2	9	8.8	9.6	9.4	8.8	10	10.3	10.5	9.7	9.8	10	9.2	9.6	9.6	10.3	9.9	9.1	9.3	9.3	8.9	8.6	10	9.6	9.9	9.9	10.1	10.1	10.6	10	10.4	10.2	9.9	9.3
5420	XINGTAI, CH	37.1833	114.367	184	13.6	13.9	14.4	14.5	13.1	13.3	13.9	14.1	14.1	14.2	14	14	14.3	14.2	15	14.7	14.1	15	15.5	15.4	14.6	15.1	15.2	14.2	14.9	14.9	15.2	15.4	14.9	14.6	14.4	14.4	14.2	14.6	15.6	14.5	14.5	14.9	14.9	15.2	14.9	15.3	14.9	15.1	13.7
5421	ANYANG, CH	36.05	114.133	195.7	14.1	14.3	14.7	14.7	13.4	13.8	14.4	14.7	14.6	14.6	14.5	14.4	14.5	14.3	15.3	15	14.4	15.3	15.7	15.6	14.7	15	14.5	13.5	14.2	14.2	14.7	14.6	14.4	14.1	14	14	14.3	14.5	15.5	15.1	15.5	15.7	15.5	15.7	15.4	15.8	15.3	15.6	14.2
7280	XI XIAN, CH	36.7	110.933	1006	9.3	9.5	9.9	9.2	9.8	10.6	11.2	13.3	9.5	11.9	11.9	8.6
7281	YANGCHENG, CH	35.4833	112.4	659	11.8	12.3	12.3	11.9	11.1	11.6	12.1	12.2	12	11.9	12.3	12	11.8	11.5	12.6	12.6	11.7	13	12.9	13.3	12.3	12.6	12.9	11.9	12.6	12.5	12.9	12.8	12.2	12.6	12.5	12.2	12.2	13.4	13	13	13.2	13.4	13.3	13.5	13.4	13.6	13.4	13.1	12.3
	NTHM				7.325	3.45751
4925	BAITA, CH	40.8514	111.824	1083.86	6.3	6.2	7.1	7	5.8	6.3	6.5	7.6	6.6	7.7	7.6	7.3	7.1	6.7	7.9	6.9	6.6	8	8.5	8.7	7.6	8.2	7.5	6.4	7.2	6.4	7.7	8	6.5	7.3	7	7.3	6.4	7.2	7.8	7.7	7.2	7.9	7.5	7.4	6.9	7.9	7.6	7.8	6.2
4926	JINING, CH	41.0333	113.067	1416	4	4	4.7	4.8	3.6	3.8	4.3	5.5	4.4	5.5	5.3	4.8	4.8	4.5	5.7	5	4.5	5.9	6.4	6.4	4.9	5.7	5.6	4.9	5.5	5.1	5.9	6.3	5.2	5.7	4.9	5	4.5	5.9	6.2	5.7	5.7	6.4	5.9	6	5.5	6.3	6	6	4.5
4931	HEQU, CH	39.3667	111.217	1037	7.6	7.7	8.3	8.1	6.9	7.5	6.9	8.7	7.4	8.3	8.8	8.3	8	7.6	8.9	8.2	7.9	8.8	9.7	9.8	8.7	9.5	9.3	8.4	8.8	8.4	9.4	9.3	8.3	9.1	9.1	8.7	8.3	9.5	9.2	9.7	9.2	9.5	9.2	9.3	9.1	10.1	9.6	9.5	8.7
4932	WUTAI SHAN, CH	38.95	113.517	2210	-4.5	-3.9	-3.1	-3.4	-4.6	-4.3	-3.9	-2.8	-4	-3.1	-2.7	-3.1	-3.3	-3.5	-2.6	-3.6	-3.8	-2.5	2.3	2.8	1.9	2.1	2.5	1.9	2	1.6	2.7	2.8	1.7	2.2	1.6	1.5	1.1	2.8	2.5	2.5	2.4	2.9	2.4	3.1	2.7	3	2.9	3	1.9
4933	YU XIAN, CH	39.8333	114.567	910	6.9	6.7	7.5	7.2	6.3	6.7	6.5	8	7.2	7.9	7.8	7.6	7.4	7.5	8.8	7.9	7.7	8.7	9.7	9.8	8.6	9	9.3	8.2	8.8	8.3	9.5	9.5	8.6	8.6	8.3	8.4	7.9	8.9	9.7	9.3	9.4	9.9	9.4	9.6	9.3	9.9	9.3	8.3	7.1
4936	YUANPING, CH	38.75	112.7	838	8.8	9	9.5	9.3	8.4	8.7	9	9.9	9.3	9.6	10	9.6	9.4	9.2	10.4	10	9.6	10.5	11.2	11.5	10.2	10.8	10.9	10	10.2	10.4	11.2	11	10.1	10.3	10.1	9.9	9.7	10.9	10.9	11	10.9	11.2	10.8	12.5	3.7	6.1	11.3	11.3	10.5
4972	ZHANGJIAKOU, CH	40.7833	114.883	726	8.4	8.5	9.3	9.4	8.3	8.2	8.6	9.3	9.1	9.8	9.3	8.9	8.9	9.1	10	9.2	8.7	10	10.5	10.6	9.3	10	10.2	9.2	9.6	9.1	9.8	10.5	9.4	9.7	8.7	9.3	8	8.8	9.7	9.3	9.1	9.7	9.1	9.4	9.1	9.5	9.1	9.4	8.1
4973	HUAILAI, CH	40.4167	115.5	538	9.4	9.7	10.3	10.2	9.2	9.1	9.5	10.1	10	10.5	10.3	9.9	10	10.3	11.1	10.3	9.9	10.9	11.4	11.4	10.3	10.9	11.2	10.6	10.8	10.5	11	11.5	10.2	10.4	9.2	10	9.4	10.1	10.9	10.6	10.5	11.1	10.5	11.1	10.6	11.1	10.7	11	9.6
5411	YOU YU, CH	40.167	112.333	1212	4.2	3.8	4.4	3.8	3.6	5.3	4.6	6	3.9	7.7	6.9	5.2	-14.7	4.4	5.1			19.4
5412	DATONG, CH	40.0833	113.417	1054	6.8	6.8	7.6	7.5	6.3	6.7	6.6	8.1	6.9	7.9	7.9	7.4	7.3	7.1	8.1	7.3	7.2	8.2	9.2	9.3	7.8	8.3	8.4	7.6	8.1	7.6	8.7	8.8	7.8	8.2	8	7.8	7.1	7.5	7.8	7.8	7.6	8.1	7.6	7.6	7.5	8.2	7.6	7.5	6.6
	SB				5.349	1.47442
5386	MING SHUI, CH	47.25	125.883	259	2	4.4	5.9	2.2	3.2	6	6.3	4.1	3.8	5.9	5.7	2.3
4860	SANJIAZI, CH	47.2396	123.918	145.38	3.2	4	4.8	3.9	3.1	3.3	3.9	3.1	4.4	5	5.1	4.4	4.2	4.7	4.7	5.4	4.5	5.3	5.5	4.6	4.4	4.6	4.7	5.3	5	4.2	4.1	5.9	5.6	3.9	3.6	4.4	3.6	3.8	5.2	5.3	4.3	5.1	5.3	5.6	5.3	5.5	4.9	4.6	2.9
4863	QARSAN SOUTHEAST, CH	46.217	122.05	273
4864	ANDA, CH	46.3833	125.317	150	3	3.9	5.1	4.1	3.4	3.2	3.9	3.2	4.2	5	5.4	4.6	4.5	4.5	4.7	5.6	4.8	5.5	5.4	4.6	4.2	4.5	4.9	5.6	5.3	4.2	4.5	6.1	5.6	3.9	3.7	4.6	4	4.1	5.3	5.5	4.6	5.6	5.3	5.9	5.5	5.6	5.2	5.1	3
4867	BAICHENG NORTHEAST, CH	45.633	122.85	151
4868	QIAN GORLOS, CH	45.0833	124.867	136	4.6	5	6.2	5.6	4.8	4.5	5.2	4.7	5.7	6.3	6.6	5.8	5.8	6	6.2	6.7	6.1	7	7.1	6.1	4.9	5.4	6.2	6.6	6.6	5.2	6	7.3	6.9	5.5	4.8	5.4	4.9	5.3	6.6	6.7	6	6.7	6.5	7.1	6.4	6.5	6.1	6.3	4.1
4954	CHANGLING, CH	44.25	123.967	190	5	5.4	6.6	6.1	5.2	4.8	5.4	5.1	6.2	6.8	7	5.9	6.2	6.3	6.8	6.9	6.2	7	7.3	6.4	5.8	6.2	7	7.1	7.1	5.8	6.6	7.8	7.4	6.4	5.6	6.4	5.4	5.7	7.3	7.3	6.7	7.5	7.2	7.9	7.2	7.5	7	7.3	5.1
5385	SAN CHEN FANG, CH	47.783	124.167	146	2.8	4.3	4.9	2.4	2.9	3.9	4.4	4.2	4.1	5.8	5	2
5423	KAITONG TONGYU, CH	44.8	123.083	152	5.5	7.5	8.7	5.5	5.1	8	8.6	8.3	7.6	9.7	8.6	6.3
5424	WU CHAI CHAN, CH	44.967	125.683	240	3.2	6	6.4	5	5	7.3	5.3	6.1	6.1	7.5	6.5	5.3
7270	TAILAI, CH	46.4	123.45	150	4.3	5.1	6	5	4.3	4.6	5.2	4.1	5.5	6.1	5.9	5.4	5.5	5.6	5.8	6.4	5.4	6.3	6.4	5.6	5.2	5.5	5.9	6.4	6.3	5.4	5.4	6.8	6.6	5.1	4.3	5.3	4.1	4.4	5.7	5.7	5.1	6.1	5.8	8.3	-5.1	-1	5.5	6.1	3.9
	KP				12.972	3.30714
8172	MANGILSAN KOR AFB, KS	36.933	126.45	302
7622	SV RI SAN, KS	37.35	126.917	406	11.3	12	13.4	13.6	12.2	12.2	11.5	12.4	12.4	14.2				8.5	12	10.6	10.9	11.2	11.5	11.1	10.9	12.3	1.9		15.2	10
7693	OSAN, KS	37.0333	126.75	12.2
7725	INCHEON INTERNATIONAL AIRPORT, KS	37.4667	126.433	7
7939	SANGJU, KS	36.417	128.167	150	14.1				16.5	15	15.9	14.8	15.9	15.6	15.4	14.9	22.8	16.1	15.8	14.8	14.2	14.5	15.1	15.1	14.2	17.9	6.7		19
7999	CHINHAE KOR ARMY, KS	35.133	128.7	4	14	14.6	16.8
5979	CHANGGAI GAP, KS	36.083	129.567	21
6011	CHANGGAI GAP ROK K 3, KS	36.0833	129.567	21
4753	CHUPUNGNYEONG, KS	36.2167	127.983	245	10.7	11.2	12	11.9	11.3	11.4	11	11.6	11.4	12.2	12.4	11.6	11.8	11.2	12.8	11.5	11.4	11.9	12.5	12.1	11.4	11.9	11.8	11.5	12.3	11.4	11.7	11.8	12	12	11.6	11.6	11.2	11.8	11.8	12.2	12.4	12	12	12.5	12.1	12.3	12.1	12.8	10.6
4165	YEONGDONGRI, KS	37.783	126.85	24	9.6	9.9	-4
4166	CAMP CASEY TONGDUCH, KS	37.9167	127.05	60	11.7	11.2	12.7	12.6	12.2	12.3	11.9	12.5	11.6	12.2	11.9	11.5	12.4	12.8	14.9	13.7	9.7
4167	OSAN AB, KS	37.0906	127.03	11.58	10.3	10.8	11.9	11.5	10.9	11.5	10.9	11.9	11.9	13.1	13	12	11.7	11.3	12.9	11.7	12.9	13.1	13.5	12	11.9	12.3	11.7	11.8	12.2	10.8	12.2	12.4	12	11.8	11.7	11.4	11.5	12	12.5	12.9	13.1	12.8	12.3	12.8	12.6	13	12.4	13.5	11.3
4168	GWANGJU, KS	35.1264	126.809	11.88	11.9	12.6	13.5	13.3	13	14	12.8	13.3	13.3	13.8	14.8	16.5	16.3	12.8	14	13.1	13	13.9	15.1	14.2	14.6	15.8	11.9		17.7	13.6		11.6	11.9	16.6	20.5		22.7	15.3	0.3		5.7	19.4	27.5	7.5	15.6		19.8	20.9
3082	SEOUL CITY, KS	37.5667	126.967	87	10.8	11.3	12.5	12.4	11.6	11.6	11.3	12	12.1	13	12.8	12.4	12.5	12.1	13.6	12.2	12.3	12.9	13.8	13.3	12.6	12.8	12.9	12.9	13.3	12.1	13.1	13.2	13	12.9	12.1	12.1	12.3	12.6	13.4	13.6	13.6	13.1	13	13.6	13.3	13.8	13.3	14.1	11.7
3083	DAEGU AB, KS	35.8941	128.659	35.35	12.3	12.6	13.6	13	12.8	13.9	12.9	13.4	13.1	13.7	14.4	13.3		12.7	14.4	13.4	13.1	13.5	15.1	14.2	14.1	15.7	11.8	13.7	14.4	13.8	13.8	14.4	14	14.2	13.7	13.5	13.4	14.3	14.1	14.3	14.6	14.3	14	14.8	14.5	14.7	14.7	15.1	12.7
3625	HYUN NI KOR ARMY, KS	37.95	128.317	274	8.6	9.1	11.6
3626	CHUNCHEON, KS	37.9	127.733	78	9.9	10	11.1	11.2	10.6	10.9	10.4	11	10.7	12.2	11.5	11	11.2	10.9	11.8	10.4	10.5	11	12.2	11.5	11.1	11.2	11.6	11.3	12	11.1	11.6	11.7	11.4	11.5	11	10.7	10.7	11.2	12.2	12.5	12.5	11.8	11.7	12.4	12.2	12.5	12	12.5	10.3
3627	BAENGNYEONGDO AB, KS	37.9333	124.667	171	9.5	10.2	11.3	11.2	10.3	10.8	10.2	10.2	10.6	11.3	11.1	9.9	14.8	11.2	11.9	11.1	10.7	11.7	12	12.1	10.8	13.3	2.8		16	10.4												16.3	24.4	6.5	11.4	10.2	14.3	12.6	10.2
3628	DONGHAE RADAR, KS	37.5	129.133	37	11.9	11.4	12.9	12.3	13.2	13.6	13.3	13.1	13.5	14.9	15.3	15	14.5	12	13.6	12.5	11.6	12.7	13.4	13	12.6	12.7	11.9	11.8	13.3	12.1	12.4	13.3	13.3	13.4	12.6	12.2	12.3	13.3	13.4	13.9	14.2	14.1	13.2	13.4	13	13.6	13.8	14.5	11.6
3629	GANGNEUNG, KS	37.7536	128.944	10.66	11.4	11.3	12.4	12	11.4	12.8	11.3	12.7	12.5	12.7	13	12.3	15	11.6	13.1	12.2	11.3	12.5	13.4	13.2	12.9	14.6	10.6		16.7	12.4			18.1	19.3								17.9	26.6	8.1	13.8	12.6	15.6	14.7	9.9
3630	WONJU AB, KS	38.2333	127.967	105.5	9.5	9.6	11	10.9	10.3	11.5	10.5	11	10.8	11.6	11.8	11.5	14.4	9					-4.5
3631	SUWON, KS	37.2394	127.007	26.82	10.2	10.4	12	11.7	11.2	12.2	11.2	11.6	11.6	12.3	12.7	12.3	15.9	12	13.1	12.1	12.2	13	13.8	13.6	12.8	15.1	11.8		17.2	12.1			19.9	20.6								18	27.1	5.6	12.9	12.6	15.3	14.2	8.3
3632	PYONGTAEK, KS	36.9667	127.033	15.5	10.3	10.5	12	12.1	11.3	11.6	10.9	11.6	11.3	12.3	14	11.7	11.9	11.3	12.6	11.5	11.4	11.8	12.9	12.4						11.8	12.5	12.8	12.4	12.3	12.1	11.8	11.8	12.1	12.7	13.2	13.4	12.8	12.7	13.4	13.1	13.6	12.9	13.8	11.6
3633	CHEONGJU, KS	36.6333	127.45	59	10.6	11	12.2	12.2	11.5	12	11.3	12.1	11.8	12.7	12.9	12.1	12.4	11.9	13.4	12.1	12.2	12.7	13.6	13.1	12.3	13	12.8	12.7	13.4	12.6	13.3	13.7	13.4	13	13.1	12.8	12.7	13.3	13.9	14.1	13.9	13.5	13.6	14.2	14	14.4	14	14.9	12.5
3634	ANMYEONDO, KS	36.5167	126.317	43	11.2	11.8	12.8	12.3	11.9	12.8	12.1	9.5	16.2	-1.7	24.6	14.3
3635	KUNSAN, KS	35.9038	126.616	8.8	12.4	12.3	13.7	13.7	12.8	12.7	12.8	13	13.3	13.5	13.9	1.1	13.6	13.4	14	12.9	12.5	13.1	13.8	13.1						13.5	13.3	13.8	13.2	13	12.8	12.3	12.5	12.9	13.2	13.8	13.9	13.2	13.3	13.6	13.5	14.2	13.6	14.1	11.8
3636	JEJU, KS	33.5167	126.533	23	14.6	15	15.4	15.6	14.8	15.4	14.7	15.5	15.2	15.7	16.4	15.5	15.9	15.1	16.5	15.6	15.7	16.4	17	16.1	15.7	16.1	15.9	15.8	16.5	16.3	16.3	16.4	16	16	15.7	15.6	15.7	16.5	16.3	16.7	17	16.8	16.7	16.9	16.7	17.5	17.1	17.5	14.5
4347	TAESONG SAN, KS	38.2	127.55	1182														3.5	-7.2	9	5.3	6.7	6.4	6.5	5.2	8.4	-2.9		10	4.9												10.1	20
4348	WONJU, KS	37.4381	127.96	100.27									1.8	11.8	11.8	11.2	11.2	11	12.3	10.8	10.9	11.2	12.4	11.8	11.2	11.4	11.7	11.7	12.3	11.3	12.2	12.4	12.2	12.3	12.1	11.8	11.5	11.9	12.8	13.6	13.4	12.1	12.5	12.7	11.7	12.5	12	12.5	11.6
4349	GIMHAE INTERNATIONAL, KS	35.1795	128.938	1.82	13	13.3	14.1	13.9	13.5	13.8	13.1	13.5	13.4	14.3	14.8	13.8	14.2	14	15.2	13.6	13.6	14.5	15.4	14.5	14.4	14.7	14.7	14.8	15.5	13.5	14.3	14.8	14.5	14.6	14.4	14	14.1	14.9	14.7	15	15.3	15.1	14.9	15.3	15.1	16.1	15.8	15.5	12
4350	MOSULPO KOR AFB, KS	33.2	126.267	27	14.4	14.9	15.6	15.6	15.2	16.3	14.3	14.4	14.4	14.8	15.4	13.6	18.3	17.7	15.4	14.3	14.6	15	15.7	14.8	13.3	16.5	7.6		19.1	14.1												20.2	26.8	11.7	15.1	14.8
9576	SOKCHO, KS	38.2509	128.565	22.9	11.5	11.2	12.3	11.8	11.2	11.9	10.6	12.3	12.3	12.2	12.4	11.9	12.4	11.7	13.2	12.2	11.5	12.7	13	13	12	12.2	12	11.7	13.2	12	12	13	13.1	12.8	12.4	12.1	12.1	12.9	13.2	12.7	12.8	13.1	12.7	13.8	13.3	13.3	12.9	13.6	10.5
9578	GANGNEUNG, KS	37.7709	128.868	26.1	12.2	12.1	13.1	12.7	11.9	12.7	11.7	13.2	12.8	13.5	13.6	13.1	13.2	12.4	14.1	13.2	12.5	13.5	14.1	14	13.5	13.4	13.2	12.7	14.1	13	13.2	13.9	14	13.4	13.1	12.6	12.7	13.7	13.8	14	13.8	14	13.7	14.8	14.3	14.6	14.8	15.5	12.2
9579	H 264 HELIPORT, KS	37.5215	126.979	12.19	12.7	12.5	13.5	13.5	8.9	16.7	11.7	12.4	12.7	13.3	13.8	12.9	14	13.4	14.9	13.9	13.2	13.7	16.9	17	16.1	13	14.4	14.7	0.3															15	13	10.9
9580	KOON NI RANGE, KS	37.0333	126.75	15
9581	INCHEON, KS	37.4667	126.633	70	10.5	10.8	12	11.9	11.2	11.3	11	11.5	11.8	12.5	12.4	11.9	12	11.5	13	11.8	11.6	12.2	13.2	12.7	12.7	12.9	13.1	12.6	12.9	12.1	12.7	12.9	12.8	12.6	12.3	12	12.1	11.9	12.8	13.2	13.3	12.6	12.6	13.3	12.9	13.5	12.6	13.5	10.6
9582	ULLEUNGDO, KS	37.4833	130.9	220	11.2	11.4	12.6	12.4	11.5	12.1	11.2	12.4	12.1	12.8	13.3	12.2	12.7	11.8	13.1	12.4	12.2	12.7	13.3	12.9	12.8	12.7	12.3	12.1	13.1	12.3	12.2	13.4	13.1	12.6	12.6	12.1	11.9	12.8	12.8	13.2	13.2	13.1	13	13.8	13.4	13.7	13.6	14.7	11.1
9583	SUWON, KS	37.2667	126.983	35	10.1	10.2	11.6	11.5	10.9	11.3	10.7	11.5	11.4	12.4	12.5	11.8	12	11.6	13.3	12	12.1	12.6	13.5	12.8	12.3	12.1	11.7	12.3	12.9	12	13	12.9	12.9	12.7	12.3	11.9	12.2	12.4	13.1	13.5	13.6	12.7	12.8	13.3	12.9	13.5	12.8	13.4	10.8
9585	SEOUL EAST KOR AFB, KS	37.433	127.117	20
9586	SEOSAN, KS	36.7667	126.5	27	10.9	11	12.1	12	11.4	11.7	11.1	11.7	11.7	12.4	12.5	11.8	12	11.5	12.8	11.8	11.7	12.2	12.9	12.4	11.3	11.8	11.9	12	12.6	11.6	12.2	12.4	12.1	12.3	11.7	11.7	11.5	11.8	12.4	12.8	12.9	12.4	12.4	12.7	12.6	13.2	12.4	13.4	10.6
9587	YEOJU RANGE, KS	37.433	127.633	43	12.4				14.9	13.6	13	13	15.3	14.5	14.1	14.9	22.8	16.5	15.1	13.5	13.8	14.2	14.8	14	13.7	17.1	4.5		18.6	14.1												16.8	25.9	5	13.2	13.2	14.6	14.6	6
9588	TAEJON, KS	36.3	127.4	78	11.1	11.6	12.6	12.6	12	12.3	11.8	12.6	12.4	13.2	13.5	12.6	12.6	12.1	13.1	11.5	11.6	12.1	13.1	12.4	12	12.7	13.3	13.3	13.3	12.1	13.1	13.3	13	12.8	12.7	12.6	12.6	13.1	13.5	14	14	13.4	13.5	13.7	11.8	13.4	13	13.1	11.7
9589	POHANG, KS	36.0333	129.383	3.58	12.6	12.8	13.9	13.6	13.1	13.8	13.1	14.1	13.8	14.5	15.1	14	14.5	13.4	15.4	14.2	13.8	14.7	15.2	14.5	14.6	15	14.3	14	15.1	14.1	14.5	14.7	14.1	14.8	14.7	14.4	14.2	15	14.6	14.9	15.2	15.1	14.9	15.6	15.1	15.2	15.1	15.8	13
9590	POHANG, KS	35.9879	129.42	21.33	12.5	12.7	13.6	13.4	12.8	14.1	12.9	13.8	13.5	14	14.7	9.4	16.1	13	14.7	13.7	13.4	14.3	14.9	14.2	14	15.8	12.5		18.6	14.5		14.7	12.9	20.5	16.5		19.3	8.7	2.6		7.8	19.6	27.2	9.5	16.5		22	21.4
9591	GUNSAN, KS	36.0023	126.763	26.9	11.6	11.9	13	12.9	12.4	12.6	12	12.4	12.6	13.2	13.6	12.8	13	12.3	13.8	12.9	12.5	13	13.8	13.3	12.7	13.4	13.2	12.7	13.1	12.5	13.5	13.3	13.3	13	12.9	12.2	12.3	12.7	13.1	13.4	13.8	13.2	13.3	13.6	13.4	14	13.2	14	11.2
9592	JEON JU, KS	35.8784	127.12	29.26
9593	CAMP WALKER H 805, KS	35.85	128.583	75	14	14.6	15.8	15.2	15	15.1	14.4	15.2	15	15.5	15.8	15.4	15.9	14.9	16.8	15.7	15	-0.4
9594	TAEGU ACC KOR AFB, KS	35.8833	128.617	61	12.6	13	13.8	13.6	13.2	13.5	13	13.7	13.5	14.3	14.7	13.7	14.1	13.4	15.2	14	13.8	14.6	14.9	14.4	14.3	14.9	14.2	13.8	14.9	14.3	14.7	15	14.7	14.9	14.4	14.3	14.1	15	15	14.8	14.7	14.4	14.2	14.9	14.5	14.7	14.8	15.2	12.9
9595	JEONJU, KS	35.8333	127.117	62.6	11.9	12.1	13.1	13.1	12.6	12.8	12.2	12.9	12.9	13.5	14	13.1	13.3	12.6	14.1	12.9	12.8	13.5	14.6	14	13.6	14	13.7	13.4	14.2	13.3	14.1	14	13.9	13.7	13.6	13.2	13.3	13.9	14	14.3	14.4	13.7	14	14.2	14	14.7	14.1	14.9	12.5
9596	ULSAN, KS	35.5935	129.352	13.71	12.7	13.2	13.9	13.7	13.3	13.8	13.1	13.9	13.5	14.2	15	13.8	14.3	13.1	14.9	13.8	13.8	14.5	15.1	14.5	14.3	14.7	14.5	14.3	15.2	14.3	14.6	15	14.2	14.3	14.1	13.8	13.8	14.9	14.7	15	14.8	14.6	14.4	15	15	15	14.8	15.1	12.3
9597	GUMI, KS	36.117	128.317	47	14.1	14.9	15.6	15	14.7	15.8	15.4	8.1
9598	GWANGJU, KS	35.1667	126.9	74	12.4	12.8	13.6	13.6	13.1	13.3	12.8	13.5	13.4	13.9	14.5	13.8	13.7	13.2	14.7	13.4	13.3	14.1	15	14.4	13.5	13.9	13.9	13.6	14.3	13.7	14.2	14.6	14.6	14.7	14.2	13.8	13.7	14.3	14.3	14.7	15.1	14.7	14.7	14.7	14.5	15.2	14.9	15.4	12.9
9599	BUSAN, KS	35.1	129.033	70.96	13.3	13.7	14.4	14.3	13.9	14.3	13.8	14.4	14.2	14.9	15.5	14.4	14.7	14	15.7	14.5	14.5	15.2	15.8	15.1	14.9	15.4	14.7	14.3	14.9	13.9	14.7	15.3	15	15.2	15	14.6	14.6	15.3	15.1	15.5	15.7	15.2	15.1	15.7	15.2	15.8	15.4	16.1	13.3
9600	SACHON ROK K 4, KS	35.0885	128.07	7.6	12.1	12.5	13.2	13	12.7	13.7	12.6	13.1	12.9	13.8	14.3	13.3	16.3	13.1	14	13.1	13.1	13.9	14.4	13.6						13.1		9	12	20.2	19		22.4	9.9	-1.5		5.6	19.3	27.6	7.2	15.8		20.6	19.8
9601	TONGYEONG, KS	34.85	128.433	33.31	13.3	13.6	14.4	14.2	13.8	14.2	13.6	14.2	14.2	14.8	15.2	14.2	14.6	13.9	15	13.9	13.8	14.6	15.4	14.7	14.5	14.8	14.9	15	15.3	13.7	14.7	15.4	15	14.9	14.1	13.8	13.8	14.5	14.7	14.9	15.4	15	14.8	15.3	15	15.7	15.1	15.6	12.6
9602	MOKPO, KS	34.8167	126.383	39	12.8	13.1	13.9	14	13.4	13.5	13.1	13.6	13.8	14.2	14.7	14	14.3	13.6	15	13.9	13.7	14.2	14.8	14.2	13.6	13.9	13.9	13.9	14	13.5	14.1	14.5	14.2	13.8	13.6	13	13.1	13.8	14	14.5	14.8	14.3	14.5	14.4	14	15.2	14.4	15	12.1
9603	YEOSU, KS	34.7333	127.75	67	13	13.4	14.3	14	13.6	13.9	13.4	14	14	14.6	14.8	13.9	14.5	13.8	15.1	14.1	14	14.6	15.4	14.7	14.3	14.9	14.9	14.5	15	13.8	14.4	14.6	14.6	14.6	14.3	14.1	14	14.7	14.7	14.9	15.3	15	15	15.4	15.1	15.8	15.2	15.6	12.8
9604	JEJU INTERNATIONAL, KS	33.5113	126.493	35.96	14.8	15.5	16.1	15.8	14.6	15.3	15	15.8	15.5	15.4	16	15	15.4	14.7	16.1	15.3	15.3	15.9	16.5	15.6	15.5	15.8	15.5	15.5	16	15.5	15.7	16.1	15.7	15.9	15.7	15.3	15.2	16.1	15.8	16	16.4	16.2	16.1	16.2	16.1	16.9	16.4	16.9	14
9605	SEOGWIPO, KS	33.25	126.567	51	15.3	15.8	16.2	16	15.6	16.1	15.6	16.3	16.2	16.6	17.1	16.2	16.6	15.8	17.2	16	16.3	16.8	17.5	16.7	17.2	17.4	17.3	17.4	17.8	16.3	17.2	17.4	16.9	17.2	17	16.7	16.7	17.5	17	16.7	17	17	16.8	17.3	16.8	17.5	17.2	17.7	14.9
9606	JINJU, KS	35.1667	128.033	29.92	12.7	12.3	13	12.9	12.5	12.9	12.3	12.9	12.7	13.4	13.9	13	13.2	12.5	13.8	12.7	12.6	13.4	14.2	13.4	13.4	13.5	13.5	13.3	14	13.3	13.7	14	14	13.8	13.2	13	12.8	13.4	13.3	13.4	13.8	13.6	13.4	14	13.7	14.2	13.9	14.5	11.9
9607	YONG JUNG RI, KS	35.433	126.433	37	0.9
11826	SEOUL AB, KS	37.4458	127.114	28.04	10.2	10.6	11.9	11.6	11.2	12.2	11.2	11.9	11.9	12.7	12.6	11.1	14.8	11.3	13	11.9	12.3	13.2	13.1	13	13	14.8	11.4		16.4	12.1			10	12.5	12.1	11	11.7	12.1	13.3	3.8	7.3	14.7	13.1	13.5	13.5	14.5	13	14	8.7
11827	SINYONGSAN, KS	37.5333	126.967	29	10.8	11.4	12.6	12.3	11.8	12.5	11.9	12.2	12.4	13.4	9.6	12.7	16.2	13.1	14.4	13.2	13.6	13.9	14.5	14.3	14.2	15.9	4.2		18.1
11828	MANGILSAN, KS	36.9333	126.45	84		6	12	11.7	10.9	11.7	11	11.3	11.7	12.2	12	11.1	14.8	11.6	12.3	11.3	11.1	12	12.3	11.6	11	13.2	1.6		15.7	10.3												16.8
12927	YECHEON, KS	36.6319	128.355	107.89	10.9	11.5	12.4	12.1	11.4	12.1	11.1	11.8	11.5	12.1	12.3	11.8	15.2	11.7	12.7	11.7	11.8	12	12.6	12.8	12.8	14.3	10.6		16.6	12.2			18	20.3								16.4	26.7	4.7	12.5	12.3	14.5	13.6	8.7
12981	JINBURYONG TMQ 53P, KS	38.2	128.533	97.84			20.4	8.9					-1.8	16		22
12983	GAPYONG TMQ 53P, KS	37.8667	127.517	56.08	8.2				1.3	11			8.2				19.3	7.7		16.2		16.9	-6
12985	DAEGWALLYEONG TMQ 53P, KS	37.6833	128.767	841.86				12.6							5.3
12986	YEONGJU TMQ 53P, KS	36.8667	128.55	215.8				10	0.9		4.1						18.3	8.1
13465	ULJIN, KS	37	129.417	51.2	11.5	11.3	12.6	12.3	11.4	12.2	11.3	12.5	12.4	13	13.3	12.4	12.8	11.9	13.6	12.6	11.9	13	13.6	13.1	12.6	13.1	12.7	12.5	13.6	12.5	12.7	13.7	13.1	13	12.3	12.1	12	12.8	12.9	13.2	13.3	13.3	13	14	13.4	13.5	13.4	14.2	11.1
13508	GIMHWA TMQ 53P, KS	38.25	127.417	203.91		-3.6		14.8	-0.5		4		6.9					15.5				13.1						25.1
13739	CHAJANG NI K ARMY, KS	37.867	127.183	100
13740	H 207 HELIPORT, KS	37.7192	127.099	71.32	10.3	9.7	12.2	12.6	13.2	13.2	13.4	13.3	12.2	13.7	12.3	12.2	11.4	10.9	12.2	11.2	11.2	11.6	13.9	13.5	13.5	13.7	13.5	14	13.7												18.2
13741	PYORIP SAN, KS	37.783	126.367	248		5	24	7.7						0.7
13742	CHEONGJU INTERNATIONAL, KS	36.7166	127.499	58.21	10	10.4	11.7	11.7	11.2	12.3	11.4	12.2	11.8	12.6	12.8	11.9	14.9	11.9	13.2	12.2	11.6	12	12.7	12.3	11.7	12	11.9	12.4	13.1	12.6	13.2	12.6	12.9	12.7	11.8	11.4	11.4	11.9	12.2	12.8	12.9	12.3	12.4	12.6	12.4	12.8	12.3	13.4	10.8
13743	TAESONG SAN, KS	38.2	127.55	1175			19.2	10.9
13794	INJE SINNAM TMQ 53P, KS	37.9667	128.083	195.99			19.8					10.6	16.2	11.9									13.9
13796	GWANGJUUP TMQ 53P, KS	37.3833	127.3	74.07	18	-3.4		12.7	0.7	7.9				8.1												23.1
13797	MUNSAN TMQ 53P, KS	37.8833	126.767	34.75	17.6			10.3																17	16.5
13798	DAESAN TMQ 53P, KS	36.9833	126.467	39.93		14.7		15.1	5.2								7.6						16	14
13800	GUMI TMQ 53P, KS	36.1167	128.367	42.98	10		7		1.3	13.2		17.7														21
13904	YONG JUNG RI, KS	35.433	126.433	37	16.6			17.3	15.3	15.3	14.7
14025	GONGJU TMQ 53P, KS	36.5	127.2	32.92	1.6	13.8		7.5						-7.4	0.8		12.3	8.6	24.6
14026	SANGJU TMQ 53P, KS	36.4167	128.15	91.74	3.6			1.2	-0.2	6.8					6.3								25.7	21	22.7	20.2
14209	YEONGWOL, KS	37.1833	128.467	237		22.6														10.4	10.2	10.7	11.8	11.2	10.6	10.5	10.4	10.4	11.2	10.5	11.3	11.5	11.4	11.5	11.2	11	10.8	11.3	11.9	12.4	12.4	11.7	11.6	12.2	12	12.2	11.7	12.5	10.6
14210	YEOSU, KS	34.8423	127.617	16.15		23.5							25.8														17.2	7.3	22.6	15.2	15.9	18.5	18.8	18.4	23.1	23.4	22	23.4	20.3		7.6	21.4	29.1	10.9	17.7			25.3
14299	YANGSU RI, KS	37.6	127.35	29.87		10.5
14512	KOTAR RANGE, KS	37.1	128.9	792			11.4	8.1	7.2	8.4	7.5	8	7.6	8.7	9	8.5	11	8.1	9.3	8.6	8.3	8.9	9.7	9.4	9.5	10.2	-0.2		12.8	8.5												12.4	23.1	2.8	9.6	9.2	11	10.8	-0.6
14526	BANGSAN TMQ 53P, KS	38.1167	128.033	220.98			5.3	10.4		26.3			24.3
14531	USAG YONGSAN TMQ 53P, KS	37.5167	126.983	12.19			18.6							2.2									18.2	11.4		10.5	9.3
14532	GWANGJEOK, KS	37.8167	126.983	77.11			20.8															15
14776	ANDONG, KS	36.5667	128.7	141.59				11.1	11.5	11.4	10.8	11.6	11.5	12.4	12.6	11.8	11.9	11.4	13	11.6	11.7	12.3	13	12.5	11.8	11.7	11.9	11.6	12.2	11.3	12.1	12.6	12.5	12.6	12.3	12.2	12.2	12.5	12.5	13	13.2	12.7	12.8	12.9	12.6	12.8	12.7	13.4	11.1
14777	WANDO, KS	34.4	126.7	35				14.7	14	14.1	13.6	14.1	14.1	14.7	15	14.3	14.7	13.9	15	14.1	13.9	14.4	15.2	14.5	13.3	13.6	13.7	13.9	14.7	13.9	14.2	14.4	14.2	14.4	14	13.9	14	14.6	14.5	14.6	15.1	15	14.9	15	14.9	15.6	15.3	15.7	13
14801	GEUMSAN TMQ 53P, KS	36.1167	127.483	101.8				7								18.7						14.3
15221	DAEGU EXERCISE, KS	35.9	128.667	35.36						16.7		17.6	25.5			1.6		21.7	17.9								12.1
15251	MIRYANG TMQ 53P, KS	35.65	128.75	47.85						29.2	20.6	9.4
15693	CHANGWON, KS	35.1702	128.573	36.8								26.9	8.3	15.1	15.6	14.6	14.8	14.2	15.8	14.7	14.5	15.2	15.9	15.1	14.7	15	15	14.8	15.7	14.1	14.6	14.8	14.8	15	14.6	14.3	14.2	15	14.9	14.7	14.9	14.8	14.3	14.7	14.4	15	14.7	15.2	12.8
15694	SONGMU KOR AFB AND, KS	36.567	127.5	79								14.9	12	12.8	12.7	9
15733	USAG WALKER TMQ 53P, KS	35.8333	128.583	74.98								5.4	11.4												14.5	9.2	6.2	18.3
15951	CHEORWON, KS	38.15	127.3	155									0.8	11.1	10.6	10	9.9	9.8	10.9	9.5	9.5	10	11.3	10.7	10.2	10	10.2	10	10.3	9.4	10.5	10.8	10.4	10.5	10.1	9.9	9.7	10.1	11	11.2	11.2	10.6	10.5	11.1	11	11.4	10.6	11.5	9.4
15952	CHEJU DO K 39, KS	33.2	126.267	27.1									11	15.6	16.2	15.3	15.7	15	16.1	15.3	15.3	15.9	16.3	15.4						15.4	15.6	16.2	15.9	15.7	15.7	15.4	15.6	15.5	15.6	15.7	16.2	16.1	16.2	16.2	16.1	17	16.4	16.7	13.8
16157	BAEGADO, KS	37.083	125.967	-999										3.3
16159	YEONPYEONGDO, KS	34.667	125.683	-999										3.3
16189	KOON IN RANGE, KS	37.033	126.75	15										2.8	13.4	12.9	13.5	12.9	14.8	13.3	12.8	13.4	17.1	14.5	12.1	10.6	7.5
16196	SACHANG RI, KS	38.0667	127.517	159.11										5.9	8.9	4.8
16197	HONGCHON, KS	37.6833	127.883	246.89										7.2	9.8	10.6
16198	BURON, KS	37.2	127.75	95.1										5.2	7.2	4.8
16460	CAMP RED CLOUD, KS	37.7522	127.025	64.62											16.6										7.7	4.6	5.9
16955	SEONGMU, KS	36.5682	127.5	78.63												23.9	14.9	11.9	12.8	11.8	11.6	12.1	12.8	12.3	12.4	14.4	2.6		16.8	12.4												16.7	26.5	5.2	12.4	12.2	14.3	13.7	10
17226	DAEGWALLYEONG, KS	37.6833	128.717	844													1.3	5.7	7.4	6.1	6	6.7	7.5	7.1	6.9	7.6	7.6	6.9	7.8	6.6	7	7.6	7.2	7.4	7.3	6.8	6.5	7.6	7.7	8	8.1	7.3	7.3	8.2	7.8	8	7.6	8.6	5.7
17227	JUNGWON AB, KS	37.03	127.885	85.64													14.2	11.9	12.8	11.4	11.2	11.5	13.1	12.6	12.2	13.1	9.8		16.2	12			18	19.6								17.2	26.7	4.1	12.1	11.8	13.9	13.3	9.8
17465	YEONPYEUNGDO, KS	37.7	125.7	91														15.3	2.1	15.8	11.5	12.2	12.8	12.4	11.4	14.5	3.7		16.2	10.7												16.6	24.7	6.1	11.8	10.8	14.6	13	9.9
17466	KEO JIN, KS	38.467	128.467	107														13.9	2.5	15.9	11.6	12.6	12.9	13	12.2	15	4.1		16.9	11.9												16.8	25.4	7.9	13.8	12.7	15.5	14.9	2.3
17467	PYORIPSAN, KS	37.7833	126.367	250														7.8	0.4	14.7	10.7	11.3	11.7	10.8	10.7	13.2	1		14.8	9.6												14.1	24.4	4	10.9	10.6	13	12.6	3.5
17468	PAEKADO, KS	37.0167	126.05	46														15.1	12.7	12.2	11.5	12.5	13.3	12.2	8.5	14.1	2.6		16	10.6												17.7	24.9	7.6	12.3	11.3	15.4	13.5	6.5
17469	WOONG CHEON, KS	36.2	126.55	13														11.6	14.5	13.7	13.2	14	15	14.3	13.5	16.9	4.1		18.7	13.4												18.4	26.9	8.6	13.7	13.2	16.5	15.3	8.4
17470	WHANG RYEONG, KS	37.75	128.667	1407														5	-8.7	7.9	4.4	5.5	5.1	5.1	4.3	8.1	-4		9.4	4.5												8.6	18.5	-1.7	4.3	4.1	7.2	6.1	-3.6
17471	MAESANRI, KS	37.35	127.267	144														8	12.5	11.5	11.5	11.9	12.8	12.4	12.4	14.7	2.4		16.2	11.7												17	27.4	5.4	13	12.9	14.6	8
17914	SEOSAN AB, KS	36.7	126.483	12																12	13.3	12.1	13.2	12.6	12.1	13.8	2.6		16.8
18207	COMMAND POST TANGO, KS	37.5167	126.983	73																	22.5	11.9
18798	CAMP STANLEY TMQ 53P, KS	37.7167	127.1	64.92																				-0.7	23.6	1.7	3.4
18978	KUNSAN AB, KS	35.9038	126.616	8.83																					12.6	12.8	13.2	14	14.3
18979	SACHEON AB, KS	35.0885	128.07	7.62																					13.6	14.5	12.1		17.3
18980	GOSAN, KS	33.2938	126.163	70.9																					15.2	15.6	15.4	15.3	16.2
19483	DONGDUCHEON, KS	37.9	127.067	112																						13.8	11.2	11.2	11.2	10.4	11.3	11.5	11.8	11.7	11	10.8	11.1	11.5	12.1	12.5	12.6	11.9	11.8	12.1	11.8	12.2	11.6	12.5	10.4
19484	BAENGNYEONGDO, KS	37.9661	124.63	36																						9	10.8	10.3	11.7	10.8	11.2	11.6	11.5	11.7	10.9	10.3	10.5	10.7	11.6	12	12	11.9	11.1	12.1	12.2	12.6	11.8	12.6	9.4
19485	CHOCH IWON, KS	36.5667	127.283	25																						14.4	3.5		17	12.7
19486	HEUKSANDO, KS	34.6872	125.451	68.5																						17.1	13.3	13.1	13.5	12.9	13.3	13.5	13.1	13.8	13.3	13	13.6	13.8	14.1	13.6	13.7	13.5	13.9	14	14.1	15.3	14	14.4	11.9
19877	SANGJU, KS	36.4167	128.15	97.57																							14.8	12.4	13	12.3	12.7	12.7	12.7	12.6	12.1	12.1	11.7	12.5	12.7	13.7	13.9	13.4	13.2	13.5	13.1	13.3	13.3	13.9	11.8
20056	PAJU, KS	37.8831	126.766	30																								14.6	11.1	10.3	11.4	11.3	11.1	11	10.7	10.5	10.9	11.1	11.4	11.7	11.7	10.5	10.5	11.3	11.2	11.6	10.8	11.8	9.5
20057	JINDO RADAR, KS	34.4667	126.333	478																								14.9	12.2	11.3	12	12	11.6	11.8	11.6	11.3	11.2	11.7	11.8	11.7	12.4	12.4	12.3	10.5
20388	YANGYANG INTERNATIONAL, KS	38.0613	128.669	73.45																									16.6	12.1	12.4	13.1	12.8	12.5	11.7	12	11.4	12.4	12.8	13.1	13.1	13.3	13.1	14	13.3	13.1	13	13.8	10.9
20389	INCHEON INTERNATIONAL, KS	37.4691	126.451	7.01																									16.2	11.8	12.7	13	12.6	12.4	11.9	11.5	11.7	11.9	12.6	12.7	12.9	12.6	12.5	12.8	12.7	13.4	12.6	13.3	10.3
21162	SANGJU RANGE, KS	36.4	128.283	90.3																										15.3												17.8	27.9	6.8	14.2	13.7	15.8	15.4	5.9
21163	KOREAN AF HQ, KS	37.5	126.917	49																										13.1												19	29.5	7	14	13.6	16.4	15.3	7.1
21164	MOKPO, KS	34.7589	126.38	7.01																										13.7	12.4
21165	SEOSAN AB, KS	36.6833	126.483	12																										11.8
25371	MUAN INTERNATIONAL AIRPORT, KS	34.9833	126.383	16																													17.5	13.9	13.9	13.4	13.6	13.9	13.8	14.2	14.5	13.9	14.1	14.2	14.1	14.8	14.1	14.8	12
26014	ICHEON, KS	37.2667	127.483	90																														12	11.2	11.1	11.2	11.4	12	12.4	12.8	11.8	11.8	12.4	12.5	12.8	12.3	13.1	11.1
26015	CHEONAN, KS	36.7625	127.293	81.5																														12.8	12.3	12	11.9	12.4	12.8	13.1	12.7	11.9	11.9	12.1	12.3	12.6	12.1	13.1	10.8
26016	BORYEONG, KS	36.3333	126.55	18																														13.2	13	12.1	12.2	12.5	13	13.4	13.6	12.8	13	13.3	13.1	13.9	13.1	14	11.2
26017	GUMI, KS	36.1167	128.317	47																														13.9	13.1	12.8	12.6	13.4	13.6	14.1	14.2	13.8	13.6	14.2	13.9	14	14	14.4	12.4
26018	GEOCHANG, KS	35.6667	127.917	225.95																														12.4	11.8	11.7	11.4	12.1	12	12.4	12.8	12.3	12.3	12.8	12.5	12.9	12.7	13	10.6
26019	JEONGEUP, KS	35.55	126.867	39																														14.1	13.7	13	13.1	13.7	13.7	14.2	14.3	13.1	13.2	13.3	13.2	13.9	13.3	14.3	11.9
26020	GOCHANG, KS	35.3489	126.599	55																														13.9	13.6	13.2	13.2	13.7	14	14	14.4	13.4	12.9	13.3	13.3	14	13.4	14.2	11.6
26021	NAMWON, KS	35.4167	127.4	132.52																														12.9	11.7	12	11.9	12.6	12.8	12.9	13.5	12.8	13.1	13.4	13.1	13.5	12.9	13.9	11.7
26022	SUNCHEON, KS	35.0167	127.367	166.9																														13.4	13	12.6	12.4	12.8	12.7	13.3	13.9	12.8	12.8	13.2	13	13.6	13.3	13.6	10.9
26394	SEONGSAN, KS	33.3833	126.867	18																															6.3	15.4	15.4	16	15.7	15.8	16.3	16	15.7	16.1	16	16.8	16.2	16.8	13.9
28391	ULNEUNGDO, KS	37.5	130.867	968																																						11.3	20.3	3.1	7.9	10.8	14.4	13.1	5.6
28629	CHEJU DO K 39, KS	33.2	126.267	27.1																																											18.6	16.7	14.4
	SGXR				2.074	3.02988
4857	BUGT, CH	48.7667	121.917	739	-1.4	-0.7	0.2	0	-1.4	-1.1	-0.2	-1.4	-0.2	0.7	1.1	-0.2	0.4	1.7	0.6	1.4	-0.5	0.3	0.5	-0.3	-0.4	-0.2	0.4	0.6	0.5	-0.3	-0.4	1.6	0.9	-0.3	-0.9	0.2	-0.9	-0.3	0.4	1.1	-0.2	0.6	0.5	1	1.4	0.7	0.3	0.3	-1.7
4858	ZALANTUN, CH	48	122.733	310
4859	ARXAN, CH	47.1667	119.933	997	-3.6	-3.7	-1.8	-2.4	-3.8	-3.4	-2.9	-3.1	-2.5	-1.6	-1.2	-2.6	-1.6	-0.9	-1.3	-1	-2.1	-1.5	-2.8	-1.9	-2.6	-2.7	-1.8	-1.5	-1.5	-2.4	-1.9	-0.3	-1.1	-2	-2.6	-2.3	-2.9	-2.4	-1	-0.5	-1.6	-1.5	-1.2	-0.7	-0.6	-0.4	-1.3	-1.1	-3.6
4866	ULIASTAI, CH	45.5167	116.967	840	1.2	0.5	1.8	2	0.8	0.7	1.2	0.7	1.8	2.7	2.5	1	1.6	1.5	2.2	2.7	1.4	2.7	3.2	3	2.1	2.3	3.3	2.5	3.1	2.5	2.7	4.2	3.3	2.4	1.7	2	1	2	3.5	3.1	2.6	3.4	3.1	3.8	3	3.3	2.6	2.7	0.1
4951	XI UJIMQIN QI, CH	44.5833	117.6	997	1.2	1.1	2.1	2	0.8	0.7	0.9	1.4	2	2.9	2.8	1.7	1.9	1.6	2.5	2.5	1.8	2.8	3.5	3	2	2.5	3	2.9	3.2	2.3	2.2	3.5	2.7	2.3	1.6	1.7	0.7	2.1	3.2	2.8	2.4	3	2.7	3.4	2.6	3	2.2	2.7	0.6
4953	LINDONG, CH	43.9833	119.4	485	5	5.4	6	6.1	4.8	4.3	4.9	5	6	6.4	6.1	5.5	5.5	5.7	6.1	6.3	5.4	6.2	6.6	6.2	5.6	5.7	6.8	7.1	7	6.6	6.9	7.9	7.2	6.5	6	6.7	5.4	6.5	7.5	7.6	7.1	7.5	7.1	7.8	7.1	7.2	6.8	7.4	5.8
4958	LINXI, CH	43.6333	118.033	825.4	4.5	5.1	5.6	5.8	4.4	4	4.6	4.9	5.5	6.1	5.8	4.9	5.2	5.2	6	5.8	5	6	6.4	6.1	5.3	5.7	6.1	6.2	6.1	5.6	5.8	7.1	6.3	5.7	5.2	6.1	4.7	5.1	5.8	5.8	5.4	6	5.7	6.2	5.3	6	5.2	5.8	4.3
7269	TE PO SU K MIAO, CH	46.5	121.367	427	2.7	4	3.6	3	1.9	1.9	2.3	3.2	5.1	3.9	3.8	1.1
9542	HUSHUU SUME SOUTH, MG	47.333	119.033	1067
13908	HAI LAR TUNGSHAN, CH	49.217	119.8	488	-8
14774	KHALKH GOL, MG	47.6167	118.617	688				-9.7	-1.4	-0.8	0.7	-1.4	-0.8	-0.3	1.3	-2.3	-2.6	2.5	1.1	-0.2	0.4	0.6	-6.3	0.2	-0.5	-0.1	0.8	-0.2	0.5	0	0.5	2.2	1.4	-0.2	-0.2	0	-0.9	-0.7	1	1.4	0.5	0.7	0.9	1.9	1.4	1.7	0.9	1.5	-2.7
	NGXR+EGN				-1.282	3.01094
251	NERCHINSKIJ ZAVOD, RS	51.3167	119.617	619	-3.2	-3.1	-1.8	-2.4	-3.2	-3.1	-2	-3.4	-2.2	-1.6	-1	-2.1	-2	-1.7	-1.9	-1.3	-1.5	-4.1	-3.4	-0.3	-19.8	0.1	-2	-3.1	-1.9	-1.4	-4.5	-0.9	-1.1	-3	-2.8	-1.7	-2.9	-2.1	-1	-0.5	-2	-1.2	-1.1	-0.6	-0.6	-1.2	-1.8	-1.6	-4.4
2121	PRIARGUNSK, RS	50.3333	119.067	521.1	-2.7	-2.9	-1.3	-1.8	-3	-2.2	-1.5	-2.9	-1.9	-1.5	-0.3	-1.3	-1.9	-1	-0.8	1.8	-1.3	-4	-1.3	-2.2	-20.1	1.3	-0.6	-1.8	-1.5	-0.7	-1.5	0.1	-0.4	-2.3	-2.5	-1.9	-3.2	-2.4	-1.1	-1.1	-3.5	-1.3	-1	-0.2	-1	-0.7	-1.7	-1.8	-5.1
2122	KAJLASTUJ, RS	49.8333	118.383	550	-1.7	-2.3	-0.1	-0.5	-1.9	-1.3	0.1	-1.3	-0.2	-0.4	0.8	-0.3	1.1	1.4	0.9	1.3	-0.6	-1	5.2	-7.3	18.2	2.2	-0.2	0.1	0	-0.5	-0.5	1.2	-1.1	-1.4	-1.2	-0.6	-1.6	-0.9	0.2	1.3	-0.2	0.2	1.1
4854	HAILAR, CH	49.25	119.7	650	-2	-1.9	-0.4	-1.1	-2.3	-1.6	-0.4	-1.4	-0.7	0	0.8	-0.4	0.3	-0.1	0.5	1.1	-0.3	0	0.8	-0.3	-0.8	0.3	0.6	0.2	0.5	-0.1	-0.3	1.3	0.6	-0.9	-1.1	-1.4	-2.1	-1.6	-0.3	0.6	-0.8	1.8	8.1	-13	-16.7	-5.7	-0.2	-0.8	-3.3
5379	SAN HE, CH	50.5	120.067	671	-4.1	-2.8	-1.3	-3.6	-1.1	-0.4	0.9	-0.3	-1.1	1.4	1.2	-1.2
5380	TULIHE, CH	50.45	121.7	733	-5	-4.8	-4	-4	-4.9	-4.4	-3.8	-5.5	-3.6	-3.1	-2.3	-4.1	-3.5	-3.2	-3.1	-3.4	-4.6	-3.7	-3.1	-4	-4.3	-4.3	-3.2	-3.8	-3.6	-3.8	-4.2	-2.7	-3.1	-4	-4.3	-4	-4.8	-3.8	-3.2	-2.3	-3.8	-3.4	-3.4	-3.4	-2.9	-3	-3.7	-3.6	-6.4
5381	XIAO ERGOU, CH	49.2	123.717	288	1.6	2	1.5	2.4	-0.5	0.2	1.4	-0.5	1	-0.6	4.2	2.1	1	2.6	1.7	2.1	-2.6	-7.2	3.2	4.9	0.9	1.1	1.7	1.8	1.3	0.9	0.2	2.5	2.4	0.9	0.7	1.2	0.3	1.1	1.4	2.5	1	1.7	1.9	2.5	2.3	2.2	1.7	1.6	-0.5
9765	TA HE, CH	52.333	124.8	465	-2.8	-2.1	-1.7	-1.6	-2.8	-2.5	-1.8	-2.3	-0.7	-0.6	0.5	-5.8
9766	XIAO YANG QI, CH	50.8	124.283	549	-0.9	-0.6	0.3	-0.5	-1.1	-0.7	-0.8	-1.2	0.4	1.2	2.1	-1.5
13746	JIU HAI LAI, CH	51.133	124.05	610	-3.8	-0.1	-2.4	-2.7	-1.6	-0.3	1	-1.4	0.8	1.7	1.8	-3.1
	LDP				2.73689	8.717
7284	DA HUO FANG, CH	41.883	124.083	273	7.2	8.3	7.8	7.1	7.2	8.2	9	9.2	7.4	10.3	10.7	7		8.3								-5.5
5435	QINGYUAN, CH	42.0667	124.867	230	5.6	5.9	6.9	6.7	5.8	5.6	5.8	6.1	6.4	7.3	7.4	6.5	6.5	6.3	7.3	6.9	6.5	6.9	8	7.2	6.2	6.6	7.2	7.3	7.3	6.1	7.2	7.8	7.4	6.4	6	6.3	5.8	6.4	7	7.1	6.8	6.9	6.8	7.5	7.3	7.5	6.7	7.4	5.4
4966	MEIHEKOU WEST, CH	42.517	125.633	326
4970	SHENYANG, CH	41.7333	123.517	43	7.8	8.3	9.2	9.2	8.3	8.1	8.3	8.5	9.2	10	8.6	8.1	8.2	8.1	9.1	8.7	8.2	9	9.8	9.2	8.4	8.3	9.4	9.3	9.6	8.2	8.4	9.1	8.7	7.8	7.4	7.8	7.5	8	9.3	9.1	8.9	9.4	8.9	9.6	9.3	9.4	8.9	9.5	7.2
4976	YINGKOU, CH	40.6667	122.2	4	8.7	9.1	10	10	9.2	8.7	9	9.1	9.8	10.3	10.1	9.7	9.9	9.7	10.5	10.2	9.6	10.3	10.8	10.4	9.6	9.7	10.4	10.3	10.6	9.9	10.1	10.9	10.3	9.8	9.1	9.8	9.2	9.6	10.9	10.4	10.4	10.9	10.3	11	10.7	10.7	10.4	11	8.1
4977	CAOHEKOU, CH	40.883	123.9	235	5.8	6.4	7.3	7.2	6.4	6.1	6.5	6.6	7	5.9
4978	KUANDIAN, CH	40.7167	124.783	261	6.3	6.6	7.9	7.6	7	6.5	7	7.2	7.7	8.8	8.5	8	8.1	7.7	8.6	7.9	7.6	8.1	8.9	8.7	7.7	7.7	8.4	8.5	8.6	7.4	8.3	8.7	8.5	7.7	7.2	7.8	7.2	7.4	8.5	8.4	8.2	8	7.6	8.6	8.7	8.9	8.1	8.7	6.9
4979	DANDONG, CH	40.05	124.333	14	7.9	8.2	9.2	9.2	8.4	8.2	8.4	8.5	9.1	10	9.7	9.5	9.5	9	9.9	9.3	9	9.6	10.2	10	9.1	9.2	9.6	9.7	9.7	8.8	9.7	10.2	9.6	9.5	8.9	9.1	8.4	8.9	9.9	9.6	9.9	9.9	9.4	10.3	10.1	10.4	9.7	10.3	8.1
4982	SHISHAN NORTHEAST, CH	39.717	123.067	17
4985	ZHOUSHUIZI, CH	38.9657	121.539	32.61	10	10.5	11.4	11.5	10.5	9.8	10.4	10.4	11.7	12.3	11.7	11.8	11.9	11.8	12.5	12.1	11.7	12.1	12	12.5	11.7	11.7	12.1	11.6	12.4	11.1	11.7	12.5	11.5	11.7	10.6	10.8	10.6	11.5	12.6	12.5	12.3	12.9	12	12.8	12.1	12.3	11.9	12.8	9.5
5442	ANSHAN, CH	41.133	122.983	17	8.4	11.3	10.8	10.7	9.6	10.5	10	12.1	10.5	12.7	13.9	7.6	-5	13.7	-0.8	9.7	9.6	10.4	13.6	9.3	-5.2	14.8	10.2
5443	BENXI, CH	41.3167	123.783	185										10.9	8.8	8.2	8.4	8.1	9	8.4	8.1	8.7	9.6	8.8	7.9	8.1	8.7	8.8	9.1	7.9	9.1	9.4	9.2	8.6	7.9	8.5	7.9	8.4	9.6	9.4	9.3	9.5	9.2	10	9.7	9.8	9.1	9.8	7.7
5444	TONGHUA, CH	41.717	125.917	312	4	6.3	7	6.7	7.3	8.2	8.9	8.5	6.5	8.6	9.7	4.7		16.2					-3
5445	HUANREN, CH	41.267	125.367	204	6.9	7.2	8.2	7.7	6.9	7.5	8.3	9.4	7.9	8.7	9.5	6	-2.5	12.7								-4.4	-2.8
5451	BAIYANGGOU NW, CH	40.35	122.75	280
5452	SITAIZI, CH	40.467	123.967	126
5455	FUXIAN WAFANGDIAN, CH	39.633	121.983	17	8.9	10.8	10.9	10.4	9	10.6	11	11.5	11	12.8	12.5	8.1	-1.2	11.8	8.2
5456	CHENGZITAN, CH	39.5	122.5	17
17236	TAOXIAN, CH	41.6398	123.483	60.35													11.3	9.1	9.5	9.2	9	9.2	10	8.6	7.6	7.7	8.7	8.6	8.9	7.4	8.4	9.1	9	8.4	7.8	8.2	7.7	8.3	9.7	9.5	9.1	9.5	9.2	9.8	9.3	9.4	8.9	10	7.3
13946	XIONG YUE CHENG, CH	40.167	122.133	1	16.2	-12.2
13948	LU DA ZHENG SHA HE, CH	39.267	122.083	31	12.3	0
	JDP				13.053	2.83932
4987	HUIMIN, CH	37.5	117.533	12	12.5	12.9	13.4	13.3	12.2	12.1	12.7	13	13	13.5	13.2	12.7	12.7	12.9	14	13.5	13	13.7	14.3	14.1	13.7	13.7	14	13.4	13.9	13.7	14.3	14.2	14	13.8	13.4	13.3	13.2	13.4	14.6	14.2	14.4	14.7	14.2	14.6	14.3	14.6	14.3	14.8	13
4988	YANTAI NORTHEAST, CH	37.55	121.367	12
4989	JINAN TSINAN, CH	36.6833	116.983	58	14.2	14.9	15.3	15.3	14	13.9	14.7	15	14.9	15.3	15.1	14.7	14.9	14.7	15.8	15.4	14.8	15.6	16.1	15.3	14.6	14.8	15.3	14.1	14.9	14.5	15.4	15.1	14.7	14.9	14.4	14.2	14.4	14.8	15.5	15.1	15.5	15.8	15.5	15.9	15.1	15.6	14.5	15.7	14.4
4990	TAI SHAN, CH	36.25	117.1	1536	4.7	5.4	5.8	5.9	4.8	5.1	5.6	6.1	5.6	6	6.4	5.7	5.8	5.5	6.7	5.9	5.6	6.7	7.1	6.6	6.1	6.2	6.7	5.9	6.2	5.9	7	6.9	5.9	6.4	5.8	5.5	5.6	6.8	6.5	6.7	7	7.1	6.8	7.2	6.9	7.2	6.7	7.4	5.1
4992	LIUTING, CH	36.2661	120.374	10.05	11.9	12.5	12.9	12.9	12	11.9	12.2	12.3	12.7	13.1	13.2	12.7	12.8	12.6	13.5	13.4	13.3	14.5	14.6	14.6	14.2	13.9	14.5	13.5	14.5	13.4	14.2	14.2	13.2	13.4	13	12.9	12.9	13.3	14.2	14.1	14.2	14.4	14	14.4	13.9	14.3	13.7	14.5	10.9
4993	SHIDAO, CH	36.883	122.417	79
4995	YANZHOU, CH	35.5667	116.85	53	13.4	13.8	14.2	14.3	13.1	13.6	13.7	14.2	14	14.2	14.3	13.8	13.9	13.7	14.8	14.1	13.8	14.5	15	14.8	14.5	14.4	15	13.9	14.7	14.1	15.1	14.7	14.1	14.5	14.3	14	14.1	14.6	15	14.7	15.2	15.4	15.4	15.4	15.1	15.5	15.7	15.8	14.2
5068	XUZHOU, CH	34.2833	117.15	42	14	14.4	14.7	14.9	14	14.1	14.5	14.9	14.7	14.7	15	14.3	14.5	14.4	15.7	14.9	14.6	15.3	15.6	15.5	15.3	15.3	16	14.8	15.9	15.1	16	15.8	15.1	15.3	15.4	14.9	15.1	15.7	15.7	15.4	16	16.3	16.1	16.3	16.1	16.3	16.5	16.2	14.5
5069	NANCHENG NORTHEAST, CH	34.583	119.25	4
5457	HAIYANG DAO, CH	39.05	123.217	-999.9	10	10.7	11.7	11.7	10.7	10.6	10.9	10.8	11.5	12.1	11.4	11.7	11.8	11.6	12.8	10.9	11.4	12.2	12.2	13.3	11.7	11.7	11.7	11.5	12.1	4.9
5462	YONGAN, CH	37.55	118.733	6	12.7	13.1	14	13.1	14.3	14.5	14.2	14.7	13.4	15.1	17	13.2	-2.2	14.3	7.1
5463	LONGKOU, CH	37.6167	120.317	5	11.3	11.9	12.4	12.4	11.7	11.5	11.9	12.4	12.5	12.8	12.8	12.7	12.5	12.5	13.7	13.1	12.6	13.3	13.8	13.7	13.3	13.3	13.5	12.9	13.9	13.3	13.7	14	13.5	13.5	12.7	12.6	12.9	13.4	14.2	13.9	14	14.3	13.8	14.3	14	14.3	13.9	14.5	11.6
5464	WEIHAI, CH	37.45	122.033	61	11.5	12.2	12.7	13	12.3	14.3	13.1	13.1	12.8	13	15.3	11.2	-1.4
5465	CHENGSHANTOU, CH	37.4	122.683	47	10.5	11.1	11.9	12.4	10.6	10.6	11.1	10.9	11.5	12.1	11.8	11.8	11.8	11.5	12.3	11.6	11.3	12	12.1	12.4	11.8	12.1	12.2	11.5	12.1	11.1	11.9	12.5	11.5	11.9	11.1	11	11.3	11.5	12.5	12.5	12.4	12.7	11.9	12.9	12.6	12.8	12.4	12.7	8.9
5467	TAI AN, CH	36.183	117.133	155
5468	LIN ZI, CH	36.867	118.333	55	13	13.5	14.6	13.2	14.2	14.3	14.4	14.9	13.9	16.9	16.3	12.6	-1.3
5470	JUXIAN, CH	35.55	118.75	109	12	12.3	13.9	12.5	13.4	14.2	12.9	13.4	12.7	14.7	15.3	10.1	-3.7		2.7	14.1	12.5	13.1	15	13	0.6	16.4	9.7
5471	LINYI, CH	35.05	118.35	86	13.1	13.7	13.9	14.1	13.1	13.1	13.5	13.8	14	14.2	14.4	13.7	14	13.8	15	14.4	13.9	14.8
5472	RIZHAO, CH	35.4333	119.533	37	12.3	13	13.3	13.3	12.5	12.5	12.6	12.8	13	13.5	13.7	13.1	13.2	13.1	14.2	13.7	13.1	13.9	14.1	13.9	13.6	13.7	14.1	13.2	14.3	13.7	14.4	14.6	13.6	13.9	13.4	13.5	13.3	13.8	14.3	14.1	14.1	14.6	13.9	14.4	14.2	14.6	14.3	14.6	11.3
5473	FLASHING LIGHT, CH	35.967	120.483	25	12	12.6	13.9	12.9	13	12.8	14.6	13.6	12.5	14.5	15.5	12.8	20.2
5528	TANG SHAN, CH	34.417	116.333	44	13.1	14.6	15.7	12.8	12.6	13.8	14.5	15.5	14	15.1	16.3	13.9	19.2	14.6	17.5	15.2	13.9	12.6		10	-0.6
5530	SUINING, CH	33.9	117.95	26	14	15	16.6	14.6	13.6	14.9	15.5	15.4	14.2	15.2	16.8	14.6	20.2	15.6	18	15.8	14	12.7		25.2
5968	GANYU, CH	34.85	119.133	10	12.9	13.4	13.7	13.8	12.9	13.1	13.2	13.5	13.7	13.8	14.3	13.6	13.8	13.6	15	14.3	13.9	14.5	14.7	14.6	14.5	14.5	14.8	13.9	14.9	14.2	14.9	15.1	13.9	14	13.4	13.4	13.7	14.1	14.5	14.5	14.7	15.2	14.8	15	15	15.3	15.2	15.3	12.6
7286	YIYUAN, CH	36.1833	118.15	302	11.7	12.4	12.7	12.8	11.8	11.9	12.2	12.7	12.5	13	12.9	12.4	12.5	12.3	13.5	12.8	12.2	13.1	13.6	13.5	13.1	13.1	13.7	12.6	13.3	12.8	13.9	13.6	12.8	13.1	12.7	12.5	12.7	13.2	13.8	13.7	13.8	14.1	13.8	14.2	13.7	13.9	14	14.2	12.4
11870	APPROXIMATE LOCALE, CH	31.167	111.167	0
11880	XUZHOU GUANYIN AIRPORT, CH	34.0594	117.556	35.05
13758	LAI YANG AFLD, CH	36.967	120.583	72
13759	YANTAI, CH	37.55	121.4	25	7.5	21
13953	CANG SHANG, CH	37.367	119.9	1	15	10.5
13954	GAO MI, CH	36.383	119.733	38	2.1	0.3
13956	CANG KOU, CH	36.167	120.367	10	12.1
14229	DA XIN DIAN, CH	37.617	120.9	100		8.3
15506	CHANG DAO, CH	37.9333	120.717	40							16.1	12	12.3	12.9	12.6	12.6	12.4	12.3	13.4	12.9	12.1	12.9	13.2	13.3	12.7	12.9	13	12.4	13.2	12.5	12.9	13.3	12.8	12.9	11.9	12.1	12.3	12.6	13.6	13.3	13.3	13.7	13.2	13.8	13.5	13.6	13.4	13.7	10.5
17922	LINGXIAN, CH	37.3333	116.567	19																16.9	13.1	13.9	14.3	14.1	13.8	13.7	14.2	13.3	13.6	13.2	13.9	14.2	14	13.8	13.4	13.4	13.5	13.7	14.8	13.8	14.1	14.3	14.1	14.3	14	14.4	14.2	14.3	12.8
18565	FEZXZAN, CH	35.25	117.95	120																			17.4	14.8	14.5	14.6	15.1	13.9	14.9	14.2	15.2	14.9	14.1	14.3	14	14.1	14.1	14.5	15	14.8	15.1	15.4	15.3	15.5	15.1	15.4	15.3	15.4	13.6
25023	YAOQIANG, CH	36.8566	117.216	23.16																												2.2								-0.8	14	13	8	14.3	13.9	14.5	14.3	14.6	3.2
	YSM				7.055	3.17173
4957	XILIN HOT, CH	43.95	116.117	1004	2.3	1.9	3.2	3	2.2	1.5	1.5	2.7	3.1	3.8	3.7	2.9	2.5	2.3	3.7	3.7	3.1	4.1	4.5	4.2	3.1	4.3	3.9	3.1	3.9	2.9	3.6	4.4	3.8	3.3	2.9	2.7	1.7	3.2	4.8	4.1	3.5	4.8	4.4	4.6	3.4	4.1	3.6	4.1	1.8
4922	HUADE, CH	41.9	114	1484	2.4	2.2	3.2	3.4	1.8	1.8	2.5	3.6	2.6	3.8	3.6	3.1	3	2.9	4	3.2	2.8	4.2	4.8	4.5	3.2	3.9	4.1	3.2	4	3.3	4.2	4.8	3.5	3.9	3.1	3.2	2.6	3.9	5	4.4	4	4.7	4.1	4.4	3.9	4.7	3.7	4	3.1
4918	ABAG QI, CH	44.0167	115	1147.7	1.3	0.5	1.9	1.5	1.1	0.2	0.4	1.3	1.9	2.5	2.5	1.8	1	0.8	2.2	2.3	1.6	3	3.3	2.8	1.6	2.9	3.6	2.5	3.6	2.3	2.9	3.7	3.2	2.8	2.3	2.1	0.7	2.6	4.3	3.4	2.8	4.1	3.6	4	2.5	3	2.7	3.3	1.1
4963	DUOLUN, CH	42.1833	116.467	1247	1.9	1.4	2.7	2.7	1.6	1.2	1.8	3.3	2.6	3.4	3.4	2.7	2.1	2.3	3.5	2.9	2.9	3.6	4.5	4	2.7	3.6	3.8	2.8	3.7	2.7	3.6	3.9	3.4	3.4	2.8	2.5	2	3.4	4.5	3.7	3.5	4.1	4	4.2	3.2	4	3.6	4.1	2
4964	CHIFENG, CH	42.3	118.833	567	7.1	7.7	8.4	8.3	7.1	6.7	7.1	7.9	8.3	8.7	8.4	7.6	8	7.4	8.1	7.8	7.4	8	8.4	8.1	7.6	7.9	7.9	8	8.3	7.6	8.2	9.1	8.7	8.5	7.3	7.4	6.3	7.4	8.4	8.1	7.8	8.3	8	8.6	8.1	8.4	8	8.6	6.7
4965	ZHANGWU, CH	42.4167	122.533	84	6.8	7.6	8.2	8	7.1	6.9	7.2	7.1	8	8.4	8.3	7.8	8	7.8	8.6	8.4	7.8	8.6	8.8	8.3	7.4	7.6	8.5	8.6	8.7	7.9	8.3	9.4	8.8	7.9	7.3	8	7.4	7.9	8.8	8.9	8.5	9.2	8.6	9.2	8.9	8.9	8.8	9.1	6.7
4968	WEICHANG, CH	41.9333	117.75	844	5.1	5.2	6.1	6.3	5.1	4.7	5.3	5.8	6	6.5	6.2	5.7	5.6	5.7	6.7	6.4	5.7	6.5	6.8	6.7	6.1	6.5	6.7	6.5	6.4	5.6	6.4	6.9	6.2	5.6	4.6	5.3	4.3	5.2	6	5.6	5.3	5.8	5.7	5.9	5.5	6	5.5	6	4.4
4969	JINZHOU, CH	41.1333	121.117	70	8.8	9.5	10	10.1	9	8.5	9	9	9.8	10.5	10	9.7	10.2	9.9	10.5	10.2	9.7	10.5	10.6	10.6	9.9	9.7	10.8	10.6	10.9	10	10.3	11.1	11.1	10.7	9.5	10.4	9.4	10.1	11.3	11.1	10.7	11.4	10.7	11.5	11.1	11	10.7	11.3	8.6
4974	CHENGDE, CH	40.9667	117.917	423	8.6	9.2	9.9	9.9	8.8	8.4	8.9	8.9	9.4	10	9.4	9	9.1	9	10	9.5	8.9	9.8	10.3	9.9	8.7	8.8	9.1	8.9	8.8	8	8.9	9.2	8.6	8.7	7.6	8.9	8.4	9	10	9.6	9.5	10	9.7	10.1	9.8	9.7	9.8	10.3	8.8
4975	SHAN HAI GUAN, CH	40	119.75	27
5410	ENGER SHOOTO, CH	43.383	114.45	1128	3.6	3	5	1.8	3.3	5.9	6.2	5	5.8
5432	WUDAN ONGNIUD QI, CH	42.967	119.033	634	5.1	7.2	8.3	7.1	6.2	9.1	9	10.7	7.8	10.4	8.2	5.4
5433	BUGT, CH	42.3333	120.7	401	7.1	7.8	8.3	8.4	7	6.7	7.1	7.5	8.1	8.4	8.1	7.4	7.8	7.8	8.2	8.2	7.6	8.4	8.6	8.3	7.8	8	8.5	8.6	8.5	7.6	8	8.9	8.6	7.9	6.8	7.5	6.5	7.7	8.5	8.7	8.3	8.9	8.5	8.9	8.6	8.5	8.1	8.6	6.6
5434	FUXIN, CH	42	121.633	182	7.1	9.8	9.4	8.7	7.4	9.4	8.9	10.9	8.5	11.6	11.9	7		10.9			-1.4					-4.4	-5.2
5438	FENGNING, CH	41.2	116.633	661	6.6	7	7.6	7.7	6.7	6.3	6.8	7.2	7.3	7.9	7.7	7.2	7.1	7.3	8.3	7.8	7.2	8.1	8.6	8.5	7.7	8	8.4	8	8	7.3	7.9	8.6	7.6	7.7	6.7	7.3	6.6	7.3	8.3	7.9	7.7	8.2	7.9	8.3	7.9	8.2	7.8	8.4	7.3
5439	CHAOYANG, CH	41.55	120.45	176	8.6	9.5	10	9.9	8.5	8.2	8.7	9.4	9.7	10.2	10	9.3	9.8	9.6	10.7	10.2	9.9	10.8	10.9	10.6	10.2	10.2	10.7	10.7	10.9	9.5	10	10.7	10.4	10	8.8	9.6	8.6	9.7	10.8	10.9	10.4	11	10.4	11	10.7	10.8	10.1	11.3	8.4
5440	CHAOYANG AIRFIELD, CH	41.583	120.433	152	8.2	9.6	9.4	9	9.2	10.7	11.6	11.1	8.8	11.5	10	8.2
5441	GOUBANGZI, CH	41.383	121.8	25	8	9.8	10.7	9.7	8.9	9	10.2	11.7	8.4	11.1	11.7	7.8	-4.1	5.2	-3.8	8.8	8.7	8.9	11.6	8	-7.3	11.9	8
5448	ZUNHUA, CH	40.2	117.967	152	10.6	10.8	13.1	11.5	11.2	11.5	11.9	12	11.3	14.1	12.7	11.4	-4.4
5449	QINGLONG, CH	40.4	118.95	228	8.9	9.5	10.3	10.3	9	8.7	9.3	9.4	9.9	10.4	10.2	9.8	10	9.7	10.7	9.8	9.7	10.6	11	10.8	10.3	10.3	10.7	10.6	10.5	9.8	10.6	10.8	10.4	10.4	10	10.8	9.7	9.8	10.9	10.9	10.7	11.2	10.5	12.8	5.8	5.7	10.6	11	9.6
5450	SHAHOUSUO, CH	40.484	120.567	10
13755	SUIZHONG, CH	40.35	120.35	18	9	11	11	10.3	9.7	10	10.1	12.5	10	12.1	12.4	8.8	-2.1	4.9	7.8
	ZGR JR				4.151	1.72279
2152	EKATERINO NIKOL SKOE, RS	47.7333	130.967	73	1.5	2.2	3	2.4	1.7	1.9	2.4	1.3	2.6	3.3	3.8	2.5	2.1	2.4	2.7	3.4	2.1	2.9	3	2.1	-3.4	3.6	3	3.5	2.3	2.5	2.3	3.8	3.6	2.1	2.4	3	2.3	2.5	-1.6	3.7	2.2	3.3	2.9	3.3	3.9	3.5	3.2	3.4	0.5
2162	TURIJ ROG, RS	45.2167	131.983	88	2.2	3.1	4.4	3.5	2.5	3.3	3.5	2.6	3.4	3.9	3.4	0.5	2.4	3.2	3.9	5.4	3	4.5	6.4	5.7	4.6	5	4.4	5.3	5.4	4.5	4.7	5.6	5.8	4.5	4.9	5.3	4.8	0.7		0.2	22.8	0.3	-11.9
2163	POGRANICHNYJ, RS	44.4	131.383	211	3.8	4.2	5.3	4.5	3.5	4.1	4.1	3.8	4.5	4.7	5.4	3.6	4.2	4.3	4.7	4.3	4.3	4.9	5	4.6	3.9	4.5	4.7	5.2	5.2	4.3	4.6	5.5	5.6	4.2	4.3	4.5	3.9	4.5	4.9	5.6	4.5	5.1	4.9	5.7	5.6	5.4	5.2	5.8	2.6
4097	POLTAVKA, RS	44.0333	131.317	109	4	4.3	5.2	4.4	3.3	3.9	3.8	3.2	4.3	5.4	5.4	4.9	4.3	3.9	4.4	6.3	4.1	4.8	7.7				6.5	6.6	6.9	5.3	-5.3
4098	ASTRAHANKA, RS	44.7167	132.067	78	3.8	3.4	4.5	3.5	2.8	3.9	3.7	3.5	4.2	4.8	5.1	4.6	4.6	4.4	4.8	5.1	4.2	4.6	5	4.7	3.6	4.1	4.7	4.9	4.9	4.3	4.3	5.3	5.3	3.7	3.9	4.3	3.9	4.2	4.8	5.2	4.4	5.1	4.9	5.6	5.1	5.6	-1.3
4862	FUJIN, CH	47.2333	131.983	65	2.5	2.9	4	2.8	2.2	2.9	3.3	2.5	3.8	4.4	4.7	3.8	3.8	3.8	3.7	4.2	3.3	3.8	4.4	3.1	2.9	3	3.2	3.8	3.4	3.1	2.8	4.3	4.1	2.5	2.7	3.1	2.8	3.1	3.6	4.4	2.9	3.7	3.7	4.4	4.7	4.6	4	3.8	1
4865	CHIA MU SSU CHIAMUEZE, CH	46.817	130.333	80.2
4870	TONGHE, CH	45.9667	128.733	110	1.6	2.1	3.6	2.6	1.9	2	2.5	1.9	2.8	3.6	4.1	2.9	2.8	2.9	3.2	3.7	2.9	3.5	4	2.8	2.7	2.9	3.2	3.7	3.5	3	3	4.5	4.2	2.6	2.3	3.1	2.9	2.7	3.3	4.1	3.2	3.6	3.7	4.5	4	4.4	3.8	3.4	0.8
4871	SHANGZHI, CH	45.2167	127.967	191	2.5	3.1	4.3	3.5	2.6	2.7	3	2.6	3.5	4.3	4.7	3.6	3.7	3.6	4	4.5	3.8	4.7	5.2	3.9	3.4	3.6	4.2	4.8	4.5	3.8	4.3	5.5	5.1	3.5	3.2	4.2	3.7	3.7	4.4	4.9	4.5	4.8	4.7	5.6	5.1	5.5	5	4.8	2.1
4872	JIXI, CH	45.3	130.917	273.5	3.5	3.8	5.2	4.2	3.4	4	4	3.7	4.6	5.3	5.5	4.5	4.5	4.4	4.7	5.2	4.2	4.8	5.4	4.7	4.1	4.7	4.8	5.6	4.9	4	4.3	5.4	5.4	3.9	4.1	4.4	3.9	4.4	4.8	5.5	4.5	5.2	5.1	5.8	5.4	5.7	5.2	5.1	2.5
4955	MUDANJIANG, CH	44.5	129.667	306.5	3.3	4	5.4	4.5	3.9	4.3	4	3.9	4.6	5.1	5.3	4.4	4.8	4.6	5.2	5.5	4.7	4.8	6	5.3	4.2	4.6	5.1	5.7	5.4	4.6	5.3	6.1	6.1	4.5	4.4	4.6	4.3	4.5	4.5	5.5	4.7	5.1	5	5.9	5.4	5.6	5.3	5.2	2.5
4956	SUIFENHE, CH	44.3833	131.15	498	2.5	2.8	4	3.1	2.3	3	2.6	2.8	3.3	4.2	4.4	3.4	3.6	3.4	3.9	4.1	3.3	4	4.5	3.9	3	3.5	3.8	4.3	4	2.9	3.6	4.3	4.4	2.9	3.1	3.3	2.7	3.3	3.7	4.5	3.5	4	3.7	4.8	4.3	4.4	4.1	4.2	1.7
4962	JIAOHE SOUTH, CH	43.717	127.15	275
4967	YANJI, CH	42.8833	129.5	178	4.9	5.3	5.9	5.5	4.8	5	4.8	4.8	5.4	6.3	6.2	5.5	5.7	5.6	6.3	6.2	5.7	6	6.5	6.3	5.4	5.8	5.9	6.3	6.6	5.7	5.8	6.7	6.6	5.5	5.6	5.6	5	5.6	6.4	6.7	6	6.6	6.4	7.1	7	6.8	6.5	6.9	4.6
5262	ZHARIKOVO NORTHWEST, RS	44.583	131.717	134
5387	YICHUN, CH	47.7	128.833	259.1	0.7	0.9	2.4	1.6	1.1	0.9	1.5	0.7	2	2.3	2.7	1.5	1.5	1.8	1.7	2.4	1.1	2	2.4	1.5	1.3	1.6	1.9	2.4	2.1	1.4	1.3	2.9	2.9	1.3	1.7	1.8	1.2	2	1.9	2.8	1.8	2.2	2.3	2.9	3.2	2.7	2.4	2.4	0
5388	HE GANG, CH	47.35	130.2	198	2.1	3.3	4.4	2.6	3.3	5.2	6.5	3.5	4	6.1	5.6	2.9
5390	TIE LI, CH	47.067	128.033	264	2.8	1.4	4.8	2.6	1.9	5.1	4.2	4.5	4.1	4.9	4.3	3.3
5391	BAOQING, CH	46.3167	132.183	83	3.5	3.8	5.1	4.1	3.3	3.9	4.3	3.7	4.7	5.4	5.8	4.8	4.8	4.9	4.9	5.3	4.3	5	5.5	4.6	4	4.8	4.7	5.5	5.2	4.7	4.7	5.8	6	4	4.6	5	4.4	4.8	5.3	5.3	4	4.9	4.9	5.5	5.3	5.4	5	4.7	1.7
5425	SHAHEZI SE, CH	44.483	127.6	249
5426	MUDANJIANG NORTH, CH	44.133	129.217	282
5429	JILIN, CH	43.85	126.55	188	3.8	6.2	6.4	5.1	5.3	7.2	6.9	7.3	5.3	8.6	9.3	3.7		4.1
5430	DUNHUA, CH	43.3667	128.2	525	2.7	3.3	4.4	3.6	2.9	3.1	3	3.4	3.7	4.6	4.7	3.7	4.1	3.8	4.6	4.5	4.1	4.6	5.4	4.7	3.7	4.2	4.7	5	5	3.8	4.4	5.3	5.2	4.1	3.9	4	3.3	4.3	5.1	5.5	5	5.1	5.2	6.1	5.5	5.7	5	5.5	3.1
5431	LUO ZI GOU, CH	43.717	130.317	500	3.4	4.2	1.9	1.4	3.9	7.7	5.1	9.7	1.3
5436	HUADIAN, CH	42.9833	126.75	264	4.1	4.5	5.5	5	4.6	4.2	4.2	4.5	5.2	5.9	6.1	5	5.3	5	5.8	3	5.4	5.6	6.9	5.6	4.5	5.1	6	6	5.8	4.6	5.5	6.3	6.2	5.1	4.7	4.7	4.4	5	6	6	5.7	5.7	5.9	6.7	6.4	7	5.8	6.3	4
7271	YI LAN, CH	46.3	129.55	99	4	4.8	5.9	2.9	4.6	6.2	7.4	4.5	5.1	6.6	5	6.8
16166	WANG CH ING, CH	43.317	129.75	244										8.1	6.4	3.7

## Sheet: Present Day Latitude
Modern Mean Latitude of Different Arc Segments (N °)			Latitude differences relative toYSM Arc Segment (N °)
Yanshan Mountains (YSM)		41.3 ± 1.3	——
North Taihangshan (NTHM)		39.0 ± 1.0	-2.3
South Taihangshan (STHM)		36.3 ± 1.3	-5
South Great Xing'an Range (SGXR)		45.3 ± 2.3	4
Nouth Great Xing'an Range and Erguna Region (NGXR+EGN)		50.0 ± 3.0	8.7
Liaodong Peninsula (LDP)		40.8 ± 1.8	-0.5
Jiaodong Peninsula (JDP)		36.3 ± 1.3	-5
Songliao (SB)		45.8 ± 1.8	4.5
Zhangguangcai Range and Jiamusi Region (ZGR+JR)		45.5 ± 2.5	4.2
Korea Peninsula (KP)		36.0 ± 2.0	-5.3

## Sheet: Paleo-Latitude Estimation
Time (Ma)	Latitude Difference	Yanshan Mountains (YSM)		Time (Ma)	Latitude Difference	North Taihangshan (NTHM)		Time (Ma)	Latitude Difference	South Taihangshan (STHM)		Time (Ma)	Latitude Difference	South Great Xing'an Range (SGXR)		Time (Ma)	Latitude Difference	Nouth Great Xing'an Range and Erguna Region (NGXR+EGN)		Time (Ma)	Latitude Difference	Liaodong Peninsula (LDP)		Time (Ma)	Latitude Difference	Jiaodong Peninsula (JDP)		Time (Ma)	Latitude Difference	Songliao (SB)		Time (Ma)	Latitude Difference	Zhangguangcai Range and Jiamusi Region (ZGR+JR)		Time (Ma)	Latitude Difference	Korea Peninsula (KP)
		Paleo-Latitude (°)	Error			Paleo-Latitude (°)	Error			Paleo-Latitude (°)	Error			Paleo-Latitude (°)	Error			Paleo-Latitude (°)	Error			Paleo-Latitude (°)	Error			Paleo-Latitude (°)	Error			Paleo-Latitude (°)	Error			Paleo-Latitude (°)	Error			Paleo-Latitude (°)	Error
——	——	——	——	179	——	32.5	5.5	——	——	——	——	——	——	——	——	179	11	43.5	5.5	——	——	——	——	——	——	——	——	——	——	——	——	179	6.5	39	5.5	179	-3	29.5	5.5
170	——	40.9	7.1	——	——	——	——	——	——	——	——	——	——	——	——	170	8.7	49.6	7.1	——	——	——	——	——	——	——	——	——	——	——	——	——	——	——	——	170	-5.3	35.6	7.1
165	——	39	6.6	——	——	——	——	——	——	——	——	——	——	——	——	165	8.7	47.7	6.6	——	——	——	——	——	——	——	——	——	——	——	——	——	——	——	——	165	-5.3	33.7	6.6
160	——	34	3.2	——	——	——	——	——	——	——	——	160	4	38	3.2	160	8.7	42.7	3.2	——	——	——	——	——	——	——	——	——	——	——	——	——	——	——	——	——	——	——	——
155	——	37.9	5.1	——	——	——	——	——	——	——	——	155	4	41.9	5.1	——	——	——	——	——	——	——	——	——	——	——	——	——	——	——	——	——	——	——	——	——	——	——	——
153	——	32.5	2.1	——	——	——	——	——	——	——	——	153	4	36.5	2.1	——	——	——	——	——	——	——	——	——	——	——	——	——	——	——	——	——	——	——	——	——	——	——	——
147	——	25.6	3.9	147	-2.3	23.3	3.9	——	——	——	——	147	4	29.6	3.9	——	——	——	——	——	——	——	——	——	——	——	——	——	——	——	——	——	——	——	——	——	——	——	——
141	——	35.3	3.2	141	-2.3	33	3.2	——	——	——	——	141	4	39.3	3.2	141	8.7	44	3.2	——	——	——	——	——	——	——	——	——	——	——	——	——	——	——	——	——	——	——	——
140	——	40.9	4.3	140	-2.3	38.6	4.3	——	——	——	——	140	4	44.9	4.3	140	8.7	49.6	4.3	——	——	——	——	——	——	——	——	——	——	——	——	——	——	——	——	——	——	——	——
130	——	42.5	2.3	130	-2.3	40.2	2.3	130	-5	37.5	2.3	130	4	46.5	2.3	130	8.7	51.2	2.3	130	-0.5	42	2.3	130	-5	37.5	2.3	——	——	——	——	——	——	——	——	——	——	——	——
120	——	41	5.1	120	-2.3	38.7	5.1	——	——	——	——	120	4	45	5.1	120	8.7	49.7	5.1	120	-0.5	40.5	5.1	120	-5	36	5.1	——	——	——	——	——	——	——	——	——	——	——	——
110	——	41	3.2	——	——	——	——	——	——	——	——	——	——	——	——	——	——	——	——	——	——	——	——	110	-5	36	3.2	110	4.5	45.5	3.2	110	4.2	45.2	3.2	110	-5.3	35.7	3.2
	Notes: Paleo-latitude data in red are published data, and the related references see below. Other paleo-latitude data are estimated according to the published data.
	References:
	Gao, Y., Zhang, S., Zhao, H., Ren, Q., Yang, T., Wu, H., Li, H., 2021. North China block underwent simultaneous true polar wander and tectonic convergence in late Jurassic: New paleomagnetic constraints. Earth and Planetary Science Letters 567, 117012. Hou, Y., Zhao, P., Qin, H., Mitchell, R.N., Li, Q., Hao, W., Zhang, M., Ward, P.D., Yuan, J., Deng, C., Zhu, R., 2024. Completing the loop of the …

## Sheet: MAT Data This Study
Location	Time (Ma)	Paleolatitude (°)	Error	MAT (Equator) (℃)	Global Average Temperatures (℃)	Temp.Dif. (℃)	Pole to Equator Gradient (℃/°)	Temp.difference (Latitude-Corrected) (℃)	Error	MAT(Latitude-corrected) (℃)	Error	Paleo-Elevation	Error	Temp.difference (Ele-Corrected, Maximum) (℃)	Error	Temp.difference (Ele-Corrected, Minimum) (℃)	Error	MAT(Final, Maximum) (℃)	Error	MAT(Final, Minimum) (℃)	Error	Mean (℃)	Error
JDP	120	36	5.1	31.3205	23.9205	7.4	0.295263	6.20052	1.50584	25.12	1.50584	3.97849	0.722075	15.1182	2.74388	20.6881	3.75479	10.0018	3.12993	4.43188	4.04549	7.21682	6.37265
JDP	130	37.5	2.3	28.0067	20.8567	7.15	0.258077	5.80674	0.593578	22.2	0.593578	3.9048	0.559976	14.8383	2.12791	20.305	2.91188	7.36174	2.20915	1.89502	2.97176	4.62838	5.32382
LDP	120	40.5	5.1	31.3205	23.9205	7.4	0.304334	7.76052	1.5521	23.56	1.5521	3.89007	0.54524	14.7823	2.07191	20.2284	2.83525	8.77774	2.58879	3.33165	3.23228	6.05469	5.63359
LDP	130	42	2.3	28.0067	20.8567	7.15	0.266916	7.20674	0.613907	20.8	0.613907	3.89007	0.471559	14.7823	1.79192	20.2284	2.45211	6.01774	1.89417	0.571648	2.52779	3.29469	4.93403
KP	110	35.7	3.2	27.3623	21.0623	6.3	0.249384	5.16225	0.79803	22.2	0.79803	4.17006	0.397878	15.8462	1.51194	21.6843	2.06897	6.35379	1.70962	0.515709	2.21754	3.43475	4.88262
KP	165	33.7	6.6	28.129	21.329	6.8	0.239146	4.47203	1.57836	23.657	1.57836	3.78691	0.279988	14.3903	1.06396	19.692	1.45594	9.26668	1.90348	3.965	2.14732	6.61584	4.67624
KP	170	35.6	7.1	28.7183	21.8183	6.9	0.24272	5.00003	1.72331	23.7183	1.72331	3.78691	0.279988	14.3903	1.06396	19.692	1.45594	9.32799	2.02529	4.02631	2.25601	6.67715	4.79149
KP	179	29.5	5.5	31.1607	24.1707	6.99	0.313561	4.54664	1.72459	26.6141	1.72459	3.06484	0.648394	11.6464	2.4639	15.9372	3.37165	14.9677	3.00749	10.6769	3.78711	12.8223	5.54269
NGXR+EGN	120	49.7	5.1	31.3205	23.9205	7.4	0.337767	11.7205	1.72261	19.6	1.72261	3.72797	0.501032	14.1663	1.90392	19.3854	2.60536	5.43372	2.56755	0.214559	3.12335	2.82414	5.45503
NGXR+EGN	130	51.2	2.3	28.0067	20.8567	7.15	0.295766	10.7067	0.680262	17.3	0.680262	3.58061	0.677866	13.6063	2.57589	18.6192	3.5249	3.69369	2.6642	-1.31916	3.58995	1.18727	5.6335
NGXR+EGN	140	49.6	4.3	26.241	19.241	7	0.287098	9.9336	1.23452	16.3074	1.23452	3.58061	0.677866	13.6063	2.57589	18.6192	3.5249	2.70113	2.85644	-2.31172	3.73484	0.19471	5.80206
NGXR+EGN	141	44	3.2	25.8373	18.8473	6.99	0.247738	7.18439	0.792761	18.6529	0.792761	3.58061	0.677866	13.6063	2.57589	18.6192	3.5249	5.04656	2.69512	0.0337093	3.61295	2.54013	5.66046
NGXR+EGN	160	42.7	3.2	26.4315	19.7815	6.65	0.260728	7.22216	0.834329	19.2094	0.834329	4.40584	0.294724	16.7422	1.11995	22.9103	1.53257	2.46719	1.39657	-3.70098	1.74495	-0.616894	4.65485
NGXR+EGN	165	47.7	6.6	28.129	21.329	6.8	0.27833	9.10138	1.83698	19.0276	1.83698	4.40584	0.294724	16.7422	1.11995	22.9103	1.53257	2.28543	2.15146	-3.88274	2.39233	-0.798654	5.35598
NGXR+EGN	170	49.6	7.1	28.7183	21.8183	6.9	0.286441	9.91086	2.03373	18.8074	2.03373	4.40584	0.294724	16.7422	1.11995	22.9103	1.53257	2.06527	2.32171	-4.1029	2.54653	-1.01882	5.51821
NGXR+EGN	179	41.2	5.5	31.1607	24.1707	6.99	0.288886	7.56882	1.58887	23.5919	1.58887	4.40584	0.294724	16.7422	1.11995	22.9103	1.53257	6.8497	1.94392	0.681533	2.20755	3.76562	5.15982
STHM	130	37.5	2.3	28.0067	20.8567	7.15	0.262522	5.90674	0.6038	22.1	0.6038	3.13852	0.574713	11.9264	2.18391	16.3203	2.98851	10.1736	2.26584	5.77969	3.04889	7.97666	4.85433
NTHM	120	38.7	5.1	31.3205	23.9205	7.4	0.300444	7.12052	1.53226	24.2	1.53226	4.34689	0.559976	16.5182	2.12791	22.6038	2.91188	7.68182	2.62218	1.59617	3.29042	4.63899	5.99912
NTHM	130	40.2	2.3	28.0067	20.8567	7.15	0.30741	7.74674	0.707044	20.26	0.707044	4.34689	0.559976	16.5182	2.12791	22.6038	2.91188	3.74182	2.2423	-2.34383	2.99649	0.698992	5.66222
NTHM	140	38.6	4.3	26.241	19.241	7	0.250326	5.90769	1.0764	20.3334	1.0764	3.97849	0.618921	15.1182	2.3519	20.6881	3.21839	5.21511	2.58652	-0.354771	3.39362	2.43017	5.77501
NTHM	141	33	3.2	25.8373	18.8473	6.99	0.212564	3.82615	0.680205	22.0111	0.680205	3.97849	0.618921	15.1182	2.3519	20.6881	3.21839	6.89287	2.44829	1.32299	3.28949	4.10793	5.65383
NTHM	147	23.3	3.9	26.2194	19.3294	6.89	0.384433	3.1908	1.49929	23.0286	1.49929	3.97849	0.618921	15.1182	2.3519	20.6881	3.21839	7.91036	2.78914	2.34048	3.55048	5.12542	5.95475
SB	110	45.5	5.1	27.3623	21.0623	6.3	0.270894	8.26225	1.38156	19.1	1.38156	2.28382	0.648394	8.67851	2.4639	11.8759	3.37165	10.4215	2.8248	7.22414	3.64372	8.82281	4.83293
SGXR	120	45	5.1	31.3205	23.9205	7.4	0.320684	9.62052	1.63549	21.7	1.63549	2.74064	0.412614	10.4144	1.56793	14.2513	2.14559	11.2856	2.26567	7.44866	2.69785	9.36711	4.40021
SGXR	130	46.5	2.3	28.0067	20.8567	7.15	0.277992	8.75674	0.639381	19.25	0.639381	2.72591	0.397878	10.3584	1.51194	14.1747	2.06897	8.89156	1.64157	5.07529	2.16551	6.98342	3.81167
SGXR	140	44.9	4.3	26.241	19.241	7	0.266044	7.95472	1.14399	18.2863	1.14399	2.72591	0.397878	10.3584	1.51194	14.1747	2.06897	7.92788	1.89596	4.11161	2.36418	6.01974	4.0382
SGXR	141	39.3	3.2	25.8373	18.8473	6.99	0.226498	5.50391	0.724795	20.3334	0.724795	3.03537	0.66313	11.5344	2.51989	15.7839	3.44828	8.79896	2.62206	4.54944	3.52363	6.6742	5.1976
SGXR	147	29.6	3.9	26.2194	19.3294	6.89	0.308585	4.50534	1.20348	21.7141	1.20348	3.03537	0.66313	11.5344	2.51989	15.7839	3.44828	10.1797	2.79253	5.93015	3.65226	8.05491	5.34715
SGXR	153	36.5	2.1	27.4673	20.7273	6.74	0.201567	4.33369	0.423291	23.1336	0.423291	3.03537	0.66313	11.5344	2.51989	15.7839	3.44828	11.5992	2.5552	7.34968	3.47416	9.47444	5.13944
SGXR	155	41.9	5.1	28.368	21.668	6.7	0.253245	6.81228	1.29155	21.5557	1.29155	3.03537	0.66313	11.5344	2.51989	15.7839	3.44828	10.0213	2.8316	5.77182	3.68221	7.89658	5.38166
SGXR	160	38	3.2	26.4315	19.7815	6.65	0.24317	5.5929	0.778142	20.8386	0.778142	3.03537	0.66313	11.5344	2.51989	15.7839	3.44828	9.30423	2.6373	5.05472	3.53498	7.17947	5.2109
YSM	120	41	5.1	31.3205	23.9205	7.4	0.308482	8.02052	1.57326	23.3	1.57326	4.40584	0.397878	16.7422	1.51194	22.9103	2.06897	6.55782	2.18199	0.389655	2.59918	3.47374	5.47467
YSM	130	42.5	2.3	28.0067	20.8567	7.15	0.287518	7.90674	0.661291	20.1	0.661291	4.28795	0.530504	16.2942	2.01592	22.2973	2.75862	3.80581	2.12161	-2.19732	2.83678	0.804244	5.48075
YSM	140	40.9	4.3	26.241	19.241	7	0.252863	6.54916	1.08731	19.6919	1.08731	4.28795	0.530504	16.2942	2.01592	22.2973	2.75862	3.39768	2.29045	-2.60544	2.96517	0.396122	5.62937
YSM	141	35.3	3.2	25.8373	18.8473	6.99	0.214018	4.34456	0.684856	21.4927	0.684856	4.28795	0.530504	16.2942	2.01592	22.2973	2.75862	5.19851	2.12907	-0.804614	2.84236	2.19695	5.48728
YSM	147	25.6	3.9	26.2194	19.3294	6.89	0.349172	3.70122	1.36177	22.5182	1.36177	3.94901	0.515768	15.0062	1.95992	20.5349	2.68199	7.51193	2.38656	1.98331	3.00791	4.74762	5.46154
YSM	153	32.5	2.1	27.4673	20.7273	6.74	0.186067	3.25617	0.39074	24.2111	0.39074	3.94901	0.515768	15.0062	1.95992	20.5349	2.68199	9.20486	1.99849	3.67624	2.71031	6.44055	5.11871
YSM	155	37.9	5.1	28.368	21.668	6.7	0.241458	5.52938	1.23143	22.8386	1.23143	3.94901	0.515768	15.0062	1.95992	20.5349	2.68199	7.83238	2.31467	2.30376	2.95119	5.06807	5.39724
YSM	160	34	3.2	26.4315	19.7815	6.65	0.235504	4.47457	0.753611	21.957	0.753611	4.36163	0.559976	16.5742	2.12791	22.6805	2.91188	5.38278	2.25742	-0.723502	3.00782	2.32964	5.68576
YSM	165	39	6.6	28.129	21.329	6.8	0.245651	5.89564	1.6213	22.2334	1.6213	4.36163	0.559976	16.5742	2.12791	22.6805	2.91188	5.65917	2.67519	-0.447108	3.33281	2.60603	6.05714
YSM	170	40.9	7.1	28.7183	21.8183	6.9	0.251986	6.52643	1.7891	22.1919	1.7891	4.36163	0.559976	16.5742	2.12791	22.6805	2.91188	5.6177	2.78008	-0.488582	3.41759	2.56456	6.15197
ZGR+JR	110	45.2	5.1	27.3623	21.0623	6.3	0.270273	8.16225	1.37839	19.2	1.37839	3.38904	0.766284	12.8783	2.91188	17.623	3.98467	6.32166	3.22165	1.57701	4.21635	3.94934	6.09132
ZGR+JR	179	36.7	5.5	31.1607	24.1707	6.99	0.291572	6.3271	1.60364	24.8336	1.60364	3.0501	0.692602	11.5904	2.63189	15.8605	3.60153	13.2432	3.08197	8.97305	3.94242	11.1081	5.64727
		Notes: Assuming atmospheric lapse rate ranges of 3.8-5.2 ℃/km
