# Supplementary material for: High-elevation orogenic plateau influences ecosystems
Source: Research Square preprint supplement (doi:10.21203/rs.3.rs-5816615/v1), 2025-01-23
Supplement: Supplementary file 6 [file bee0aba4bb001cddc15b39c6.xlsx]

## Sheet: South North China Craton
Order	Sample.No	Location	Latitude (N)	Longitude (E)	Rock types	Method	Age (Ma)		Reference
							206Pb/238U or 207Pb/206Pb	Error
1	SD-73b	linqu	36.4314	118.618	Trachyte	LA-ICP-MS	121.3	1.5	Cao et al., 2018
2	HL-6	Wu’an, Handan	36.8421	114.161	Monzodiorite	SHRIMP	133	2	Chen et al., 2008
3	XS-24	Xishu, Handan	36.6485	113.958	Gabbroic Diorite	SHRIMP	132	2	Chen et al., 2008
4	QC-3	Wu’an, Handan	36.9438	114.329	Monzonite	SHRIMP	132	1	Chen et al., 2008
5	HS-15	Hongshan, Handan	36.7542	114.346	Syenite	SHRIMP	132	2	Chen et al., 2008
6	DG-05	Donggou, Henen	33.9504	112.38	Granitic Porphyry	LA-ICP-MS	117	1	Dai et al., 2009
7	DG-02	Donggou, Henen	33.9504	112.38	Granitic Porphyry	LA-ICP-MS	114	1	Dai et al., 2009
8	09LT5-1	Lantian pluton	34.1223	109.554	Porphyritic Monzogranite	LA-ICP-MS	154	1	Ding et al., 2010
9	09MHG06-1	Muhuguan pluton	34.036	109.427	Monzogranite	LA-ICP-MS	151	2	Ding et al., 2010
10	LN28	Laoniushan complex	34.2359	109.558	Biotite Monzogranite	LA-ICP-MS	228	1	Ding et al., 2011
11	LN49	Laoniushan complex	34.2465	109.541	Quartz Diorite	LA-ICP-MS	227	1	Ding et al., 2011
12	LN44	Laoniushan complex	34.2478	109.54	Quartz Monzonite	LA-ICP-MS	217	2	Ding et al., 2011
13	LN9	Laoniushan complex	34.3898	109.831	Hornblende Monzonite	LA-ICP-MS	215	4	Ding et al., 2011
14	SD-27	Aishan	37.4133	120.776	Monzogranite	SHRIMP	125	3	Goss et al., 2010
15	SD-11	Sanfoshan	36.9763	121.725	Monzogranite	SHRIMP	118	1	Goss et al., 2010
16	SD-12	Sanfoshan	36.9763	121.725	Syenogranite	SHRIMP	117	1	Goss et al., 2010
17	SD-28	Aishan	37.413	120.776	Monzogranite	SHRIMP	116	2	Goss et al., 2010
18	SD-30	Yashan	37.2024	120.998	Monzonite Enclave	SHRIMP	116	1	Goss et al., 2010
19	SD-31	Yashan	37.2024	120.998	Monzogranite	SHRIMP	113	2	Goss et al., 2010
20	WD3	Wendeng	37.216	121.997	Granite	TIMS	161	9	Guo et al., 2005
21	DG49	Duogushan	36.8839	121.719	Granodiorite	SHRIMP	161	1	Guo et al., 2005
22	WD13	Wendeng	37.102	121.971	Granite	SHRIMP	160	3	Guo et al., 2005
23	KY33	Taiboding	37.2837	121.69	Porphyritic Alkali Feldspar Granite	TIMS	114	1	Guo et al., 2005
24	KY34	Liudusi	37.2451	121.749	Pyroxene Diorite	TIMS	114.5	0.8	Guo et al., 2005
25	RC13	Weideshan	37.2752	122.416	Porphyritic Alkali Feldspar Granite	TIMS	108	2	Guo et al., 2005
26	JZ322	Jiazishan	36.9007	122.366	Gabbro	SHRIMP	213	5	Guo et al., 2005
27	JZ5	Jiazishan	37.0086	122.452	Pyroxene Syenite	TIMS	212	2	Guo et al., 2005
28	JZ319	Jiazishan	36.9007	122.366	Pyroxene Syenite	TIMS	211	5	Guo et al., 2005
29	JZ7	Jiazishan	36.9899	122.481	Pyroxene Syenite	TIMS	209	7	Guo et al., 2005
30	HY02	Heyu pluton, Luanchuan, Henan	33.9923	111.862	Monzogranite	LA-ICP-MS	135	2	Guo et al., 2009b
31	LF04	Huashan pluton, Huayin, Shaanxi	34.4671	109.964	Monzogranite	LA-ICP-MS	134	1	Guo et al., 2009b
32	03R097	Kunyushan	36.9642	121.628	Monzogranite	SHRIMP	160	3	Hu et al., 2004
33	04R134	Kunyushan	36.8914	121.682	Gabbro-Diorite	LA-ICP-MS	113	2	Hu et al., 2007b
34	YCP1	Yechangping, Lushi	34.053	110.746	K-Feldspar Granitic Porphyry	LA-ICP-MS	158	2	Hu et al., 2011
35	YG2	Yanggou pluton, Luonan	34.3025	110.17	Quartz Diorite	LA-ICP-MS	150	1	Hu et al., 2011
36	HS05	Heishan (Xiaxie pluton), Luonan	34.3064	110.151	Quartz Diorite	LA-ICP-MS	149	1	Hu et al., 2011
37	YG13	Yanggou pluton, Luonan	34.3039	110.174	Quartz Monzonite	LA-ICP-MS	149	1	Hu et al., 2011
38	PZG2	Puzhengou pluton, Lushi	34.1785	110.689	Quartz Diorite	LA-ICP-MS	149	1	Hu et al., 2011
39	GLW3	Gelaowan pluton, Lushi	34.1129	110.77	K-Feldspar Granitic Porphyry	LA-ICP-MS	148	1	Hu et al., 2011
40	LG1	Liuguan pluton, Lushi	34.1847	111	K-Feldspar Granitic Porphyry	LA-ICP-MS	132	1	Hu et al., 2011
41	HYY1	Houyaoyu pluton, Lushi	34.2054	111.02	K-Feldspar Granitic Porphyry	LA-ICP-MS	131	1	Hu et al., 2011
42	HS-2	Wengyu, Huashan pluton, Shaanxi	34.4852	110.02	Granite	LA-ICP-MS	205	2	Hu et al., 2012
43	HS-10	Fangshanyu, Huashan pluton, Shaanxi	34.4739	109.964	Granite	LA-ICP-MS	132	1	Hu et al., 2012
44	09OT07	Outang	32.4203	117.99	Monzonitic Diorite	LA-ICP-MS	129.2	4.1	Hu et al., 2014
45	09OT12	Outang	32.4203	117.99	Quartz Monzonite	LA-ICP-MS	124.6	2.9	Hu et al., 2014
46	03SD47	Qibaoshan (Wulian region)	35.8004	119.141	Granite Porphyry	SHRIMP	125	4	Huang et al., 2006
47	03SD47	Qibaoshan (Wulian region)	35.8004	119.141	Granite Porphyry	LA-ICPMS	121	3	Huang et al., 2006
48	03SD73	Dadian	35.3558	118.789	Granite	LA-ICPMS	118	2	Huang et al., 2006
49	02SD76	Shichang	35.6636	119.166	Granite	LA-ICPMS	116	2	Huang et al., 2006
50	B6077	Xishimen	36.8222	114.126	Monzodiorite	LA-ICP-MS	139.52	0.92	Jiang et al., 2020
51	KS0816-1	Xishimen	36.8222	114.126	Monzonite	LA-ICP-MS	135.6	1.1	Jiang et al., 2020
52	TW2595	Xishimen	36.8222	114.126	Monzonite	LA-ICP-MS	126.1	1.6	Jiang et al., 2020
53	TW2832	Xishimen	36.8222	114.126	Monzonite	LA-ICP-MS	124.4	2.1	Jiang et al., 2020
54	B001	Balipo	34.3179	109.947	Granitic Porphyry	LA-ICP-MS	156	2	Jiao et al., 2009
55	JDC	Jinduicheng	34.3289	109.968	Porphyritic Granite	LA-ICP-MS	145	4	Jiao et al., 2010
56	LN	Laoniushan	34.3387	109.94	Porphyritic Granite	LA-ICP-MS	144	3	Jiao et al., 2010
57	15DY01	Dingyuan county, Anhui province	32.4342	117.984	Granodiorite	SHRIMP	131.2	1	Kang et al., 2021
58	15DY02	Dingyuan county, Anhui province	32.4344	117.984	Quartz Syenite	SHRIMP	130.5	1.1	Kang et al., 2021
59	HS-01	Heishan, Luonan	34.3055	109.159	Diorite	LA-ICP-MS	154	2	Ke et al., 2013
60	MLG-06	Mulonggou, Luonan	34.2486	110.327	Granodioritic Porphyry	LA-ICP-MS	151	1	Ke et al., 2013
61	JM-7	Jiangjiazhuang-Daxincun, Moxian	36.5238	120.312	Andesitic Basalt	40Ar-39Ar	122	1.5	Kuang et al., 2012
62	JM-15	Jiangjiazhuang-Daxincun, Moxian	36.5238	120.312	Andesitic Basalt	40Ar-39Ar	122	1.8	Kuang et al., 2012
63	JZ-6	Eastern Jiaozhou	36.3673	120.158	Andesitic Basalt	40Ar-39Ar	119.3	0.5	Kuang et al., 2012
64	QD-3	Baojiashan, Qingdao	36.6763	120.68	Olivine Basalt	40Ar-39Ar	114.9	0.6	Kuang et al., 2012
65	HY-2	Northern Haiyang	36.7262	121.002	Andesitic Basalt	40Ar-39Ar	113	1.3	Kuang et al., 2012
66	07SD74	Longbaoshan	35.0047	117.786	Syenodiorite	LA-ICP-MS	132	1	Lan et al., 2011
67	07SD73	Longbaoshan	35.0047	117.786	Aegirine-Augite Syenite	LA-ICP-MS	130	2	Lan et al., 2011
68	08LX56	Longbaoshan	35.0047	117.786	Hornblende Syenite	LA-ICP-MS	130	1	Lan et al., 2011
69	08LX66	Longbaoshan	35.0047	117.786	Monzonite	LA-ICP-MS	130	1	Lan et al., 2011
70	07SD75	Longbaoshan	35.0047	117.786	Quartz Syenite	LA-ICP-MS	129	1	Lan et al., 2011
71	08LX98	Dadian alkaline complex	35.3831	118.829	Quartz Syenite	LA-ICPMS	125	1	Lan et al., 2011
72	08LX94	Dadian alkaline complex	35.3714	118.928	Syenite	LA-ICPMS	124	1	Lan et al., 2011
73	10LX01	Laiwu	36.3478	117.599	Quartz Monzonite	LA-ICP-MS	130	1	Lan et al., 2013
74	07BB-1	Jingshan, Bengbu	32.9609	117.13	Granite	SIMS	166	2	Li et al., 2010
75	YNG1	Tongjing	35.5904	118.444	Dioritic Ore	SHRIMP	129	4	Li et al., 2011
76	10G11	Gushan, eastern Laizhou	37.1366	120.189	Granite	LA-ICP-MS	120	1	Li et al., 2012c
77	10G07	Gushan, eastern Laizhou	37.1366	120.189	Granite	LA-ICP-MS	119	1	Li et al., 2012c
78	10GS20	Gushan, eastern Laizhou	37.1366	120.189	Mafic Enclave	LA-ICP-MS	119	1	Li et al., 2012c
79	--	Aozhai, Xiong'ershan	34.1562	111.289	Syenogranite	SHRIMP	218	4	Li et al., 2012d
80	ZK0614-705	Wu'an iron ore deposit	36.8822	114.243	Dioritic Porphyry	LA-ICP-MS	134	1	Li et al., 2013a
81	B37-1	Wu'an iron ore deposit	36.8319	114.182	Quartz Monzonite	LA-ICP-MS	131	3	Li et al., 2013a
82	B37-2	Wu'an iron ore deposit	36.8319	114.182	Quartz Monzonite	LA-ICP-MS	127	1	Li et al., 2013a
83	B7	Wu'an iron ore deposit	36.8456	114.141	Diorite	LA-ICP-MS	125	1	Li et al., 2013a
84	LY3-11	Yinjiagou, Lingbao, Henan	34.2156	110.802	Monzogranitic Porphyry	SHRIMP	148	2	Li et al., 2013b
85	LY6-8	Yinjiagou, Lingbao, Henan	34.2156	110.802	Syenogranitic Porphyry	SHRIMP	148	2	Li et al., 2013b
86	LH1-2	Yinjiagou, Lingbao, Henan	34.2156	110.802	Granodioritic Porphyry	SHRIMP	142	2	Li et al., 2013b
87	MJZ-ZC-01	Houkuang Formation	36.0792	119.914	Rhyolite	LA-ICPMS	106	2	Ling et al., 2007
88	MJZ-ZC-02	Shiqianzhuang Formation	36.0933	119.909	Rhyolite	LA-ICPMS	105	4	Ling et al., 2007
89	MMY06-2	Mengyin	35.7495	117.935	Andesitic Volcanic Rocks	LA-ICP-MS	128	2	Ling et al., 2009
90	FJZ10-6	Fanjiazhuang	37.25	121.537	Granite	LA-ICPMS	160.6	1.6	Liu et al., 2020
91	JXZ	Juxian	35.5184	119.041	Granite	SHRIMP	127	2	Liu et al., 2008
92	WLZ	Wulian	35.6036	119.126	Granite	SHRIMP	125	1	Liu et al., 2008
93	JNZ	Junan	34.9803	118.797	Quartz Monzonite	SHRIMP	123	2	Liu et al., 2008
94	DCZ	Dadian	35.2571	118.903	Quartz Monzonite	SHRIMP	122	2	Liu et al., 2008
95	JNMZ	Junan	34.9644	118.826	Diabase Dike	SHRIMP	120	2	Liu et al., 2008
96	JCZ	Jiaonan	35.8822	119.842	Quartz Monzonite	SHRIMP	120	2	Liu et al., 2008
97	JXMZ	Juxian	35.5267	119.036	Diabase Dike	SHRIMP	119	2	Liu et al., 2008
98	QS001	Qibaoshan Formation	35.8531	119.263	Trachyandesite(Adakitic)	LA-ICP-MS	124	1	Liu et al., 2009a
99	B3ZA	Qingshan village, Laixi	37.0726	120.284	Doleritic Porphyry	LA-ICP-MS	127	2	Liu et al., 2009b
100	B1ZA	Qingshan village, Laixi	37.0793	120.29	Doleritic Porphyry	LA-ICP-MS	125	2	Liu et al., 2009b
101	B6ZA	Qingshan village, Laixi	37.0741	120.309	Doleritic Porphyry	LA-ICP-MS	125	1	Liu et al., 2009b
102	B5ZA	Qingshan village, Laixi	37.0772	120.288	Doleritic Porphyry	LA-ICP-MS	124	2	Liu et al., 2009b
103	B4ZA	Qingshan village, Laixi	37.0735	120.286	Doleritic Porphyry	LA-ICP-MS	123	2	Liu et al., 2009b
104	JS-5	Jingshan, Bengbu	32.9438	117.179	Granodiorite	SIMS	118	1	Liu et al., 2012b
105	CHW-1	Changhuawei, Bengbu	32.8938	117.515	Granite	SIMS	112	1	Liu et al., 2012b
106	JS-d8	Jingshan, Bengbu	32.9438	117.179	Mafic Dyke	40Ar-39Ar	111.8	0.6	Liu et al., 2012b
107	JJLL-5	Linglong	37.4403	120.141	Granite	LA-ICPMS	160	3	Ma et al., 2013
108	JJLL-1	Linglong	37.4403	120.141	Granite	LA-ICPMS	158	2	Ma et al., 2013
109	JJLL-2	Linglong	37.4403	120.141	Granite	LA-ICPMS	158	2	Ma et al., 2013
110	JJLL-6	Linglong	37.4403	120.141	Granite	LA-ICPMS	157	3	Ma et al., 2013
111	--	Shangfanggou	33.9199	111.484	Granitic Porphyry	SHRIMP	158	3	Mao et al., 2005
112	--	Nannihu	33.9055	111.501	Granitic Porphyry	SHRIMP	158	3	Mao et al., 2005
113	--	Wuzhangshan pluton, Xiong'ershan	34.153	111.774	Granite	SHRIMP	157	1	Mao et al., 2005
114	--	Niangniangshan	34.4434	110.786	Monzogranite	SHRIMP	142	3	Mao et al., 2005
115	--	Wenyu	34.4496	110.493	Granite	SHRIMP	138	3	Mao et al., 2005
116	--	Leimengou	34.1591	111.907	Granitic Porphyry	SHRIMP	136	2	Mao et al., 2005
117	--	Huashan, Xiong'ershan	34.2958	111.811	Biotite Granite	SHRIMP	131	1	Mao et al., 2005
118	--	Heyu, Xiong'ershan	33.9017	111.894	Biotite Monzogranite	SHRIMP	127	1	Mao et al., 2005
119	20HD-25	Fushan	36.6979	113.749	Diorite	SHRIMP	127	1	Peng et al., 2004
120	20HD-59	Dongye	36.2455	114.004	Diorite	SHRIMP	126	1	Peng et al., 2004
121	F-10	Fenlingshan, Wulian	35.757	119.26	Latite Andesite	40Ar-39Ar	109.9	0.6	Qiu et al., 2001
122	F-10	Fenlingshan, Wulian	35.757	119.26	Trachytic Rhyolite	40Ar-39Ar	108.2	0.6	Qiu et al., 2001
123	My-4	Mengyin	35.735	117.922	Potash-Rich Volcanic Rocks	40Ar-39Ar	124.3	0.6	Qiu et al., 2002
124	Jzy	Zaozhuang	34.9243	117.472	Lamprophyre	40Ar-39Ar	119.6	0.7	Qiu et al., 2002
125	My-6	Mengyin	35.7372	117.93	Potash-Rich Volcanic Rocks	40Ar-39Ar	118.2	0.6	Qiu et al., 2002
126	My-2	Mengyin	35.7504	117.918	Potash-Rich Volcanic Rocks	40Ar-39Ar	117.8	0.6	Qiu et al., 2002
127	My-5	Mengyin	35.7424	117.928	Potash-Rich Volcanic Rocks	40Ar-39Ar	117	0.6	Qiu et al., 2002
128	My-1	Mengyin	35.7554	117.915	Potash-Rich Volcanic Rocks	40Ar-39Ar	114.8	0.6	Qiu et al., 2002
129	JMS-1	Linglong	36.943	120.147	Monzogranite	SHRIMP	160	3	Wang et al., 1998
130	LX-13	Linglong	37.4634	120.521	Monzogranite	SHRIMP	157	4	Wang et al., 1998
131	LJH-1	Luanjiahe	37.4332	120.537	Monzogranite	SHRIMP	154	4	Wang et al., 1998
132	LD-20	Linglong	37.4703	120.556	Granodiorite	SHRIMP	153	4	Wang et al., 1998
133	BG-1	Luanjiahe	37.2451	120.536	Monzogranite	SHRIMP	152	10	Wang et al., 1998
134	TJ-1	Guojialing	37.4881	120.61	Granodiorite	SHRIMP	130	3	Wang et al., 1998
135	MZS-1	Guojialing	37.5167	120.682	Granodiorite	SHRIMP	129	3	Wang et al., 1998
136	SSD-15	Guojialing	37.4003	119.969	Porphyritic Granodiorite	SHRIMP	128	2	Wang et al., 1998
137	NM-1	Guojialing	37.4989	120.473	Monzogranite	SHRIMP	128	6	Wang et al., 1998
138	JH-8	Guojialing	37.4481	120.318	Porphyritic Granodiorite	SHRIMP	126	2	Wang et al., 1998
139	LX-53	Guojialing	37.4577	120.505	Feldspar Porphyry Dyke	SHRIMP	120	2	Wang et al., 1998
140	20HD41	Dongye, Linxian	36.2455	114.004	Gabbro	SHRIMP	125	5	Wang et al., 2006a
141	NN-1	Niangniangshan	34.4434	110.786	Granite	SHRIMP	142	3	Wang et al., 2010
142	YWS-3	Wenyu	34.4496	110.493	Granite	SHRIMP	138	3	Wang et al., 2010
143	07SD155	Tongjing	35.5904	118.444	Porphyritic Diorite	LA-ICP-MS	129	1	Wang et al., 2011b
144	08LX086	Yinshanzhuang	35.605	118.433	Porphyritic Diorite	LA-ICP-MS	128	1	Wang et al., 2011b
145	XA2-1	Xi'anli, Changzhi	35.9686	113.502	Hornblende Gabbro	LA-ICP-MS	131	1	Wang et al., 2011c
146	Q93101	Muhuguan pluton	33.9834	109.718	Monzogranite	LA-ICP-MS	150	1	Wang et al., 2011d
147	73241A	Mangling pluton	33.982	110.045	Porphyritic Monzogranite	SHRIMP	149	2	Wang et al., 2011d
148	Q93105	Lantian pluton	34.0453	109.7	Monzogranite	LA-ICP-MS	133	2	Wang et al., 2011d
149	LNS-5	Kangping, Laoniushan	34.3781	109.754	Granite	LA-ICP-MS	208	1	Wang et al., 2012b
150	B035	Xi'anli	36.0519	113.634	Diorite	SHRIMP	126	2	Wang et al., 2013b
151	LG01	Xi'anli	36.0519	113.634	Gabbro	SHRIMP	123	2	Wang et al., 2013b
152	HP1	Haoping pluton, Xiong'ershan	34.2395	111.638	Granite	LA-ICP-MS	129	1	Xiao et al., 2012
153	HP4	Haoping pluton, Xiong'ershan	34.2411	111.848	Granite	LA-ICP-MS	129	2	Xiao et al., 2012
154	JSM3	Jinshanmiao pluton, Xiong'ershan	34.2709	111.625	Granite	LA-ICP-MS	128	2	Xiao et al., 2012
155	LW-16	Tietonggou, Laiwu	36.0929	117.838	Pyroxene Diorite	40Ar-39Ar	132.8	0.3	Xu et al., 2004a
156	20-001	Xi'anli, Changzhi	36.0519	113.634	Hornblende Diorite	40Ar-39Ar	127.7	0.3	Xu et al., 2004a
157	21-005	Dongye, Anyang	36.2455	114.004	Hornblende Diorite	40Ar-39Ar	127.1	0.1	Xu et al., 2004a
158	FY4-1	Guandian pluton, northern Anhui	32.8391	118.078	Granodiorite	40Ar-39Ar	126.9	0.2	Xu et al., 2004a
159	44952	Taershan, Linfen	35.8668	111.819	Dioritic Porphyry	40Ar-39Ar	124.9	0.3	Xu et al., 2004a
160	TZ-1	Tiezhai, Linju	36.3347	118.322	Syenodioritic Porphyry	40Ar-39Ar	124.9	0.2	Xu et al., 2004a
161	MY1-1	Hutouya, Mengyin	35.6951	117.883	Granodioritic Porphyry	40Ar-39Ar	124.4	0.3	Xu et al., 2004a
162	LJ-1	Liujing, Zaozhuang	34.7982	117.746	Granodioritic Porphyry	40Ar-39Ar	124.9	0.2	Xu et al., 2004a
163	JG25	Jiagou intrusion, northwestern Suzhou	33.938	116.961	Monzodioritic Porphyry	SHRIMP	132	4	Xu et al., 2004b
164	LG1	Liguo intrusion, northern Xuhzou	34.5313	117.376	Dioritic Porphyry	SHRIMP	131	3	Xu et al., 2004b
165	BB4	Jingshan pluton, Bengbu	32.8694	117.233	Granite	SHRIMP	160	1	Xu et al., 2005
166	YN-14	Yinshanzhuang, Yi'nan	35.6087	118.432	Diorite	SHRIMP	132	2	Xu et al., 2007
167	YN-8	Chaoyang, Yi'nan	35.6286	118.505	Diorite	SHRIMP	129	3	Xu et al., 2007
168	YN-31	Yi'nan	35.4461	118.322	Gabbro	SHRIMP	127	2	Xu et al., 2007
169	YN-13	Tongjing, Yi'nan	35.5904	118.444	Diorite	SHRIMP	126	3	Xu et al., 2007
170	FS-6	Fushan	36.6979	113.749	Diorite	LA-ICP-MS	125	1	Xu et al., 2009
171	JN2,JN3,JN4	Queshan, Huashan, Yaoshan, Ji'nan	36.7123	116.959	Gabbro	SHRIMP	131	2	Yang et al., 2005
172	JN-k	Kuangshan, Ji'nan	36.6395	116.902	Gabbro	SHRIMP	127	2	Yang et al., 2005
173	LW10-1	Tietonggou, Laiwu	36.0929	117.838	Pyroxene Diorite	LA-ICP-MS	135	2	Yang et al., 2006c
174	LW10-7	Tietonggou, Laiwu	36.0929	117.838	Norite-Diorite	LA-ICP-MS	131	5	Yang et al., 2006c
175	X-15	Quli, Sanmenxia	34.8341	111.434	Quartz Dioritic Porphyry	SHRIMP	118	2	Yang et al., 2006d
176	LX-HBJ-6	Huangbanjiagou	41.6153	120.836	Tuff	SHRIMP	122.8	1.6	Yang et al., 2007d
177	LX-SHT-12	Sihetun	41.5881	120.791	Tuff	SHRIMP	124.7	2.7	Yang et al., 2007d
178	LX-HBJ-1	Huangbanjiagou	41.6167	120.83	Tuff	SHRIMP	124.9	1.7	Yang et al., 2007d
179	QT-9	Shangyu, Mengyin	35.7619	118.088	Gabbro-Diorite	SHRIMP	134	2	Yang et al., 2008b
180	QT-1	Shangyu, Mengyin	35.7619	118.088	Gabbro-Diorite	SHRIMP	129	1	Yang et al., 2008b
181	C5	Caishan, Bengbu	33.833	116.822	Quartz Dioritic Porphyry	LA-ICP-MS	131	1	Yang et al., 2008c
182	HF1	Fengshan, Bengbu	33.8623	116.934	Monzodioritic Porphyry	LA-ICP-MS	129	2	Yang et al., 2008c
183	BJ-1	Banjing, Bengbu	34.1548	117.142	Dioritic Porphyry	LA-ICP-MS	127	1	Yang et al., 2008c
184	BJ-2	Banjing, Bengbu	34.1548	117.142	Hornblende Dioritic Porphyry	LA-ICP-MS	127	1	Yang et al., 2008c
185	BB1	Huaiguang, Bengbu	32.944	117.507	Granodiorite	SHRIMP	130	2	Yang et al., 2010
186	BB-9	Nüshan, Bengbu	33.0538	117.87	Syenogranite	LA-ICP-MS	130	3	Yang et al., 2010
187	BB7	Xilushan, Bengbu	32.8458	117.445	Syenogranite	LA-ICP-MS	129	5	Yang et al., 2010
188	BB2	Caoshan	32.9327	117.457	Monzogranite	LA-ICP-MS	112	2	Yang et al., 2010
189	08G33	Linglong	37.4002	119.956	Granite	LA-ICPMS	159	2	Yang et al., 2012c
190	08G59	Linglong	36.8825	119.958	Granite	LA-ICPMS	159	1	Yang et al., 2012c
191	08G40	Luanjiahe	37.2396	120.227	Granite	LA-ICPMS	158	2	Yang et al., 2012c
192	08G42	Luanjiahe	37.2066	120.03	Granite	LA-ICPMS	157	2	Yang et al., 2012c
193	08G32	Guojialing	37.4002	119.956	Granodiorite	LA-ICPMS	129	1	Yang et al., 2012c
194	08G37	Guojialing	37.4044	120.195	Granodiorite	LA-ICPMS	129	1	Yang et al., 2012c
195	QYG16-5	Qiyugou	34.2025	111.957	Granitic Porphyry	LA-ICP-MS	134	2	Yao et al., 2009
196	DG-B5	Donggou pluton	33.95	112.38	Granitic Porphyry	SHRIMP	112	1	Ye et al., 2006
197	TSM5	Taishanmiao pluton	33.8186	111.253	Alkali-Feldspar Granite	SHRIMP	115	2	Ye et al., 2008
198	EFS08-8	Erfengshan, Linfen	35.8267	111.788	Quartz Monzonite	LA-ICP-MS	134	2	Ying et al., 2011
199	WHS08-2	Huyanshan, Taiyuan	37.8086	112.073	Monzonite	LA-ICP-MS	130	2	Ying et al., 2011
200	EFS08-1	Erfengshan, Linfen	35.8267	111.788	Quartz Monzonite	LA-ICP-MS	128	1	Ying et al., 2011
201	Jd10	Yushan	37.163	120.994	Monzogranite	SHRIMP	157	2	Zhang and Z, 2007
202	Jd05	Haiyang	36.8494	121.324	Monzogranite	SHRIMP	115	2	Zhang and Z, 2007
203	S432	Queshan	37.1872	121.368	Quartz Monzonite	LA-ICP-MS	156	2	Zhang and Z, 2008
204	S421	Queshan	37.1598	121.459	Monzogranite	LA-ICP-MS	154	1	Zhang and Z, 2008
205	S391	Kunyushan	37.3438	121.758	Monzogranite	LA-ICP-MS	152	1	Zhang and Z, 2008
206	C1	Linglong	37.3458	119.922	Granodiorite	SHRIMP	166	4	Zhang et al., 2003
207	C3	Linglong	37.3458	119.922	Ore	SHRIMP	154	5	Zhang et al., 2003
208	Sh39	Yashan	37.2178	121.075	Granite	SHRIMP	118	3	Zhang et al., 2007
209	Sh39	Yashan	37.2178	121.075	Granite	40Ar-39Ar	116.9	0.7	Zhang et al., 2007
210	Sh107	Yuangezhuang	37.3407	121.437	Granite	40Ar-39Ar	116.8	1.4	Zhang et al., 2007
211	Sh33	Zhuwu, Haiyang	36.8669	121.211	Granite Dyke	SHRIMP	116	3	Zhang et al., 2007
212	Sg107	Yuangezhuang	37.3407	121.437	Granite	SHRIMP	113	3	Zhang et al., 2007
213	LN1	Lianhuagou, Luonan	34.0183	110.439	Diorite	LA-ICP-MS	148	2	Zhang et al., 2008a
214	JD06-2	Northeast Jiaolai Basin	36.966	121.257	Basaltic Volcanic Rocks	SHRIMP	129	2	Zhang et al., 2008b
215	Sh-115	Haiyang	36.8952	120.844	Basalt Dyke	40Ar-39Ar	119.2	0.6	Zhang et al., 2008b
216	Sh-63	Haiyang	36.8985	120.847	Basalt Dyke	40Ar-39Ar	117.1	0.8	Zhang et al., 2008b
217	Sh-23	Haiyang	36.9359	121.149	Basalt Dyke	40Ar-39Ar	116.8	0.7	Zhang et al., 2008b
218	Sh-46	Haiyang	36.6536	120.97	Volcanic Rock	40Ar-39Ar	115.2	3.9	Zhang et al., 2008b
219	JN-47	Juxian	35.5772	118.932	Volcanic Rock	40Ar-39Ar	111	0.8	Zhang et al., 2008b
220	Jn-59	Juxian	35.4009	119.024	Volcanic Rock	40Ar-39Ar	110.4	1.6	Zhang et al., 2008b
221	Sh-33	Haiyang	36.9342	121.07	Basalt Dyke	40Ar-39Ar	110.6	1	Zhang et al., 2008b
222	Sh-26	Haiyang	36.9238	121.126	Basalt Dyke	40Ar-39Ar	106.7	0.9	Zhang et al., 2008b
223	06SD39	Linglong	37.5972	121.047	Granite	LA-ICP-MS	157	2	Zhang et al., 2010
224	06SD12	Kunyushan	37.1753	121.629	Granite	LA-ICP-MS	149	5	Zhang et al., 2010
225	06SD52	Linglong	37.4508	120.49	Granite	LA-ICP-MS	147	3	Zhang et al., 2010
226	06SD28	Kunyushan	37.1775	121.385	Granite	LA-ICP-MS	146	4	Zhang et al., 2010
227	06SD73	Guojialing	36.9008	120.085	Granite	LA-ICP-MS	133	3	Zhang et al., 2010
228	06SD36	Guojialing	37.5425	120.898	Quartz Monzonite	LA-ICP-MS	121	8	Zhang et al., 2010
229	06SD64	Guojialing	37.22	120.166	Granite	LA-ICP-MS	111	2	Zhang et al., 2010
230	00DP01	Dalincun	35.2997	119.189	Gabbro	LA-ICPMS	129	1	Zhang et al., 2012c
231	00XHY02	Xiaohuayuancun	35.4169	119.225	Hornblendite	LA-ICPMS	124	2	Zhang et al., 2012c
232	00DP02	Dalincun	35.2997	119.189	Monzogranite	LA-ICPMS	124	1	Zhang et al., 2012c
233	00SD47	Wulian	35.6675	119.224	Gabbro	LA-ICPMS	123	2	Zhang et al., 2012c
234	00XHY05	Aiguocun	35.3894	119.195	Diorite	LA-ICPMS	123	2	Zhang et al., 2012c
235	00SD07	Zhonglouxiang	35.4411	119.043	Monzogranite	LA-ICPMS	120	2	Zhang et al., 2012c
236	00SD04	Liangshan	35.3933	119.043	Monzogranite	LA-ICPMS	119	4	Zhang et al., 2012c
237	00SD02	Liangshan	35.3925	119.046	Monzogranite	LA-ICPMS	113	2	Zhang et al., 2012c
238	00SD10	Zhonglouxiang	35.6083	118.934	Hornblendite	LA-ICPMS	111	3	Zhang et al., 2012c
239	ZB2	Shaolingou, Huanglongpu	34.3549	110.033	Granitic Porphyry	SHRIMP	131	1	Zhao et al., 2010
240	HB1	Shaolingou, Huanglongpu	34.3699	110.04	Diabase	SHRIMP	129	2	Zhao et al., 2010
241	HS-17	Hongshan, Handan	36.7413	114.424	Syenite	SHRIMP	135	3	Zhou and Chen, 2006
242	ZHTW1	Qibaoshan	35.8501	119.076	Pyroxene Monzonite	TIMS	126	3	Zhou et al., 2003
243	DaTW1	Dadian	35.4285	118.906	Hornblende Monzonite	TIMS	123	4	Zhou et al., 2003
244	HTW1	Wulianshan	35.6884	119.381	Granite	TIMS	116	4	Zhou et al., 2003
245	HTW2	Maershan	35.6719	119.243	Monzogranite	TIMS	115	1	Zhou et al., 2003
246	DB13-1	Huangshan pluton	32.8802	113.442	Monzogranite	LA-ICP-MS	133	1	Zhou et al., 2008
247	DB18-1	Zushiding pluton	33.0316	113.42	Monzogranite	LA-ICP-MS	132	1	Zhou et al., 2008
248	DB16-1	Jiaozishan pluton	33.0594	113.569	Monzogranite	LA-ICP-MS	121	1	Zhou et al., 2008
249	M0601	Laoniushan	34.3377	109.963	Monzogranite	LA-ICP-MS	146	1	Zhu et al., 2008
250	JD01	Jinduicheng	34.3301	109.955	Granitic Porphyry	LA-ICP-MS	141	1	Zhu et al., 2008
251	--	Mengyin	35.7198	117.841	Andesitic Volcanic Rocks	LA-ICP-MS	136	1	Zhu et al., 2010
252	TYS70	Mengyin	35.7403	117.933	Trachyandesite	LA-ICPMS	134	4	Zhu et al., 2010
253	TYS17	Yishu	36.2364	119.108	Trachyandesite	LA-ICPMS	124	1	Zhu et al., 2010
254	TYS75	Yishu	35.6419	118.953	Trachyte	LA-ICPMS	124	1	Zhu et al., 2010
255	TYS74	Mengyin	35.6844	117.987	Andesite	LA-ICPMS	122	1	Zhu et al., 2010
256	--	Mengyin	35.5853	118.058	Andesitic Volcanic Rocks	LA-ICP-MS	122	1	Zhu et al., 2010
257	TYS04	Yishu	36.6511	119.278	Rhyolite	LA-ICPMS	122	1	Zhu et al., 2010
258	TYS78	Yishu	35.5417	118.92	Trachyte	LA-ICPMS	122	2	Zhu et al., 2010
259	TYS63	Yishu	35.9403	118.699	Rhyolite	LA-ICPMS	120	1	Zhu et al., 2010
260	TYS48	Yishu	35.8019	119.099	Trachyte	LA-ICPMS	120	1	Zhu et al., 2010
261	TYS52	Yishu	35.8861	119.068	Trachyandesite	LA-ICPMS	119	1	Zhu et al., 2010
262	TYS66	Yishu	35.8806	118.671	Trachyandesite	LA-ICPMS	118	2	Zhu et al., 2010
263	TYS15	Yishu	36.2456	119.107	Trachyte	LA-ICPMS	117	1	Zhu et al., 2010
264	TYS83	Yishu	35.2697	118.807	Trachyte	LA-ICPMS	116	1	Zhu et al., 2010
265	LY-33/1	Sigezhuang	39.1621	114.796	Syenogranite	LA-ICP-MS	133.1	0.5	Xue et al., 2021--Lithos
266	LY-42/1	Sigezhuang	39.3177	114.867	Monzonite	LA-ICP-MS	131.9	0.9	Xue et al., 2021--Lithos
267	LY-36/1	Sigezhuang	39.1883	114.856	Syenogranite	LA-ICP-MS	129.9	1	Xue et al., 2021--Lithos
268	LYN-1/3	Sigezhuang	39.2305	114.748	Monzogranite	LA-ICP-MS	128.2	0.7	Xue et al., 2021--Lithos
269	LY-21/1	Sigezhuang	39.2651	114.699	Quartz monzonite	LA-ICP-MS	127.9	0.6	Xue et al., 2021--Lithos
270	LY34/1	Laiyuan	39.1619	114.798		LA-ICP-MS	130.6	1	Xue et al., 2019--Lithos
271	LYN-1/4	Laiyuan	39.2305	114.748		LA-ICP-MS	126.9	0.8	Xue et al., 2019--Lithos
272	LY-15/1	Laiyuan	39.5098	114.996		LA-ICP-MS	125.2	1	Xue et al., 2019--Lithos
273	LYN-4/1	Laiyuan	39.2584	114.787		LA-ICP-MS	123.5	0.9	Xue et al., 2019--Lithos
274	LY-18/1	Laiyuan	39.4793	114.951		LA-ICP-MS	122.5	1.2	Xue et al., 2019--Lithos
275	LY-26/1	Laiyuan	39.2289	114.78		LA-ICP-MS	120.2	0.8	Xue et al., 2019--Lithos
276	LY-16/2	Laiyuan	39.4873	114.975		LA-ICP-MS	116.6	0.7	Xue et al., 2019--Lithos
277	LY-16/1	Laiyuan	39.4873	114.975		LA-ICP-MS	114.5	1	Xue et al., 2019--Lithos
278	LYN-1/1	Laiyuan	39.2305	114.748		LA-ICP-MS	112.8	1.3	Xue et al., 2019--Lithos
279	LY-8/1	Laiyuan	39.3976	114.858		LA-ICP-MS	112.2	0.9	Xue et al., 2019--Lithos
280	LYN-2/1	Laiyuan	39.2304	114.751		LA-ICP-MS	111	1.2	Xue et al., 2019--Lithos

## Sheet: Yanshan Mountains (YSM)
Order	Sample	GPS location		Pluton	Lithology	Method	Age (Ma)		References
							206Pb/238U or 207Pb/206Pb	Error
	Yanshan Fold Belt
1	ZKD	39.6911	115.948	Fangshan pluton, western Beijing	Granodiorite	SHRIMP	130.7	1.4	Cai et al., 2005
2	CW-15	39.4091	114.942	Wang’anzhen pluton	Mafic Microgranular Enclave	SHRIMP	126	3	Chen et al., 2007
3	10095-1	41.0429	116.634	Yunwushan, Fengning	Monzogranite	LA-ICP-MS	247	2	Zhang et al., 2014--ESR
4	10097-1	40.9484	116.624	Yunwushan, Fengning	Monzogranite	LA-ICP-MS	244	2	Zhang et al., 2014--ESR
5	D478	41.0683	116.767	Jizhazi, Fengning	Monzogranite	LA-ICP-MS	229	5	Zhang et al., 2014--ESR
6	07D006-1	42.0904	119.057	Zhoujiawopu, SE Chifeng	Quartz Trachyandesite	LA-ICP-MS	169	1	Zhang et al., 2014--ESR
7	07D010-1	42.099	119.126	Zhoujiawopu, SE Chifeng	Quartz Monzodiorite	LA-ICP-MS	159	2	Zhang et al., 2014--ESR
8	07D046-1	42.5022	118.788	Jianchang, NW Chifeng	Dioritic Porphyrite	LA-ICP-MS	171	3	Zhang et al., 2014--ESR
9	1021			Qianzhangzi, Pingquan	Syenite	SHRIMP	164	4	Zhang et al., 2014--ESR
10	HPQ020817			Qianzhangzi, Pingquan	Diorite	SHRIMP	166	2	Zhang et al., 2014--ESR
11	SGD-1	40.4761	117.121	Siganding, Miyun	Quartz Monzodiorite	SHRIMP	160	5	Zhang et al., 2014--ESR
12	LLX020811			Xingzhangzi, Lingyuan	Quartz Porphyry	SHRIMP	165	2	Zhang et al., 2014--ESR
13	08005-4	40.5563	117.749	Shouwangfen, Xinglong	Andesite	LA-ICP-MS	161	2	Zhang et al., 2014--ESR
14	08008-1	40.7441	118.146	Chengde county	Dioritic Porphyrite	LA-ICP-MS	159	2	Zhang et al., 2014--ESR
15	08170-2	42.3011	120.273	Peijiadian, East Chifeng	Rhyolitic Tuff	LA-ICP-MS	162	2	Zhang et al., 2014--ESR
16	09018-1	40.4345	118.518	Nianziyu, Kuancheng	Diorite	LA-ICP-MS	165	2	Zhang et al., 2014--ESR
17	09061-1	42.0207	120.48	Chengjiawopu, NW Beipiao	Quartz Monzonite	LA-ICP-MS	164	1	Zhang et al., 2014--ESR
18	09064-1	42.302	120.277	Nantaxiang, East Chifeng	Rhyolite	LA-ICP-MS	164	3	Zhang et al., 2014--ESR
19	09075-1	42.5648	119.653	East Laohahe, East Chifeng	Rhyolitic Tuff	LA-ICP-MS	163	2	Zhang et al., 2014--ESR
20	D078-2	41.025	117.077	Lingying, Fengning	Dacite	LA-ICP-MS	156	4	Zhang et al., 2014--ESR
21	10036-1	40.7298	118.129	Chengde county	Dioritic Porphyrite	LA-ICP-MS	161	2	Zhang et al., 2014--ESR
22	07D044-1	42.5607	118.464	Gangzi, NW Chifeng	Quartz Syenite Porphyry	LA-ICP-MS	138	2	Zhang et al., 2014--ESR
23	09043-1	41.2121	119.652	Liuguanyingzi, Lingyuan	Dioritic Porphyrite	LA-ICP-MS	124	2	Zhang et al., 2014--ESR
24	10018-1	40.598	117.893	Shouwangfen, Xinglong	Quartz Diorite	LA-ICP-MS	133	1	Zhang et al., 2014--ESR
25	10096-1	41.0178	116.633	Yunwushan, Fengning	Granodiorite	LA-ICP-MS	138	1	Zhang et al., 2014--ESR
26	08005-1	40.5575	117.749	Shouwangfen, Xinglong	Andesite Porphyrite	LA-ICP-MS	128	1	Zhang et al., 2014--ESR
27	10002-1	40.1439	117.596	Sungezhuang, Jixian	Syenite	LA-ICP-MS	231	1	Zhang et al., 2012a
28	10003-1	40.1422	117.597	Sungezhuang, Jixian	Syenite	LA-ICP-MS	231	1	Zhang et al., 2012a
29	10013-1	40.1469	117.599	Sungezhuang, Jixian	Syenite	LA-ICP-MS	231	2	Zhang et al., 2012a
30	9668	--	--	Sungezhuang	Syenite	SHRIMP	226	1	Cai et al., 2011
31	--	--	--	Hekanzi	Nepheline Syenite	LA-ICP-MS	227	2	Wu et al., 2008
32	05FW52	40.6641	119.251	Hekanzi	Pyroxene Syenite	LA-ICP-MS	226	3	Yang et al., 2012a
33	05FW46	40.6641	119.251	Hekanzi	Pyroxene Syenite	LA-ICP-MS	225	3	Yang et al., 2012a
34	05FW50	40.6641	119.251	Hekanzi	Nepheline Syenite	LA-ICP-MS	226	2	Yang et al., 2012a
35	05FW50	40.6641	119.251	Hekanzi	Nepheline Syenite	SIMS	225	2	Yang et al., 2012a
36	05FW45	40.6641	119.251	Hekanzi	Nepheline Syenite	LA-ICP-MS	224	2	Yang et al., 2012a
37	06Jh62	--	--	Liangjia	Quartz Syenite	LA-ICP-MS	246	2	Yang et al., 2012a
38	06JH126	--	--	Jianfang	Quartz Syenite	LA-ICP-MS	254	2	Yang et al., 2012a
39	--	--	--	Guangtoushan	Alkaline Granite	TIMS	220	1	Han et al., 2004
40	GSJ2			Jinchanggouliang	Mafic Dyke	LA-ICP-MS	227	1	Fu et al., 2012
41	GTS09-1	--	--	Guangtushan	Granite	LA-ICP-MS	250	2	Zhang et al., 2012b
42	GTS09-2	--	--	Guangtushan	Enclave	LA-ICP-MS	250	2	Zhang et al., 2012b
43	GTS09-4	41.3148	118.513	Guangtushan	Granite	LA-ICP-MS	208	1	Zhang et al., 2012b
44	GTS09-5	41.3148	118.513	Guangtushan	Enclave	LA-ICP-MS	206	2	Zhang et al., 2012b
45	GTS09-6	41.3148	118.513	Guangtushan	Leucogranite	LA-ICP-MS	207	3	Zhang et al., 2012b
46	DL7	--	--	Dalugou, Ningcheng	Cumulate	SHRIMP	227	1	Shao and Yang, 2011a
47	HNY1	--	--	Henanyingzi, Ningcheng	Granulite	SHRIMP	231	3	Shao and Yang, 2011a
48	HNY2	--	--	Henanyingzi, Ningcheng	Diorite	SHRIMP	221	3	Shao and Yang, 2011a
49	DB107-2	--	--	Tielouzi, Badaling	Monzogranite	LA-ICP-MS	137	1	Jiao et al., 2013
50	DB101	--	--	Huanghuacheng, Badaling	Porphyritic Granite	LA-ICP-MS	133	1	Jiao et al., 2013
51	DB104	--	--	Fenshuiling, Badaling	Granite	LA-ICP-MS	129	1	Jiao et al., 2013
52	FK04-19	--	--	Faku, western Liaoning	Monzodiorite	SHRIMP	261	2	Zhang et al., 2010b
53	FK04-24	--	--	Faku, western Liaoning	Granite	LA-ICP-MS	249	2	Zhang et al., 2010b
54	FK06-39	42.3642	123.453	Faku, western Liaoning	Quartz Monzonite	LA-ICP-MS	248	2	Zhang et al., 2010b
55	H-104	--	--	Daijiagou	Perlitic Glassy Tuff	40Ar-39Ar	127.2	1.5	Davis et al., 2001
56	280	40.8039	119.662	Jianchang	Andesite	40Ar-39Ar	173	6	Davis et al., 2001
57	191	40.9481	117.932	Chengde	Trachyte	40Ar-39Ar	122.5	5.5	Davis et al., 2001
58	PRC-21	40.8355	118.425	Guozhangzi	Granitoid Pluton	TIMS	111	4	Davis et al., 2001
59	PRC-14	40.0375	115.997	Shangweidian	Granodiorite	40Ar-39Ar	135.2	3.8	Davis et al., 2001
60	PRC-5	40.4507	116.738	Shimenshan	Granitoid Pluton	TIMS	143	3	Davis et al., 2001
61	PRC-6	40.5084	116.823	Yunmengshan	Granitoid Pluton	TIMS	143	3	Davis et al., 2001
62	PRC-19	40.9509	117.881	Daguikou	Granitoid Pluton	TIMS	117	3	Davis et al., 2001
63	PRC-8	40.5605	116.853	Beishicheng	Granitoid Pluton	TIMS	159	2	Davis et al., 2001
64	PRC-1	40.5938	116.877	Shatuozi	Granitoid Pluton	TIMS	151	2	Davis et al., 2001
65	PRC-7	40.3381	116.51	Changyuan	Granitoid Pluton	TIMS	151	2	Davis et al., 2001
66	PRC-4	40.5138	116.738	Yunmengshan	Granitoid Pluton	TIMS	142	2	Davis et al., 2001
67	PRC-3	40.4617	116.642	Wudaohe	Granitoid Pluton	TIMS	141	2	Davis et al., 2001
68	PRC-23	39.4091	114.942	Wanganzhen	Granitoid Pluton	TIMS	136	2	Davis et al., 2001
69	PRC-2	40.577	116.754	Dadonggou	Granitoid Pluton	TIMS	127	2	Davis et al., 2001
70	PRC-17	40.3848	115.678	Dahaituo	Granitoid Pluton	TIMS	119	2	Davis et al., 2001
71	PRC-20	40.8218	118.326	Jiashan	Granitoid Pluton	TIMS	113	2	Davis et al., 2001
72	B-106	40.2505	116.312	Shisanling	Andesite	40Ar-39Ar	161.1	1.9	Davis et al., 2001
73	H-220	40.7517	117.979	Huangtuling	Andesite	40Ar-39Ar	147.6	1.6	Davis et al., 2001
74	PRC-14	40.0375	115.997	Shangweidian	Granitoid Pluton	TIMS	138.2	1.5	Davis et al., 2001
75	PRC-12	40.5251	117.763	Wulingshan	Granitoid Pluton	TIMS	131.7	1.5	Davis et al., 2001
76	PRC-13	40.668	117.859	Panjiadian	Granitoid Pluton	TIMS	130	1.5	Davis et al., 2001
77	PRC-16	39.7634	115.836	Nanjiao	Granitoid Pluton	TIMS	128.4	1.5	Davis et al., 2001
78	PRC-10	39.7613	115.922	Fangshan	Granitoid Pluton	TIMS	128.5	1.5	Davis et al., 2001
79	PRC-11	40.874	117.672	Wulingshan	Granitoid Pluton	TIMS	128.8	1.5	Davis et al., 2001
80	H-104	40.3076	115.267	Daijiagou	Perlitic Glassy Tuff	40Ar-39Ar	127.2	1.5	Davis et al., 2001
81	PRC-9	40.2777	116.403	Xuejiashiliang	Granitoid Pluton	TIMS	127	1.5	Davis et al., 2001
82	PRC-15	40.1019	116.092	Yangfang	Granitoid Pluton	TIMS	118	1.5	Davis et al., 2001
83	PRC-9	40.3356	116.397	Xuejiashiliang	Diorite	40Ar-39Ar	125.8	1.3	Davis et al., 2001
84	96-169	40.819	118.267	Zhangjiadian	Lithic Tuff	40Ar-39Ar	160.7	0.8	Davis et al., 2001
85	CH99-5 Bio	40.725	118.03	Chengde, Hebei	Biotite Tuff	40Ar-39Ar	127.4	1	Cope, 2003
86	CH99-9 Hbl	40.835	119.473	Lingyuan, Liaoning	Hornblende Microdiorite	40Ar-39Ar	155.6	0.6	Cope, 2003
87	CH99-12 Bio	40.585	118.363	Chengde, Hebei	Biotite Rhyolite	40Ar-39Ar	158.7	0.4	Cope, 2003
88	CH99-14 Bio	40.7454	118.145	Chengde, Hebei	Dioritic Porphyry Dyke	40Ar-39Ar	166.3	1.2	Cope, 2003
89	99CH-23 Bio	40.9167	118.233	Chengde, Hebei	Volcanic Cobble	40Ar-39Ar	241	0.8	Cope, 2003
90	00LP606 Bio	40.8667	117.281	Luanping, Hebei	Rhyolitic Welded Tuff	40Ar-39Ar	130.8	0.5	Cope, 2003
91	00CH721 Hbl	40.7939	118.109	Chengde, Hebei	Andesite	40Ar-39Ar	159.7	1.3	Cope, 2003
92	00CH722 Kf	40.8021	118.092	Chengde, Hebei	Rhyolitic Tuff	40Ar-39Ar	152.6	0.3	Cope, 2003
93	01LY160	40.9367	119.242	Shuiquangou Formation, Lingyuan	Andesite	40Ar-39Ar	219.4	1	Cope, 2003
94	00CH707	40.0246	118.248	Chengde, Hebei	Vitric Tuff	SHRIMP	154	4	Cope, 2003
95	01CH16	40.9117	118.23	Chengde, Hebei	Vitric Tuff	SHRIMP	156	1	Cope, 2003
96	FSG01	--	--	Western Liaoning	Basaltic Porphyry	LA-ICP-MS	223	1	Feng et al., 2012
97	09DB-3	--	--	Shuiquangou Formation, Lingyuan	Trachyte	LA-ICP-MS	249	2	Ma et al., 2012
98	09BGB-12	--	--	Shuiquangou Formation, Lingyuan	Pyroxene Andesite	LA-ICP-MS	248	2	Ma et al., 2012
99	--	--	--	Tiaojishan Formation, Chengde	Andesite	SHRIMP	154	4	Davis, 2005
100	CD01-19	40.901	117.87	Yixian Formation, Chengde	Rhyolite	SHRIMP	122	2	Niu et al., 2004
101	C-49	40.89	117.497	Haiying, Luanping	Amygdaoidal Andesite	SHRIMP	134	1	Niu et al., 2004
102	CDM1	40.6593	118.154	Luotuanshan, Chengde	Ignimbrite	SHRIMP	129	1	Niu et al., 2004
103	C34	40.8836	118.081	Luotuanshan, Chengde	Congomeratic Crystal-Lithic Tuff	SHRIMP	126	3	Niu et al., 2004
104	XBC10	40.7575	118.061	Tiaojishan Formation, Chengde	Crystal Tuff	LA-ICP-MS	153	1	Liu et al., 2006
105	XBC09	40.7436	118.073	Tiaojishan Formation, Chengde	Trachyandesite	LA-ICP-MS	156	3	Liu et al., 2006
106	XL31	41.704	120.674	Xinglonggou, Beipiao	Rhyolite	SHRIMP	159	3	Gao et al., 2004
107	XL34	41.704	120.674	Xinglonggou, Beipiao	Rhyolite	SHRIMP	159	4	Gao et al., 2004
108	XL03	41.704	120.674	Xinglonggou, Beipiao	High-Mg Adakite	SHRIMP	144	9	Gao et al., 2004
109	J32H	--	--	Zhangjiagoumen, Luanping, Chengde	Rhyolite	SHRIMP	135	2	Liu et al., 2003
110	--	--	--	Daohugou, Ningcheng	Trachybasalt	SHRIMP	152	3	Liu et al., 2004
111	--	--	--	Daohugou, Ningcheng	Quartz Trachyandesite	SHRIMP	164	3	Liu et al., 2004
112	--	--	--	Daohugou, Ningcheng	Trachyandesite	SHRIMP	166	1	Ji, 2004
113	--	--	--	Daohugou, Ningcheng	Rhyolite	SHRIMP	165	2	Ji, 2004
114	--	--	--	Jingshang, Luanping	Rhyolite	40Ar-39Ar	135.3	1.4	Ji, 2004
115	--	--	--	Daohugou, Ningcheng	Trachytic Welded Tuff	40Ar-39Ar	164.2	2.5	Chen et al., 2004
116	--	--	--	Daohugou, Ningcheng	Trachyte	SHRIMP	165	2	Chen et al., 2004
117	JC11-1a	40.8676	119.982	Linglongta, Jianchang	Tuff	SIMS	161	2	Wang et al., 2013a
118	JC11-6	40.8652	119.998	Linglongta, Jianchang	Tuff	SIMS	160	2	Wang et al., 2013a
119	JC11-4	40.8653	119.975	Linglongta, Jianchang	Tuff	SIMS	159	2	Wang et al., 2013a
120	091003-1	40.6831	119.765	Lanqi Formation, Jianchang	Tuff	SHRIMP	161	1	Liu et al., 2012
121	091003-2	40.8986	119.985	Lanqi Formation, Jianchang	Tuff	SHRIMP	161	1	Liu et al., 2012
122	091002-2	40.9494	120.049	Lanqi Formation, Jianchang	Tuff	SHRIMP	159	2	Liu et al., 2012
123	LQ07-1	41.8428	120.777	Lanqi Formation, Beipiao	Tuff	40Ar-39Ar	160.7	0.4	Chang et al., 2009
124	LQ07-2	41.8428	120.777	Lanqi Formation, Beipiao	Tuff	40Ar-39Ar	158.7	0.6	Chang et al., 2009
125	BPC-15	--	--	Lanqi Formation, Beipiao	Andesitic Breccia Lava	LA-ICP-MS	159	3	Ma and Zheng, 2009
126	LX01-57	41.5971	120.802	Sihetun, Beipiao	Basaltic Andesite	40Ar-39Ar	126.1	0.4	Chen et al., 2005a
127	LX01-45	41.5971	120.802	Sihetun, Beipiao	Sub-Volcanic Rocks	40Ar-39Ar	122.1	2.6	Chen et al., 2005a
128	LX02-9	41.5971	120.802	Sihetun, Beipiao	Tuff	SHRIMP	125	2	Chen et al., 2005a
129	XZ-6	39.5209	114.995	Xiaozhuang, Wang'anzhen pluton	Monzonite	SHRIMP	129	3	Chen et al., 2005b
130	DH-9	39.7921	115.241	Mangshikou, Dahenan pluton	Quartz Monzonite	SHRIMP	127	3	Chen et al., 2005b
131	WA-3	39.3421	115.122	Longmengou, Wang'anzhen pluton	Gabbroic Diorite	SHRIMP	138	2	Chen et al., 2005b
132	WA-14	39.3845	114.847	Dongyanglan, Wang'anzhen pluton	Quartz Monzonite	SHRIMP	132	2	Chen et al., 2005b
133	LLXJ2-3	40.9922	119.302	Xingzhangzi, Lingyuan	Tuff	SHRIMP	158	1	Zhao et al., 2004
134	LLXJ2-4	40.9922	119.302	Xingzhangzi, Lingyuan	Andesitic Breccia	SHRIMP	158	1	Zhao et al., 2004
135	L3013	41.32	119.24	Daohugou, Ningcheng	Ignimbrite	40Ar-39Ar	159.8	0.8	He et al., 2004a
136	L3001	41.59	120.38	Shangheshou, Chaoyang	Volcanic Ash	40Ar-39Ar	120.1	0.5	He et al., 2004b
137	L3001	41.59	120.38	Shangheshou, Chaoyang	Volcanic Ash	SHRIMP	124	4	He et al., 2004b
138	Lx9	41.59	120.38	Shangheshou, Chaoyang	Tuff	40Ar-39Ar	120.1	0.4	He et al., 2004b
139	L3003	41.6072	120.911	Lujiatun, Beipiao	Tuff	40Ar-39Ar	123	1.4	He et al., 2006a
140	L3004	41.6072	120.911	Lujiatun, Beipiao	Tuff	40Ar-39Ar	123.3	1.3	He et al., 2006a
141	JCG-1	41.639	116.355	Jiecaigou, Fengning	Tuff	40Ar-39Ar	129	1.3	He et al., 2006b
142	JCG-5	41.639	116.355	Jiecaigou, Fengning	Tuff	40Ar-39Ar	130.7	0.4	He et al., 2006b
143	CF06-042	41.9379	119.051	Chaoyanggou, Chifeng	Granitic Mylonite	LA-ICP-MS	150	1	Wang et al., 2010a
144	CF06-065-2	41.9696	119.058	Zhalanyingzi, Chifeng	Granitic Mylonite	LA-ICP-MS	254	1	Wang et al., 2010a
145	CF06-066	41.9164	118.982	Molihaigou, Chifeng	Mylonitic Diorite	SHRIMP	128	3	Wang et al., 2010a
146	F04-033	40.0482	119.178	Xiangshan, Qinhuangdao	Alkali-Feldpar Granite	LA-ICP-MS	117	1	Yang et al., 2008a
147	F04-073	40.0537	119.48	Houshihushan, Qinhuangdao	Alkali Amphibole Granite	LA-ICP-MS	118	1	Yang et al., 2008a
148	F04-067	40.0537	119.48	Houshihushan, Qinhuangdao	Syenite	LA-ICP-MS	120	1	Yang et al., 2008a
149	F04-057	40.0537	119.48	Houshihushan, Qinhuangdao	Alkali Rhyolite	LA-ICP-MS	120	1	Yang et al., 2008a
150	F04-062	40.0537	119.48	Houshihushan, Qinhuangdao	Alkali Rhyolite	LA-ICP-MS	119	1	Yang et al., 2008a
151	F04-111	40.3008	117.343	Wulingshan, Xinglong	Porphyritic Syenite	LA-ICP-MS	129	1	Yang et al., 2008a
152	F04-113	40.3008	117.343	Wulingshan, Xinglong	Syenite	LA-ICP-MS	130	1	Yang et al., 2008a
153	F04-114	40.3008	117.343	Wulingshan, Xinglong	Porphyritic Syenite	LA-ICP-MS	130	1	Yang et al., 2008a
154	F04-106	40.3887	117.36	Qiancengbei, Xinglong	Alkali Amphibole Granite	LA-ICP-MS	129	1	Yang et al., 2008a
155	FW02-93	40.5858	120.098	Kuangbang	Quartz Monzodiorite	LA-ICP-MS	182	2	Wu et al., 2006
156	FW02-120	40.7019	120.484	Jianchang	Porphyritic Granodiorite	LA-ICP-MS	185	2	Wu et al., 2006
157	FW02-122	40.7019	120.484	Jianchang	Granite	LA-ICP-MS	190	3	Wu et al., 2006
158	FW02-95	40.5697	120.214	Jianchang	Monzogranite	LA-ICP-MS	153	1	Wu et al., 2006
159	FW02-114	40.6047	120.52	Jianchang	Quartz Monzodiorite	LA-ICP-MS	157	1	Wu et al., 2006
160	FW02-126	40.7989	120.474	Songshunuan	Diorite	LA-ICP-MS	221	2	Wu et al., 2006
161	FW02-135	40.9394	120.68	Yangjiazhangzi	Monzogranite	LA-ICP-MS	188	2	Wu et al., 2006
162	FW02-140	40.9394	120.68	Yangjiazhangzi	Monzogranite	LA-ICP-MS	189	4	Wu et al., 2006
163	FW02-144	40.9333	120.741	Yangjiazhangzi	Porphyritic Monzogranite	LA-ICP-MS	182	2	Wu et al., 2006
164	03JH047	41.9808	121.808	Haitangshan	Granite	LA-ICP-MS	176	1	Wu et al., 2006
165	03JH054	42.0119	121.789	Haitangshan	Granite	LA-ICP-MS	163	1	Wu et al., 2006
166	03JH059	42.0119	121.789	Haitangshan	Granite	LA-ICP-MS	152	1	Wu et al., 2006
167	03JH050	41.9808	121.808	Haitangshan	Mafic Dyke	LA-ICP-MS	125	4	Wu et al., 2006
168	FW02-151	41.6267	121.436	Jianlazi	Two-Mica Granite	LA-ICP-MS	154	2	Wu et al., 2006
169	FW02-156	41.5892	121.473	Jianlazi	Two-Mica Granite	LA-ICP-MS	169	10	Wu et al., 2006
170	FW02-158	41.5892	121.473	Jianlazi	Granite Dyke	LA-ICP-MS	182	3	Wu et al., 2006
171	FW02-168	41.5803	121.701	Yiwulüshan	Two-Mica Granite	LA-ICP-MS	163	3	Wu et al., 2006
172	FW02-170	41.5803	121.701	Yiwulüshan	Granodioritic Enclave	LA-ICP-MS	153	2	Wu et al., 2006
173	FW02-176	41.2539	121.501	Shishan	Monzogranite	LA-ICP-MS	123	3	Wu et al., 2006
174	--	--	--	Dashipo	Monzonite	SHRIMP	196.5	1.9	Deng et al., 2004
175	--	--	--	Siganding	Quarzt Monzonite	SHRIMP	159.3	1.9	Deng et al., 2004
176	--	--	--	Shicheng	Diorite	SHRIMP	155.8	1.5	Deng et al., 2004
177	--	--	--	Changyuan	Diorite	SHRIMP	152.7	3.2	Deng et al., 2004
178	--	--	--	Yunmengshan	Granite	SHRIMP	144.7	2.7	Deng et al., 2004
179	--	--	--	Guijiuyu	Granite	SHRIMP	137.7	3.6	Deng et al., 2004
180	--	--	--	Hanjaichuan	Quarzt Monzonite	SHRIMP	137.6	1.2	Deng et al., 2004
181	--	--	--	Qipanyan	Gabbro	SHRIMP	132.9	0.7	Deng et al., 2004
182	--	--	--	Bijingsi	Shoshonite	SHRIMP	132	1	Deng et al., 2004
183	--	--	--	Xuejiashiliang	Granite	SHRIMP	130	1.7	Deng et al., 2004
184	--	--	--	Shangzhuang	Gabbro	SHRIMP	128.8	1.7	Deng et al., 2004
185	--	--	--	Baicha	Alkaline Feldspar Granite	SHRIMP	127	0.7	Deng et al., 2004
186	--	--	--	Heishanzhai	Monzonite	SHRIMP	125.1	1.5	Deng et al., 2004
187	--	--	--	Humen	Syenite	SHRIMP	124.2	1.8	Deng et al., 2004
188	--	--	--	Heixiongshan	Alkaline Feldspar Granite	SHRIMP	123.7	1.1	Deng et al., 2004
189	No.1	--	--	Hongdunliang pluton, Chicheng	Granite	SHRIMP	144	2	Liu et al., 2010a
190	No.3	--	--	Bingshanling pluton, Chicheng	Granite	SHRIMP	228	3	Liu et al., 2010a
191	No.4	--	--	Donggoulou pluton, Chicheng	Granite	SHRIMP	138	2	Liu et al., 2010a
192	BZHZ-4	40.7842	118.964	Baizhangzi, Lingyuan	Granite	SHRIMP	222	3	Luo et al., 2003
193	DSH-1	40.5096	118.793	Dushan, eastern Hebei	Granite	SHRIMP	223	2	Luo et al., 2004
194	SJ-1	--	--	Sanjia gold mine, eastern Hebei	Granitic Porphyry Dyke	SHRIMP	222	4	Luo et al., 2004
195	QSHK-2	40.2974	118.417	Qingshankou pluton, Jinchangyu	Granite	SHRIMP	199	2	Luo et al., 2001a
196	YEY-3	40.5006	118.566	Yu'erya, eastern Hebei	Granite	SHRIMP	175	1	Luo et al., 2001b
197	YEY-8	40.5006	118.566	Yu'erya, eastern Hebei	Granite	SHRIMP	174	3	Luo et al., 2001b
198	NXSH-2	40.4355	118.935	Niuxinshan, eastern Hebei	Granite	SHRIMP	172	2	Luo et al., 2001b
199	PSHL-1	41.8811	121.773	Paishanlou gold mine, Fuxin	Dioritic Porphyry	SHRIMP	126	2	Luo et al., 2001c
200	PSHL-2	41.8776	121.772	Paishanlou gold mine, Fuxin	Granitic Porphyry	SHRIMP	124	1	Luo et al., 2001c
201	PSHL-10	41.8799	121.775	Paishanlou gold mine, Fuxin	Dioritic Porphyry	SHRIMP	125	1	Luo et al., 2001c
202	PSHL-4	41.8868	121.793	Paishanlou gold mine, Fuxin	Biotite Granite	SHRIMP	124	1	Luo et al., 2001c
203	T-1	--	--	Tangzhangzi, eastern Hebei	Granitic Porphyry	SHRIMP	173	2	Guo et al., 2009a
204	HH-1	--	--	Niuxinshan, eastern Hebei	Granite	SHRIMP	173	2	Guo et al., 2009a
205	GZZ-1	40.8342	115.207	Guzuizi, Zhangjiakou	Granite	SHRIMP	236	2	Miao et al., 2002
206	FW04-123	40.5464	114.934	Xuanhua, Zhangjiakou	Dacite	LA-ICP-MS	130	1	Yang et al., 2006a
207	FW04-124	40.8744	114.916	Zhangjiakou	Rhyolite	LA-ICP-MS	126	1	Yang et al., 2006a
208	D1081	40.1075	117.267	Panshan, Jixian	Monzogranite	SHRIMP	205	2	Ma et al., 2007
209	D1066	40.0875	117.29	Panshan, Jixian	Quartz Monzonite	SHRIMP	208	4	Ma et al., 2007
210	D1030-1	40.0967	117.241	Panshan, Jixian	Monzogranite	SHRIMP	203	5	Ma et al., 2007
211	D1087	41.09	117.191	Panshan, Jixian	Quartz Monzonite Dyke	SHRIMP	206	2	Ma et al., 2007
212	SBZ09-1	40.2428	118.737	Sobozi-Liubozi, Qinglong	Monzogranite	LA-ICP-MS	206	1	Li et al., 2012a
213	SBZ09-10	40.2389	118.712	Sobozi-Liubozi, Qinglong	Monzogranite	LA-ICP-MS	211	1	Li et al., 2012a
214	SBZ09-17	40.2717	118.724	Sobozi-Liubozi, Qinglong	Granitic Porphyry	LA-ICP-MS	190	1	Li et al., 2012a
215	SBZ09-33	40.2872	118.718	Sobozi-Liubozi, Qinglong	Monzogranite	LA-ICP-MS	160	1	Li et al., 2012a
216	SBZ09-51	40.2633	118.692	Sobozi-Liubozi, Qinglong	Monzogranite	LA-ICP-MS	177	1	Li et al., 2012a
217	SBZ09-56	40.2642	118.709	Sobozi-Liubozi, Qinglong	Granitic Porphyry	LA-ICP-MS	196	1	Li et al., 2012a
218	By98055	41.6844	117.233	Beichagoumen, Fengning	Biotite Quartz Monzonite	TIMS	146.2	1.4	Mao et al., 2003
219	Zk201G	41.6844	117.233	Beichagoumen, Fengning	Granodioritic Porphyry	TIMS	146.2	3.9	Mao et al., 2003
220	By99077	41.6844	117.233	Beichagoumen, Fengning	Quartz Monzonite	TIMS	147.6	1.6	Mao et al., 2003
221	By993187	41.6844	117.233	Beichagoumen, Fengning	K-Feldspar Granite	TIMS	138.5	1.3	Mao et al., 2003
222	By98076	41.6844	117.233	Beichagoumen, Fengning	Quartz Monzonite	TIMS	138.5	1.2	Mao et al., 2003
223	By98228	41.6333	117.167	Hanjiadian pluton, Fengning	Hornblende Quartz Monzonite	TIMS	250	3.6	Mao et al., 2003
224	By99087	41.6667	117.1	Hanjiadian pluton, Fengning	K-Feldspar Granite	TIMS	247.1	1.9	Mao et al., 2003
225	By98046	41.6833	117.133	Hanjiadian pluton, Fengning	Biotite Monzogranite	TIMS	246.7	2.5	Mao et al., 2003
226	Nangoushang-1	40.9286	119.245	Shuiquangou Formation, Lingyuan	Pyroxene Andesite	SHRIMP	230	3	Hu et al., 2005a
227	N301	--	--	Honghualiang, Zhangjiajkou	Granite	SHRIMP	235	2	Jiang et al., 2007
228	XZJ	--	--	Xiaozhangjiakou, Chicheng	Ultramafic Rocks	SHRIMP	220	5	Tian et al., 2007
229	NGS	--	--	Dengzhangzi Formation, Lingyuan	Andesitic Volcanic Cobble	SHRIMP	211	6	Hu et al., 2007a
230	--	--	--	NW Changge, Fengning	Monzogranite	SHRIMP	248	10	Wang et al., 2007
231	CD10	40.8008	118.089	Chengde	Lava-Tuff	LA-ICP-MS	147	2	Zhang et al., 2009a
232	CY05	41.6044	120.806	Sihetun, Beipiao	Tuff	LA-ICP-MS	137	7	Zhang et al., 2009a
233	BP01	41.5489	120.832	Batuyingzi	Tuff	LA-ICP-MS	142	1	Zhang et al., 2009a
234	BT04	41.4968	120.803	Batuyingzi	Andesite	LA-ICP-MS	147	2	Zhang et al., 2009a
235	Zh01	--	--	Zhangjiakou Formation, Zhangjiakou	Dacite	LA-ICP-MS	143	4	Zhang et al., 2008a
236	Zh02	--	--	Zhangjiakou Formation, Zhangjiakou	Dacite	LA-ICP-MS	139	3	Zhang et al., 2008a
237	Zh03	--	--	Zhangjiakou Formation, Zhangjiakou	Dacite	LA-ICP-MS	140	3	Zhang et al., 2008a
238	Zh04	--	--	Zhangjiakou Formation, Zhangjiakou	Dacite	LA-ICP-MS	136	1	Zhang et al., 2008a
239	4129-03-01	41.0211	119.144	Zhuanghugou, Lingyuan	Acid Tuff	LA-ICP-MS	130	1	Zhang et al., 2005a
240	4129-04-01	41.0205	119.153	Xuejiagou, Lingyuan	Acid Tuff	LA-ICP-MS	129	1	Zhang et al., 2005a
241	4129-05-01	41.0233	119.196	Maozishan, Lingyuan	Dacite	LA-ICP-MS	129	2	Zhang et al., 2005a
242	41017-4	41.0474	119.211	East Maozishan, Lingyuan	Rhyolite	LA-ICP-MS	132	2	Zhang et al., 2005a
243	41016	40.7631	117.396	Haoying, Luanping	Rhyolitic Tuff	LA-ICP-MS	135	2	Zhang et al., 2005a
244	41015	40.819	117.217	Zhangjiagoumen, Luanping	Tuffaceous Rhyolite	LA-ICP-MS	136	2	Zhang et al., 2005a
245	YX-285	40.87	117.282	Western Luanping	Basaltic Andesite	LA-ICP-MS	131	4	Zhang et al., 2005b
246	YX-282	40.9141	117.366	Liying, Luanping	Basaltic Andesite	LA-ICP-MS	130	3	Zhang et al., 2005b
247	328-4	40.8035	117.209	Zhangjiagoumen, Luanping	Rhyolite	LA-ICP-MS	136	2	Zhang et al., 2005b
248	328-3	40.8092	117.212	Zhangjiagoumen, Luanping	Welded Tuff	LA-ICP-MS	140	2	Zhang et al., 2005b
249	328-2	40.9329	117.469	Xiaoying, Luanping	Acid Tuff-Lava	LA-ICP-MS	143	1	Zhang et al., 2005b
250	328-1	40.9211	117.47	Xiaoying, Luanping	Andesite	LA-ICP-MS	163	3	Zhang et al., 2005b
251	YX-214	--	--	Maozishan, Lingyuan	Dacite	LA-ICP-MS	132	1	Zhang et al., 2005c
252	10-17-1	--	--	Maozishan, Lingyuan	Dacitic Volcanic Breccia Lava	LA-ICP-MS	130	2	Zhang et al., 2005c
253	HFG-2	41.1744	117.267	Guanglingshan, Fengning	Monzogranite	SHRIMP	254	3	Zhang et al., 2009b
254	D315-1	41.8825	119.63	Jianping	Syenogranite	LA-ICP-MS	241	2	Zhang et al., 2009b
255	D315-3	41.8825	119.63	Jianping	Monzogranite	LA-ICP-MS	237	1	Zhang et al., 2009b
256	Hq01	41.1611	115.246	Hailiutu, Chicheng	Monzogranite	LA-ICP-MS	250	11	Wang et al., 2009
257	Hq06	41.0711	115.197	Baihuagou, Chicheng	Quartz Diorite	LA-ICP-MS	252	3	Wang et al., 2009
258	Fk04-5	42.4961	123.492	Faku, western Liaoning	Gabbro	SHRIMP	241	6	Zhang et al., 2009c
259	Wys457	--	--	Guozhangzi, Kuancheng	Granitic Porphyry	LA-ICP-MS	228	2	Zhao, 2010b
260	Wys454	--	--	Kuangcheng	Granitic Porphyry	LA-ICP-MS	227	1	Zhao, 2010b
261	--	--	--	Wangtufang, Pingquan	Granite	LA-ICP-MS	207	1	Liu et al., 2012b
262	--	--	--	Wangtufang, Pingquan	Granite	LA-ICP-MS	190	1	Liu et al., 2012b
263	--	--	--	Lanjiagou, western Liaoning	Granite	SHRIMP	189	1	Dai et al., 2008
264	XL4	--	--	Xinglonggou, Beipiao	Andesite	40Ar-39Ar	201.5	3.8	Shao and Yang, 2011b
265	YX270	--	--	Zhangwu, western Liaoning	High-Mg Adakite	LA-ICP-MS	126	1	Huang et al., 2007
266	XLG-4	41.7756	120.643	Xinglonggou, Beipiao	Tuff	LA-ICP-MS	177	4	Yang and Li, 2008
267	DHG-1	41.3204	119.228	Daohugou, Ningcheng	Tuff	LA-ICP-MS	165	1	Yang and Li, 2008
268	DHG-2	41.3204	119.228	Daohugou, Ningcheng	Andesite	LA-ICP-MS	164	2	Yang and Li, 2008
269	HFG-27	41.8414	120.767	Beipiao	Andesite	LA-ICP-MS	160	6	Yang and Li, 2008
270	HFG-29	41.8414	120.767	Beipiao	Andesitic Porphyrite	LA-ICP-MS	153	2	Yang and Li, 2008
271	HFG-13			Haifanggou, Beipiao	Basalt	40Ar-39Ar	166.1	0.9	Yang and Li, 2008
272	WHC-2	42.3083	121.894	Wuhuanchi	Basalt	40Ar-39Ar	106.1	0.8	Yang and Li, 2008
273	--	--	--	Yemaotai, Zhangwu	Volcanic Rock	40Ar-39Ar	124.8	6.9	Chen et al., 1997
274	--	--	--	Dingjiafang, Zhangwu	Volcanic Rock	40Ar-39Ar	125.9	2	Chen et al., 1997
275	--	--	--	Huideyingzi, Zhangwu	Volcanic Rock	40Ar-39Ar	123.7	4.4	Chen et al., 1997
276	--	--	--	Maoniuhai, Zhangwu	Volcanic Rock	40Ar-39Ar	125.5	0.7	Chen et al., 1997
277	--	--	--	Haifanggou, Beipiao	Volcanic Rock	40Ar-39Ar	140	2	Chen et al., 1997
278	--	--	--	Daheishan, Beipiao	Volcanic Rock	40Ar-39Ar	188.2	7.4	Chen et al., 1997
279	--	--	--	Lanqidonggou, Beipiao	Volcanic Rock	40Ar-39Ar	141.6	3.5	Chen et al., 1997
280	--	--	--	Hejiagou, Yixian	Volcanic Rock	40Ar-39Ar	119	10	Chen et al., 1997
281	--	--	--	Zhujiagou, Yixian	Volcanic Rock	40Ar-39Ar	124.5	4.9	Chen et al., 1997
282	--	--	--	Sanbailong, Yixian	Volcanic Rock	40Ar-39Ar	125.5	0.1	Chen et al., 1997
283	--	--	--	Zhuanchengzi, Yixan	Volcanic Rock	40Ar-39Ar	129	0.3	Chen et al., 1997
284	--	--	--	Shangdijiagou, Yixian	Volcanic Rock	40Ar-39Ar	133	5	Chen et al., 1997
285	--	--	--	Da'ertaizi, Songling, Chaoyang	Volcanic Rock	40Ar-39Ar	166.5	0.8	Chen et al., 1997
286	20-KL-37	--	--	Anjiayingzi, Chifeng	Granite	TIMS	135	5	Li et al., 2004
287	20-KL-58	--	--	Anjiayingzi, Chifeng	Monzogranite	TIMS	132	5	Li et al., 2004
288	Dy09-9	41.4126	118.484	Ningcheng	Quartz Diorite	LA-ICP-MS	226	2	Zhang et al., 2014
289	Dy09-3	41.4126	118.484	Ningcheng	Gabbroic Diorite	LA-ICP-MS	220	7	Zhang et al., 2014
290	Dy09-5	41.4126	118.484	Ningcheng	Gabbroic Diorite	LA-ICP-MS	228	2	Zhang et al., 2014
291	Dy09-8	41.4126	118.484	Ningcheng	Pyroxenite	LA-ICP-MS(Bdy)	225	2	Zhang et al., 2014
292	Dy09-14	41.4126	118.484	Ningcheng	Pyroxenite	LA-ICP-MS	226	2	Zhang et al., 2014
293	Dy09-1	41.4126	118.484	Ningcheng	Gabbro	LA-ICP-MS	219	1	Zhang et al., 2014
294	DY09-12	--	--	Jiwangyingzi	Gabbroic Diorite	LA-ICP-MS	253	4	Zhang et al., 2014
295	1	41.4469	118.514			LA-ICP-MS	210	2	Lin et al., 2013, Chinese Science Bulletin
296	2	41.555	118.638			LA-ICP-MS	245	2	Lin et al., 2015, Chinese Journal of Geology
297	3	41.8028	118.909			LA-ICP-MS	235	2	Lin et al., 2013, Chinese Science Bulletin
298	4	41.8908	118.997			LA-ICP-MS	150	2	Lin et al., 2013, Chinese Science Bulletin
299	5	41.97	119.06			LA-ICP-MS	251	2	Lin et al., 2013, Chinese Science Bulletin
300	6	41.9339	118.988			LA-ICP-MS	271	2	Lin et al., 2013, Chinese Science Bulletin
301	7	42.0136	119.099			LA-ICP-MS	271	2	Lin et al., 2013, Chinese Science Bulletin
302	8	41.4261	118.508			LA-ICP-MS	251	3	Lin et al., 2013, Chinese Science Bulletin
303	9	41.915	118.985			LA-ICP-MS	131	1	Lin et al., 2013, Chinese Science Bulletin
304	10	41.9675	119.039			LA-ICP-MS	251	2	Lin et al., 2013, Chinese Science Bulletin
305	11	41.9675	119.039			LA-ICP-MS	120	1	Lin et al., 2015, Chinese Journal of Geology
306	12	41.7544	118.389			LA-ICP-MS	153	2	Lin et al., 2013, Chinese Science Bulletin
307	13	42.0678	118.775			LA-ICP-MS	121	1	Lin et al., 2013, Chinese Science Bulletin
308	14	41.6692	118.911			LA-ICP-MS	121	2	Lin et al., 2013, Chinese Science Bulletin
309	15	41.7483	118.334			LA-ICP-MS	153	1	Lin et al., 2013, Chinese Science Bulletin
310	16	41.4272	118.514			LA-ICP-MS	251	2	Lin et al., 2013, Chinese Science Bulletin
311	17	41.4272	118.514			LA-ICP-MS	250	9	Lin et al., 2013, Chinese Science Bulletin
312	18	41.5175	118.699			LA-ICP-MS	271	2	Lin et al., 2013, Chinese Science Bulletin
313	19	41.5175	118.699			LA-ICP-MS	251	3	Lin et al., 2013, Chinese Science Bulletin
314	20	41.5175	118.699			LA-ICP-MS	266	2	Lin et al., 2015, Chinese Journal of Geology
315	21	41.8114	118.959			LA-ICP-MS	165	1	Lin et al., 2013, Chinese Science Bulletin
316	22	41.8761	119.016			LA-ICP-MS	236	4	Lin et al., 2013, Chinese Science Bulletin
317	23	41.9483	119.034			LA-ICP-MS	250	2	Lin et al., 2013, Chinese Science Bulletin
318	24	41.9675	119.039			LA-ICP-MS	250	2	Lin et al., 2013, Chinese Science Bulletin
319	25	41.6375	118.309			LA-ICP-MS	312	2	Lin et al., 2013, Chinese Science Bulletin
320	26	41.6375	118.309			LA-ICP-MS	225	1	Lin et al., 2013, Chinese Science Bulletin
321	27	41.5565	112.892			LA-ICP-MS	415	3.2	Gong et al., 2019, Geological Review
322	28	41.5565	112.892			LA-ICP-MS	414	2.7	Gong et al., 2019, Geological Review
323	29	41.5565	112.892			LA-ICP-MS	413	1.8	Gong et al., 2019, Geological Review
324	30	41.1909	114.106			LA-ICP-MS	372.3	3.1	Gong et al., 2019, Geological Review
325	31	41.1909	114.106			LA-ICP-MS	365.9	2.7	Gong et al., 2019, Geological Review
326	32	40.5756	115.224			LA-ICP-MS	157.8	1.2	Hao et al., 2020, GSA Bulletin
327	33	40.4855	115.256			LA-ICP-MS	162.8	1.2	Hao et al., 2020, GSA Bulletin
328	34	40.7424	117.378			LA-ICP-MS	156.4	1.9	Hao et al., 2020, GSA Bulletin
329	35	40.7527	117.368			LA-ICP-MS	157.5	3.3	Hao et al., 2020, GSA Bulletin
330	36	41.8658	120.808			LA-ICP-MS	160.1	2.5	Hao et al., 2020, GSA Bulletin
331	37	41.7726	120.633			LA-ICP-MS	164.3	2.5	Hao et al., 2020, GSA Bulletin
332	38	40.5751	115.225			LA-ICP-MS	159.6	1.8	Hao et al., 2020, GSA Bulletin
333	39	41.8374	120.753			LA-ICP-MS	163.6	2.9	Hao et al., 2020, GSA Bulletin
334	40	41.8675	120.809			LA-ICP-MS	167.9	2.4	Hao et al., 2020, GSA Bulletin
335	41	41.8122	120.79			LA-ICP-MS	226.2	3.5	Hao et al., 2020, GSA Bulletin
336	42					LA-ICP-MS	170	1	Gao et al., 2018, A Dissertation Submitted to China University of Geosciences
337	43					LA-ICP-MS	169	3	Gao et al., 2018, A Dissertation Submitted to China University of Geosciences
338	44					LA-ICP-MS	168	2	Gao et al., 2018, A Dissertation Submitted to China University of Geosciences
339	45					LA-ICP-MS	175	1	Gao et al., 2018, A Dissertation Submitted to China University of Geosciences
340	46					LA-ICP-MS	177	1	Gao et al., 2018, A Dissertation Submitted to China University of Geosciences
341	47					LA-ICP-MS	172	2	Gao et al., 2018, A Dissertation Submitted to China University of Geosciences
342	48					LA-ICP-MS	164	3	Gao et al., 2018, A Dissertation Submitted to China University of Geosciences
343	49					LA-ICP-MS	164	2	Gao et al., 2018, A Dissertation Submitted to China University of Geosciences
344	50					LA-ICP-MS	165	2	Gao et al., 2018, A Dissertation Submitted to China University of Geosciences
345	51					LA-ICP-MS	169	1	Gao et al., 2018, A Dissertation Submitted to China University of Geosciences
346	YHC13	40.0659	115.715	Yanhecheng	Aubergine Rhyolite		133.8	4.7	Yuan et al., 2006, Science in China: Series D Earth Sciences
347	DT37	39.9785	115.914	Datai	Dacite		137.1	4.5	Yuan et al., 2006, Science in China: Series D Earth Sciences
348	DT37	39.9785	115.914	Datai	Dacite		130.1	4.6	Yuan et al., 2006, Science in China: Series D Earth Sciences
349	BJ10-01	39.9792	115.943	Tombs area-Western hills	Diorite	SHRIMP	149	3	Yu et al., 2016
350	BJ12-03	40.2483	116.26	Tiaojishan Fm.	Volcanic Breccia	LA-ICPMS	155	2	Yu et al., 2016
351	BJ12-08	40.2464	116.264	Tiaojishan Fm.	Andesite	LA-ICPMS	153	2	Yu et al., 2016
352	BJ10-02	39.98	115.942	Tiaojishan Fm.	Volcanic Breccia	SHRIMP	152	2	Yu et al., 2016
353	BJ10-03	39.9814	115.941	Tiaojishan Fm.	Andesite	SHRIMP	149	2	Yu et al., 2016
354	BJ12-01	40.2508	116.253	Tiaojishan Fm.	Tuff	LA-ICPMS	157	1	Yu et al., 2016
355	D0420-4-2	40.6258	116.727	Yunmengshan	Bi-Granite		143	3	Shi et al., 2009, Acta Geologica Sinica (English edition)
356	D0421-24	40.5905	116.73	Yunmengshan	Granite		145	2	Shi et al., 2009, Acta Geologica Sinica (English edition)
357	D0421-25	40.593	116.73	Yunmengshan	Granite		144	2	Shi et al., 2009, Acta Geologica Sinica (English edition)
358	D0422-2	40.6264	116.774	Shicheng, Yunmengshan	Diorite		157	4	Shi et al., 2009, Acta Geologica Sinica (English edition)
359	D0422-4	40.6139	116.775	Shicheng, Yunmengshan	Diorite		159	5	Shi et al., 2009, Acta Geologica Sinica (English edition)
360	D0501-4-1	40.5475	116.803	Shicheng, Yunmengshan	Diorite		155	4	Shi et al., 2009, Acta Geologica Sinica (English edition)
361	D0502-1	40.6352	116.741	Shicheng, Yunmengshan	Monzodiorite		151	5	Shi et al., 2009, Acta Geologica Sinica (English edition)
362	D0420-4-1	40.6258	116.727	Yunmengshan	Granite		141	1	Shi et al., 2009, Acta Geologica Sinica (English edition)
363	WY-2	40.3	116.367	Xuejiashiliang	Gabbro		128.8	1.7	Su et al., 2007, Lithos
364	WY-3	40.3	116.367	Xuejiashiliang	Monzogabbro		130	1.7	Su et al., 2007, Lithos
365	WY-16	40.3	116.367	Xuejiashiliang	Monzonite		125.1	1.5	Su et al., 2007, Lithos
366	WY-4	40.3	116.367	Xuejiashiliang	Syenite		124.2	1.8	Su et al., 2007, Lithos
367	WY-14	40.3	116.367	Xuejiashiliang	Granite		123.7	1.1	Su et al., 2007, Lithos
368	07FS09	39.7333	115.95	Fangshan	Quartz Monzodiorite		130	1	Sun et al., 2010, Lithos
369	07FS02	39.7333	115.95	Fangshan	Medium-Grained Granodiorite		133	1	Sun et al., 2010, Lithos
370	08FS02	39.7333	115.95	Fangshan	Quartz Monzodiorite		134	1	Sun et al., 2010, Lithos
371	08FS10	39.7333	115.95	Fangshan	Medium-Grained Granodiorite		132	1	Sun et al., 2010, Lithos
372	07FS11	39.7333	115.95	Fangshan	Porphyritic Granodiorite		130	1	Sun et al., 2010, Lithos
373	08005-4	40.5563	117.749	Shouwangfen, Xinglong	Andesite		161	2	Zhang SH et al. (2014)
374	D078-2	41.025	117.077	Lingying, Fengning	Dacite		156	4	Zhang SH et al. (2014)
375	HB13-08	40.7167	115.733	Shuinianpu, Diaoe	Andesite		157.4	1	Qi et al. (2015)
376	HB12-70	40.7167	115.9	Dongxingpu, Diaoe	Rhyolite		149.2	1.9	Qi et al. (2015)
377	HB13-02	40.6833	116.092	Houcheng, Houcheng	Trachy-Andesite		165.7	1.2	Qi et al. (2015)
378	HB13-01	40.6833	116.117	Jijiayao, Houcheng	Rhyolite		155.1	0.8	Qi et al. (2015)
379	HB13-10	40.8333	115.817	Haomenling, Diaoe	Rhyolitic Volcaniclastic Rocks		146.9	1.2	Qi et al. (2015)
380	JN0713	40.6167	115.675	Zhangjiakou	Trachyandesite		125	3	Jiang et al. (2011)
381	JN0723	40.7833	115.492	Zhangjiakou	Rhyolite		137	1	Jiang et al. (2011)
382	JN0716	40.75	115.783	Zhangjiakou	Rhyolite		141	1	Jiang et al. (2011)
383	HD384B1	40.7234	116.068	Houcheng	Rhyolitic Tuff		143	1	Lin et al. (2020)
384	TH12252B1	40.9373	116.784	Changshaoying-Dalanying	Rhyolite		135	1	Lin et al. (2020)
385	TH12184B1	40.9196	116.865	Changshaoying-Dalanying	Andesite		129	1	Lin et al. (2020)
386	HB13-07	40.725	115.783	Kangzhuang, Diaoe	Rhyolitic Volcaniclastic Rocks		143.4	0.5	Qi et al. (2015)
387	HB12-63	40.85	115.892	Yangjiafen, Diaoe	Rhyolite		136.3	0.8	Qi et al. (2015)
388	HB12-65	40.8333	115.95	Yangtian, Diaoe	Dacite		136.4	1	Qi et al. (2015)
389	HD335B1	40.8173	116.189	Xiagangfang, Changshaoying-Dalanying	Quartz Monzonite		132	1	Lin et al. (2020)
390	1021	40.9333	118.4	Qianzhangzi, Pingquan	Syenite		164	4	Zhang SH et al. (2014)
391	HPQ020817	40.9333	118.4	Qianzhangzi, Pingquan	Diorite		166	2	Zhang SH et al. (2014)
392	08008-1	40.7441	118.146	Chengde county	Dioritic Porphyrite		159	2	Zhang SH et al. (2014)
393	09018-1	40.4345	118.518	Nianziyu, Kuancheng	Diorite		165	2	Zhang SH et al. (2014)
394	N302	40.9083	115.383	Zhuanzhilian, Zhangjiakou	Diorite		139.5	0.9	Jiang et al. (2007)
395	JN0743	40.8542	115.408	Shangshuiquan, Zhangjiakou	Granite		142.9	0.8	Jiang et al. (2009)
396	JN0622	40.5	115.737	Zhangjiakou	Granite		129	1	Jiang et al. (2011)
397	DZZ-3	40.1333	116.317	Dengzhazi	Granite		140	2	Niu et al. (2011)
398	18BZ21	40.6039	117.841	Shouwangfen, Xinglong	Quartz Monzonite		129	1	Dong et al. (2020)
399	18PJ25	40.6	117.898	Shouwangfen, Xinglong	Quartz Monzodiorite		129	1	Dong et al. (2020)
400	18XB09	40.6717	117.855	Shouwangfen, Xinglong	Mme		128	1	Dong et al. (2020)
401	18CL29	40.6086	117.791	Shouwangfen, Xinglong	Mme		130	1	Dong et al. (2020)
402	WJB-TW1	40.2265	123.417	Wangjiabao, Liaodong	Quartz Diorite	LA-ICP-MS	127.1	2.8	Dong et al., 2021
403	LJB-TW1	40.2514	123.382	Lijiabao, Liaodong	Graodiorite	LA-ICP-MS	125.9	1.3	Dong et al., 2021
404	HDB-TW1	40.4406	123.2	Hadabei, Liaodong	Granodiorite	LA-ICP-MS	129.1	2.1	Dong et al., 2021
405	10018-1	40.598	117.893	Shouwangfen, Xinglong	Quartz Diorite		133	1	Zhang SH et al. (2014)
406	10096-1	41.0178	116.633	Yunwushan, Fengning	Granodiorite		138	1	Zhang SH et al. (2014)
407	08005-1	40.5575	117.749	Shouwangfen, Xinglong	Andesite Porphyrite		128	1	Zhang SH et al. (2014)
408	CY03	41.8246	120.678	Beipiao	Dacite		154	4.7	Zhang et al. (2008)
409	BT04	41.4968	120.803	Tashangou, Chaoyang	Andesite		161.8	2.1	Zhang et al. (2008)
410	402-4	41.005	119.082	Sanshijiazi	Dacite		156.9	3	Zhang et al. (2008)
411	HFG09-2	41.8417	120.78	Beipiao	Tuff		166.7	1.1	Chang et al. (2014)
412	LQ09-2	41.8505	120.771	Beipiao	Andesite		159.5	0.6	Chang et al. (2014)
413	JC11-1a	40.8676	119.982	Linglongta, Jianchang	Tuff		160.7	1.7	Wang et al. (2013)
414	JC11-6	40.8652	119.998	Linglongta, Jianchang	Tuff		159.5	2.3	Wang et al. (2013)
415	JC11-4	40.8653	119.975	Linglongta, Jianchang	Tuff		158.9	1.7	Wang et al. (2013)
416	09CLH-10	41.2833	120.767	Shenjiatai, Chaoyang	Trachyte		173.4	3.1	Ma et al. (2015)
417	JC11-4	40.8653	119.975	Linglongta, Jianchang	Tuff		160.889	0.069	Chu et al. (2016)
418	JC11-7	40.8655	119.998	Linglongta, Jianchang	Tuff		160.383	0.062	Chu et al. (2016)
419	JC11-11	40.8676	119.982	Linglongta, Jianchang	Tuff		160.254	0.045	Chu et al. (2016)
420	P4T-1	41.6025	120.781	Shihetun	Tuff		124.6	0.2	Swisher et al. (1999)
421	P1T-2	41.6025	120.781	Shihetun	Tuff		124.6	0.3	Swisher et al. (1999)
422	99L-S1	41.6025	120.781	Sihetun	Volcanic Ash		125	0.18	Swisher et al. (2001)
423	99L-HDZ1	41.6025	120.781	Hengdaozi	Tuff		125	0.19	Swisher et al. (2001)
424	YX-277	41.0244	119.196	Maozishan, Lingyuan	Tuff		125.4	0.9	Zhang et al. (2006)
425	YX-278	41.0423	119.209	Maozishan, Lingyuan	Rhyolite		125.3	0.9	Zhang et al. (2006)
426	YX-279	41.0417	119.206	Maozishan, Lingyuan	Rhyolite		124.4	1.1	Zhang et al. (2006)
427	41017-2	41.0531	119.198	Guojiagou, Lingyuan	Tuff		122.3	2.1	Zhang et al. (2006)
428	YX-281	41.1518	119.282	Dawangzhangzi	Rhyolite		123	1.7	Zhang et al. (2006)
429	LX-SHT-12	41.6025	120.781	Shihetun	Tuff		124.7	2.7	Yang W et al. (2007)
430	LX-HBJ-1	41.6025	120.781	Huangbanjie	Tuff		124.9	1.7	Yang W et al. (2007)
431	LX-HBJ-6	41.6025	120.781	Huangbanjie	Tuff		122.8	1.6	Yang W et al. (2007)
432	ZW21	42.5333	122.9	Dasijiazi, Zhangwu	Rhyolite		122.4	0.4	Xiao et al. (2008)
433	YX-210	41.025	119.192	Maozishan, Lingyuan	Rhyolite		124.4	1.4	Meng et al. (2008)
434	SHT16	41.6025	120.781	Sihetun	Basalt		123	1.6	Gao et al. (2008)
435	SHT31	41.6025	120.781	Sihetun	Basalt		124.8	1.5	Gao et al. (2008)
436	NJG2-01	40.6167	119.575	Jianchang	Basaltic Trachyandesite		120.7	0.8	Feng et al. (2015)
437	LLX020811	40.9917	119.3	Xingzhangzi, Lingyuan	Quartz Porphyry		165	2	Zhang SH et al. (2014)
438	XJY	41.5333	119.85	Xiaojiayingzi	Diorite		169.9	1.4	Dai et al. (2009)
439	LB64	41.6833	121.667	Lvshan, Yiwulvshan	Coarse-Grained Monzogranite		161	5	Zhang X et al. (2014)
440	FX12-24-6	42.1167	122	Haitangshan, Yiwulvshan	Diorite		172	1	Zhang X et al. (2014)
441	HS09-3	41.9333	121.833	Haitangshan, Yiwulvshan	Gabbro		164	4	Zhang X et al. (2014)
442	HT09-3	41.9333	121.833	Haitangshan, Yiwulvshan	Granodiorite		162	1	Zhang X et al. (2014)
443	HS09-2	41.9333	121.833	Haitangshan, Yiwulvshan	Monzogranite		168	2	Zhang X et al. (2014)
444	HS09-17	41.9333	121.833	Haitangshan, Yiwulvshan	Granite		164	2	Zhang X et al. (2014)
445	FX04-4	41.9333	121.833	Haitangshan, Yiwulvshan	Monzogranite		158	2	Zhang X et al. (2014)
446	09061-1	42.0207	120.48	Daheishan, NW Beipiao	Quartz Monzonite		164	1	Zhang SH et al. (2014)
447	CXC50-1	40.375	120.417	Xingcheng	Bi Adamellite		159	1	Liang et al. (2015)
448	09043-1	41.2121	119.652	Liuguanyingzi, Lingyuan	Dioritic Porphyrite		124	2	Zhang SH et al. (2014)
449	040531-4	41.3835	119.159	Daohugou, Ningcheng	Trachyandesite		152	3	Liu Y et al. (2006)
450	040601-7	41.385	119.16	Daohugou, Ningcheng	Quartz Trachyandesite		162	2	Liu Y et al. (2006)
451	040530-16	41.3615	119.391	Daohugou, Ningcheng	Rhyolite		164	3	Liu Y et al. (2006)
452	040530-11	41.4072	119.453	Daohugou, Ningcheng	Quartz Trachyandesite		157	3	Liu Y et al. (2006)
453	DHG-1	41.4	119.45	Daohugou	Tuff		165	1.2	Yang & Li (2008)
454	DHG-2	41.4	119.45	Daohugou	Andesite		164.3	2.2	Yang & Li (2008)
455	DHG-57	41.4167	119.267	Daohugou, Ningcheng	Rhyolite		164	1	Meng et al. (2018)
456	08170-2	42.3011	120.273	Peijiadian	Rhyolitic Tuff		162	2	Zhang SH et al. (2014)
457	09064-1	42.302	120.277	Nantaxiang	Rhyolite		164	3	Zhang SH et al. (2014)
458	07D006-1	42.0904	119.057	Zhoujiawopu	Quartz Trachyandesite		169	1	Zhang SH et al. (2014)
459	07D010-1	42.099	119.126	Zhoujiawopu	Quartz Monzodiorite		159	2	Zhang SH et al. (2014)
460	BGH4	41.9583	120.308	Diumiangou,Chifeng	Quartz Monzonite		128	1	Fu et al. (2012)
461	07D044-1	42.5607	118.464	Gangzi, NW Chifeng	Quartz Syenite Porphyry		138	2	Zhang SH et al. (2014)
462	JY1	41.9	118.867	Kalaqin	Adamellite		133	1	Fu et al. (2016)
	Yinshan Mts.
463	07233-1	40.8067	109.619	Shadegai, Baotou	Alkaline Granite	LA-ICP-MS	235	3	Zhang et al., 2014--ESR
464	10205-1	41.432	109.976	Hejiao, South Bayan Obo	Rhyolite	LA-ICP-MS	128	1	Zhang et al., 2014--ESR
465	10207-1	41.5167	109.906	Hejiao, South Bayan Obo	Rhyolitic Tuff	LA-ICP-MS	131	2	Zhang et al., 2014--ESR
466	YY03-2	39.9186	112.431	Dishuiyan	Monzonite	SIMS	241	3	Ying et al., 2011
467	BY88			Fanshan	Pyroxene Syenite	SHRIMP	218	2	Ren et al., 2009a
468	07235-1	40.5708	110.225	Yongfucun	Syenite	SHRIMP	233	7	Zhang et al., 2012a
469	07236-1	40.5697	110.236	Yongfucun	Syenite	LA-ICP-MS	224	2	Zhang et al., 2012a
470	07245-1	40.3069	114.559	Yaojiazhuang	Pyroxene Syenite	LA-ICP-MS	224	5	Zhang et al., 2012a
471	07245-3	40.3069	114.559	Yaojiazhuang	Pyroxene Syenite	SHRIMP	221	5	Zhang et al., 2012a
472	07245-3	40.3069	114.559	Yaojiazhuang	Pyroxene Syenite	SIMS(Bdy)	234	4	Zhang et al., 2012a
473	SDG1	40.8039	109.608	Western Shadegai	Granite	SHRIMP	222	2	Hou et al., 2011
474	WC08-06			Hutoushan, Hohhot	Granite	SIMS	131	1	He, 2010
475	DQ08-110	41.0615	112.023	Shenshuiliang, Hohhot	Granodiorite	LA-ICP-MS	148	1	Guo et al., 2012
476	DQ08-100	41.0237	112.064	Shenshuiliang, Hohhot	Monzogranite	LA-ICP-MS	140	1	Guo et al., 2012
477	Hu09-55	41.0082	112.115	Shenshuiliang, Hohhot	Monzogranite	LA-ICP-MS	138	1	Guo et al., 2012
478	DQ08-65-1	40.9623	111.897	Daqingshan, Hohhot	Monzogranite	SHRIMP	142	1	Guo et al., 2012
479	DQ08-38	40.0038	111.841	Kuisu, Hohhot	Granodiorite	LA-ICP-MS	142	1	Guo et al., 2012
480	DQ08-70	40.9917	111.885	Kuisu, Hohhot	Monzogranite	LA-ICP-MS	114	1	Guo et al., 2012
481	DQ08-68-7	40.9735	111.891	Daqingshan, Hohhot	Granite	LA-ICP-MS	132	2	Guo et al., 2012
482	07/23/00	41.0436	111.606	Daqingshan, Hohhot	Volcanic Rocks	40Ar-39Ar	125.7	0.6	Davis and Darby, 2010
483	07/26/00	41.0544	111.635	Daqingshan, Hohhot	Volcanic Rocks	40Ar-39Ar	125.8	0.6	Davis and Darby, 2010
484	07/20/01	40.9408	111.367	Daqingshan, Hohhot	Volcanic Rocks	40Ar-39Ar	125.5	0.7	Davis and Darby, 2010
485	07/21/01	40.958	111.369	Daqingshan, Hohhot	Volcanic Rocks	40Ar-39Ar	127.2	1	Davis and Darby, 2010
486	07/24/01	40.8426	111.568	Daqingshan, Hohhot	Volcanic Rocks	40Ar-39Ar	125.2	0.7	Davis and Darby, 2010
487	7/6/01/4	40.8711	111.547	Daqingshan, Hohhot	Volcanic Rocks	40Ar-39Ar	119.2	0.6	Davis and Darby, 2010
488	PRC-18	41.1333	111.767	Daqingshan, Hohhot	Granite	TIMS	119	2	Davis and Darby, 2010
489	PRC-28	41.0083	111.842	Daqingshan, Hohhot	Granite	TIMS	112	2	Davis and Darby, 2010
490	PRC-30	40.9845	112.082	Shenshuiliang, Hohhot	Monzogranite	TIMS	136	4	Davis and Darby, 2010
491	7602-22	41.1065	111.174	Daqingshan, Hohhot	Granite	40Ar-39Ar	124.7	0.6	Davis and Darby, 2010
492	7602-34	41.0153	111.293	Daqingshan, Hohhot	Basalt	40Ar-39Ar	135.5	1.3	Davis and Darby, 2010
493	04DS29	40.9929	111.229	Daqingshan, Hohhot	Basalt	40Ar-39Ar	132.6	2.4	Davis and Darby, 2010
494	37			Inner Mongolia	Rhyolite	40Ar-39Ar	123.3	1.2	Davis et al., 2001
495	Ls-9			North Wulatehouqi	Muscovite Granite	LA-ICP-MS	234	12	Gao, 2010
496	Ls-16			NW Qingshan	Muscovite Granite	LA-ICP-MS	235	5	Gao, 2010
497	Ls-25			South Chaodewenduer	Biotite Monzogranite	LA-ICP-MS	242	2	Gao, 2010
498	CGDLH05	41.888	110.827	Chegendalai	Granodiorite	SHRIMP	245	1	Zhang et al., 2010a
499	CGDLH04	41.888	110.827	Chegendalai	Diorite	SHRIMP	239	2	Zhang et al., 2010a
500	BEHT01	42.0119	110.179	Xibiehe	Alkaline Basalt	SHRIMP	224	2	Zhang et al., 2010a
501	--			Siziwangqi	Syenogranite	LA-ICP-MS	228	1	Liu, 2010
502	GS2			Bulong	Monzogranite	LA-ICP-MS	239	4	Liu, 2010
503	GS3			Ge’ertu	Syenogranite	LA-ICP-MS	238	6	Liu, 2010
504	GS4			Ge’ertu	Monzogranite	LA-ICP-MS	224	8	Liu, 2010
505	1P7b6-2			Taolegai, Daqingshan	Granite	SHRIMP	224	3	Zhao, 2010a
506	B5020-1			Shadegai, Wulashan	Granite	TIMS	211	1	Zhao, 2010a
507	PRC-18	41.1333	111.767	Naobaoshang	Granitoid Pluton	TIMS	119	2	Davis et al., 2001
508	WC08-06			Deshengying, eastern Daqingshan	Granite	SIMS	131	1	Meng et al., 2014
509	WC08-08			Xinisubei, eastern Daqingshan	Granite	SIMS	140	4	Meng et al., 2014
510	WC08-11			Gulouban	Granite	SIMS	145	1	Meng et al., 2014
511	WC08-12			Kuisu	Granite	SIMS	142	2	Meng et al., 2014

## Sheet: Great Xing'an Range (GXR)
Order	Sample	GPS location		Pluton	Lithology	Method	Age (Ma)		References
							206Pb/238U or 207Pb/206Pb	Error
1	0075-7	51.6064	124.324	Xinlinzhen	Granodiorite	LA-ICPMS	132	3	Y.L. Zhang et al. (2008)
2	0076-9	51.6278	124.156	Xinlinzhen	Granodiorite	LA-ICPMS	131	3	Y.L. Zhang et al. (2008)
3	GW03008	51.4969	124.385	Tayuan	Monzogranite	LA-ICPMS	318	4	Wu et al. (2011)
4	GW03015	51.4969	124.385	Tayuan	Gabbro	LA-ICPMS	322	5	Wu et al. (2011)
5	GW03017	51.3881	124.274	Tayuan	Monzogranite	LA-ICPMS	220	3	Wu et al. (2011)
6	GW03035	52.3617	124.797	Tahe	Gabbro	LA-ICPMS	490	2	Ge et al. (2005a)
7	GW03036	52.3617	124.797	Tahe	Alkali feldspar granite	LA-ICPMS	479	3	Ge et al. (2005a)
8	GW03042	52.1297	125.984	Xinghuadukou	Gneiss	LA-ICPMS	843	6	Wu et al. (2011)
9	GW03044	52.1297	125.984	Xinghuadukou	Monzogranite	LA-ICPMS	477	8	Wu et al. (2011)
10	GW03057	52.4425	124.835	Zhualuogu	Leucogabbro	LA-ICPMS	328	7	Zhou et al. (2005)
11	GW03061	52.4422	124.836	Zhualuogu	Leucogabbro	LA-ICPMS	336	15	Zhou et al. (2005)
12	GW03070	52.3544	124.704	Tahe	Syenogranite	LA-ICPMS	494	9	Ge et al. (2005a)
13	GW03085	52.3097	124.545	Tahe	Quartz monzonite	LA-ICPMS	485	3	Ge et al. (2005a)
14	GW03090	52.3025	124.402	Tahe	Syenogranite	LA-ICPMS	492	5	Ge et al. (2005a)
15	GW05037	52.3531	125.09	Chalaban	Monzogranite	LA-ICPMS	481	3	Ge et al. (2007a)
16	GW05049	52.4172	125.098	Shijiuzhan	Monzogranite	LA-ICPMS	499	2	Ge et al. (2007a)
17	GW05053	52.5533	125.754	Halabaqi	Monzogranite	LA-ICPMS	500	2	Sui et al. (2006)
18	GW05056	52.3911	125.876	Shibazhan	Monzogranite	LA-ICPMS	460	1	Ge et al. (2007a)
19	GW05058	52.4058	125.831	Halabaqi	Granodiorite	LA-ICPMS	461	1	Sui et al. (2006)
20	GW05067	52.5306	126.14	Zhengqi	Granodiorite	LA-ICPMS	190	1	Sui et al. (2006)
21	GW05099	52.0453	125.644	Hanjiayuanzi	Diorite	LA-ICPMS	188	2	Sui et al. (2006)
22	GW05104	52.0117	125.657	Hanjiayuanzi	Monzogranite	LA-ICPMS	501	2	Ge et al. (2007a)
23	0029	48.0583	121.207	Langfeng	Syenogranite	LA-ICPMS	337	8	Wu et al. (2011)
24	9411-26	48.0033	122.772	Zhalantun	Syenogranite	LA-ICPMS	301	3	Wu et al. (2011)
25	GW04465	50.3831	124.375	Jiageda	Granodiorite	LA-ICPMS	165	1	Wu et al. (2011)
26	GW04490	50.3981	124.106	Henannongchang	Syenogranite	LA-ICPMS	125	2	Wu et al. (2011)
27	GW04512	50.3839	125.653	Sankuanggou	Granodiorite	LA-ICPMS	177	3	Ge et al. (2007b)
28	GW04516	50.3806	125.731	Huaduoshan	Granodiorite	LA-ICPMS	176	3	Ge et al. (2007b)
29	GW05073	52.2672	126.325	Huairou	Monzogranite	LA-ICPMS	236	1	Wu et al. (2011)
30	GW05085	52.0064	126.213	Xinghua	Granodiorite	LA-ICPMS	178	1	Sui et al. (2007)
31	GW05112	51.8792	125.794	Jiweidianzi	Monzogranite	LA-ICPMS	181	2	Sui et al. (2007)
32	GW05120	51.8206	126.272	Jiweidianzi	Monzogranite	LA-ICPMS	176	2	Sui et al. (2007)
33	GW05157	51.1978	125.68	Shierzhan	Monzogranite	LA-ICPMS	300	2	Sui et al. (2009)
34	2002XT-11	50.1472	124.196	Xintian	Felsic dyke	SHRIMP	208	2	Miao (2003)
35	2002YW-26	50.1472	124.196	Guyuan	Plagiogranite	SHRIMP	226	2	Miao (2003)
36	9437	48.8072	121.703	Xing'an	Monzogranite	LA-ICPMS	309	4	Wu et al. (2011)
37	9801-2	49.0917	125.203	Xiaoshantun	Alkali feldspar granite	TIMS	285	2	Wu et al. (2002)
38	9805-2	49.9089	125.413	Sizhanlinchang	Syenogranite	TIMS	282	4	Wu et al. (2002)
39	FW04-407	49.2419	123.768	Yilinongchang	Monzogranite	LA-ICPMS	131	1	Wu et al. (2011)
40	FW04-412	49.5931	124.072	Yili	Granodiorite	LA-ICPMS	142	1	Wu et al. (2011)
41	FW04-413	49.1772	123.759	Nuomin	Monzogranite	LA-ICPMS	130	1	Wu et al. (2011)
42	FW04-414	48.2614	123.459	Dechang	2-mica monzogranite	LA-ICPMS	166	2	Wu et al. (2011)
43	FW04-416	48.6731	123.433	Sanchahe	Monzogranite	LA-ICPMS	179	1	Wu et al. (2011)
44	FW04-417	48.6325	123.224	Sanchahe	Monzogranite	LA-ICPMS	157	2	Wu et al. (2011)
45	FW04-423	48.0067	123.022	Jiusanzhan	Gneiss	LA-ICPMS	466	7	Wu et al. (2011)
46	FW04-424	48.0067	123.022	Jiusanzhan	Quartz diorite	LA-ICPMS	446	5	Wu et al. (2011)
47	FW04-425	48.0369	123.009	Jiusanzhan	Alkali feldspar granite	LA-ICPMS	359	4	Wu et al. (2011)
48	GW04014	48.3306	122.32	Lamashan	Monzogranite	LA-ICPMS	142	3	Wu et al. (2011)
49	GW04015	48.6133	122.095	Yalu	Monzogranite	LA-ICPMS	145	5	Wu et al. (2011)
50	GW04016	48.7875	121.795	Boketu	Diorite	LA-ICPMS	381	2	Wu et al. (2011)
51	GW04021	48.8072	121.703	Zhufeng	Diorite	LA-ICPMS	249	2	Wu et al. (2011)
52	GW04025	48.8217	121.666	Xing0an	Monzogranite	LA-ICPMS	267	3	Wu et al. (2011)
53	GW04201	46.9233	120.26	Niufentai	Monzogranite	LA-ICPMS	157	2	Wu et al. (2011)
54	GW04209	47.1333	120.056	Aershan	Monzogranite	LA-ICPMS	129	1	Wu et al. (2011)
55	GW04271	47.8767	121.341	Bashenghe	Syenogranite	LA-ICPMS	131	1	Wu et al. (2011)
56	GW04276	48.0886	121.839	Sanqilinchang	Quartz syenite	LA-ICPMS	143	3	Wu et al. (2011)
57	GW04278	47.8864	122.04	Jiqinhe	Quartz syenite	LA-ICPMS	129	2	Wu et al. (2011)
58	GW04309	47.7639	122.271	Xinlitun	Monzogranite	LA-ICPMS	133	1	Wu et al. (2011)
59	GW04448	50.7994	124.126	Yaolinger	Syenogranite	LA-ICPMS	125	1	Wu et al. (2011)
60	GW04459	50.5906	124.277	Cuifeng	Plagiogranite	LA-ICPMS	122	1	Wu et al. (2011)
61	GW05039	52.2797	125.025	Chalaban	Granodiorite	LA-ICPMS	477	2	Ge et al. (2007b)
62	GW05044	52.3097	125.041	Chalaban	Granodiorite	LA-ICPMS	465	2	Ge et al. (2007b)
63	G0206-1	46.49	122.487	Yonghetun	Monzodiorite	LA-ICPMS	127	2	Ge et al. (2005b)
64	G0206-2	46.49	122.487	Yonghetun	Porphyrite	LA-ICPMS	128	3	Ge et al. (2005b)
65	G0208-1	46.4947	122.125	Qingshan	Monzogranite	LA-ICPMS	138	3	Ge et al. (2005b)
66	G0208-3	46.4947	122.125	Qingshan	Monzogranite	LA-ICPMS	133	3	Ge et al. (2005b)
67	G0211-1	46.2261	121.482	Dashizhai	Monzogranite	LA-ICPMS	176	13	Ge et al. (2005b)
68	G0211-4	46.2261	121.482	Dashizhai	Monzogranite	LA-ICPMS	182	3	Ge et al. (2005b)
69	G0213-4	46.2261	121.482	Jingyang	Monzogranite	LA-ICPMS	176	4	Ge et al. (2005b)
70	G0215-4	46.6019	121.256	Suolun	Alkali feldspar granite	LA-ICPMS	126	2	Ge et al. (2005b)
71	G0217-1	46.4461	121.487	Chagan	Alkali feldspar granite	LA-ICPMS	229	3	Ge et al. (2005b)
72	G0217-2	46.4461	121.487	Chagan	Alkali feldspar granite	LA-ICPMS	236	2	Ge et al. (2005b)
73	GW04158	46.4117	121.24	Wulanmaodu	Syenogranite	LA-ICPMS	131	1	Wu et al. (2011)
74	GW04162	46.3539	121.092	Shabutai	Monzogranite	LA-ICPMS	129	2	Wu et al. (2011)
75	GW04190	46.6083	120.899	Jilasitai	Alkali feldspar granite	LA-ICPMS	135	2	Wu et al. (2011)
76	GW04314	47.3736	122.209	Fengshou	Syenogranite	LA-ICPMS	120	2	Wu et al. (2011)
77	GW04360	46.8058	122.55	Caishichangxi	Monzogranite	LA-ICPMS	120	1	Wu et al. (2011)
78	GW04364	46.9119	122.141	Shenshan	Alkali feldspar granite	LA-ICPMS	119	1	Wu et al. (2011)
79	GW04369	46.6828	121.22	Suolun	Alkali feldspar granite	LA-ICPMS	134	2	Wu et al. (2011)
80	05FW116	43.4369	117.496	Huanggangliang	Syenogranite	LA-ICPMS	132	1	Wu et al. (2011)
81	05FW120	43.3619	117.609	Dayingzi	Monzogranite	LA-ICPMS	132	1	Wu et al. (2011)
82	05FW121	43.4989	117.651	Huanggangliang	Monzogranite	LA-ICPMS	146	2	Wu et al. (2011)
83	05FW124	43.5192	117.624	Huanggangliang	Syenogranite	LA-ICPMS	141	1	Wu et al. (2011)
84	05FW133	43.7575	117.912	Donghuang	Gabbro	LA-ICPMS	252	5	Wu et al. (2011)
85	05FW137	43.7728	117.844	Banshantu	Syenogranite	LA-ICPMS	283	2	Wu et al. (2011)
86	05FW140	43.9283	118.019	Xinlin	Granodiorite	LA-ICPMS	241	2	Wu et al. (2011)
87	05FW141	44.1653	118.274	Chaoyanggou	Monzogranite	LA-ICPMS	132	1	Wu et al. (2011)
88	05FW147	44.1267	118.168	Chaoyanggou	Monzogranite	LA-ICPMS	142	3	Wu et al. (2011)
89	05FW148	44.1267	118.168	Chaoyanggou	Dioritic enclave	LA-ICPMS	150	4	Wu et al. (2011)
90	05FW150	44.2556	117.682	Mishengmiao	Quartz diorite	LA-ICPMS	303	3	Wu et al. (2011)
91	05FW155	44.1628	117.859	Qianjinchang	Granodiorite	LA-ICPMS	274	1	Wu et al. (2011)
92	05FW161	44.1403	117.922	Qianjinchang	Granodiorite	LA-ICPMS	275	2	Wu et al. (2011)
93	05FW162	44.1933	117.668	Daqingmuchang	Monzogranite	LA-ICPMS	274	4	Wu et al. (2011)
94	05FW163	44.0817	117.718	Beidashan	Granodiorite	LA-ICPMS	139	1	Wu et al. (2011)
95	05FW167	43.8661	117.569	Zhuanshanzi	Monzogranite	LA-ICPMS	246	2	Wu et al. (2011)
96	05FW171	43.9542	117.54	Beidashan	Syenogranite	LA-ICPMS	136	2	Wu et al. (2011)
97	05FW174	43.9781	117.107	Meilindaba	Quartz diorite	LA-ICPMS	301	1	Wu et al. (2011)
98	05FW176	43.9497	117.149	Dusheyetu	Monzogranite	LA-ICPMS	321	1	Wu et al. (2011)
99	05FW178	43.7508	117.123	Telegute	Monzogranite	LA-ICPMS	280	3	Wu et al. (2011)
100	05FW180	43.7508	117.123	Telegute	Dioritic dyke	LA-ICPMS	287	3	Wu et al. (2011)
101							149	2	Liu et al. (2005)
102							226	4	Liu et al. (2005)
103							111	1	Liu et al. (2005)
104							148	1	Liu et al. (2005)
105							117	4	Liu et al. (2005)
106	05FW064	43.2258	117.542	Jingpeng	Monzogranite	LA-ICPMS	141	1	Wu et al. (2011)
107	05FW065	43.2258	117.542	Jingpeng	Monzogranite	LA-ICPMS	140	2	Wu et al. (2011)
108	05FW066	43.2339	117.532	Jingpeng	Quartz syenite	LA-ICPMS	134	1	Wu et al. (2011)
109	05FW080	43.2639	117.749	Jingpeng	Monzogranite	LA-ICPMS	140	2	Wu et al. (2011)
110	05FW083	43.2522	117.82	Baiyinbangou	Monzogranite	LA-ICPMS	131	2	Wu et al. (2011)
111	21NMG-105	45.6747	117.459	Baolige	Monzogranite	SHRIMP	296	7	Miao (2003)
112	D98-1			Shuangjing	2-mica granite	SHRIMP	229	4	J.Y. Li et al. (2007)
113	D105-3			Shuangjing	2-mica granite	SHRIMP	254	4	J.Y. Li et al. (2007)
114	42-79	44.2706	117.83	Jinxing	Quartz diorite	LA-ICPMS	322	2	J.F. Liu et al. (2009)
115	38-72	44.1306	117.551	Daqihundi	Quartz diorite	LA-ICPMS	325	3	J.F. Liu et al. (2009)
116	05FW090	43.2567	118.151	Wanbao	Gneiss	LA-ICPMS	499	3	Wu et al. (2011)
117	05FW092	43.2567	118.151	Wanbao	Mylonitic granite	LA-ICPMS	237	3	Wu et al. (2011)
118	05FW095	43.2567	118.151	Wanbao	Monzogranite	LA-ICPMS	222	3	Wu et al. (2011)
119	05FW096	43.3378	118.277	Fangkuanggou	Gneiss	LA-ICPMS	274	2	Wu et al. (2011)
120	05FW097	43.3492	118.269	Xiahaisugou	Gneiss	LA-ICPMS	261	6	Wu et al. (2011)
121	05FW098	43.3408	118.456	Xiahaisugou	Gneiss	LA-ICPMS	259	2	Wu et al. (2011)
122	05FW099	43.3408	118.456	Yuanbaoshan	Monzogranite	LA-ICPMS	273	3	Wu et al. (2011)
123	05FW102	43.3444	118.44	Xiahaisugou	Gneiss	LA-ICPMS	237	2	Wu et al. (2011)
124	05FW110	43.2992	118.416	Shuangjing	Diorite	LA-ICPMS	246	2	Wu et al. (2011)
125	05FW111	43.2992	118.416	Shuangjing	Gneiss	LA-ICPMS	247	3	Wu et al. (2011)
126	05FW116	43.4369	117.496	Huanggangliang	Syenogranite	LA-ICPMS	132	1	Wu et al. (2011)
127	GW03285	52.0575	122.093	Dyke	Dolerite	LA-ICPMS	133	3	Zhang et al., .2008
128	9411-A	48.0033	122.772	Dyke	Granite–Porphyry	LA-ICPMS	130	1	Zhang et al., .2008
129	GW04005	48.0033	122.772	Dyke	Coarse dolerite	LA-ICPMS	124	2	Zhang et al., .2008
130	FW04-420	48.2753	123.637	Yilikede	Basaltic andesite	LA-ICPMS	123	2	Zhang et al., .2008
131	GW03120	52.6608	124.328	Yilikede	Basalt	LA-ICPMS	126	5	Zhang et al., .2008
132	GW04027	48.8531	121.624	Yilikede	Basalt	40Ar–39Ar	112.2	2.1	Zhang et al., .2008
133	GW04032	49.1169	120.929	Yilikede	Basalt	40Ar–39Ar	117.5	1.3	Zhang et al., .2008
134	FW04-401	49.2419	123.768	Shangkuli	Andesite	LA-ICPMS	123	1	Zhang et al., .2008
135	FW04-409	49.5667	124.238	Shangkuli	Rhyolite	LA-ICPMS	118	2	Zhang et al., .2008
136	FW04-418	48.3839	123.324	Shangkuli	Dacite	LA-ICPMS	113	2	Zhang et al., .2008
137	FW04-419	48.2625	123.763	Shangkuli	Dacite	LA-ICPMS	116	1	Zhang et al., .2008
138	GW04029	48.8014	121.159	Shangkuli	Rhyolite	LA-ICPMS	119	2	Zhang et al., .2008
139	GW04034	49.1208	120.906	Shangkuli	Rhyolite	LA-ICPMS	111	1	Zhang et al., .2008
140	GW04036	50.2464	120.469	Shangkuli	Rhyolite	LA-ICPMS	119	2	Zhang et al., .2008
141	GW04044	51.5344	122.019	Shangkuli	Rhyolite-Porphyry	LA-ICPMS	135	1	Zhang et al., .2008
142	GW03148	52.6408	124.686	Shangkuli	Rhyolite	LA-ICPMS	128	1	Zhang et al., .2008
143	GW03155	52.6408	124.686	Shangkuli	Rhyolite	LA-ICPMS	125	1	Zhang et al., .2008
144	GW04037	50.4344	120.15	Tamulangou	Olivine basalt	LA-ICPMS	139	2	Zhang et al., .2008
145	GW04037	50.4344	120.15	Tamulangou	Olivine basalt	Ar-Ar	139.9	1.8	Zhang et al., .2008
146	9434	48.7367	121.922	Tamulangou	Rhyolitic tuff	TIMS	139	1	Zhang et al., .2008
147	9422	48.2992	122.319	Tamulangou	Rhyolitic tuff	TIMS	141	4	Zhang et al., .2008
148	GW04010	48.2169	122.344	Tamulangou	Rhyolitic tuff	LA-ICPMS	146	2	Zhang et al., .2008
149	GW04011	48.2992	122.319	Tamulangou	Rhyolitic tuff	LA-ICPMS	148	2	Zhang et al., .2008
150	GW04257	48.1536	121.246	Tamulangou	Basalt	LA-ICPMS	128	8	Zhang et al., .2008
151	GW04042	51.4322	121.531	Tamulangou	Basalt	Ar-Ar	186.3	2.8	Zhang et al., .2008
152	MZL04-6	49.4728	117.428	Tamulan	Basalt	Ar-Ar	160	0.8	Wang et al., .2006
153	MZL10	48.2694	116.255	Tamulan	Basalt	Ar-Ar	162.6	0.7	Wang et al., .2006
154	MZL13	48.2603	116.276	Tamulan	Basaltic andesite	Ar-Ar	162	0.8	Wang et al., .2006
155	MZL16	48.2337	116.297	Tamulan	Basalt	Ar-Ar	147	0.8	Wang et al., .2006
156	ERBY04-1	49.8422	119.959	Tamulan	Basalt	Ar-Ar	139.7	0.7	Wang et al., .2006
157	ERBY04-4	49.8464	119.96	Tamulan	Basaltic andesite	Ar-Ar	140.3	0.7	Wang et al., .2006
158	ERBY1-9	49.8422	119.96	Tamulan	Basalt	Ar-Ar	142.7	0.7	Wang et al., .2006
159	GH07	50.3317	120.248	Shangkuli	Basalt	Ar-Ar	123.3	0.6	Wang et al., .2006
160	GH10	50.4396	120.803	Shangkuli	Basalt	Ar-Ar	121.2	0.6	Wang et al., .2006
161	TH08	52.3251	124.678	Shangkuli	Basalt	Ar-Ar	123.7	0.6	Wang et al., .2006
162	TH24	52.6605	124.327	Shangkuli	Basaltic andesite	Ar-Ar	125.6	0.6	Wang et al., .2006
163	TH22	52.4669	124.557	Shangkuli	Basalt	Ar-Ar	122.3	0.6	Wang et al., .2006
164	ELC04-1	50.6678	122.599	Shangkuli	Basalt	Ar-Ar	124.5	0.6	Wang et al., .2006
165	ZLT04-8	48.0028	122.772	Shangkuli	Basalt	Ar-Ar	122.2	0.6	Wang et al., .2006
166	GH04-1	50.3589	120.447	Shangkuli	Basalt	Ar-Ar	123.9	0.6	Wang et al., .2006
167	YKSNQ04-4	49.2061	120.614	Yiliekede	Basalt	Ar-Ar	115.8	0.6	Wang et al., .2006
168	GH04-4	50.9881	121.321	Yiliekede	Basalt	Ar-Ar	114.5	0.6	Wang et al., .2006
169	YKS04-3	48.8444	121.581	Yiliekede	Basalt	Ar-Ar	106.2	0.6	Wang et al., .2006
170	JGD04-4	49.9481	124.38	Yiliekede	Basalt	Ar-Ar	115.3	0.6	Wang et al., .2006
171	ER18-1	50.7339	120.199	Wanbao	Basaltic andesite		182	2	Xu et al., 2013--JAES
172	MZ2-1	49.2956	117.525	Shangkuzi	Pyroxene andesite		166	2	Meng et al. (2011)
173	ER17-1	50.7458	120.189	Shangkuli	Rhyolite		143	4	Xu et al. (2011)
174	ZKX24-04	49.36	117.558	Shangkuli	Trachydacite		142	1	Meng et al. (2011)
175	MZ1-1	49.2925	117.527	Shangkuli	Dacitic ignimbrite		141	1	Meng et al. (2011)
176	MZ21-1	49.445	117.042	Tamulantou	Olivne basalt		129	2	Meng et al. (2011)
177	ZKX24-00	49.3211	117.539	Shangkuzi	Basaltic andesite		123	2	Meng et al. (2011)
178	ER3-1	50.3325	120.25	Tamulangou	Basaltic andesite		125	2	Xu et al. (2011)
179	ER19-2	50.7103	120.214	Tamulantou	Basaltic andesite		127	1	Xu et al. (2011)
180	ZKD2-1	50.7756	120.193	Tamulantou	Basaltic andesite		128	3	Xu et al. (2011)
181	MZ20-1	49.4242	117.08	Shangkuzi	Trachydacite		127	3	Meng et al. (2011)
182	ER16-1	50.7658	120.177	Tamulantou	Rhyolite		124	1	Xu et al. (2011)
183	MZ5-3	49.335	117.509	Shangkuzi	Dacite		125	1	Meng et al. (2011)
184	MZ7-1	49.3544	117.573	Shangkuli	Andesite		125	2	Meng et al. (2011)
185	ER1-1	49.9992	120.114	Meiletu	Trachyandesite		128	2	Xu et al. (2011)
186	ER9-1	50.7867	119.882	Shangkuli	Trachydacite		125	1	Xu et al. (2011)
187	MZ10-1	49.3989	117.422	Shangkuzi	Pyroxene andesite		125	2	Meng et al. (2011)
188	ER5-1	50.4372	120.015	Tamulangou	Andesite		114	3	Xu et al. (2011)
189	05FW060	43.0086	118.401	Manketouebo	Rhyolite	LA-ICP-MS	174	4	Zhang et al., 2010
190	06ZH032	44.8864	119.394	Manketouebo	Rhyolite	LA-ICP-MS	133	2	Zhang et al., 2010
191	06ZH110	43.0397	118.351	Manketouebo	Rhyolite	LA-ICP-MS	154	1	Zhang et al., 2010
192	07ZH097	45.6022	119.553	Manketouebo	Rhyolite	LA-ICP-MS	150	2	Zhang et al., 2010
193	07ZH110	45.2356	119.898	Manketouebo	Rhyolite	LA-ICP-MS	156	1	Zhang et al., 2010
194	II06029-1	45.2322	119.913	Manketouebo	Rhyolite	LA-ICP-MS	153	8	Zhang et al., 2010
195	07ZH172	44.0817	118.764	Manketouebo	Rhyolite	LA-ICP-MS	163	1	Zhang et al., 2010
196	II06031-2	44.0933	118.791	Manketouebo	Rhyolite	LA-ICP-MS	160	2	Zhang et al., 2010
197	II06032-1	44.0933	118.791	Manketouebo	Rhyolite	LA-ICP-MS	165	1	Zhang et al., 2010
198	07ZH017	46.2544	121.093	Manketouebo	Dacite	LA-ICP-MS	138	1	Zhang et al., 2010
199	07ZH155	45.0958	120.736	Manketouebo	Dacite	LA-ICP-MS	151	1	Zhang et al., 2010
200	GW04199	46.6611	120.141	Manketouebo	Dacite	LA-ICP-MS	124	2	Zhang et al., 2010
201	07ZH104	45.5456	119.529	Manketouebo	Andesite	LA-ICP-MS	157	2	Zhang et al., 2010
202	07ZH140	44.9433	121.025	Manketouebo	Andesite	LA-ICP-MS	150	3	Zhang et al., 2010
203	07ZH086	45.5572	120.896	Manketouebo	Rhyolitic tuff	LA-ICP-MS	128	1	Zhang et al., 2010
204	07ZH208	43.1094	117.676	Manketouebo	Ignimbrite	LA-ICP-MS	135	2	Zhang et al., 2010
205	07ZH224	43.0167	118.381	Manketouebo	Ignimbrite	LA-ICP-MS	153	2	Zhang et al., 2010
206	07ZH006	46.1478	121.292	Manitu	Andesite	LA-ICP-MS	151	2	Zhang et al., 2010
207	07ZH181	44.0831	118.76	Manitu	Andesite	LA-ICP-MS	138	1	Zhang et al., 2010
208	06ZH049	44.9239	120.545	Manitu	Andesite	LA-ICP-MS	132	1	Zhang et al., 2010
209	G0221-2	44.9908	121.284	Manitu	Hornblende andesite	LA-ICP-MS	129	2	Zhang et al., 2010
210	GW04136	45.9289	121.778	Manitu	Pyroxene-andesite	LA-ICP-MS	125	1	Zhang et al., 2010
211	GW04137	45.7878	121.677	Manitu	Pyroxene-andesite	Ar-Ar	128.6	3.1	Zhang et al., 2010
212	07ZH236	43.0675	118.601	Manitu	Dacite	LA-ICP-MS	156	1	Zhang et al., 2010
213	07ZH193	43.6853	118.712	Manitu	Rhyolite	LA-ICP-MS	155	1	Zhang et al., 2010
214	07ZH081	45.5708	120.888	Manitu	Rhyolitic tuff	LA-ICP-MS	126	1	Zhang et al., 2010
215	436			Baiyingaolao	Rhyolite	TIMS	125.9	1.2	Zhang et al., 2010
216	GW04185	46.355	120.572	Baiyingaolao	Rhyolite	LA-ICP-MS	135	1	Zhang et al., 2010
217	GW04215	47.1519	119.943	Baiyingaolao	Rhyolite	LA-ICP-MS	124	1	Zhang et al., 2010
218	06ZH015	44.2789	118.591	Baiyingaolao	Rhyolite	LA-ICP-MS	131	1	Zhang et al., 2010
219	06ZH043	45.1256	120.019	Baiyingaolao	Rhyolite	LA-ICP-MS	129	1	Zhang et al., 2010
220	06ZH055	45.0922	120.377	Baiyingaolao	Felsite	LA-ICP-MS	132	1	Zhang et al., 2010
221	07ZH078	45.6556	120.794	Baiyingaolao	Dacite	LA-ICP-MS	131	1	Zhang et al., 2010
222	07ZH012	46.1322	121.173	Baiyingaolao	Ignimbrite	LA-ICP-MS	137	1	Zhang et al., 2010
223	07ZH170	43.9331	119.295	Baiyingaolao	Ignimbrite	LA-ICP-MS	138	1	Zhang et al., 2010
224	07ZH212	43.1317	117.694	Baiyingaolao	Ignimbrite	LA-ICP-MS	139	2	Zhang et al., 2010
225	07ZH028	46.0456	121.122	Meiletu	Andesite	LA-ICP-MS	128	9	Zhang et al., 2010
226	07ZH142	45.0397	120.923	Meiletu	Andesite	LA-ICP-MS	128	1	Zhang et al., 2010
227	07ZH072	45.8692	120.878	Meiletu	Hornblende andesite	LA-ICP-MS	128	2	Zhang et al., 2010
228	07ZH116	45.2847	120.577	Meiletu	Hornblende andesite	LA-ICP-MS	134	2	Zhang et al., 2010
229	06ZH036	45.215	119.545	Meiletu	Pyroxene-andesite	LA-ICP-MS	131	1	Zhang et al., 2010
230	06ZH060	45.2608	120.573	Meiletu	Biotite-andesite	LA-ICP-MS	128	1	Zhang et al., 2010
231	07ZH065	45.6397	121.181	Meiletu	Basaltic andesite	LA-ICP-MS	126	4	Zhang et al., 2010

## Sheet:  Erguna Region (EGN)
Order	Latitude (N)	Longitude (E)	Method	Age (Ma)		Reference
				206Pb/238U or 207Pb/206Pb	Error
1	48.6419	116.136	LA-ICP-MS	251	3	Gou et al., 2013, JAES
2	48.6942	116.239	LA-ICP-MS	189	4	Sun et al., 2013, International Geology Review
3			LA-ICP-MS	257	2	Gou et al., 2013, JAES
4	48.9928	116.261	LA-ICP-MS	252	3	Gou et al., 2013, JAES
5			LA-ICP-MS	178	1	She et al., 2012, Acta Petrologica Sinica
6	49.4067	117.319	LA-ICP-MS	198	3	She et al., 2011, Journal of Jilin University
7	49.4075	117.32	LA-ICP-MS	180	2	Wang et al., 2012, Geological Journal of China Universities
8	49.4206	117.297	LA-ICP-MS	180	1	Wang et al., 2014, Global Geology
9	49.4206	117.298	LA-ICP-MS	183	2	Wang et al., 2012, Geological Journal of China Universities
10	49.4281	117.294	LA-ICP-MS	180	1	She et al., 2012, Acta Petrologica Sinica
11	49.4283	117.294	LA-ICP-MS	182	3	She et al., 2012, Acta Petrologica Sinica
12	49.4286	117.296	LA-ICP-MS	204	3	She et al., 2011, Journal of Jilin University
13	49.4422	117.058	LA-ICP-MS	179	1	Wang et al., 2014, Global Geology
14	49.7814	119.937	LA-ICP-MS	256	3	Gou et al., 2013, JAES
15	49.9839	119.14	LA-ICP-MS	228	2	Tang et al., 2016, Doctoral Disseration of Jilin University
16	49.9839	119.14	LA-ICP-MS	228	2	Tang et al., 2016, Doctoral Disseration of Jilin University
17	50.6433	120.161	LA-ICP-MS	186	3	Wang et al., 2012, Geological Journal of China Universities
18	50.7069	119.569	LA-ICP-MS	224	2	Tang et al., 2016, Doctoral Disseration of Jilin University
19	50.7436	119.532	LA-ICP-MS	202	2	Tang et al., 2016, Doctoral Disseration of Jilin University
20	50.7742	119.531	LA-ICP-MS	203	3	Tang et al., 2016, Doctoral Disseration of Jilin University
21	50.7914	120.093	LA-ICP-MS	241	1	Wang et al., 2012, Geological Journal of China Universities
22	50.8103	120.081	LA-ICP-MS	185	1	Wang et al., 2012, Geological Journal of China Universities
23	50.8608	120.025	LA-ICP-MS	229	4	Wang et al., 2012, Geological Journal of China Universities
24	50.9772	119.685	LA-ICP-MS	246	1	Tang et al., 2016, Doctoral Disseration of Jilin University
25	50.9772	119.685	LA-ICP-MS	125	2	Tang et al., 2016, Doctoral Disseration of Jilin University
26	51.0539	120.039	LA-ICP-MS	242	3	Tang et al., 2016, Doctoral Disseration of Jilin University
27	51.1883	120.034	LA-ICP-MS	247	2	Tang et al., 2016, Doctoral Disseration of Jilin University
28	51.3117	120.966	LA-ICP-MS	195	1	Tang et al., 2016, Doctoral Disseration of Jilin University
29	51.2936	120.604	LA-ICP-MS	205	3	She et al., 2012, Acta Petrologica Sinica
30	51.3131	120.429	LA-ICP-MS	205	2	Tang et al., 2016, Doctoral Disseration of Jilin University
31	51.3183	120.367	LA-ICP-MS	206	2	Tang et al., 2016, Doctoral Disseration of Jilin University
32	51.3317	120.666	LA-ICP-MS	198	2	Wu et al., 2011, JAES
33	51.3539	120.308	LA-ICP-MS	206	2	Tang et al., 2016, Doctoral Disseration of Jilin University
34	51.33	120.58	LA-ICP-MS	242	3	Tang et al., 2016, Doctoral Disseration of Jilin University
35	51.33	120.58	LA-ICP-MS	244	3	Tang et al., 2016, Doctoral Disseration of Jilin University
36	51.3436	121.504	LA-ICP-MS	196	1	Tang et al., 2016, Doctoral Disseration of Jilin University
37	51.3642	121.51	LA-ICP-MS	197	4	Wu et al., 2011, JAES
38	51.4058	121.816	LA-ICP-MS	201	2	She et al., 2011, Journal of Jilin University
39	51.4711	120.888	LA-ICP-MS	200	5	She et al., 2011, Journal of Jilin University
40	51.4711	120.888	LA-ICP-MS	200	4	She et al., 2011, Journal of Jilin University
41	51.4892	120.813	LA-ICP-MS	205	1	Tang et al., 2016, Doctoral Disseration of Jilin University
42	51.4758	120.833	LA-ICP-MS	244	4	She et al., 2011, Journal of Jilin University
43			LA-ICP-MS	202	6	Chen et al., 2010
44	51.5786	121.76	LA-ICP-MS	197	2	Tang et al., 2016, Doctoral Disseration of Jilin University
45			SHRIMP	130	1	Ding et al., 2010, Master Dissertation of Jilin University
46	51.6714	121.535	LA-ICP-MS	204	1	Tang et al., 2016, Doctoral Disseration of Jilin University
47	51.6714	121.535	LA-ICP-MS	204	2	Tang et al., 2016, Doctoral Disseration of Jilin University
48	51.8478	121.892	LA-ICP-MS	208	1	Wu et al., 2011, JAES
49	51.8628	120.931	LA-ICP-MS	246	1	Tang et al., 2016, Doctoral Disseration of Jilin University
50	51.8767	120.919	LA-ICP-MS	259	8	She et al., 2012, Acta Petrologica Sinica
51	52.0436	120.863	LA-ICP-MS	205	1	Tang et al., 2016, Doctoral Disseration of Jilin University
52	52.0572	122.093	SIMS	227	6	Tang et al., 2016, Doctoral Disseration of Jilin University
53	52.0947	121.894	LA-ICP-MS	187	3	Wu et al., 2011, JAES
54	52.1267	122.065	LA-ICP-MS	189	2	Wu et al., 2011, JAES
55	52.1842	120.87	LA-ICP-MS	207	5	Sun et al., 2013, International Geology Review
56	52.2067	121.653	LA-ICP-MS	206	1	Tang et al., 2016, Doctoral Disseration of Jilin University
57	52.3142	120.994	LA-ICP-MS	210	2	Sun et al., 2013, International Geology Review
58	52.3203	122.434	LA-ICP-MS	188	3	Sun et al., 2013, International Geology Review
59	52.3522	121.021	LA-ICP-MS	213	2	Sun et al., 2013, International Geology Review
60	52.4192	122.567	LA-ICP-MS	200	1	Tang et al., 2016, Doctoral Disseration of Jilin University
61	52.4228	121.33	LA-ICP-MS	193	2	Sun et al., 2013, International Geology Review
62	52.4244	121.33	LA-ICP-MS	195	2	Wu et al., 2011, JAES
63	52.4517	121.239	LA-ICP-MS	207	4	Sun et al., 2013, International Geology Review
64	52.4664	123.083	LA-ICP-MS	187	2	Wu et al., 2011, JAES
65	52.4781	121.875	LA-ICP-MS	194	7	Wu et al., 2011, JAES
66	52.4889	121.043	LA-ICP-MS	210	2	Sun et al., 2013, International Geology Review
67	52.5094	121.082	LA-ICP-MS	220	3	Wu et al., 2011, JAES
68	52.5608	120.961	LA-ICP-MS	201	1	Wu et al., 2011, JAES
69	52.6372	121.889	LA-ICP-MS	189	2	Wu et al., 2011, JAES
70	52.6408	123.686	LA-ICP-MS	182	1	Wu et al., 2011, JAES
71	52.6494	123.149	LA-ICP-MS	192	3	Wu et al., 2011, JAES
72			SHRIMP	193	6	Wu et al., 2006, Doctoral Dissertation of Jilin University
73			SHRIMP	251	6	Wu et al., 2006, Doctoral Dissertation of Jilin University
74	52.7006	121.916	LA-ICP-MS	189	2	Wu et al., 2011, JAES
75	52.7458	120.294	LA-ICP-MS	250	3	Sun et al., 2013, International Geology Review
76	52.7633	121.994	LA-ICP-MS	187	3	Sun et al., 2013, International Geology Review
77	52.7661	120.076	LA-ICP-MS	253	3	Sun et al., 2013, International Geology Review
78	52.8175	122.602	LA-ICP-MS	187	3	Sun et al., 2013, International Geology Review
79	52.8175	123.601	LA-ICP-MS	193	2	Wu et al., 2011, JAES
80	52.8853	122.329	LA-ICP-MS	199	2	Sun et al., 2013, International Geology Review
81	52.8944	120.716	LA-ICP-MS	249	4	Wu et al., 2011, JAES
82	52.915	121.106	LA-ICP-MS	248	4	Sun et al., 2013, International Geology Review
83			TIMS	254	4	Zhang et al., 2003, Journal of Jilin University
84	49.9369	118.831	LA-ICP-MS	155	3	Tang et al., 2016, Doctoral Disseration of Jilin University
85	49.9417	118.832	LA-ICP-MS	152	2	Tang et al., 2016, Doctoral Disseration of Jilin University
86	49.9436	118.838	LA-ICP-MS	150	2	Tang et al., 2016, Doctoral Disseration of Jilin University
87	51.2206	119.818	LA-ICP-MS	155	1	Tang et al., 2016, Doctoral Disseration of Jilin University
88	51.2314	119.815	LA-ICP-MS	155	1	Tang et al., 2016, Doctoral Disseration of Jilin University
89	52.2197	121.559	LA-ICP-MS	156	2	Tang et al., 2016, Doctoral Disseration of Jilin University
90	52.1589	121.501	LA-ICP-MS	155	1	Tang et al., 2016, Doctoral Disseration of Jilin University
91	50.7797	119.529	LA-ICP-MS	140	1	Tang et al., 2016, Doctoral Disseration of Jilin University
92	49.4061	117.598	LA-ICP-MS	134	1	Wang et al., 2012, Geological Journal of China Universities
93			LA-ICP-MS	171	2	Wang et al., 2012, Geological Journal of China Universities
94	48.2656	117.085	LA-ICP-MS	134	2	Wang et al., 2012, Geological Journal of China Universities
95			LA-ICP-MS	145	5	Wang et al., 2012, Geological Journal of China Universities
96			LA-ICP-MS	153	1	Wang et al., 2012, Geological Journal of China Universities
97	49.3867	117.559	LA-ICP-MS	150	1	Wang et al., 2012, Geological Journal of China Universities
98	51.8961	121.002	LA-ICP-MS	139	1	She et al., 2012, Acta Petrologica Sinica
99			LA-ICP-MS	151	9	She et al., 2012, Acta Petrologica Sinica
100	49.4392	117.101	LA-ICP-MS	144	3	She et al., 2012, Acta Petrologica Sinica
101	51.6064	124.324	LA-ICP-MS	132	3	Zhang et al., 2008, Journal of Jilin University
102	51.6278	124.156	LA-ICP-MS	131	3	Zhang et al., 2008, Journal of Jilin University
103	51.4383	122.244	LA-ICP-MS	125	2	Wu et al., 2011, JAES
104	52.0575	122.093	LA-ICP-MS	132	2	Wu et al., 2011, JAES
105	48.8358	116.172	LA-ICP-MS	149	2	Wang et al., 2014, Global Geology
106	48.5236	116.118	LA-ICP-MS	151	1	Wang et al., 2014, Global Geology
107			LA-ICP-MS	137	2	Wang et al., 2014, Global Geology
108	48.5236	116.118	LA-ICP-MS	137	4	Wang et al., 2014, Global Geology
109	48.2386	117.061	LA-ICP-MS	142	2	Wang et al., 2014, Global Geology
110	48.2506	117.091	LA-ICP-MS	149	1	Wang et al., 2014, Global Geology
111			SHRIMP	126	2	Wu et al., 2006, Doctoral Dissertation of Jilin University
112			SHRIMP	128	2	Wu et al., 2006, Doctoral Dissertation of Jilin University
113			LA-ICP-MS	131	2	Wang et al., 2010, Geology and Resources
114			LA-ICP-MS	184	3	Wang et al., 2010, Acta Petrologica et Mineralogica
115			LA-ICP-MS	194	3	Wang et al., 2010, Acta Petrologica et Mineralogica
116			LA-ICP-MS	199	4	Wang et al., 2010, Acta Petrologica et Mineralogica

## Sheet: Songliao Basin (SB)
Order	Sample	GPS location		Pluton	Lithology	Method	Age (Ma)		References
							206Pb/238U or 207Pb/206Pb	Error
1	PK10-6	43.8919	124.247	Huoshiling	Trachydacite		129	2	Pei et al., 2008
2	SN190-12	44.9167	123.412	Huoshiling	Trachyandesite		133	1	Pei et al., 2008
3	SN72-5	43.6811	124.616	Yingcheng	Basaltic andesite		118	6	Pei et al., 2008
4	SN56-7	43.7994	124.485	Yingcheng	Trachyandesite		116	1	Pei et al., 2008
5	L47-1	43.8197	124.476	Yingcheng	Basaltic andesite		114	4	Pei et al., 2008
6	SN108-2	43.6811	124.045	Yingcheng	Rhyolite		119	1	Pei et al., 2008
7	SN118-1	43.8444	124.542	Yingcheng	Basaltic andesite		110	16	Pei et al., 2008
8	2003JS5	43.8394	124.532	Drill hole	Diorite		1839	7	Y. Wang et al. (2006)
9	2003JY1			Drill hole	Monzogranite		331	8	Wang and Wang (2007)
10	L44-1	43.8042	124.527	Drill hole	Granite		1873	13	Pei et al., 2007
11	L45-3	43.8386	124.532	Drill hole	Gabbro		1808	21	Pei et al., 2007
12	Q2-1	43.7789	124.575	Drill hole	Granite		161	5	Gao et al., 2007
13	SN121	43.7886	124.599	Drill hole	Monzogranite		165	2	Gao et al., 2007
14	SN122	43.805	124.619	Drill hole	Monzogranite		181	3	Gao et al., 2007
15	SN72	43.805	124.619	Drill hole	Syenogranite		161	4	Gao et al., 2007
16	T6-1	45.4853	123.181	Drill hole	Quartz		236	3	Gao et al., 2007
17	YC1-1	45.0686	126.379	Drill hole	Diorite		319	1	Gao et al., 2007
18	YC1-2	45.0686	126.379	Drill hole	Syenogranite		361	2	Gao et al., 2007
19	DuI-4			Drill hole	Granodiorite		305	2	Wu et al., 2001a
20	Ershen-1			Drill hole	Mylonitic granodiorite		165	3	Wu et al., 2001a
21	18SB-18c			Basin margin	Andesitic crystal tuff	LA-ICP-MS	112.7	3.8	Our unpublished data
22	DS7-1			Dehui graben	Rhyolite	LA-ICP-MS	118	2	Chen et al., 2020
23	N47-1			Dehui graben	Rhyolite	LA-ICP-MS	113	2	Chen et al., 2020
24	GW008	46.1539	125.328	Shengshen202	Rhyolite	LA-ICP-MS	104	1	Ji et al., 2019
25	GW009	46.1539	125.328	Shengshen202	Rhyolite	LA-ICP-MS	106	2	Ji et al., 2019
26	GW033	45.9614	125.368	Xushen04	Rhyolite	LA-ICP-MS	105	2	Ji et al., 2019
27	GW066	46.6185	125.867	Ren11	Rhyolite	LA-ICP-MS	109	2	Ji et al., 2019
28	GW067	46.6185	125.867	Ren11	Rhyolite	LA-ICP-MS	108	2	Ji et al., 2019
29	GW068	46.6185	125.867	Ren11	Rhyolite	LA-ICP-MS	114	2	Ji et al., 2019
30	GW090	46.5802	127.007	Suishen	Andesite	LA-ICP-MS	105	2	Ji et al., 2019
31	GW092	46.5802	127.007	Suishen	Andesite	LA-ICP-MS	107	2	Ji et al., 2019
32	GW093	46.5802	127.007	Suishen	Andesite	LA-ICP-MS	110	1	Ji et al., 2019
33	GW126	46.4577	125.253	Dashen1	Rhyolite	LA-ICP-MS	105	2	Ji et al., 2019
34	06GW001	45.9572	125.305	Xujiaweizi graben	Rhyolite	LA-ICP-MS	106	3	Ji et al., 2019
35	06GW002	45.9572	125.305	Xujiaweizi graben	Rhyolite	LA-ICP-MS	102	3	Ji et al., 2019
36	X13530			Changling graben	Trachyte	LA-ICP-MS	102	1	Chang et al., 2017
37	Y33533			Changling graben	Rhyolite	LA-ICP-MS	102	1	Chang et al., 2017
38	X14411			Changling graben	Andesite	LA-ICP-MS	124	2	Chang et al., 2017
39	YN13835			Changling graben	Rhyolite	LA-ICP-MS	105	1	Chang et al., 2017
40	Y1013865			Changling graben	Trachyte tuff	LA-ICP-MS	106	1	Chang et al., 2017
41	Y34328			Changling graben	Rhyolite	LA-ICP-MS	122	1	Chang et al., 2017
42	L24414			Changling graben	Rhyolite	LA-ICP-MS	105	1	Chang et al., 2017
43	P2			Basin margin	Rhyolitic tuff	SHRIMP	111.9	2.2	Wang et al., 2016
44	P5			Basin margin	Rhyolite	SHRIMP	113.9	0.5	Wang et al., 2016
45	P6			Basin margin	Rhyolitic tuff	SHRIMP	115.2	0.5	Wang et al., 2016
46	P11			Basin margin	Rhyolitie	SHRIMP	114.3	0.5	Wang et al., 2016
47	YS3			Changling graben	Rhyolitic tuff	LA-ICP-MS	117	1	Wang et al., 2016
48	YS7			Changling graben	Rhyolitic tuff	LA-ICP-MS	118	2	Wang et al., 2016
49	XS1			Changling graben	Trachyte	LA-ICP-MS	119	3	Wang et al., 2016
50	S101			Changling graben	Rhyolitic tuff	LA-ICP-MS	118	1	Wang et al., 2016
51	SL0904			Basin margin	Rhyolite	LA-ICP-MS	113	2	Li et al., 2015
52	SL0919			Basin margin	Rhyolite	LA-ICP-MS	114	2	Li et al., 2015
53	YS4-1			Changling graben	Rhyolitie	LA-ICP-MS	112	2	Liu, 2014
54	YS5-2			Changling graben	Rhyolitie	LA-ICP-MS	104	3	Liu, 2014
55	YS201-1			Changling graben	Alkaline rhyolite	LA-ICP-MS	106	2	Liu, 2014
56	YS1			Changling graben	Rhyolitic welded tuff	LA-ICP-MS	105	2	Liu, 2014
57	Y1			Changling graben	Rhyolitic tuff	LA-ICP-MS	105	2	Hu, 2013
58	Y3			Changling graben	Rhyolitic tuff	LA-ICP-MS	107	6	Hu, 2013
59	SN180-1			Changling graben	Andesite	LA-ICP-MS	106	3	Hu, 2013
60	SN180-2			Changling graben	Andesite	LA-ICP-MS	116	2	Hu, 2013
61	SN102			Changling graben	Rhyolitic tuff	LA-ICP-MS	112	3	Hu, 2013
62	Y4			Changling graben	Granite porphyry	LA-ICP-MS	124	1	Hu, 2013
63	Y6			Changling graben	Trachyte	LA-ICP-MS	115	3	Hu, 2013
64	L1			Changling graben	Trachytic tuff	LA-ICP-MS	105	1	Hu, 2013
65	D2			Changling graben	Rhyolitie	LA-ICP-MS	105	3	Hu, 2013
66	Y5			Changling graben	Rhyolitie	LA-ICP-MS	104	3	Hu, 2013
67	LWY-1			Basin margin	Rhyolite	LA-ICP-MS	115		Shen, 2012
68	HSD			Basin margin	Andesite	LA-ICP-MS	114.7		Shen, 2012
69	XWY			Basin margin	Andesitic breccia	LA-ICP-MS	113.7		Shen, 2012
70	LWY-2			Basin margin	Rhyolite	LA-ICP-MS	110.7		Shen, 2012
71	WZ01	45.28	124.95	Xujiaweizi graben	Rhyolite	SHRIMP	114	2	Zhang et al., 2011
72	WZ03	45.22	124.9	Xujiaweizi graben	Rhyolite	SHRIMP	115	2	Zhang et al., 2011
73	WZ05	44.8	125	Xujiaweizi graben	Rhyolite	SHRIMP	112	2	Zhang et al., 2011
74	WZ09	45.21	125.05	Xujiaweizi graben	Andesite	SHRIMP	109	2	Zhang et al., 2011
75	W28	44.8	125	Xujiaweizi graben	Rhyolite	SHRIMP	115	2	Zhang et al., 2011
76	WZ30	44.8	125	Xujiaweizi graben	Rhyolite	SHRIMP	110	2	Zhang et al., 2011
77	DS1-1	46.4577	125.253	Xujiaweizi graben	Rhyolitic welded tuff	LA-ICP-MS	104.7	1.8	Huang et al., 2011
78	DS1-2	46.4577	125.253	Xujiaweizi graben	Rhyolitic welded tuff	SHRIMP	102.2	2.1	Huang et al., 2011
79	DS1-3	46.4577	125.253	Xujiaweizi graben	Andesite	LA-ICP-MS	105	3	Huang et al., 2011
80	Shengshen202-1	46.1539	125.328	Xujiaweizi graben	Rhyolite	LA-ICP-MS	103.7	1.1	Huang et al., 2011
81	Shengshen202-2	46.1539	125.328	Xujiaweizi graben	Rhyolite	LA-ICP-MS	106.5	2.5	Huang et al., 2011
82	Songshen2	46.2287	125.654	Xujiaweizi graben	Andesite	LA-ICP-MS	107.1	4.5	Huang et al., 2011
83	Xushen1-2-1	45.9115	125.591	Xujiaweizi graben	Tuffaceous rhyolite	LA-ICP-MS	105.3	1.1	Huang et al., 2011
84	Xushen1-2-2	45.9115	125.591	Xujiaweizi graben	Tuffaceous rhyolite	SHRIMP	106.9	2.7	Huang et al., 2011
85	Xushen1-2-3	45.9115	125.591	Xujiaweizi graben	Rhyolitic crystal tuff	LA-ICP-MS	103.5	3.3	Huang et al., 2011
86	Xushen4	45.9614	125.368	Xujiaweizi graben	Rhyolite	LA-ICP-MS	106.5	0.8	Huang et al., 2011
87	Suishen1-1	46.5802	127.007	Xujiaweizi graben	Andesite	LA-ICP-MS	105.4	2.4	Huang et al., 2011
88	Suishen1-2	46.5802	127.007	Xujiaweizi graben	Andesite	LA-ICP-MS	107.7	2	Huang et al., 2011
89	Suishen1-3	46.5802	127.007	Xujiaweizi graben	Andesitic breccia tuff	LA-ICP-MS	111.3	1.3	Huang et al., 2011
90	Suishen1-4	46.5802	127.007	Xujiaweizi graben	Andesitic breccia tuff	SHRIMP	114	3	Huang et al., 2011
91	Suishen1-5	46.5802	127.007	Xujiaweizi graben	Andesite	LA-ICP-MS	107.9	2.3	Huang et al., 2011
92	Ren11-1	46.6185	125.867	Xujiaweizi graben	Andesite	LA-ICP-MS	113.8	1.5	Huang et al., 2011
93	Ren11-2	46.6185	125.867	Xujiaweizi graben	Andesite	SHRIMP	112.1	3.5	Huang et al., 2011
94	Ren11-3	46.6185	125.867	Xujiaweizi graben	Andesite	LA-ICP-MS	109.4	1.5	Huang et al., 2011
95	Ren11-4	46.6185	125.867	Xujiaweizi graben	Andesite	SHRIMP	109.2	2.1	Huang et al., 2011
96	Du403	46.7786	123.426	Xujiaweizi graben	Andesite	LA-ICP-MS	101.4	1.9	Huang et al., 2011
97	LS3-1			Lindian-changjiaweizi graben	Andesite	LA-ICP-MS	118.7	4.2	Jin et al., 2011
98	LS3-2			Lindian-changjiaweizi graben	Andesite	LA-ICP-MS	120.2	1.8	Jin et al., 2011
99	LS3-3			Lindian-changjiaweizi graben	Andesite	LA-ICP-MS	114	10	Jin et al., 2011
100				Basin margin	Andesite	SHRIMP	110.6		Wang et al., 2010
101	D2			Changling graben	Rhyolite	LA-ICP-MS	105	0.7	Wu et al., 2010
102	Psc7			Basin margin	Rhyolite	SHRIMP	116	2	Zhang et al., 2009
103	Psc10			Basin margin	Rhyolite	SHRIMP	115.2	0.4	Zhang et al., 2009
104	Psc12			Basin margin	Rhyolite	SHRIMP	117	2	Zhang et al., 2009
105	PLT218			Basin margin	Rhyolite	SHRIMP	116	3	Zhang et al., 2009
106	PLT195			Basin margin	Basalt	SHRIMP	110	2	Zhang et al., 2009
107	XS9a			Xujiaweizi graben	Rhyolite	SHRIMP	112.1	1.3	Zhang et al., 2008
108	XS9b			Xujiaweizi graben	Dacite	SHRIMP	112.7	1.4	Zhang et al., 2008
109	X201a			Xujiaweizi graben	Felsite	SHRIMP	111.3	1.5	Zhang et al., 2008
110	XS601-4	46.0667	125.233	Xujiaweizi graben	Rhyolitic ignimibrite	SHRIMP	111.8	1.9	Ding et al., 2007
111	XS8-1	45.9083	125.217	Basin margin	Felsite	SHRIMP	111.1	0.9	Ding et al., 2007
112	XS201-1	45.9167	125.333	Basin margin	Rhyolitic tuff	SHRIMP	111.3	1.5	Ding et al., 2007
113	XS502-2	46	125.333	Basin margin	Rhyolitic ignimibrite	SHRIMP	115.1	1.2	Ding et al., 2007
114	SP2-1-10	46.2667	125.267	Basin margin	Rhyolite	SHRIMP	112.8	0.9	Ding et al., 2007
115	SP2-1-14	46.2667	125.267	Basin margin	Dacite	SHRIMP	113	0.8	Ding et al., 2007
116	SP202-4	46.1833	125.3	Basin margin	Rhyolite	SHRIMP	112	0.9	Ding et al., 2007
117	S202			Xujiaweizi graben	Rhyolite	SHRIMP	112	0.9	Zhang et al., 2007
118	X95			Xujiaweizi graben	Dacite	SHRIMP	112.7	1.6	Zhang et al., 2007
119	SK2-01			Xujiaweizi Garben	Andesite	LA-ICPMS	242	2	Yin et al., 2022, Doctoral Dissertation of Jilin University
120	SK2-02			Xujiaweizi Garben	Andesite	LA-ICPMS	246	6	Yin et al., 2022, Doctoral Dissertation of Jilin University
121	SK2-03			Xujiaweizi Garben	Trachyandesite	LA-ICPMS	243	2	Yin et al., 2022, Doctoral Dissertation of Jilin University
122	SK2-04			Xujiaweizi Garben	Volcanic breccia	LA-ICPMS	247	4	Yin et al., 2022, Doctoral Dissertation of Jilin University
123	FS4			Daqing Uplift	Granites	LA-ICPMS	242	2	Yin et al., 2022, Doctoral Dissertation of Jilin University
124	LS1			Changling Garebn	Dacite	LA-ICPMS	244	6	Yin et al., 2022, Doctoral Dissertation of Jilin University
125	SJ23			Daqing Uplift	Diorite	LA-ICPMS	243	2	Yin et al., 2022, Doctoral Dissertation of Jilin University
126	LT1			Daqing Uplift	Quartz Monzonite	LA-ICPMS	250	2	Yin et al., 2022, Doctoral Dissertation of Jilin University
127	LS3			Lishu Garben	Andesite	LA-ICPMS	245	2	Yin et al., 2022, Doctoral Dissertation of Jilin University
128	Dul-4				Granites		350	2	Wu et al., 2000, Chinese Science Bulletin
129	Ershen-1				Granites		165	3	Wu et al., 2000, Chinese Science Bulletin
130	Si-5			Southeastern Margin	Meta-diorite	SHRIMP	1839	7	Wang et al., 2006, Chinese Science Bulletin

## Sheet: Zhangguangcai Range (ZGR)
Order	Sample	GPS location		Pluton	Lithology	Method	Age (Ma)
							206Pb/238U or 207Pb/206Pb	Error	References
1	18SB-10a	45.6381	127.571	Min'antun	Granodiorite	LA-ICP-MS	323	2	Wang et al., 2021--Tectomophysics
2	18SB-33b	46.3026	127.482	Zhendongcun	Biotite-dolomite granite	LA-ICP-MS	232	2	Wang et al., 2021--Tectomophysics
3	18SB-13a	45.6486	127.674	Yujiatun	Syenogranite	LA-ICP-MS	185	1	Wang et al., 2021--Tectomophysics
4	18SB-31	46.2456	127.462	Guoyongfatun	Monzonitic granite	LA-ICP-MS	176	2	Wang et al., 2021--Tectomophysics
5	18SB-41	46.919	128.184	Tieli	Monzonitic granite	LA-ICP-MS	186	2	Wang et al., 2021--Tectomophysics
6	18SB-9	45.694	127.492	Taipingqiao	Monzonitic granite	LA-ICP-MS	177	2	Wang et al., 2021--Tectomophysics
7	18SB-23	46.1223	127.551	Zhaojiadian	Syenogranite	LA-ICP-MS	177	1	Wang et al., 2021--Tectomophysics
8	18SB-34	46.4654	127.415	Dengjiadian	Monzonitic granite	LA-ICP-MS	175	2	Wang et al., 2021--Tectomophysics
9	18SB-37	46.4971	127.7	Xi'ertun	Granodiorite	LA-ICP-MS	174	1	Wang et al., 2021--Tectomophysics
10	18SB-24	46.1942	127.561	Renhecun	Syenogranite	LA-ICP-MS	173	2	Wang et al., 2021--Tectomophysics
11	9718-1	43.8483	126.981	Tianqiaogang	Alkali feldspar granite	TIMS	190	2	Wu et al. (2002)
12	9728-1	43.8936	127.77	Sandaohe	Syenogranite	LA-ICPMS	216	3	Sun et al. (2005)
13	9757-4	46.0625	128.999	Maojiatun	Alkali feldspar granite	TIMS	212	2	Wu et al. (2002)
14	9766-1	46.9283	128.887	Langxiang	Granodiorite	LA-ICPMS	200	2	Wu et al. (2011)
15	9767-2	46.5181	128.831	Milin	Syenogranite	TIMS	197	2	Wu et al. (2002)
16	9773-1	46.7167	128.787	Tuanjie	Monzogranite	LA-ICPMS	201	3	Wu et al. (2011)
17	9777-1	46.9381	128.297	Shichang	Granodiorite	LA-ICPMS	175	2	Wu et al. (2011)
18	9780-2	48.2744	129.784	Qingshui	Alkali feldspar granite	LA-ICPMS	222	5	Sun et al. (2004)
19	P40-1	47.5911	129.24	Taiqing	Monzonite	LA-ICPMS	210	2	Wu et al. (2011)
20	97SW001	45.2039	127.804	Yimianpo	Syenogranite	SHRIMP	180	3	Wu et al. (2011)
21	97SW005	45.0847	128.126	Yimianpo	Granodiorite	SHRIMP	183	4	Wu et al. (2011)
22	97SW008	44.9303	128.911	Yimianpo	Felsic dyke	SHRIMP	147	10	Wu et al. (2011)
23	97SW009	44.9303	128.911	Hufeng	Monzogranite	SHRIMP	179	7	Wu et al. (2011)
24	98SW101	45.7906	128.504	Yanshou	Syenogranite	SHRIMP	199	5	Wu et al. (2011)
25	98SW103	45.7975	128.506	Yanshou	Granodiorite	SHRIMP	191	4	Wu et al. (2011)
26	98SW104	45.7975	128.506	Yanshou	Felsic dyke	SHRIMP	147	6	Wu et al. (2011)
27	98SW122	43.5753	127.573	Baishishan	Granodiorite	SHRIMP	190	2	Wu et al. (2011)
28	98SW124	43.9694	126.729	Jiangmifeng	Granodiorite	SHRIMP	173	4	Wu et al. (2011)
29	98SW125	43.8989	126.917	Tiangang	Monzogranite	SHRIMP	175	3	Wu et al. (2011)
30	98SW126	43.8989	126.917	Tiangang	Dioritic enclave	SHRIMP	175	4	Wu et al. (2011)
31	00SW225	47.6972	128.967	Hongqi	Granodiorite	SHRIMP	198	4	Wu et al. (2011)
32	00SW231	47.4042	129.41	Dafeng	Monzogranite	SHRIMP	201	4	Wu et al. (2011)
33	DY0380-1	47.4561	129.244	Xiaoxilin	Granodiorite	LA-ICPMS	200	3	Wu et al. (2011)
34	DY0381-3	47.3778	129.139	Xiaoxilin	Granodiorite	LA-ICPMS	447	4	Wu et al. (2011)
35	DY0385-1	47.6467	129.049	Chaoxiantun	Alkali feldspar granite	LA-ICPMS	176	2	Wu et al. (2011)
36	DY0386-5	47.6394	129.142	Chaoxiantun	Syenogranite	LA-ICPMS	475	8	Wu et al. (2011)
37	DY0387-6	47.0311	128.568	Jiling	Granodiorite	LA-ICPMS	492	8	Wu et al. (2011)
38	DY0519-1	44.0383	128.664	Weicaohe	Monzogranite	LA-ICPMS	266	1	Wu et al. (2011)
39	DY0528-1	44.1953	128.844	Xiaobeihu	Monzogranite	LA-ICPMS	497	2	Wu et al. (2011)
40	DY0535-1	44.5042	129.255	Shihecun	Syenogranite	LA-ICPMS	192	1	Wu et al. (2011)
41	DY0540-1	44.5258	128.805	Fahecun	Syenogranite	LA-ICPMS	196	1	Wu et al. (2011)
42	DY0545-1	44.3903	129.061	Jiujiecun	Syenogranite	LA-ICPMS	185	2	Wu et al. (2011)
43	DY0556-1	45.3842	127.696	Jijiadian	Syenogranite	LA-ICPMS	190	1	Wu et al. (2011)
44	DY0559-1	45.5047	128.284	Xincuntun	Monzogranite	LA-ICPMS	332	1	Wu et al. (2011)
45	DY103-2	44.4336	126.775	Liangjiashan	Alkali feldspar granite	LA-ICPMS	191	2	Wu et al. (2011)
46	DY104-2	44.3383	126.887	Shulan	Granodiorite	LA-ICPMS	190	2	Wu et al. (2011)
47	DY105-2	44.2408	126.908	Xiangshui	Monzogranite	LA-ICPMS	172	3	Wu et al. (2011)
48	DY118-1	43.085	126.751	Baishishan	Granodiorite	LA-ICPMS	182	2	Wu et al. (2011)
49	DY144-1	43.8544	126.525	Beishan	Syenogranite	LA-ICPMS	166	2	Wu et al. (2011)
50	FW02-184	43.5728	127.575	Baishishan	Granodiorite	LA-ICPMS	181	2	Wu et al. (2011)
51	FW02-188	43.6469	127.748	Baishishan	Granodiorite	LA-ICPMS	187	4	Wu et al. (2011)
52	MG-7	43.8483	126.981	Tianqiaogang	Alkali feldspar granite	SHRIMP	182	3	Sun et al. (2005)
53	SLS01-1	44.3889	126.282	Silengshan	Alkali feldspar granite	TIMS	314	5	Wu et al. (2011)
54	P4-5	43.26	127.385	Piaohechuan	Pyroxenite	SHRIMP	217	3	Wu et al. (2004b)
55	X-4			Xinhuatun	Granodiorite	SHRIMP	184	4	Wu et al. (2000)
56	Ycz-2	44.1433	128.891	Yingchengzi	Alkali feldspar granite	LA-ICPMS	477	6	Chen et al. (2009)
57	YC113	48.4947	129.52	Tangwanghe	Alkali feldspar granite	LA-ICPMS	471	3	Liu et al. (2008)
58	YC127	46.9269	128.677	Jiling	Granodiorite	LA-ICPMS	499	1	Liu et al. (2008)
59	JMS136	47.2094	129.972	Dongfengshan	Quartz monzonite	SHRIMP	508	15	Liu et al. (2008)
60	15YL14–1	47.6	128.5	Yichun	Granite	LA-ICPMS	182.8	1.3	Zhu et al., 2017--Lithosphere
61	15YL28–1	47.35	129.533	Yichun	Granite	LA-ICPMS	185	0.62	Zhu et al., 2017--Lithosphere
62	15YL18–4			Yichun	Quartz diorite	LA-ICPMS	182.7	1.1	Zhu et al., 2017--Lithosphere
63	15YL10–1	45.6833	127.483	The central part of the area	Granodiorite	LA-ICPMS	185.54	0.92	Zhu et al., 2017--Lithosphere
64	15YL12–4	45.65	127.35	The central part of the area	Granite	LA-ICPMS	184.19	0.77	Zhu et al., 2017--Lithosphere
65	15YL38–1			Jilin area	Granodiorite	LA-ICPMS	163	1.2	Zhu et al., 2017--Lithosphere
66	15YL36–5	43.8833	126.917	Jilin area	Monzogranite	LA-ICPMS	191.4	1.2	Zhu et al., 2017--Lithosphere
67	15YL40–1	43.8167	126.717	Jilin area	Monzogranite	LA-ICPMS	191	1.2	Zhu et al., 2017--Lithosphere
68	H15-61-5	45.3908	127.228		Monzogranite	LA-ICPMS	179	3	Ge et al., 2017--Tectomophysics
69	H15-66-1	45.3886	127.687		Monzogranite	LA-ICPMS	180	1	Ge et al., 2017--Tectomophysics
70	H15-68-1	45.3242	127.842		Granodiorite	LA-ICPMS	174	1	Ge et al., 2017--Tectomophysics
71	H15-69-1	45.1328	128.422		Granodiorite	LA-ICPMS	189	1	Ge et al., 2017--Tectomophysics
72	H15-70-1	45.1328	128.423		Syenogranite	LA-ICPMS	200	1	Ge et al., 2017--Tectomophysics
73	H15-71-1	45.0764	128.5		Monzogranite	LA-ICPMS	198	2	Ge et al., 2017--Tectomophysics
74	H15-72-1	44.8597	128.694		Monzogranite	LA-ICPMS	193	1	Ge et al., 2017--Tectomophysics
75	H15-10-01	46.9181	128.185			LA-ICPMS	190	2	Ge et al., 2019--Lithosphere
76	H15-55-01	46.2017	128.653			LA-ICPMS	196	1	Ge et al., 2019--Lithosphere
77	H15-56-01	46.2672	128.536			LA-ICPMS	196	1	Ge et al., 2019--Lithosphere
78	H15-57-01	46.4231	128.526			LA-ICPMS	186	1	Ge et al., 2019--Lithosphere
79	H15-58-01	46.4417	128.537			LA-ICPMS	181	1	Ge et al., 2019--Lithosphere
80	H15-59-01	46.5617	128.677			LA-ICPMS	182	1	Ge et al., 2019--Lithosphere
81	H15-08-01	46.9181	128.185			LA-ICPMS	181	1	Ge et al., 2017--Lithos
82	H15-11-01	46.9247	128.345			LA-ICPMS	178	2	Ge et al., 2017--Lithos
83	H15-14-01	46.9642	128.705			LA-ICPMS	191	1	Ge et al., 2017--Lithos
84	H15-16-01	47.0469	129.105			LA-ICPMS	195	2	Ge et al., 2017--Lithos
85	H15-34-01	47.3858	129.492			LA-ICPMS	210	1	Ge et al., 2017--Lithos
86	H15-35-01	47.3917	129.625			LA-ICPMS	220	1	Ge et al., 2017--Lithos
87	H15-37-01	47.4086	129.793			LA-ICPMS	251	1	Ge et al., 2017--Lithos
88	H15-38-01	47.3994	129.907			LA-ICPMS	242	2	Ge et al., 2017--Lithos
89	H15-39-01	47.3833	129.983			LA-ICPMS	246	1	Ge et al., 2017--Lithos
90	H15-40-01	47.3833	129.983			LA-ICPMS	241	1	Ge et al., 2017--Lithos
91	18SB-12a	45.5994	127.619	Banzifangtun	Welded tuff	LA-ICPMS	177	2	Wang et al. (2021)
92	18SB-12b	45.5994	127.619	Banzifangtun	Porphyrite	LA-ICPMS	178	1	Wang et al. (2021)
93	18SB-29	46.1461	127.727	Wangjiatun	Welded tuff	LA-ICPMS	190	1	Wang et al. (2021)
94	18SB-26	46.1542	127.704	Wangjiatun	Rhyolite	LA-ICPMS	175	2	Wang et al. (2021)
95	18SB-14a	45.6855	127.718	Liujiatun	Welded tuff	LA-ICPMS	181	1	Wang et al. (2021)
96	18SB-13b	45.6486	127.674	Yujiatun	Tuff	LA-ICPMS	182	2	Wang et al. (2021)
97	HDL1-1	45.7322	129.289	Dongfenglinchang	Meta-basalt	LA-ICPMS	209	3	Xu et al. (2013)
98	HDL1-2	45.7322	129.289	Dongfenglinchang	Rhyolite	LA-ICPMS	214	3	Xu et al. (2013)
99	HDY16-1	45.0817	129.263	Xinxinglinchang	Basaltic andesite	LA-ICPMS	211	2	Xu et al. (2013)
100	HDY21-1	45.0817	129.271	Xinxinglinchang	Meta-andesite	LA-ICPMS	218	1	Xu et al. (2013)
101	HB38-1	45.425	127.889	Heilonggong town	Basaltic andesite	LA-ICPMS	173	3	Xu et al. (2013)
102	HB37-1	45.3783	128.408	Qinglongtun, Yanshou	Andesite	LA-ICPMS	228	2	Xu et al. (2013)
103	HB13-1	45.5686	127.138	Hongxing reservoir	Basalt	LA-ICPMS	174	2	Xu et al. (2013)
104	HB10-1	45.7069	127.326	Sandaogang	Rhyolite	LA-ICPMS	175	1	Xu et al. (2013)
105	HYC13-1	45.5631	128.401	Shashilu	Rhyolite	LA-ICPMS	185	1	Xu et al. (2013)
106	HB28-1	45.5389	127.793	Wangjiaguanzi	Dacite	LA-ICPMS	190	1	Xu et al. (2013)
107	HYC2-1	47.9436	128.899	Qingshan	Rhyolite	LA-ICPMS	187	2	Xu et al. (2013)
108	HB4-1	45.5861	127.696	Shisanhucun	Rhyolite	LA-ICPMS	190	1	Xu et al. (2013)
109	HYL2-1	46.1986	127.658	Bayan, eastern Haerbin	Trachyandesite	LA-ICPMS	179	2	Xu et al. (2013)
110	HYL3-1	46.1986	127.658	Bayan, eastern Haerbin	Rhyolite	LA-ICPMS	184	2	Xu et al. (2013)
111	HTW4-1	48.7358	129.335	Northeastern Yichun city	Andesite	LA-ICPMS	108	1	Xu et al. (2013)
112	HYC1-1	47.9436	128.899	Qingshan	Rhyolite	LA-ICPMS	102	1	Xu et al. (2013)

## Sheet: Lesser Xing'an Range (LXR)
Order	Sample	GPS location		Pluton	Lithology	Method	Age (Ma)
							206Pb/238U or 207Pb/206Pb	Error	References
1	9806-3	49.975	125.414	Guguhe	Syenogranite	TIMS	264	5	Wu et al. (2002)
2	9832-2	50.3583	127.304	Shangmachang	Syenogranite	TIMS	106	2	Wu et al. (2002)
3	9843-1	50.2347	126.469	Daheishan	Syenogranite	TIMS	292	4	Wu et al. (2002)
4	9849-1	49.5556	126.833	Songmushan	Syenogranite	TIMS	260	3	Wu et al. (2002)
5	FW04-403	49.5614	123.762	Longtou	Monzogranite	LA-ICPMS	129	2	Wu et al. (2011)
6	FW04-412	49.5931	124.072	Yili	Granodiorite	LA-ICPMS	142	1	Wu et al. (2011)
7	GW04523	50.2467	125.787	Duobaoshan	Granodiorite	LA-ICPMS	485	8	Ge et al. (2007b)
8	GW05004	48.5286	124.457	Baoshan	Granodiorite	LA-ICPMS	160	1	Wu et al. (2011)
9	GW05007	48.58	124.473	Baoshan	Monzogranite	LA-ICPMS	301	2	Wu et al. (2011)
10	GW05129	50.8947	127.083	Baishilazi	Granodiorite	LA-ICPMS	170	2	Sui et al. (2007)
11	2002DL-21-32	49.5211	126.644	Daling	Gabbro	SHRIMP	483	4	Miao (2003)
12	2002NJ-2	49.3567	125.407		Monzogranite	SHRIMP	292	6	Miao et al. (2004)
13	2002NJ-7	49.2542	125.669		Gneiss	SHRIMP	333	7	Miao et al. (2004)
14	2002XKL-2	50.2247	126.908		Granodiorite	SHRIMP	164	4	Miao (2003)
15	2002XKL-7	50.2569	126.796		Granodiorite	SHRIMP	167	4	Miao et al. (2004)
16							478.9	2.8	Guo et al. (2019)
17							498.7	1.7	Guo et al. (2019)
18							175	1	Xu et al. (2013)
19							183	2	Xu et al. (2013)
20							176	1	Xu et al. (2013)
21							185	2	Xu et al. (2013)
22							171.1	1.3	Zhao et al.(2017)
23							173.9	3.9	Zhao et al.(2017)
24							178.3	1.5	Zhao et al.(2017)
25							169.1	6.2	Zhao et al.(2017)
26	HTW1-1	48.54	129.214			LA-ICPMS	185	1	Yu et al., 2012, Lithos
27	HTW6-1	48.4931	129.423			LA-ICPMS	186	2	Yu et al., 2012, Lithos
28	HYC10-1	47.7102	128.39			LA-ICPMS	182	2	Yu et al., 2012, Lithos
29	HWC1-1	45.1414	127.234			LA-ICPMS	183	1	Yu et al., 2012, Lithos
30	HYL1-1	46.3483	128.019			LA-ICPMS	186	2	Yu et al., 2012, Lithos
31							505	2	Wang et al., 2016, Lithos
32							544	6	Wang et al., 2016, Lithos
33							468	3	Wang et al., 2016, Lithos
34							516	5	Wang et al., 2016, Lithos
35							493	4	Wang et al., 2016, Lithos
36							457	2	Wang et al., 2016, Lithos
37							486	4	Wang et al., 2016, Lithos
38							464	4	Wang et al., 2016, Lithos
39							476	3	Wang et al., 2016, Lithos
40							470	4	Wang et al., 2016, Lithos
41							475	4	Wang et al., 2016, Lithos
42							460	2	Wang et al., 2016, Lithos
43							458	2	Wang et al., 2016, Lithos
44							496	3	Wang et al., 2016, Lithos
45							551	7	Wang et al., 2016, Lithos
46							491	3	Wang et al., 2016, Lithos
47							491	2	Wang et al., 2016, Lithos
48							488	2	Wang et al., 2016, Lithos
49							515	5	Wang et al., 2016, Lithos
50							536	8	Wang et al., 2016, Lithos
51							486	5	Wang et al., 2016, Lithos
52							514	3	Wang et al., 2016, Lithos
53							550	5	Wang et al., 2016, Lithos
54							488	3	Wang et al., 2016, Lithos
55							506	6	Wang et al., 2016, Lithos
56							470	3	Wang et al., 2016, Lithos
57							492	6	Wang et al., 2016, Lithos
58							513	5	Wang et al., 2016, Lithos
59							469	2	Wang et al., 2016, Lithos
60							471	2	Wang et al., 2016, Lithos
61							496	6	Wang et al., 2016, Lithos
62							472	2	Wang et al., 2016, Lithos
63							503	4	Wang et al., 2016, Lithos
64							472	2	Wang et al., 2016, Lithos
65							495	5	Wang et al., 2016, Lithos
66							450	2	Wang et al., 2016, Lithos
67							472	3	Wang et al., 2016, Lithos
68		48.4833	128.742				501.9	1.6	Fei et al., 2018, Lithos
69		48.4833	128.742				501	2.4	Fei et al., 2018, Lithos
70		48.4833	128.742				196.5	2.6	Fei et al., 2018, Lithos
71		48.4833	128.742				197.2	1.3	Fei et al., 2018, Lithos
72		48.4833	128.742				196.3	1.6	Fei et al., 2018, Lithos
73		48.4833	128.742				193.7	2.6	Fei et al., 2018, Lithos
74		48.4833	128.742				195.8	1.6	Fei et al., 2018, Lithos
75		48.4833	128.742				191.2	7.5	Fei et al., 2018, Lithos
76		49.5	129				252.5	0.7	Ren et al., 2017, OGR
77		49.5	129				251.1	0.98	Ren et al., 2017, OGR
78		47.8689	128.546				180.7	1.6	Hu et al., 2014, JAES
79		47.2917	128.433				181.2	1.1	Hu et al., 2014, JAES
80		47.2917	128.433				179.9	1	Hu et al., 2014, JAES
81							246	1	Fu et al., 2021, Geological Bulletin of China

## Sheet: Liaodong-Jiamusi (LDP JR)
Order	Sample	GPS location		Pluton	Lithology	Method	Age (Ma)		References
							206Pb/238U or 207Pb/206Pb	Error
	Liaoyuan
1	GW04530	43.4906	126.327	Daheishan	Granodiorite	LA-ICPMS	170	3	Ge et al. (2007b)
2	GW04542	43.5003	126.309	Daheishan	Monzogranite	LA-ICPMS	178	3	Ge et al. (2007b)
3	Baishi-1	43.4806	126.09	Baishileizi	Alkali feldspar granite	TIMS	123	3	Wu et al. (2002)
4	99SW109	42.8978	126.423	Hongqiling	Leucogabbro	SHRIMP	216	5	Wu et al. (2004b)
5	HP2-2	43.3461	126.022	Qingyangwaizi	Gabbro	TIMS	129	1	Wu et al., (2011)
6	HP4-1	43.3603	126.017	Qingyangwaizi	Monzogranite	TIMS	124	4	Wu et al., (2011)
7	HP4-1	43.3603	126.017	Qingyangwaizi	Monzogranite	LA-ICPMS	119	2	Wu et al., (2011)
8	97103-1	43.1014	126.331	Yima	Granodiorite	LA-ICPMS	170	1	Wu et al., (2011)
9	9902-2	43.3681	124.808	Daduanshugou	Monzogranite	LA-ICPMS	176	3	Wu et al., (2011)
10	9903-1	43.3306	124.783	Shichangtun	Granodiorite	TIMS	184	2	Wu et al., (2011)
11	9905-1	42.9989	124.789	Tiande	Monzogranite	LA-ICPMS	162	3	Wu et al., (2011)
12	9909-4	42.9542	125.358	Xiangshuiyuanzi	Gt-Mus monzogranite	TIMS	184	3	Wu et al., (2011)
13	9923-1	43.1319	126.468	Dayushan	Granodiorite	TIMS	248	4	Wu et al., (2011)
14	DY020-1	43.2917	125.287	Quanyangou	Gt-Mus monzogranite	LA-ICPMS	178	4	Wu et al., (2011)
15	DY018-1	43.3931	126.175	Quchaihe	Monzogranite	LA-ICPMS	177	2	Wu et al., (2011)
16	DY023-2	43.2467	125.278	Qingniushan	Syenogranite	LA-ICPMS	178	2	Wu et al., (2011)
17	DY036-6	42.4058	124.473	Dasanjiazi	Diorite	LA-ICPMS	178	3	Wu et al., (2011)
18	DY0502-1	42.7094	126.1	Xujiajie	Syenogranite	LA-ICPMS	108	1	Wu et al., (2011)
19	DY0504-2	42.7556	126.456	Zhiancun	Syenogranite	LA-ICPMS	182	3	Wu et al., (2011)
20	DY0506-1	42.7906	126.529	Xingnongcun	Syenogranite	LA-ICPMS	185	2	Wu et al., (2011)
21	DY0509-5	42.9883	126.587	Liushuhe	Diorite	LA-ICPMS	182	1	Wu et al., (2011)
22	DY051-1	42.4675	125.433	Tuanshanzi	Granodiorite	LA-ICPMS	175	2	Wu et al., (2011)
23	DY053-2	42.46	125.494	Hudingzi	Granodiorite	LA-ICPMS	167	3	Wu et al., (2011)
24	DY081-1	43.3561	124.76	Shichangtun	Quartz diorite	TIMS	184	2	Wu et al., (2011)
25	DY123-4	43.1111	125.958	Dahongshilazi	Alkali feldspar granite	LA-ICPMS	251	2	Wu et al., (2011)
26	DY124-2	43.0992	125.848	Dahongshilazi	Alkali feldspar granite	LA-ICPMS	260	3	Wu et al., (2011)
27	DY126-2	42.9072	125.841	Qingyang	Syenogranite	LA-ICPMS	259	3	Wu et al., (2011)
28	DY141-1	43.17	125.133	Zumin	Monzogranite	LA-ICPMS	163	1	Wu et al., (2011)
29	DY143-2	43.0419	125.106	Anyi	Monzogranite	LA-ICPMS	252	2	Wu et al., (2011)
30	FW00-121	42.9697	125.863	Dakangshan	Quartz syenite	SHRIMP	264	5	Wu et al., (2011)
31	FW00-121	42.9697	125.863	Dakangshan	Quartz syenite	TIMS	267	1	Wu et al., (2011)
32	MG-12	42.9292	125.204	Renao	Monzogranite	SHRIMP	171	6	Wu et al., (2011)
33	MG-13	42.9944	124.803	Tiande	Monzogranite	SHRIMP	158	3	Wu et al., (2011)
34	MG-15	42.6008	124.616	Fangmu	Quartz diorite	SHRIMP	175	6	Wu et al., (2011)
35	MG-16	42.6094	124.559	Liushugou	Granodiorite	SHRIMP	158	4	Wu et al., (2011)
36	MG-21	42.4058	124.473	Dasanjiazi	Diorite	SHRIMP	174	3	Wu et al., (2011)
37	MG-28	42.3719	124.929	Songshuzui	Granodiorite	SHRIMP	243	5	Wu et al., (2011)
38	MG-32	42.5128	124.803	Helong	Monzogranite	SHRIMP	163	4	Wu et al., (2011)
39	MG-36	42.3461	125.076	Tukouzi	Granodiorite	SHRIMP	163	7	Wu et al., (2011)
40	MG-38	42.4892	125.522	Hudingzi	Monzogranite	SHRIMP	165	9	Wu et al., (2011)
41	MG-40	42.4333	125.554	Heishantou	Monzogranite	SHRIMP	163	4	Wu et al., (2011)
42	MG-42	42.7233	125.828	Loushan	Alkali feldspar granite	SHRIMP	125	4	Wu et al., (2011)
43	MG-64	42.5478	125.187	Xiaosiping	Monzogranite	SHRIMP	242	7	Wu et al., (2011)
44	MG-103	42.4197	124.679	Jianshanzi	Granodiorite	SHRIMP	243	5	Wu et al., (2011)
45	MG-108	42.4036	124.659	Jianshanzi	Granodiorite	SHRIMP	163	2	Wu et al., (2011)
46	MG-109	42.3425	124.761	Lazishan	Quartz monzodiorite	SHRIMP	123	2	Wu et al., (2011)
47	MG-110	42.3425	124.761	Lazishan	Alkali feldspar granite	SHRIMP	127	3	Wu et al., (2011)
48	MG-119	42.2967	124.759	Jianshanzi	Monzogranite	SHRIMP	254	8	Wu et al., (2011)
49	MG-139	42.3319	124.915	Tukouzi	Granodiorite	SHRIMP	163	4	Wu et al., (2011)
50	MG-142	42.1719	124.869	Hongshilazi	2-mica monzogranite	SHRIMP	172	3	Wu et al., (2011)
51	MG-143	42.2694	124.781	Fangniugou	Gt-Mus monzogranite	SHRIMP	261	20	Wu et al., (2011)
52	MG-182	42.4231	124.538	Erlingba	Quartz diorite	SHRIMP	169	3	Wu et al., (2011)
53	SCS01-1	42.9903	126.142	Shancheshan	Granodiorite	LA-ICPMS	175	3	Wu et al., (2011)
54	CH11	43.6297	125.608	Wuxing	Monzogranite	LA-ICPMS	162	2	Xu et al. (2008)
55	X13	43.6014	125.604	Wuxing	Syenogranite	LA-ICPMS	159	3	Xu et al. (2008)
56	FK51	42.5036	123.431	Faku	Granodiorite	SHRIMP	284	3	Zhang et al. (2005)
57	FK53	42.4969	123.263	Faku	Granodiorite	SHRIMP	265	4	Zhang et al. (2005)
58	FK04-5	42.4961	123.492	Faku	Gabbro	SHRIMP	241	6	Zhang et al. (2009)
	Yanbian-Shuifenhe
59	FW00-34	43.1458	127.896	Liukesong	Diorite	SHRIMP	247	1	Wu et al., 2011
60	FW00-37	42.8669	128.042	Huangniling	Monzogranite	TIMS	168	3	Zhang et al., 2004
61	FW00-40	42.92	127.636	Huangniling	Granodiorite	SHRIMP	171	5	Zhang et al., 2004
62	FW00-43	42.7972	127.881	Huangniling	Monzogranite	TIMS	158	3	Wu et al., 2011
63	FW00-45	42.9053	128.389	Xiaobutun	Quartz Diorite	LA-ICPMS	260	2	Wu et al., 2011
64	FW00-50	43.0744	128.554	Qinglinzi	Syenite	TIMS	223	1	Wu et al., 2011
65	FW00-50	43.0744	128.554	Qinglinzi	Syenite	LA-ICPMS	229	3	Wu et al., 2011
66	FW00-54	43.0419	128.991	Shimen	Granodiorite	TIMS	182	2	Wu et al., 2011
67	FW00-56	42.9839	129.105	Yushuchuan	Monzogranite	TIMS	186	1	Wu et al., 2011
68	FW00-58	43.0328	129.664	Miantian	Granodiorite	TIMS	189	1	Wu et al., 2011
69	FW00-66	43.0844	130.728	Sandaogou	Monzogranite	TIMS	205	1	Wu et al., 2011
70	FW00-73	43.8917	130.966	Naozhi	Monzogranite	LA-ICPMS	196	3	Wu et al., 2011
71	FW00-78	43.6228	130.629	Qishiergedingzi	Monzogranite	TIMS	206	4	Wu et al., 2011
72	FW00-78	43.6228	130.629	Qishiergedingzi	Monzogranite	TIMS	203	2	Wu et al., 2011
73	FW00-81	43.6467	130.497	Qishiergedingzi	Quartz Diorite	TIMS	199	8	Wu et al., 2011
74	FW00-81	43.6467	130.497	Qishiergedingzi	Quartz Diorite	TIMS	200	1	Wu et al., 2011
75	FW00-86	43.7039	129.426	Chunyang	Monzogranite	TIMS	215	5	Wu et al., 2011
76	FW00-88	43.6361	129.531	Luotuoshan	Monzogranite	LA-ICPMS	190	2	Wu et al., 2011
77	FW00-91	43.4308	129.654	Daxingou	Granodiorite	TIMS	187	1	Wu et al., 2011
78	FW00-96	43.1458	129.539	Zongping	Py Diorite	TIMS	129	2	Wu et al., 2011
79	FW00-104	43.025	129.473	Shiren	Alkali Feldspar Granite	LA-ICPMS	253	2	Wu et al., 2011
80	FW00-110	43.1258	128.851	Liangbing	Monzogranite	TIMS	247	1	Wu et al., 2011
81	FW00-116	42.9775	130.63	Dahuanggou	Diorite	TIMS	201	10	Wu et al., 2011
82	FW00-120	43.0522	130.652	Dahuanggou	Granodiorite	TIMS	203	2	Wu et al., 2011
83	FW00-122	43.3	128.947	Xibeicha	Monzogranite	LA-ICPMS	240	2	Wu et al., 2011
84	FW02-191	43.1119	128.015	Erhedian	Alkali	feldspar	253	2	Wu et al., 2011
85	FW02-193	43.4144	128.407	Changlecun	Monzogranite	LA-ICPMS	179	1	Wu et al., 2011
86	FW02-194	43.4461	128.454	Liushuhe	Quartz Diorite	LA-ICPMS	253	2	Wu et al., 2011
87	FW02-197	43.0153	128.828	Shimen	Granodiorite	LA-ICPMS	183	4	Wu et al., 2011
88	YB03-22	44.5806	131.052	Wuhuashan	Granodiorite	LA-ICPMS	207	2	Wu et al., 2011
89	YB03-35	44.5414	131.123	Wuhuashan	Granodiorite	LA-ICPMS	203	3	Wu et al., 2011
90	YB03-40	44.4553	130.826	Taipingling	Tonalite	LA-ICPMS	203	3	Wu et al., 2011
91	YB03-50	44.6011	130.82	Xidagangzi	Rhyolite	LA-ICPMS	203	2	Wu et al., 2011
92	YB03-54	44.5928	130.612	Hongfangzi	Monzogranite	LA-ICPMS	206	3	Wu et al., 2011
93	YB03-58	44.5558	130.555	Taipingling	Granodiorite	LA-ICPMS	202	2	Wu et al., 2011
94	YB03-64	44.3017	131.006	Badaoqiao	Granodiorite	LA-ICPMS	193	3	Wu et al., 2011
95	YB03-66	44.2828	131.063	Badaoqiao	Monzogranite	LA-ICPMS	205	3	Wu et al., 2011
96	YB03-70	44.1078	130.762	Daxushan	Rhyolite	LA-ICPMS	213	3	Wu et al., 2011
97	YB03-77	44.1469	130.748	Shahezi	Syenogranite	LA-ICPMS	216	4	Wu et al., 2011
98	YB03-81	44.1758	130.742	Shahezi	Granodiorite	LA-ICPMS	197	4	Wu et al., 2011
99	YB03-94	44.0733	130.571	Xidahe	Granodiorite	LA-ICPMS	195	2	Wu et al., 2011
100	YB03-108	44.2875	130.832	Ziyang	Monzogranite	LA-ICPMS	209	3	Wu et al., 2011
101	YB03-113	44.4325	130.764	Taipingling	Monzogranite	LA-ICPMS	205	5	Wu et al., 2011
102	YB03-122	44.3925	130.681	Taipingling	Tonalite	LA-ICPMS	205	2	Wu et al., 2011
103	YB03-127	44.3872	130.521	Jiguanlazi	Monzogranite	LA-ICPMS	227	4	Wu et al., 2011
104	YB03-168	44.1958	130.344	Taipingling	Granodiorite	LA-ICPMS	204	2	Wu et al., 2011
105	YB03-176	43.8264	129.366	Laosongling	Monzogranite	LA-ICPMS	197	2	Wu et al., 2011
106	YB03-184	43.6975	129.374	Chunyang	Syenogranite	LA-ICPMS	203	2	Wu et al., 2011
107	YB03-185	43.6703	129.28	Nangoutun	Porphyritic Granite	LA-ICPMS	203	3	Wu et al., 2011
108	YB03-188	43.5081	129.408	Hongshitun	Monzogranite	LA-ICPMS	266	3	Wu et al., 2011
109	YB03-201	43.7181	129.737	Erchazigou	Syenogranite	LA-ICPMS	218	2	Wu et al., 2011
110	YB03-213	43.9417	129.876	Xiangshuihezi	Granodiorite	LA-ICPMS	180	3	Wu et al., 2011
111	YB03-214	43.8333	129.998	Xiangshuihezi	Granodiorite	LA-ICPMS	187	2	Wu et al., 2011
112	YB03-222	43.7447	130.12	Xidahe	Granodiorite	LA-ICPMS	195	3	Wu et al., 2011
113	YB03-238	43.6619	130.148	Xidahe	Diorite	LA-ICPMS	257	5	Wu et al., 2011
114	YB03-245	43.5964	130.02	Dadingzi	Syenogranite	LA-ICPMS	200	3	Wu et al., 2011
115	YB03-250	43.5986	129.941	Dadingzi	Granodiorite	LA-ICPMS	189	3	Wu et al., 2011
116	YB03-253	43.5803	129.902	Dadingzi	Tonalite	LA-ICPMS	277	3	Wu et al., 2011
117	YZ02-1	42.9583	128.422	Liangbing	Alkali Feldspar Granite	LA-ICPMS	190	2	Wu et al., 2011
118	YZ02-4	42.9603	128.526	Xinhe	Gt Monzogranite	LA-ICPMS	179	2	Wu et al., 2011
119	FW00-40	42.92	127.636	Huangniling, Yanbian	Granodiorite	SHRIMP	171	5	Zhang et al., 2004
120	YZ02-16-1	42.3661	128.661	Bailiping, Yanbian	Syenogranite	LA-ICP-MS	187	3	Zhang et al., 2004
121	YZ02-5	42.9136	128.722	Mengshan, Yanbian	Monzogranite	LA-ICP-MS	174	3	Zhang et al., 2004
122	YZ02-33	42.4647	129.256	Gaoling, Yanbian	Granodiorite	LA-ICP-MS	170	3	Zhang et al., 2004
123	FW00-37	42.8669	128.042	Huangniling, Yanbian	Monzogranite	TIMS	168	3	Zhang et al., 2004
124	YZ02-45	42.6211	129.2	Gaoling, Yanbian	Monzogranite	LA-ICP-MS	192	2	Zhang et al., 2004
125	YZ02-10	42.8328	128.894	Mengshan, Yanbian	Granodiorite	LA-ICP-MS	184	2	Zhang et al., 2004
126	YZ02-7	42.9322	128.708	Mengshan, Yanbian	Granodiorite	LA-ICP-MS	181	2	Zhang et al., 2004
127	YZ02-28	42.0719	128.904	Bailiping, Yanbian	Diorite	LA-ICP-MS	178	2	Zhang et al., 2004
128	YZ02-18-3	42.3389	128.838	Bailiping, Yanbian	Granodiorite	LA-ICP-MS	119	2	Zhang et al., 2004
129	YZ02-21-1	42.2261	128.799	Bailiping, Yanbian	Quartz Diorite	LA-ICP-MS	116	1	Zhang et al., 2004
130	YZ02-38	42.3089	129.036	Liudong	Monzogranite	LA-ICPMS	114	2	Wu et al., 2011
131	YZ02-40	42.1847	129.156	Liudong	Granodiorite	LA-ICPMS	246	3	Wu et al., 2011
132	YZ02-43	42.2344	129.178	Liudong	Quartz Diorite	LA-ICPMS	220	2	Wu et al., 2011
133	YZ02-45	42.6211	129.2	Gaoling	Monzogranite	LA-ICPMS	192	2	Wu et al., 2011
134	YZ02-49	42.6608	129.5	Longyandong	Quartzdiorite	LA-ICPMS	251	2	Wu et al., 2011
135	YZ02-50	42.5764	129.618	Tianfozhishan	Monzogranite	LA-ICPMS	196	7	Wu et al., 2011
136	YZ02-52	42.4614	129.62	Dadong	Granodiorite	LA-ICPMS	190	3	Wu et al., 2011
137	07YB04	43.2725	128.759	Jianchanggou	Syenite	LA-ICPMS	228	2	Wu et al., 2011
138	07YB23	43.0764	128.547	Qinglinzi	Gabbro	LA-ICPMS	229	2	Wu et al., 2011
139	07YB36	43.0683	128.485	Erbeiqing	Syenite	LA-ICPMS	225	2	Wu et al., 2011
140	1709A	42.8086	128.227	Dongqing	Gt Monzogranite	CHIME (monazite)	159	5	Sun et al., 2009
141	LS1			Mengshan	Granodiorite	LA-ICPMS	187	3	Zhang et al., 2007
142	JEDG-4	42.45	127.512	Erdaogou	Granodiorite	SHRIMP	223	2	Miao et al., 2005
143	BJZ-3	42.4178	127.522	Bajiazi	Quartz Syenite	SHRIMP	218	6	Miao et al., 2005
144	HNH-1	42.9803	127.51	Huangnihe	Monzogranite	SHRIMP	166	2	Miao et al., 2005
145	Dn015	44.3889	130.486	Taipingling	Granodiorite	LA-ICPMS	201	1	Zhao et al., 2009
146	JXNC-I-2			Wudaogou	Gabbro	SHRIMP	270	10	Zhao et al., 2008
147	JXNC-I-1	43.2164	130.883	Xiaoxinancha	Monzogranite	SHRIMP	105	3	Sun et al., 2008
148	JXNC-1	43.1944	130.866	Xiaoxinancha	Granodiorite	SHRIMP	107	2	Sun et al., 2008
149	JXNC-2	43.1314	130.829	Xiaoxinancha	Granodiorite	SHRIMP	112	3	Sun et al., 2008
150	SMZG-1	43.09	127.878	Liukesong	Granodiorite	LA-ICPMS	263	1	S. Liu et al., 2010
151	SMZM-1	43.09	127.878	Liukesong	Gabbro	LA-ICPMS	262	1	S. Liu et al., 2010
152	D0832-6	43.2575	130.997	Taipinggou	High-Mg Diorite	LA-ICPMS	241	1	Fu et al., 2010
153	D0849-1	43.2144	130.888	Xiaoxinancha	High-Mg Diorite	LA-ICPMS	240	1	Fu et al., 2010
154	TH7-10	41.9511	127.004	Linjiang, Tonghua city	Rhyolite		222	1	Yu et al. (2009)
155	HS14-1	44.36	131.118	Nantianmen	Rhyolite		214	2	Xu et al. (2009)
156	HS13-1	44.2236	131.107	Nantianmen	Rhyolite		217	1	Xu et al. (2009)
157	YB1-3	43.3397	129.382	Tianqiaoling	Rhyolite		201	1	Xu et al. (2009)
158	HS15-1	44.2686	131.097	Xintunzi	Rhyolite		208	1	Xu et al. (2009)
159	HS8-2	44.4183	130.922	Suiyangzhen	Dacite		184	2	Xu et al. (2013)
160	HD6-1	43.6461	130.765	Laoheishan	Basaltic Andesite		180	1	Xu et al. (2013)
161	HS1-1	44.6939	130.553	Maqiaohe	Dacite		96	3	Xu et al. (2013)
162	JRH01	46.525	133.644	Changzhengqiao	Dacite		116	2	Xu et al. (2013)
163	JRH03	46.1489	132.844	Quanfa	Andesite		129	3	Xu et al. (2013)
164	HY1-1	46.4475	129.803	Dongfanghong	Andesite		112	1	Xu et al. (2013)
165	HY4-1	46.4567	130.124	Qinglongshan	Dacite		110	2	Xu et al. (2013)
166	HM2-1	45.7408	132.05	Xingkai	Rhyolite		122	2	Xu et al. (2013)
167	HM1-1	45.6631	131.867	Peide	Rhyolite		116	1	Xu et al. (2013)
168	HQ3-1	45.8158	130.951	Qitaihe	Rhyolite		124	3	Xu et al. (2013)
169	YB1-1	43.3397	129.382	Tianqiaoling	Dacite		175	3	Xu et al. (2013)
170	YW3-1	43.2067	129.969	Manhe	Andesite		187	6	Xu et al. (2013)
171	YB4-1	43.1319	129.132	Tuntianying	Andesite		97	1	Xu et al. (2013)
172	YB4-9	43.005	129.189	Badaogou	Dacite		88	2	Xu et al. (2013)
173	YB2-1	43.1639	129.572	Ciweigou	Andesite		176	3	Xu et al. (2013)
174	YH10-1	43.4417	129.012	Helong	Andesite		108	3	Xu et al. (2013)
175	YB2-12	43.2569	130.119	Wangqiang	Andesite		107	1	Xu et al. (2013)
176	SF01-1	44.3608	131.048	Suifenhe	Dacite		93	1	Ji et al. (2007)
177	SF03-4	44.3964	131.114	Suifenhe	Dacite		106	1	Ji et al. (2007)
178	TH7-20	41.9719	127.006	Linjiang	Andesite		131	4	Yu et al. (2009)
179	LJ18-1	41.7186	127.074	Linjiang	Rhyolite		113	4	Yu et al. (2009)
180	JD14	46.4722	130.379	Dyke	Rhyolite		100	2	Sun (2013)
181	JD07	46.4722	130.379	Dyke	Dolerite		100	2	Sun (2013)
182	ML07-1	44.7581	130.71	Yilin	Rhyolite		104	1	Sun (2013)
183	HG02-4	47.3275	130.379	Shihougou	Tuff		100	2	Sun (2013)
184	HN14-2	46.3275	130.973	Dyke	granite porphyry		100	2	Sun (2013)
185	HN18-6	46.3275	130.973	Dyke	Andesite		100	1	Sun (2013)
186	14GW138	46.2628	133.158	Dalingqiao	Rhyolite		182	4	Wang et al. (2017)
187	14GW184	48.0825	133.303	Dalingqiao	Rhyolite		176	3	Wang et al. (2017)
188	14GW144	46.395	133.232	Dababeishan	Rhyolitic tuff		174	3	Wang et al. (2017)
189	14GW152	46.4744	133.296	Dajiahe	Rhyolitic tuff		187	4	Wang et al. (2017)
190	14GW177	48.0825	133.303	Dalingqiao	Andesite		174	2	Wang et al. (2017)
	Liaodong Peninsula
191	Ln09630-11.1	39.0033	121.804	Wanfu, Liaonan	Monzogranite	LA-ICP-MS	170	1	Wang et al., 2012a
192	Ln805012b	39.0033	121.804	Liaonan	Granite	LA-ICP-MS	129	2	Wang et al., 2012a
193	Ln09630-10	39.0033	121.804	Liaonan	Granite	LA-ICP-MS	115	1	Wang et al., 2012a
194	--	--	--	Sanguliu	Granite	TIMS	129	3	Wei et al., 2003
195	LJ023	--	--	Jiuliancheng, Dandong	Monzogranite	SHRIMP	157	6	Li et al., 2004b
196	LJ037	--	--	Gaoliduntai	Plagiogranite	SHRIMP	156	5	Li et al., 2004b
197	FW04-315	39.2017	121.911	Liangjiatai	Granite Dyke	LA-ICP-MS	128	2	Wu et al., 2005a
198	FW04-301	40.2939	122.349	Gudaoling	Dioritic Enclave	LA-ICP-MS	120	1	Wu et al., 2005a
199	FW04-303	40.2939	122.349	Gudaoling	Dioritic Enclave	LA-ICP-MS	121	2	Wu et al., 2005a
200	JH-35	40.2939	122.349	Gudaoling	Dioritic Enclave	LA-ICP-MS	121	3	Wu et al., 2005a
201	FW04-305	40.2939	122.349	Gudaoling	Monzogranite	LA-ICP-MS	121	1	Wu et al., 2005a
202	FW04-319	40.1369	123.154	Dafangshen	Quartz Diorite	LA-ICP-MS	124	3	Wu et al., 2005a
203	FW04-337	40.8692	124.597	Guanshui	Granodiorite	LA-ICP-MS	131	1	Wu et al., 2005a
204	FW01-339	40.8692	124.597	Guanshui	Diabase	LA-ICP-MS	128	1	Wu et al., 2005a
205	FW01-75	40.3094	123.212	Xiuyan	Porphyritic Monzogranite	LA-ICP-MS	213	1	Wu et al., 2005a
206	FW04-324	40.3058	123.23	Xiuyan	Porphyritic Monzogranite	LA-ICP-MS	216	2	Wu et al., 2005a
207	FW04-325	40.3058	123.23	Xiuyan	Monzogranite	LA-ICP-MS	214	1	Wu et al., 2005a
208	FW04-326	40.3058	123.23	Xiuyan	Dioritic Enclave	LA-ICP-MS	212	1	Wu et al., 2005a
209	FW02-63	40.3136	123.28	Tongjiabuzi	Diorite	LA-ICP-MS	214	2	Wu et al., 2005a
210	FW01-92	40.6408	123.528	Shuangyashan	Porphyritic Granite	TIMS	224	1	Wu et al., 2005a
211	FW01-94	40.5872	123.55	Laojiadingzi	Diorite	TIMS	220	1	Wu et al., 2005a
212	03JH021	38.7617	121.128	Yujiagou	Syenite	LA-ICP-MS	219	1	Wu et al., 2005a
213	03JH025	38.7561	121.129	Yinjiagou	Diabase	SHRIMP	213	4	Wu et al., 2005a
214	FW04-332	40.9108	124.549	Bailinchuan	Syenite	LA-ICP-MS	231	1	Wu et al., 2005a
215	FW01-424	40.9611	124.269	Saima	Syenite	TIMS	233	1	Wu et al., 2005a
216	SG-1	40.1	124.25	Sanguliu	Porphyritic Granite	SHRIMP	125	3	Wu et al., 2005b
217	WL11-4	40.1667	124.2	Wulong gold mine	Granitic Porphyry	SHRIMP	125	4	Wu et al., 2005b
218	WL11-8	40.1667	124.2	Wulong gold mine	Foliated Dioritic Dyke	SHRIMP	125	2	Wu et al., 2005b
219	WL11-3	40.1667	124.2	Wulong gold mine	Undeformed Dioritic Dyke	SHRIMP	117	7	Wu et al., 2005b
220	WL11-26	40.1667	124.2	Wulong gold mine	Undeformed Dioritic Dyke	SHRIMP	121	4	Wu et al., 2005b
221	FW01-57	39.1958	121.839	Zhaotun	Fine-Grained Monzogranite	LA-ICP-MS	128	5	Wu et al., 2005b
222	SK14-1	39.3542	122.166	Wazidian	Monzogranite	LA-ICP-MS	120	4	Wu et al., 2005b
223	SK11-1	39.6058	122.299	Yinmawanshan	Gneissic Granidiorite	LA-ICP-MS	122	2	Wu et al., 2005b
224	SK11-4	39.6058	122.299	Yinmawanshan	Fine-Grained Monzogranite Dyke	LA-ICP-MS	124	5	Wu et al., 2005b
225	FW02-39	39.6325	122.369	Yinmawanshan	Fine-Grained Monzogranite	LA-ICP-MS	122	6	Wu et al., 2005b
226	FW02-41	39.8131	122.397	Shuangta	Porphyritic Granite	LA-ICP-MS	129	2	Wu et al., 2005b
227	FW01-38	39.9378	122.402	Miaoling	Quartz Diorite	LA-ICP-MS	127	4	Wu et al., 2005b
228	FW01-18	39.9539	122.204	Wanjialing	Granodiorite	LA-ICP-MS	121	2	Wu et al., 2005b
229	FW01-21	40.0461	122.209	Gudaoling	Porphyritic Monzogranite	LA-ICP-MS	118	3	Wu et al., 2005b
230	FW01-26	40.2461	122.415	Gudaoling	Fine-Grained Monzogranite	LA-ICP-MS	122	2	Wu et al., 2005b
231	FW01-162	41.0206	123.069	Qianshan	Syenogranite	LA-ICP-MS	126	2	Wu et al., 2005b
232	FW01-154	40.9244	123.427	Tianshui	Diabase Dyke	LA-ICP-MS	126	4	Wu et al., 2005b
233	FW01-98	40.5967	123.976	Jiguanshan	Porphyritic Monzogranite	LA-ICP-MS	130	3	Wu et al., 2005b
234	FW01-141	41.1803	124.796	Jiucaidingzi	Monzogranite	LA-ICP-MS	121	2	Wu et al., 2005b
235	FW01-144	41.0703	124.366	Jiucaidingzi	Monzogranitic Porphyrite	LA-ICP-MS	128	2	Wu et al., 2005b
236	FW01-404	39.8467	123.347	Anzishan	Porphyritic Monzogranite	LA-ICP-MS	124	2	Wu et al., 2005b
237	FW02-70	41.4892	123.541	Chaoyang	Monzonite	LA-ICP-MS	127	1	Wu et al., 2005b
238	FW02-79	40.4764	123.553	Chaoyang	Quartz Monzonite	LA-ICP-MS	128	2	Wu et al., 2005b
239	FW01-127	40.3458	124.388	Wulongbei	Porphyritic Granodiorite	LA-ICP-MS	127	5	Wu et al., 2005b
240	FW02-84	40.1042	124.258	Sanguliu	Porphyritic Monzogranite	LA-ICP-MS	120	2	Wu et al., 2005b
241	FW01-121	40.1036	124.239	Sanguliu	Gneissic Monzogranite	LA-ICP-MS	131	2	Wu et al., 2005b
242	FW01-65	39.845	122.988	Dexingjie	Porphyritic Granodiorite	LA-ICP-MS	128	3	Wu et al., 2005b
243	FW01-67	39.915	123.029	Shimiaoshan	Diorite	TIMS	120	2	Wu et al., 2005b
244	FW01-108	40.4169	124.061	Fenghuangshan	Alkali Feldspar Granite	TIMS	130	2	Wu et al., 2005b
245	FW01-109	40.2722	124.278	Wulongbei	Porphyritic Granodiorite	TIMS	125.8	0.7	Wu et al., 2005b
246	FW01-110	40.2714	124.33	Dingqishan	Syenogranite	TIMS	121.1	0.6	Wu et al., 2005b
247	FW01-139	41.115	124.732	Sipingjie	Alkaline Granite	TIMS	130	0.9	Wu et al., 2005b
248	BY6-3	40.8667	123.633	Baiyun gold mine	Porphyritic Dyke	SHRIMP	168	3	Wu et al., 2005c
249	FW01-55	39.2933	121.865	Xiaoheishan	Granodiorite	LA-ICP-MS	174	4	Wu et al., 2005c
250	FW01-363	39.3203	121.927	Xiaoheishan	Granodiorite	LA-ICP-MS	173	4	Wu et al., 2005c
251	FW01-28	40.2206	122.473	Yutun	Mylonitic Granite	LA-ICP-MS	157	3	Wu et al., 2005c
252	FW01-157	40.7228	122.998	Southern Hanjialing	Monzogranite	LA-ICP-MS	179	3	Wu et al., 2005c
253	WL11-19	40.1667	124.2	Wulong gold mine	Monzogranite	SHRIMP	163	7	Wu et al., 2005c
254	FW01-156	40.7789	123.062	Northern Hanjialing	Monzogranite	LA-ICP-MS	164	4	Wu et al., 2005c
255	FW01-148	40.3097	124.513	Jiuliancheng	Monzogranite	LA-ICP-MS	156	3	Wu et al., 2005c
256	FW01-119	40.1294	124.161	Heigou	Monzogranite	LA-ICP-MS	173	6	Wu et al., 2005c
257	FW01-129	40.4236	124.449	Lianhuapen	Monzogranite	LA-ICP-MS	161	6	Wu et al., 2005c
258	05FW023	39.3184	121.891	Xiaoheishan	Diorite	LA-ICP-MS	170	4	Yang et al., 2007a
259	05FW024	39.3184	121.891	Xiaoheishan	Granite	LA-ICP-MS	177	2	Yang et al., 2007a
260	05FW026	39.3184	121.891	Xiaoheishan	Granitic Pegmatite	LA-ICP-MS	175	1	Yang et al., 2007a
261	05FW025	39.3184	121.891	Xiaoheishan	Diorite	LA-ICP-MS	174	1	Yang et al., 2007a
262	05FW022	39.3184	121.891	Xiaoheishan	Granodiorite	LA-ICP-MS	174	1	Yang et al., 2007a
263	FW04-326	40.1963	123.232	Xiuyan	Mafic Microgranular Enclaves	LA-ICP-MS	211	1	Yang et al., 2007b
264	FW04-324	40.1963	123.232	Xiuyan	Monzogranite	LA-ICP-MS	210	1	Yang et al., 2007b
265	FW04-325	40.1963	123.232	Xiuyan	Monzogranite	LA-ICP-MS	210	1	Yang et al., 2007b
266	03JH025	38.756	121.129	Yinjiagou	Diabase Dyke	LA-ICP-MS	139	2	Yang et al., 2007d
267	JH-62	39.32	121.927	Liaonan	Deformed Mafic Dyke	LA-ICP-MS	113.9	1.6	Yang et al., 2007c
268	DD02-1	40.11	124.201	Yaolingzigou, Tangzhizhen, Dandong	Monzogranite	LA-ICP-MS	129	1	Meng et al., 2013
269	DD04-1	40.3267	124.002	Bujiagou, Tangshanzhen, Dandong	Hornblende Biotite Monzogranite	LA-ICP-MS	126	1	Meng et al., 2013
270	DD08-1	40.5244	124.624	Wanjiadian, Kuandian	Grbbro	LA-ICP-MS	127	1	Meng et al., 2013
271	DD08-2	40.5244	124.624	Wanjiadian, Kuandian	Biotite Monzogranite	LA-ICP-MS	123	1	Meng et al., 2013
272	HZY-4	--	--	Huaziyun magnesite ore district	Lamprophyre Dyke	SHRIMP	155	4	Jiang et al., 2005
273	SL0536	--	--	Zhaofang pluton	Biotite Granite	SHRIMP	113	2	Ji et al., 2009
274	SL0543	--	--	Yinmawanshan pluton	Biotite Monzogranite	LA-ICP-MS	124	3	Ji et al., 2009
275	SK11-1	39.6203	122.305	Yinmawanshan pluton	Gneissic Granite	LA-ICP-MS	122	2	Guo et al., 2004
276	SK11-1	39.6203	122.305	Yinmawanshan pluton	Gneissic Granite	TIMS	125	2	Guo et al., 2004
277	FW02-41	39.851	122.371	Yinmawanshan pluton	Porphyritic Granite	LA-ICP-MS	129	2	Guo et al., 2004
278	SK11-4	39.6203	122.294	Yinmawanshan pluton	Monzogranitic Dyke	LA-ICP-MS	124	5	Guo et al., 2004
279	SK11-4	39.6203	122.294	Yinmawanshan pluton	Monzogranitic Dyke	TIMS	120	4	Guo et al., 2004
280	FW02-39	39.7192	122.349	Yinmawanshan pluton	Monzogranite	LA-ICP-MS	122	6	Guo et al., 2004
281	SL06078	--	--	Huanghuadian	Rhyolite	SHRIMP	135	1	Shen et al., 2011
282	SL0826	--	--	Dayingzi	Andesite	LA-ICP-MS	132	5	Shen et al., 2011
283	SL0585	39.5053	122.003	Wafangdian-Pulandian	Andesite	SHRIMP	126	6	Liu et al., 2011
284	S10768	40.0656	124.322	Dandong	Andesite	LA-ICP-MS	106	3	Liu et al., 2011
285	SL0734-4	40.7578	124.014	Tongyuanpu	Granite Dyke	LA-ICP-MS	116	2	Liu et al., 2011
286	SL0719	41.0863	123.815	Benxi	Rhyolite	LA-ICP-MS	126	3	Liu et al., 2011
287	QCZ-3	--	--	Shuangdinggou, Qingchengzi ore field	Porphyritic Biotite Monzogranite	LA-ICP-MS	224	1	Duan et al., 2012
288	04LN680	--	--	Xinling, Qingchengzi ore field	Granite	SHRIMP	225.3	1.8	Yu et al., 2009
289	04LN683	--	--	Yaojiagou, Qingchengzi ore field	Granite	SHRIMP	184.5	1.6	Yu et al., 2009
290	2007JCB-33	42.7616	122.787	Qianchaotiehe Village, Haicheng	Gabbro	SHRIMP	126	4	Miao et al., 2010
291	DD22-1	--	--	Hujiakouzi, Dandong	Olivine Websterite	LA-ICP-MS	130	2	Pei et al., 2011b
292	DD17-1	--	--	Qianrentun, Dandong	Amphibole Gabbro-Diorite	SHRIMP	129	5	Pei et al., 2011b
293	DD3-1	--	--	Yangmuchuan, Dandong	Amphibole Gabbro	LA-ICP-MS	132	2	Pei et al., 2011b
294	g2605	38.9025	119.976	Bohai Bay Basin	Trachyandesite	LA-ICPMS	150.6	3.7	Fu et al., 2022, JAES
295	P01-1	38.6718	120.075	Bohai Bay Basin	Trachyandesite	LA-ICPMS	115.3	3.2	Fu et al., 2022, JAES
296	B01-3	38.7927	119.844	Bohai Bay Basin	Trachyandesite	LA-ICPMS	114.6	2.5	Fu et al., 2022, JAES
297	B02-1	38.8366	120.19	Bohai Bay Basin	Tuff	LA-ICPMS	115.7	1.9	Fu et al., 2022, JAES
298	K36-1	38.7025	117.31	Bohai Bay Basin	Andesite	LA-ICPMS	123.4	2.2	Zhu et al., 2019
299	X6-1	38.5316	117.612	Bohai Bay Basin	Andesite	LA-ICPMS	123.1	1.9	Zhu et al., 2019
300	X6-4	38.5316	117.612	Bohai Bay Basin	Rhyolitic Breccia Tuff	LA-ICPMS	123.1	1.9	Zhu et al., 2019
301	X6-5	38.5316	117.612	Bohai Bay Basin	Rhyolitic Breccia Tuff	LA-ICPMS	111.9	1	Zhu et al., 2019
302	Y23-1	38.6765	117.574	Bohai Bay Basin	Tuffite	LA-ICPMS	111.46	0.76	Zhu et al., 2019
303	B-1387.6	38.6751	120.47	Bohai Bay Basin	Granodiorite	LA-ICP-MS	155.4	2.5	Zhao et al., 2017
304	A-1405	38.6751	120.47	Bohai Bay Basin	Monzonitic Granite	LA-ICP-MS	164.2	1.9	Zhao et al., 2017
305	A-1500	38.6751	120.47	Bohai Bay Basin	Monzonitic Granite	LA-ICP-MS	160.6	1.7	Zhao et al., 2017
306	Dg102-2	41.18	121.81	Liaohe West Depression, Bohai Bay Basin	Dioritic Porphyrite	LA-ICP-MS	165	2	Sun et al.，2017
307	T32-1	41.7019	122.752	Liaohe West Depression, Bohai Bay Basin	Rhyolite	LA-ICP-MS	121	2	Sun et al.，2017
308	Dg102-4	41.18	121.81	Liaohe West Depression, Bohai Bay Basin	Dioritic Porphyrite	LA-ICP-MS	163	1	Sun et al.，2017
309	Qg2-4	41.1361	121.766	Liaohe West Depression, Bohai Bay Basin	Dacite	LA-ICP-MS	162	1	Sun et al.，2017
310	T33-1	41.7019	122.752	Liaohe West Depression, Bohai Bay Basin	Rhyolite	LA-ICP-MS	122	1	Sun et al.，2017
	Yanbian-Liaobei
311	08JF107	--	--	Mayihe	Pyroxene Diorite	SIMS	222	2	Yang et al., 2012b
312	08JF109	--	--	Mayihe	Pyroxene Syenodiorite	SIMS	223	2	Yang et al., 2012b
313	08JF111	--	--	Mayihe	Fine-Grained Diorite	SIMS	222	2	Yang et al., 2012b
314	08JF103	--	--	Mayihe	Biotite Monzogranite	LA-ICP-MS	220	2	Yang et al., 2012b
315	08JF105	--	--	Mayihe	Biotite Monzogranite	LA-ICP-MS	223	3	Yang et al., 2012b
316	08JF116	--	--	Mayihe	Biotite Monzogranite	LA-ICP-MS	221	2	Yang et al., 2012b
317	08JF150	--	--	Longtou	Granodiorite	SIMS	224	2	Yang et al., 2012b
318	08JF152	--	--	Longtou	Granodiorite	LA-ICP-MS	220	2	Yang et al., 2012b
319	08JF154	--	--	Longtou	Fine-Grained Granite	LA-ICP-MS	221	2	Yang et al., 2012b
320	08JF144	--	--	Xiaoweishahe	Quartz Diorite	LA-ICP-MS	220	2	Yang et al., 2012b
321	08JF146	--	--	Xiaoweishahe	Quartz Diorite	LA-ICP-MS	219	4	Yang et al., 2012b
322	08JF147	--	--	Xiaoweishahe	Granodiorite	LA-ICP-MS	218	2	Yang et al., 2012b
323	08JF160	--	--	Chaxinzi	Granodiorite	SIMS	222	1	Yang et al., 2012b
324	08JF162	--	--	Chaxinzi	Diorite	SIMS	221	2	Yang et al., 2012b
325	08JF161	41.4244	125.76	Chaxinzi	Monzodiorite	LA-ICP-MS	222	2	Yang et al., 2012b
326	08JF163	41.4244	125.76	Chaxinzi	Diorite	LA-ICP-MS	219	4	Yang et al., 2012b
327	08JF165	41.4244	125.76	Chaxinzi	Monzogranite	LA-ICP-MS	222	2	Yang et al., 2012b
328	08JF167	41.4244	125.76	Chaxinzi	Monzogranite	LA-ICP-MS	219	2	Yang et al., 2012b
329	08JF183	41.6867	124.682	Xidadingzi	Monzogranite	LA-ICP-MS	220	2	Yang et al., 2012b
330	08JF186	41.6867	124.682	Xidadingzi	Monzogranite	LA-ICP-MS	221	2	Yang et al., 2012b
331	08JF192	41.7526	124.652	Nankouqian	Monzogranite	SIMS	224	2	Yang et al., 2012b
332	08JF194	41.7526	124.652	Nankouqian	Monzogranite	LA-ICP-MS	221	2	Yang et al., 2012b
333	Lu92010	--	--	Longtou	Quartz Diorite	TIMS	217	9	Lu et al., 2003
334	XXII-34	--	--	Longtou	Granodiorite	TIMS	203	9	Lu et al., 2003
335	Lu0005	--	--	Xiaoweishahe	Granodiorite	TIMS	217	7	Lu et al., 2003
336	Lu62011	--	--	Chaxinzi	Adamellite	TIMS	216	6	Lu et al., 2003
337	09354-1	43.0917	124.718	Shilingzhen, Siping	Granodiorite	LA-ICP-MS	164	2	Zhang et al., 2014--ESR
338	09361-1	42.7275	124.292	Weiyuanbuzhen, Kaiyuan	Granodiorite	LA-ICP-MS	173	3	Zhang et al., 2014--ESR
339	Cy101-1	--	--	Sankeyushu, Tonghua	Trachyte	LA-ICP-MS	118	2	Sui and Chen, 2012
340	LJ22-1	41.9474	127.123	Liudaogou pluton, Ji'an	Monzogranite	LA-ICP-MS	126	1	Pei et al., 2011a
341	BS3-5	41.8358	126.839	Toudaogou pluton, Ji'an	Syenogranite	LA-ICP-MS	130	1	Pei et al., 2011a
342	JA28-1	41.8863	126.814	Xingfu pluton, Ji'an	Granodiorite	LA-ICP-MS	127	1	Pei et al., 2011a
343	JA3-1	41.5282	126.191	Ji'an pluton	Granitic Porphyrite	LA-ICP-MS	127	1	Pei et al., 2011a
344	JA13-1	41.5282	126.191	Ji'an pluton	Syenogranite	LA-ICP-MS	125	1	Pei et al., 2011a
345	JA10-1	41.5282	126.191	Ji'an pluton	Alkali Feldspar Granite	LA-ICP-MS	123	1	Pei et al., 2011a
346	JA17-1	40.858	125.905	Yushulinzi pluton, Ji'an	Syenogranite	LA-ICP-MS	123	1	Pei et al., 2011a
347	JA26-1	40.7152	125.63	Lujiangchun pluton, Ji'an	Syenogranite	LA-ICP-MS	122	1	Pei et al., 2011a
348	JA20-1	40.7152	125.51	Zhenjiang pluton, Ji'an	Granodiorite	LA-ICP-MS	123	1	Pei et al., 2011a
349	TH4-2	--	--	Shanpengdianzi, Tonghua	Dolerite	LA-ICP-MS	137	3	Pei et al., 2011b
350	TH20-1	41.6177	125.988	Caobaishong, Tonghua	Gabbro	SHRIMP	134	7	Pei et al., 2011b
351	TH7-29	41.8441	127.142	Mayihe, Linjiang	Gabbroic Diorite	LA-ICP-MS	224	4	Pei et al., 2008a
352	TH7-25	41.8441	127.142	Mayihe, Linjiang	Monzogranite	LA-ICP-MS	226	3	Pei et al., 2008a
353	B04	--	--	Mengjialing, Siping	Biotite Monzogranite	LA-ICP-MS	172	2	Ren et al., 2009b
354	CH11	43.6297	125.608	Drilling hole of Yishu graben	Alkali Feldspar Granite	LA-ICP-MS	162	2	Xu et al., 2008
355	X13	43.6014	125.604	Drilling hole of Yishu graben	Monzogranite	LA-ICP-MS	176	1	Xu et al., 2008
356	C24-1	43.8536	126.17518	Drilling hole of Yitong basin	Biotite Monzogranite	LA-ICP-MS	177	2	Zou et al., 2011
357	C17-1	43.6504	125.94722	Drilling hole of Yitong basin	Monzonite	LA-ICP-MS	172	3	Zou et al., 2011
358	X5-1	43.5563	125.61900	Drilling hole of Yitong basin	Granite	LA-ICP-MS	172	2	Zou et al., 2011
359	L2-1	43.5224	125.52788	Drilling hole of Yitong basin	Porphyritic Granite	LA-ICP-MS	171	3	Zou et al., 2011
360	Y3-1	--	--	Drilling hole of Yitong basin	Monzogranite	LA-ICP-MS	249	2	Zou et al., 2011
361	Y53-1	43.3555	125.12894	Drilling hole of Yitong basin	Pyroxene Diorite	LA-ICP-MS	186	2	Zou et al., 2011
362	J016-5	41.6036	126.048	Longtou, Tonghua	Granite	LA-ICP-MS	222	6	Qin, 2010
363	J015-10	41.6036	126.048	Longtou,Tonghua	Granite	LA-ICP-MS	226	4	Qin, 2010
364	J019-3	41.8377	126.802	Caoshan, Linjiang	Granite	LA-ICP-MS	179	2	Qin, 2010
365	J021-2	41.8369	126.674	Laotudingzi, Linjiang	Granite	LA-ICP-MS	178	2	Qin, 2010
366	J001-2	41.2632	126.234	Gaotaizi, Ji’an	Alkali Feldspar Granite	LA-ICP-MS	125	2	Qin, 2010
367	J022-1	41.5954	126.493	Toudaogou, Ji’an	Alkali Feldspar Granite	LA-ICP-MS	124	2	Qin, 2010
368	J006-6	41.4984	126.341	Laoling, Ji’an	Alkali Feldspar Granite	LA-ICP-MS	122	2	Qin, 2010
369	J010-1	41.4984	126.341	Laoling, Ji’an	Diorite	LA-ICP-MS	119	2	Qin, 2010
370	J004-1	41.3056	126.222	Shanglüshuiqian, Ji’an	Granite	LA-ICP-MS	118	2	Qin, 2010
371	LK04-2	--	--	Jianpingzhen, Xifeng	Biotite Monzogranite	LA-ICP-MS	249	1	Cao et al., 2013
372	LK16-1	--	--	Bakeshu, Qingyuan	Harzburgite	LA-ICP-MS	222	3	Cao et al., 2013
373	LK11-1	42.3417	124.344	Weijiapuzi	Gabbro	LA-ICPMS	163	3	Zhang et al., 2016b
374	LK14-1	42.33	124.797	Lijiatai	Granodiorite	LA-ICPMS	169	2	Zhang et al., 2016b
375	LK07-1	42.6403	124.17	Zhaojiatai	Gabbro	LA-ICPMS	175	1	Zhang et al., 2016b
376	LK20-2	43.3847	125.443	Shangcheng Town	Gneissic Monzogranite	LA-ICPMS	175	1	Zhang et al., 2016b
377	11LK31-3	43.3881	125.021	Kaoshan Town	Granodiorite	LA-ICPMS	170	1	Zhang et al., 2016b
378	LK03-1	42.8839	124.438	Yangmulinzi	Gneissic Granodiorite	LA-ICPMS	165	1	Zhang et al., 2016b
379	LK05-1	42.7131	124.321	Weiyuanpu	Granodiorite	LA-ICPMS	163	1	Zhang et al., 2016b
380	18JF44	41.219	125.386	Hengren	Trachyte	LA-ICP-MS	129	1	Feng et al., 2020
381	18JF10	41.5991	125.115	Xinbin	Trachyte	LA-ICP-MS	129	1	Feng et al., 2020
382	18JF24	41.8444	125.789	Tonghua	Trachyte	LA-ICP-MS	126	1	Feng et al., 2020
383	18JF21	41.7908	125.906	Tonghua	Trachyte	LA-ICP-MS	124	1	Feng et al., 2020
	Jiamusi Block
384	0SW204	47.2047	129.993	Luobei		SHRIMP	515	8	Wilde et al., 2003
385	97SAW027	44.6944	129.694	Chaihe		SHRIMP	254	4	Wu et al. (2001b)
386	97SAW028	45.1242	130.042	Chushan		SHRIMP	256	5	Wu et al. (2001b)
387	97SW033	45.2097	130.475	Ximashan		SHRIMP	507	12	Wilde et al. (2000)
388	97SW034	45.2097	130.475	Ximashan		SHRIMP	500	9	Wilde et al. (2000)
389	98SW119	45.4811	130.574	Qingshan		SHRIMP	270	4	Wu et al. (2001b)
390	DM1	45.1717	130.673	Dongmashan		SHRIMP	523	8	Wilde et al. (2003)
391	FW04-202	45.9722	133.665	Hutou		SHRIMP	518	7	Wilde et al. (2010)
392	FW04-207	45.9978	133.594	Hutou		SHRIMP	491	4	Wilde et al. (2010)
393	M1	45.2633	130.803	Liumao		SHRIMP	502	8	Wilde et al. (1997)
394	M3	45.2633	130.803	Liumao		SHRIMP	502	10	Wilde et al. (1997)
395	M5	45.2633	130.803	Liumao		SHRIMP	501	18	Wilde et al. (2003)
396	M7	45.2633	130.803	Liumao		SHRIMP	498	7	Wilde et al. (1997)
397	M9B	45.1628	130.687	Shichang		SHRIMP	267	2	Wu et al. (2001b)
398	SY06			Meizuo		LA-ICP-MS	259	4	Huang et al. (2008)
399				Majiajie		LA-ICP-MS	504	2	Huang et al. (2009)

## Sheet: Sikhote-Alin (SA)
Order	Sample	Location	Latitude (N)	Longitude (E)	Rock types	Method	Age (Ma)		Reference
							206Pb/238U or 207Pb/206Pb	Error
1	SK15-09	S. Sakhalin	46.1185	143.459	Leucogranite	Zircon U-Pb	40.7	0.7	Liao et al., 2018
2	SK15-08	S. Sakhalin	46.1132	143.46	Leucogranite	Zircon U-Pb	40.2	0.6	Liao et al., 2018
3	SK15-07	S. Sakhalin	46.1104	143.461	Granodiorite	Zircon U-Pb	40.5	0.9	Liao et al., 2018
4	SK15-06	S. Sakhalin	46.1057	143.464	Granodiorite	Zircon U-Pb	40.5	0.7	Liao et al., 2018
5	SK15-04	S. Sakhalin	46.1041	143.466	Cordierite-Biotite Granite	Zircon U-Pb	41.3	1	Liao et al., 2018
6	SK15-03	S. Sakhalin	46.1831	143.461	Biotite Granite	Zircon U-Pb	40.2	0.6	Liao et al., 2018
7	SK15-02	S. Sakhalin	46.176	143.457	Granodiorite	Zircon U-Pb	40.9	0.5	Liao et al., 2018
8	SK15-01	S. Sakhalin	46.1692	143.457	Aplite	Zircon U-Pb	40.5	0.5	Liao et al., 2018
9	SK14-12	S. Sakhalin	46.6474	143.505	Rhyolite (Dike)	Zircon U-Pb	42.7	0.5	Liao et al., 2018
10	SK14-10	S. Sakhalin	46.6424	143.508	Rhyolite (Dike)	Zircon U-Pb	42.9	0.8	Liao et al., 2018
11	SK14-14	S. Sakhalin	46.6553	143.502	Dacite (Dike)	Zircon U-Pb	44.4	0.6	Liao et al., 2018
12	SK14-15	S. Sakhalin	46.6655	143.499	Granite	Zircon U-Pb	44.1	0.5	Liao et al., 2018
13	SK14-07	S. Sakhalin	46.6813	143.498	Granodiorite	Zircon U-Pb	43	0.6	Liao et al., 2018
14	SK14-06b	S. Sakhalin	46.6908	143.496	Granite	Zircon U-Pb	42.1	0.8	Liao et al., 2018
15	SK14-05	S. Sakhalin	46.6913	143.497	Granite	Zircon U-Pb	43	0.6	Liao et al., 2018
16	SK14-04	S. Sakhalin	46.6922	143.497	Granite	Zircon U-Pb	42.6	0.6	Liao et al., 2018
17	SK14-03	S. Sakhalin	46.6932	143.497	Granite	Zircon U-Pb	43.5	0.8	Liao et al., 2018
18	SK14-02	S. Sakhalin	46.6943	143.498	Granite	Zircon U-Pb	43.2	0.5	Liao et al., 2018
19	SK15-20	Central Sakhalin	50.0284	143.084	Granite	Zircon U-Pb	37	1	Zhao et al., 2019
20	SK15-22	Central Sakhalin	50.0275	143.081	Granite	Zircon U-Pb	37	1	Zhao et al., 2019
21	SK15-32	Central Sakhalin	50.2303	143.032	Granite	Zircon U-Pb	36	1	Zhao et al., 2019
22	SK15-35	Central Sakhalin	50.2511	142.984	Granodiorite	Zircon U-Pb	37	1	Zhao et al., 2019
23	SK15-39	Central Sakhalin	50.2505	142.969		Zircon U-Pb	38	1	Zhao et al., 2019
24	SK15-40	Central Sakhalin	50.2147	142.975		Zircon U-Pb	37	1	Zhao et al., 2019
25	14RF37-6	S. Sikhote-Alin	43.35	133.75	Syenogranite	Zircon U-Pb	92	1	Tang et al., 2016, Lithos
26	14RF37-1	S. Sikhote-Alin	43.35	133.75	Syenogranite	Zircon U-Pb	91	1	Tang et al., 2016, Lithos
27	14RF35-1	S. Sikhote-Alin	43.15	134.4	Monzogranite	Zircon U-Pb	83	1	Tang et al., 2016, Lithos
28	14RF34-1	S. Sikhote-Alin	43.6	135.2	Monzogranite	Zircon U-Pb	56	1	Tang et al., 2016, Lithos
29	Cha2231/2	S. Sikhote-Alin	44.3189	132.342	Dacite	Zircon U-Pb	44.9	1.3	Wu et al., 2017
30	Cha2320/1	S. Sikhote-Alin	43.2425	131.403	Dacite	Zircon U-Pb	44.5	1.1	Wu et al., 2017
31	Cha2357	S. Sikhote-Alin	43.2601	131.348	Rhyodacite	Zircon U-Pb	42.6	1	Wu et al., 2017
32	Cha2356	S. Sikhote-Alin	43.2544	131.347	Dacite	Zircon U-Pb	40.8	1.7	Wu et al., 2017
33	Cha2324	S. Sikhote-Alin			Basaltic Andesite	Zircon U-Pb	103.4	1.4	Wu et al., 2017
34	Cha2404	S. Sikhote-Alin	43.3597	131.557	Dacite	Zircon U-Pb	101.7	1	Wu et al., 2017
35	IL12/6	S. Sikhote-Alin	45.6352	133.638	Subvolcanic Dacite	Zircon U-Pb	125.1	1.5	Wu et al., 2017
36	KR13/2	S. Sikhote-Alin	42.979	132.512	Subvolcanic Dacite	Zircon U-Pb	131.4	1.5	Wu et al., 2017
37	IL12/2	S. Sikhote-Alin	45.6358	133.637	Subvolcanic Dacite	Zircon U-Pb	130.8	3	Wu et al., 2017
38	SAL-45	Khanka	44.4414	134.68	Granite	Zircon U-Pb	102	1	Zhao et al., 2017
39	SAL-55	Zhuravlevka	43.8933	135.469	Rhyolite	Zircon U-Pb	67	1	Zhao et al., 2017
40	SAL-15	Taukha	44.3144	133.613	Andesite	Zircon U-Pb	64	1	Zhao et al., 2017
41	SAL-16	Khanka	44.2878	133.653	Rhyolite	Zircon U-Pb	57	1	Zhao et al., 2017
42	SAL-42	Khanka	44.3622	134.417	Rhyolite	Zircon U-Pb	80	1	Zhao et al., 2017
43	SAL-52	Samarka	44.085	135.137	Rhyolite	Zircon U-Pb	79	1	Zhao et al., 2017
44	SAL-56	Taukha	44.1781	135.139	Rhyolite	Zircon U-Pb	67	1	Zhao et al., 2017
45	SAL-57	Taukha	44.4942	135.387	Granite	Zircon U-Pb	75	1	Zhao et al., 2017
46	SAL-61	Zhuravlevka	44.3425	135.84	Andesite	Zircon U-Pb	74	1	Zhao et al., 2017
47	SAL-62	Taukha	44.3425	135.84	Dacite	Zircon U-Pb	73	1	Zhao et al., 2017
48	8-872/1	Taukha	46.4036	135.827	Granodiorite	Zircon U-Pb	105.9	1	Jahn et al., 2015
49	8-871/1	S. Sikhote-Alin	46.5008	135.897	Melanogranite	Zircon U-Pb	108.8	0.8	Jahn et al., 2015
50	8-11-51/3	N. Sikhote-Alin	47.0481	134.506	Monzodiorite	Zircon U-Pb	108.1	1.1	Jahn et al., 2015
51	AH-2-11	S. Sikhote-Alin	49.3467	137.803	Melanogranite	Zircon U-Pb	108.1	1.3	Jahn et al., 2015
52	8-111-54/1	S. Sikhote-Alin	47.0347	134.59	Monzogranite	Zircon U-Pb	131.4	2	Jahn et al., 2015
53	AH-3-11	N. Sikhote-Alin	49.3425	137.624	Leucogranite	Zircon U-Pb	57.8	1.1	Jahn et al., 2015
54	8-881/2	S. Sikhote-Alin	42.6844	133.038	Granodiorite	Zircon U-Pb	92.9	0.9	Jahn et al., 2015
55	2008-02-01	S. Sikhote-Alin	42.7619	133.038	Monzogranite	Zircon U-Pb	67.8	0.9	Jahn et al., 2015
56	4G-410	N. Sikhote-Alin	50.5833	136.167	Granite	Zircon U-Pb	91.5	0.8	Jahn et al., 2015
57	4G-332	N. Sikhote-Alin	50.5833	136	Monzogranite	Zircon U-Pb	92.4	0.8	Jahn et al., 2015
58	GV-1774	S. Sikhote-Alin	45.1667	134.833	Granite	Zircon U-Pb	88.3	0.8	Jahn et al., 2015
59	GV-1583-2	S. Sikhote-Alin	44.55	134.25	Monzogranite	Zircon U-Pb	86	0.8	Jahn et al., 2015
60	GV-722	S. Sikhote-Alin	44.25	134.333	Granite	Zircon U-Pb	74.4	0.9	Jahn et al., 2015
61	B-984	S. Sikhote-Alin	43.0303	134.167	Granite	Zircon U-Pb	78.1	0.8	Jahn et al., 2015
62	B-919b	S. Sikhote-Alin	43.1192	134.356	Granodiorite	Zircon U-Pb	80.8	0.8	Jahn et al., 2015
63	B-783M	S. Sikhote-Alin	43.6331	135.218	Granodiorite	Zircon U-Pb	77.7	0.9	Jahn et al., 2015
64	B-621	S. Sikhote-Alin	43.6706	135.226	Diorite	Zircon U-Pb	70.8	0.8	Jahn et al., 2015
65	B-574	S. Sikhote-Alin	43.6433	135.221	Granite	Zircon U-Pb	82.7	0.8	Jahn et al., 2015
66	B-719	S. Sikhote-Alin	43.8097	135.466	Granite	Zircon U-Pb	70.7	0.8	Jahn et al., 2015
67	B-456	S. Sikhote-Alin	43.9172	135.469	Granite	Zircon U-Pb	70.5	0.9	Jahn et al., 2015
68	B-448	S. Sikhote-Alin	43.9267	135.467	Granodiorite	Zircon U-Pb	64	0.7	Jahn et al., 2015
69	B-301a	S. Sikhote-Alin	44.4881	136.125	Granite	Zircon U-Pb	57.1	0.4	Jahn et al., 2015
70	B-300	S. Sikhote-Alin	44.5011	136.17	Diorite	Zircon U-Pb	56.3	0.7	Jahn et al., 2015
71	RPM08	S. Sikhote-Alin	44.3626	134.416	Rhyorite	Zircon U-Pb	64.2	2.8	Tsutsumi et al., 2016
72	RPM12	S. Sikhote-Alin	44.2749	134.777	Rhyorite	Zircon U-Pb	60	0.9	Tsutsumi et al., 2016
73	RPM18	S. Sikhote-Alin	43.8222	135.275	Rhyorite	Zircon U-Pb	55	1.3	Tsutsumi et al., 2016
74	RPM19	S. Sikhote-Alin	43.7359	135.266	Granitoid	Thorite U-Pb	55.7	0.7	Tsutsumi et al., 2016
75	RPM29	S. Sikhote-Alin	42.7295	133.073	Granitoid	Zircon U-Pb	88.1	1.1	Tsutsumi et al., 2016
76	RPM31	S. Sikhote-Alin	42.7714	133.198	Granitoid	Monazite U-Pb	71.9	2.5	Tsutsumi et al., 2016
77	RPM32	S. Sikhote-Alin	42.7821	133.132	Granitoid	Monazite U-Pb	91.7	4.1	Tsutsumi et al., 2016
78	RPM37	S. Sikhote-Alin	43.4804	133.792	Granitoid	Monazite U-Pb	89.3	2.7	Tsutsumi et al., 2016
79	RPM38	S. Sikhote-Alin	43.472	133.841	Granitoid	Monazite U-Pb	101.2	1.7	Tsutsumi et al., 2016
80	RPM39	S. Sikhote-Alin	43.4336	133.867	Granitoid	Monazite U-Pb	77.3	4.1	Tsutsumi et al., 2016
81	RPM45	S. Sikhote-Alin	42.9929	133.692	Granitoid	Monazite U-Pb	105.7	11.4	Tsutsumi et al., 2016
82	RPM46	S. Sikhote-Alin	43.0549	133.554	Granitoid	Monazite U-Pb	79.1	4.8	Tsutsumi et al., 2016
83	RPM51	S. Sikhote-Alin	42.9258	133.705	Granitoid	Monazite U-Pb	83.1	7.1	Tsutsumi et al., 2016
84	RPM52	S. Sikhote-Alin	42.9265	133.745	Granitoid	Monazite U-Pb	78.8	9	Tsutsumi et al., 2016
85	RPM53	S. Sikhote-Alin	42.8797	133.706	Granitoid	Monazite U-Pb	73.4	2.9	Tsutsumi et al., 2016
86	84	Hokkaido	43	142.8	Granite	Zircon U-Pb	18.2	0.3	Jahn et al., 2014
87	85	Hokkaido	43.2	142.8	Granite	Zircon U-Pb	18.6	0.2	Jahn et al., 2014
88	86	Hokkaido	43.8	142.85	Gabbro	Zircon U-Pb	19	0.2	Jahn et al., 2014
89	87	Hokkaido	43.8	142.85	Grano-Diorite	Zircon U-Pb	19	0.2	Jahn et al., 2014
90	88	Hokkaido	43.95	142.6	Granite	Zircon U-Pb	45.7	0.5	Jahn et al., 2014
91	89	Hokkaido	43.9	143	Granite	Zircon U-Pb	44.8	0.5	Jahn et al., 2014
92	90	Hokkaido	43.85	143.15	Granite	Zircon U-Pb	37	0.5	Jahn et al., 2014
93	91	Hokkaido	44.2	142.75	Granite	Zircon U-Pb	18.5	0.2	Jahn et al., 2014
94	92	Hokkaido	45.2	143.15	Granite	Zircon U-Pb	45	0.5	Jahn et al., 2014
95	93	Hokkaido	45.2	143.15	Granite	Zircon U-Pb	45	0.5	Jahn et al., 2014
96	94	Hokkaido	44.7	142.7	Granite	Zircon U-Pb	17.9	0.3	Jahn et al., 2014
97	95	Hokkaido	44.7	142.7	Granite	Zircon U-Pb	18.2	0.2	Jahn et al., 2014
98	KH16-01		51.4671	140.444	Granodiorite	Zircon U-Pb	52.4	1.1	Wu et al., 2022, Lithos
99	KH16-03		51.465	140.474	Granodiorite	Zircon U-Pb	53.71	0.86	Wu et al., 2022, Lithos
100	KH16-04		51.4648	140.475	Granodiorite	Zircon U-Pb	54.5	1	Wu et al., 2022, Lithos
101	KH16-08		51.5042	140.033	Granodiorite	Zircon U-Pb	74.68	0.86	Wu et al., 2022, Lithos
102	KH16-09		51.5036	140.034	Basaltic Andesite	Zircon U-Pb	54.7	0.81	Wu et al., 2022, Lithos
103	KH16-10		51.5035	140.035	Granodiorite	Zircon U-Pb	76.78	0.55	Wu et al., 2022, Lithos
104	KH16-13		51.3962	139.975	Andesitic Tuff	Zircon U-Pb	75		Wu et al., 2022, Lithos
105	KH16-17		51.2941	139.72	Dacite	Zircon U-Pb	63.41	0.96	Wu et al., 2022, Lithos
106	KH16-20		51.3514	139.577	Granodiorite	Zircon U-Pb	80.37	0.88	Wu et al., 2022, Lithos
107	KH16-21		51.3536	139.575	Granodiorite	Zircon U-Pb	80.36	0.99	Wu et al., 2022, Lithos
108	KH16-22		51.3645	139.429	Granodiorite	Zircon U-Pb	84	1.2	Wu et al., 2022, Lithos
109	KH16-24		51.1953	139.177	Basaltic Andesite	Zircon U-Pb	52.52	0.38	Wu et al., 2022, Lithos
110	KH16-27		51.1408	139.216	Quartz Monzonite	Zircon U-Pb	83.93	0.78	Wu et al., 2022, Lithos
111	KH16-28		51.1467	139.207	Quartz Monzonite	Zircon U-Pb	82.21	0.8	Wu et al., 2022, Lithos
112	KH16-29		51.0845	139.153	Granodiorite	Zircon U-Pb	80.75	0.75	Wu et al., 2022, Lithos
113	KH16-31		51.1311	139.13	Granodiorite	Zircon U-Pb	84.8	2.4	Wu et al., 2022, Lithos
114	KH16-32		51.1059	138.96	Rhyolitic Tuff	Zircon U-Pb	86.95	0.89	Wu et al., 2022, Lithos
115	KH16-33		51.1188	138.994	Rhyolitic Tuff	Zircon U-Pb	83.72	0.6	Wu et al., 2022, Lithos
116	KH16-34		51.1355	139.017	Andesitic Tuff	Zircon U-Pb	85.24	0.9	Wu et al., 2022, Lithos
117	KH16-35		51.0917	139.084	Granodiorite	Zircon U-Pb	83.75	0.54	Wu et al., 2022, Lithos
118	KH16-37		51.1121	139.103	Quartz Monzonite	Zircon U-Pb	84.71	0.74	Wu et al., 2022, Lithos
119	KH16-39		51.1432	139.095	Andesitic Tuff	Zircon U-Pb	85.44	0.79	Wu et al., 2022, Lithos
120	KH16-40		51.1013	139.184	Granodiorite	Zircon U-Pb	79.74	0.84	Wu et al., 2022, Lithos
121	KH16-41		51.1029	139.173	Granodiorite	Zircon U-Pb	82.88	0.81	Wu et al., 2022, Lithos
122	KH16-43		51.0888	138.739	Dacite	Zircon U-Pb	84.6	1.1	Wu et al., 2022, Lithos
123	KH16-53		50.2849	137.787	Quartz Monzodiorite	Zircon U-Pb	52.14	0.41	Wu et al., 2022, Lithos
124	KH16-55		50.0021	137.934	Granite	Zircon U-Pb	72.3	2.1	Wu et al., 2022, Lithos
125	KH16-56		49.981	137.924	Granite	Zircon U-Pb	110.45	0.93	Wu et al., 2022, Lithos
126	KH16-60		49.769	138.365	Granodiorite	Zircon U-Pb	125.7	1.2	Wu et al., 2022, Lithos
127	KH16-64		49.6146	138.478	Granite	Zircon U-Pb	109.4	1.9	Wu et al., 2022, Lithos
128	KH16-67		49.8793	138.177	Granite	Zircon U-Pb	108.3	1.3	Wu et al., 2022, Lithos
129	KH16-68		49.9241	137.973	Quartz Monzodiorite	Zircon U-Pb	73.98	0.95	Wu et al., 2022, Lithos
130	KH16-69		49.9428	137.935	Granite	Zircon U-Pb	73	0.43	Wu et al., 2022, Lithos
131	KH16-71		50.1231	138.022	Granite	Zircon U-Pb	70.47	0.91	Wu et al., 2022, Lithos
132	KH16-72		50.0771	137.966	Granodiorite	Zircon U-Pb	123.89	0.87	Wu et al., 2022, Lithos
133	KH16-73		50.0831	137.964	Granite	Zircon U-Pb	74.3	1.3	Wu et al., 2022, Lithos
134	KH16-76		50.2709	138.505	Granite	Zircon U-Pb	73.3	0.76	Wu et al., 2022, Lithos
135	KH16-77		50.2515	138.529	Granite	Zircon U-Pb	71.62	0.83	Wu et al., 2022, Lithos
136	KH16-81a		50.1941	139.011	Basaltic Andesite	Zircon U-Pb	108		Wu et al., 2022, Lithos
137	KH16-81b		50.1941	139.011	Basaltic Andesite	Zircon U-Pb	75.58	0.94	Wu et al., 2022, Lithos
138	KH16-82		50.1901	139.101	Basalt	Zircon U-Pb	72.1	1.2	Wu et al., 2022, Lithos
139	KH16-84		50.1611	140.505	Monzodiorite	Zircon U-Pb	62		Wu et al., 2022, Lithos
140	KH16-85		50.16	140.505	Quartz Monzodiorite	Zircon U-Pb	75.6	0.62	Wu et al., 2022, Lithos
141	KH16-86		50.1582	140.506	Granodiorite	Zircon U-Pb	63		Wu et al., 2022, Lithos
142	KH16-88		50.0934	140.672	Quartz Monzodiorite	Zircon U-Pb	66.18	0.87	Wu et al., 2022, Lithos
143	KH16-89		50.0959	140.672	Granodiorite	Zircon U-Pb	87.42	0.87	Wu et al., 2022, Lithos
144	KH16-92		50.759	140.018	Granite	Zircon U-Pb	78.5	2	Wu et al., 2022, Lithos
145	KH16-93		50.754	140.02	Granite	Zircon U-Pb	53.86	0.58	Wu et al., 2022, Lithos
146	KH16-97		50.5403	139.331	Tuff Breccia	Zircon U-Pb	63.05	0.5	Wu et al., 2022, Lithos
147	KH16-98		50.5564	139.22	Granite	Zircon U-Pb	70.7	0.54	Wu et al., 2022, Lithos
148	KH16-99a		50.38	139.333	Quartz Monzodiorite	Zircon U-Pb	81.68	0.51	Wu et al., 2022, Lithos
149	KH16-102a		49.9681	139.04	Granite	Zircon U-Pb	71.6	1.3	Wu et al., 2022, Lithos
150	KH16-102b		49.9681	139.04	Granite	Zircon U-Pb	122.3	2	Wu et al., 2022, Lithos
151	KH16-103a		49.3875	137.681	Diorite	Zircon U-Pb	52.1	1.5	Wu et al., 2022, Lithos
152	KH16-103b		49.3885	137.68	Granite	Zircon U-Pb	109.3	1.7	Wu et al., 2022, Lithos
153	KH16-103c		49.3885	137.68	Granite	Zircon U-Pb	106.21	0.61	Wu et al., 2022, Lithos
154	KH16-105a		49.354	137.797	Granite	Zircon U-Pb	107.77	0.92	Wu et al., 2022, Lithos
155	KH16-105b		49.354	137.797	Granodiorite	Zircon U-Pb	107.87	0.77	Wu et al., 2022, Lithos
156	KH16-107		49.2971	137.943	Granite	Zircon U-Pb	57.6	1.2	Wu et al., 2022, Lithos
157	KH16-110		49.2512	138.193	Granite	Zircon U-Pb	106.62	0.96	Wu et al., 2022, Lithos
158	KH16-111		49.3119	138.545	Tuff	Zircon U-Pb	53.5	0.52	Wu et al., 2022, Lithos
159	KH16-114a		49.2722	138.831	Granite	Zircon U-Pb	108.6	1.2	Wu et al., 2022, Lithos
160	KH16-114b		49.2722	138.831	Rhyolite	Zircon U-Pb	58.56	0.47	Wu et al., 2022, Lithos
161	KH16-116a		49.1515	139.209	Granite	Zircon U-Pb	84.04	0.65	Wu et al., 2022, Lithos
162	KH16-116b		49.1515	139.209	Granite	Zircon U-Pb	83.62	0.67	Wu et al., 2022, Lithos
163	KH16-118		48.8857	140.261	Diorite	Zircon U-Pb	59.9	1.4	Wu et al., 2022, Lithos
164	KH16-119		48.5135	139.588	Granodiorite	Zircon U-Pb	59.6	1.1	Wu et al., 2022, Lithos
165	KH16-120		48.4767	139.539	Granite	Zircon U-Pb	59.19	0.78	Wu et al., 2022, Lithos
166	KH16-122		48.4677	139.441	Granodiorite	Zircon U-Pb	62.47	0.54	Wu et al., 2022, Lithos
167	KH16-123		48.4667	139.526	Granite	Zircon U-Pb	59.86	0.59	Wu et al., 2022, Lithos
168	KH16-124		48.6832	139.557	Granodiorite	Zircon U-Pb	60.1	1.1	Wu et al., 2022, Lithos
169	KH16-126		48.8719	139.614	Granite	Zircon U-Pb	66.75	0.89	Wu et al., 2022, Lithos
170	KH16-127		48.8785	139.725	Granodiorite	Zircon U-Pb	63.6	2.2	Wu et al., 2022, Lithos
171	KH16-128		49.6497	139.979	Granite	Zircon U-Pb	52.58	0.6	Wu et al., 2022, Lithos
172	KH16-129		49.6476	139.984	Granodiorite	Zircon U-Pb	82.4	1.9	Wu et al., 2022, Lithos
173	P15-13		46.426	137.765	Basalt	Zircon U-Pb	65		Wu et al., 2022, Lithos
174	P15-20		46.2344	137.773	Quartz Monzodiorite	Zircon U-Pb	40.4	1.5	Wu et al., 2022, Lithos
175	P15-30		45.0155	136.571	Granodiorite	Zircon U-Pb	67.9	0.71	Wu et al., 2022, Lithos
176	P16-01		47.1778	138.29	Rhyolitic Tuff	Zircon U-Pb	53.01	0.49	Wu et al., 2022, Lithos
177	P16-02		47.1943	138.214	Basaltic Andesite	Zircon U-Pb	62		Wu et al., 2022, Lithos
178	P16-04		47.0676	137.92	Granodiorite	Zircon U-Pb	75.89	0.6	Wu et al., 2022, Lithos
179	P16-05		46.9762	137.874	Porphyritic Rhyolite	Zircon U-Pb	89.79	0.59	Wu et al., 2022, Lithos
180	P16-06		46.9444	137.808	Porphyritic Andesite	Zircon U-Pb	91.56	0.92	Wu et al., 2022, Lithos
181	P16-07		46.8995	137.789	Granodiorite	Zircon U-Pb	90.8	1	Wu et al., 2022, Lithos
182	P16-08		46.6274	138.263	Granite	Zircon U-Pb	58.75	0.57	Wu et al., 2022, Lithos
183	P16-09		46.5462	138.328	Granite	Zircon U-Pb	58.44	0.68	Wu et al., 2022, Lithos
184	P16-16		46.4569	137.93	Granite	Zircon U-Pb	63.59	0.59	Wu et al., 2022, Lithos
185	P16-17		46.4651	137.818	Porphyritic Granite	Zircon U-Pb	55.3	1.6	Wu et al., 2022, Lithos
186	P16-18		46.2295	137.773	Granodiorite	Zircon U-Pb	43		Wu et al., 2022, Lithos
187	P16-19		45.9318	137.691	Porphyritic Rhyolite	Zircon U-Pb	66.32	0.45	Wu et al., 2022, Lithos
188	P16-22		45.9751	137.381	Rhyolitic Tuff	Zircon U-Pb	54.05	0.52	Wu et al., 2022, Lithos
189	P16-25		45.7632	136.77	Basalt	Zircon U-Pb	65		Wu et al., 2022, Lithos
190	P16-28		45.053	136.513	Rhyolite	Zircon U-Pb	86.8	0.76	Wu et al., 2022, Lithos
191	FW04-213	Nadanhada Terrane	46.7589	133.847	Gabbro	LA-ICPMS	166	1	Cheng et al., 2006
192	FW04-239	Nadanhada Terrane	46.8144	133.847	Granodiorite	LA-ICPMS	124	1	Cheng et al., 2006
193	FW04-244	Nadanhada Terrane	46.7756	133.824	Syenogranite	LA-ICPMS	111	1	Cheng et al., 2006
194	FW04-246	Nadanhada Terrane	46.7253	133.88	Syenogranite	LA-ICPMS	114	1	Cheng et al., 2006
195	FW04-251	Nadanhada Terrane	46.9119	133.74	Granodiorite	LA-ICPMS	124	1	Cheng et al., 2006
196	FW04-254	Nadanhada Terrane	47.0767	133.896	Granodiorite	LA-ICPMS	114	1	Cheng et al., 2006
197	FW04-257	Nadanhada Terrane	47.0767	133.896	Granodiorite	LA-ICPMS	116	1	Cheng et al., 2006
198	FW04-272	Nadanhada Terrane	45.8	132.921	Granodiorite	LA-ICPMS	112	1	Wilde et al., 2010

## Sheet: Japan (JP)
Order	Sample.No	Location	Latitude (N)	Longitude (E)	Age (Ma)		Reference
					206Pb/238U or 207Pb/206Pb	Error
1	GY88A		35.0338	137.34	98.9	0.9	Takatsuka et al., 2017--Island Arc
2	GY90A		35.0204	137.364	99.4	0.9	Takatsuka et al., 2017--Island Arc
3	GY98A		35.0609	137.539	94.7	0.7	Takatsuka et al., 2017--Island Arc
4	GY33A		34.8312	137.283	77.6	0.6	Takatsuka et al., 2017--Island Arc
5	GY48D		34.8884	137.449	77.1	0.6	Takatsuka et al., 2017--Island Arc
6	GY80D		34.8073	137.162	81.1	1	Takatsuka et al., 2017--Island Arc
7	GY81B		34.804	137.155	81.1	1	Takatsuka et al., 2017--Island Arc
8	2012092801	Leucogranite	36.8348	140.483	100.6	0.9	Takahashi et al., 2016--Island Arc
9	TH-007	Biotite granodioriite	36.7753	140.664	104.5	0.8	Takahashi et al., 2016--Island Arc
10	2012112007	Hanawa Pluton	36.9439	140.463	105.1	1	Takahashi et al., 2016--Island Arc
11	TH-014	Irishiken Pluton	36.6357	140.582	105.3	0.8	Takahashi et al., 2016--Island Arc
12	TH-223	Kamikimita Pluton	36.7756	140.57	105.2	0.8	Takahashi et al., 2016--Island Arc
13	2012111601	Tabito Pluton	36.9453	140.697	112.6	1	Takahashi et al., 2016--Island Arc
14	2012111909	Ishikawa Pluton	37.1461	140.461	104.2	0.7	Takahashi et al., 2016--Island Arc
15	2012111706	Miyamoto Pluton	37.0621	140.576	106.5	0.9	Takahashi et al., 2016--Island Arc
16	TH-026	Fine-grained Diorite	36.8523	140.609	101	0.6	Takahashi et al., 2016--Island Arc
17	2012112005		36.886	140.609	109	1.1	Takahashi et al., 2016--Island Arc
18	TH-608		36.8406	140.739	102.7	0.8	Takahashi et al., 2016--Island Arc
19	2012111704		37.1261	140.643	112.4	1	Takahashi et al., 2016--Island Arc
20	EY106A		34.1187	132.173	95.6	1	Skrzypek et al., 2016--Lithos
21	EY54M		34.1244	132.153	96.4	1	Skrzypek et al., 2016--Lithos
22	EY42M		34.0946	132.166	94	3	Skrzypek et al., 2016--Lithos
23	EY99A		34.1186	132.133	105	3	Skrzypek et al., 2016--Lithos
24	EY139A		34.0909	132.112	100.6	1	Skrzypek et al., 2016--Lithos
25	EY117A		34.0811	132.145	105	2	Skrzypek et al., 2016--Lithos
26	EY135A		34.067	132.197	98	1	Skrzypek et al., 2016--Lithos
27	EY137A		34.0629	132.159	97.6	1	Skrzypek et al., 2016--Lithos
28	EY136A		34.0753	132.176	94.7	1	Skrzypek et al., 2016--Lithos
29	EY124A		33.9718	132.172	100	1	Skrzypek et al., 2016--Lithos
30	EY86M		33.8734	132.142	98.4	1	Skrzypek et al., 2016--Lithos
31	EY38M		33.8864	132.192	93.8	1	Skrzypek et al., 2016--Lithos
32	KTKM-01		39.9879	141.805	121.7	1.2	Osozawa et al., 2019--JAES
33	KTKM-02		40.0085	141.916	122.5	1.2	Osozawa et al., 2019--JAES
34	KTKM-03		39.6911	141.978	123.5	1.6	Osozawa et al., 2019--JAES
35	KTKM-04		39.3275	141.531	118	1.2	Osozawa et al., 2019--JAES
36	KTKM-05		38.9761	141.143	113.1	1.2	Osozawa et al., 2019--JAES
37	KTKM-06		39.8214	141.283	120.6	1.2	Osozawa et al., 2019--JAES
38	KTKM-07		39.8214	141.283	121.4	1.3	Osozawa et al., 2019--JAES
39	KTKM-08		40.0449	141.539	126.8	1.3	Osozawa et al., 2019--JAES
40	KTKM-09		39.7538	141.648	129.6	2	Osozawa et al., 2019--JAES
41	KTKM-10		39.9879	141.805	124.5	1.1	Osozawa et al., 2019--JAES
42	KTKM-11		40.1414	141.636	124.3	1.6	Osozawa et al., 2019--JAES
43	KTKM-12		39.7321	141.978	124.2	1.6	Osozawa et al., 2019--JAES
44	KTKM-13		39.5696	141.981	124.2	1.7	Osozawa et al., 2019--JAES
45	KTKM-14		39.5408	142.006	123.2	2	Osozawa et al., 2019--JAES
46	KTKM-15		39.7279	141.786	123.1	1.8	Osozawa et al., 2019--JAES
47	KTKM-16		39.4157	141.982	120.9	2.1	Osozawa et al., 2019--JAES
48	KTKM-17		39.4414	141.951	119.2	1.2	Osozawa et al., 2019--JAES
49	KTKM-18		39.1033	141.873	121.7	1	Osozawa et al., 2019--JAES
50	KTKM-21		39.0318	141.633	122.1	1.3	Osozawa et al., 2019--JAES
51	KTKM-22		38.9708	141.702	121.8	1.1	Osozawa et al., 2019--JAES
52	KTKM-23		39.3139	141.318	114.4	1.1	Osozawa et al., 2019--JAES
53	KTKM-24		39.9247	141.376	121.6	2.3	Osozawa et al., 2019--JAES
54	KTKM-25		38.8917	141.47	111.5	2.8	Osozawa et al., 2019--JAES
55	KTKM-26		38.8917	141.47	119	1.9	Osozawa et al., 2019--JAES
56	KTKM-27		39.1033	141.873	120	2	Osozawa et al., 2019--JAES
57	KTKM-28		39.1033	141.873	125.5	2.4	Osozawa et al., 2019--JAES
58	BJ-13-102		40.1752	141.845	123.3	1.1	Osozawa et al., 2019--JAES
59	BJ-13-101		40.0756	141.653	122.7	1.2	Osozawa et al., 2019--JAES
60	BJ-13-107		38.9841	141.641	124.9	1.2	Osozawa et al., 2019--JAES

[truncated: 1 more sheets: Korea Pennisula (KP)]
