# Supplementary material for: High-elevation orogenic plateau influences ecosystems
Source: Research Square preprint supplement (doi:10.21203/rs.3.rs-5816615/v1), 2025-01-23
Supplement: Supplementary file 7 [file fdda99c943147e9f6003ddbc.xlsx]

## Sheet: Sheet1
Number	Age	Error	Rock type	Mineral	Method	Formation	Locality		Reference
Yanliao Biota
1	163.7	1.1	Tuff	Zircon	SIMS U-Pb	Haifanggou	Yanshan Mountains	Daohugou region	Yu et al., 2023--Earth and Planetary Science Letters
2	163.4	1.2	Tuff	Zircon	SIMS U-Pb	Haifanggou	Yanshan Mountains	Wubaiding section	Yu et al., 2023--Earth and Planetary Science Letters
3	162.8	1.2	Tuff	Zircon	SIMS U-Pb	Haifanggou	Yanshan Mountains	Wubaiding section	Yu et al., 2023--Earth and Planetary Science Letters
4	162.3	1.3	Tuff	Zircon	SIMS U-Pb	Tiaojishan	Yanshan Mountains	Haifenggou section	Yu et al., 2023--Earth and Planetary Science Letters
5	163.9	1.3	Tuff	Zircon	SIMS U-Pb	Haifanggou	Yanshan Mountains	Haifenggou section	Yu et al., 2023--Earth and Planetary Science Letters
6	163.3	0.1	Tuff	Zircon	CA-ID-IRMS U-Pb	Haifanggou	Yanshan Mountains	Daohugou region	Yu et al., 2023--Earth and Planetary Science Letters
7	158.6	0.2	Tuff	Zircon	CA-ID-IRMS U-Pb	Tiaojishan	Yanshan Mountains	Nanshimen section	Yu et al., 2023--Earth and Planetary Science Letters
8	161.6	0.6	Tuff	Sanidines	40Ar/39Ar	Tiaojishan	Yanshan Mountains	Reshuitang section	Li et al., 2023--Palaeogeography, Palaeoclimatology, Palaeoecology
9	161.4	0.8	Tuff	Sanidines	40Ar/39Ar	Tiaojishan	Yanshan Mountains	Reshuitang section	Li et al., 2023--Palaeogeography, Palaeoclimatology, Palaeoecology
10	159.0	1.1	Bentonite	Zircon	SIMS U-Pb	Tiaojishan	Yanshan Mountains	Bawanggou section	Yu et al., 2021--International Geology Review
11	159.5	0.8	Bentonite	Zircon	SIMS U-Pb	Tiaojishan	Yanshan Mountains	Bawanggou section	Yu et al., 2021--International Geology Review
12	159.8	0.8	Bentonite	Zircon	SIMS U-Pb	Tiaojishan	Yanshan Mountains	Bawanggou section	Yu et al., 2021--International Geology Review
13	160.25	0.05	Tuff	Zircon	CA-ID-TIMS U-Pb	Lanqi	Yanshan Mountains	Daxishan section, Linglongta region	Chu et al., 2016--Geochemistry, Geophysics, Geosystems
14	160.38	0.06	Tuff	Zircon	CA-ID-TIMS U-Pb	Lanqi	Yanshan Mountains	Daxishan section, Linglongta region	Chu et al., 2016--Geochemistry, Geophysics, Geosystems
15	160.89	0.07	Tuff	Zircon	CA-ID-TIMS U-Pb	Lanqi	Yanshan Mountains	Daxishan section, Linglongta region	Chu et al., 2016--Geochemistry, Geophysics, Geosystems
16	158.9	1.7	Tuff	Zircon	SIMS U-Pb	Lanqi	Yanshan Mountains	Daxishan section, Linglongta region	Wang et al., 2013--China Science Bulletin (In Chinese with English abstract)
17	159.5	2.3	Tuff	Zircon	SIMS U-Pb	Lanqi	Yanshan Mountains	Daxishan section, Linglongta region	Wang et al., 2013--China Science Bulletin (In Chinese with English abstract)
18	160.7	1.7	Tuff	Zircon	SIMS U-Pb	Lanqi	Yanshan Mountains	Daxishan section, Linglongta region	Wang et al., 2013--China Science Bulletin (In Chinese with English abstract)
19	158.5	1.6	Dacite	Zircon	SHRIMP U-Pb	Lanqi	Yanshan Mountains	Yaolugou section	Liu et al., 2012--Palaeogeography, Palaeoclimatology, Palaeoecology
20	161.0	1.4	Tuff	Zircon	SHRIMP U-Pb	Lanqi	Yanshan Mountains	Daxishan section, Linglongta region	Liu et al., 2012--Palaeogeography, Palaeoclimatology, Palaeoecology
21	160.5	1.0	Tuff	Zircon	SHRIMP U-Pb	Lanqi	Yanshan Mountains	Daxishan section, Linglongta region	Liu et al., 2012--Palaeogeography, Palaeoclimatology, Palaeoecology
22	159.7	2.1	Rhyolite	Zircon	SHRIMP U-Pb	Tiaojishan	Yanshan Mountains	Jiangzhangji section	Meng, 2008--Northeast University
23	152.0	3.0	Trachyandesite	Zircon	SHRIMP U-Pb	Tiaojishan	Yanshan Mountains	Xiaoxigou-Xiaolianqian	Liu et al., 2006--Chinese Science Bulletin
24	162.0	2.0	Trachyandesite	Zircon	SHRIMP U-Pb	Tiaojishan	Yanshan Mountains	Qiaomailiangyakou-Daohugou	Liu et al., 2006--Chinese Science Bulletin
25	164.0	4.0	Rhyolite	Zircon	SHRIMP U-Pb	Tiaojishan	Yanshan Mountains	Reshuitang section	Liu et al., 2006--Chinese Science Bulletin
26	157.0	3.0	Rhyolite	Zircon	SHRIMP U-Pb	Tiaojishan	Yanshan Mountains	Reshuitang section	Liu et al., 2006--Chinese Science Bulletin
27	164.0	5.1	Trachyandesite	Zircon	LA-ICPMS	Tiaojishan	Yanshan Mountains	Xiaoxigou-Xiaolianqian	Liu et al., 2006--Acta Geologica Sinica
28	170.0	2.3	Trachyandesite	Zircon	LA-ICPMS		Yanshan Mountains	Qiaomailiangyakou-Daohugou	Liu et al., 2006--Acta Geologica Sinica
29	158.4	4.1	Trachyandesite	Zircon	LA-ICPMS	Tiaojishan	Yanshan Mountains	Zhujiagou	Liu et al., 2006--Acta Geologica Sinica
30	166.0	3.5	Liparite	Zircon	LA-ICPMS	Tiaojishan	Yanshan Mountains	Reshuitang section	Liu et al., 2006--Acta Geologica Sinica
31	161.7	3.3	Liparite	Zircon	LA-ICPMS	Tiaojishan	Yanshan Mountains	Reshuitang section	Liu et al., 2006--Acta Geologica Sinica
32	163.5	8.9	Rhyolite	Zircon	LA-ICPMS	Tiaojishan	Yanshan Mountains	Reshuitang section	Liu et al., 2006--Acta Geologica Sinica
33	161.7	4.4	Tuff	Zircon	LA-ICPMS	Tiaojishan	Yanshan Mountains	Sandaogou-Guancaishan	Liu et al., 2006--Acta Geologica Sinica
34	164.2	2.5	Welded tuff	Sanidine	40Ar/39Ar	Tiaojishan	Yanshan Mountains	Daohugou region	Chen et al., 2004--Geological Bulletin of China (In Chinese with English abstract)
35	164.6	2.4	Welded tuff	Zircon	SHRIMP U-Pb	Tiaojishan	Yanshan Mountains	Daohugou region	Chen et al., 2004--Geological Bulletin of China (In Chinese with English abstract)
36	165.5	21.5	Trachyte	Zircon	SHRIMP U-Pb	Tiaojishan	Yanshan Mountains	Daohugou region	Chen et al., 2004--Geological Bulletin of China (In Chinese with English abstract)
37	161.4	0.6	Rhyolitic lava	Biotite	40Ar/39Ar	Tiaojishan	Yanshan Mountains	Daohugou region	Ji, 2004--Geological Publishing House
38	159.2	2.2	Rhyolitic lava	Feldspar	40Ar/39Ar	Tiaojishan	Yanshan Mountains	Daohugou region	Ji, 2004--Geological Publishing House
39	159.9	3.2	Rhyolitic lava	Zircon	SHRIMP U-Pb	Tiaojishan	Yanshan Mountains	Daohugou region	Ji, 2004--Geological Publishing House
40	160.4	0.8	Ignimbrite	K-feldspar	40Ar/39Ar		Yanshan Mountains	Daohugou region	He et al., 2004--Geophysical Research Letters
41	163.4	1.5	Tuff	Zircon	SIMS U-Pb	Tiaoji-Haifang	Yanshan Mountains	Sanshengjiebei	Zou et al., 2024--GSA Bulletin
42	160.3	2.4	Breccia tuff	Zircon	SIMS U-Pb	Tiaoji-Haifang	Yanshan Mountains	Sanshengjiebei	Zou et al., 2024--GSA Bulletin
43	161.6	1.3	Andesite	Zircon	SIMS U-Pb	Tiaoji-Haifang	Yanshan Mountains	Jiangzhangzi	Zou et al., 2024--GSA Bulletin
44	161.5	3.1	Breccia tuff	Zircon	SIMS U-Pb	Tiaoji-Haifang	Yanshan Mountains	Guancaishan	Zou et al., 2024--GSA Bulletin
45	159.1	1.9	Sedimentary tuff	Zircon	SIMS U-Pb	Tiaoji-Haifang	Yanshan Mountains	Guancaishan	Zou et al., 2024--GSA Bulletin
46	155.9	1.5	Tuff	Zircon	SIMS U-Pb	Tiaoji-Haifang	Yanshan Mountains	Guancaishan	Zou et al., 2024--GSA Bulletin
47	158.3	1.4	Tuff	Zircon	SIMS U-Pb	Tiaoji-Haifang	Yanshan Mountains	Maxigouli-Xiangyangshancun	Zou et al., 2024--GSA Bulletin
Jehol Biota
1	115.6	1.1	Tephra	Zircon	LA-ICP-MS	Chengzihe	Jixi Basin	Chengzihe district	Chen et al., 2018--Palaeogeography, Palaeoclimatology, Palaeoecology
2	111.0	0.6	Tephra	Zircon	LA-ICP-MS	Chengzihe	Jixi Basin	Chengzihe district	Chen et al., 2018--Palaeogeography, Palaeoclimatology, Palaeoecology
3	99.9	0.4	Andesite	Plagioclases	40Ar/39Ar	Lishugou	Liaodong Peninsula	Dandong city	Chang et al., 2014--Palaeogeography, Palaeoclimatology, Palaeoecology
4	109.1	0.2	Andesite	Plagioclases	40Ar/39Ar	Xiaolin	Liaodong Peninsula	Dandong city	Chang et al., 2014--Palaeogeography, Palaeoclimatology, Palaeoecology
5	122.4	0.2	Rhyolite	Plagioclases	40Ar/39Ar	Xiaolin	Liaodong Peninsula	Dandong city	Chang et al., 2014--Palaeogeography, Palaeoclimatology, Palaeoecology
6	121.6	0.5	Tuff	Zircon	LA-ICP-MS	Jiufengshan	Great Xing'an Range	Nakata setion	Li et al., 2020--Palaeogeography, Palaeoclimatology, Palaeoecology
7	124.3	1.5	Tuff	Zircon	LA-ICP-MS	Jiufengshan	Great Xing'an Range	Nakata setion	Li et al., 2023--Palaeogeography, Palaeoclimatology, Palaeoecology
8	124.9	1.6	Tuffaceous sandstone	Zircon	LA-ICP-MS	Jiufengshan	Great Xing'an Range	Nakata setion	Li et al., 2023--Palaeogeography, Palaeoclimatology, Palaeoecology
9	121.5	1.4	Tuff	Zircon	LA-ICP-MS	Jiufengshan	Great Xing'an Range	Nakata setion	Li et al., 2023--Palaeogeography, Palaeoclimatology, Palaeoecology
10	117.7	1.0	Tuff	Zircon	SIMS U-Pb	Longjiang	Great Xing'an Range	Jiaxikou	Yu et al., 2022--Palaeogeography, Palaeoclimatology, Palaeoecology
11	118.7	0.1	Tuff	Zircon	CA-ID-IRMS U-Pb	Longjiang	Great Xing'an Range	Jiaxikou	Yu et al., 2022--Palaeogeography, Palaeoclimatology, Palaeoecology
12	118.3	1.2	Tuff	Zircon	SIMS U-Pb	Longjiang	Great Xing'an Range	Jiaxikou	Yu et al., 2022--Palaeogeography, Palaeoclimatology, Palaeoecology
13	117.8	0.9	Tuff	Zircon	SIMS U-Pb	Longjiang	Great Xing'an Range	Gezidong	Yu et al., 2022--Palaeogeography, Palaeoclimatology, Palaeoecology
14	119.2	0.4	Tuff	Zircon	CA-ID-IRMS U-Pb	Longjiang	Great Xing'an Range	Gezidong	Yu et al., 2022--Palaeogeography, Palaeoclimatology, Palaeoecology
15	121.2	0.7	Tuff	Zircon	LA-ICP-MS U-Pb	Longjiang	Great Xing'an Range	Pigeon Hill	Wang et al., 2019--Acta Geologica Sinica
16	128.5	1.0	Tuff	Zircon	SIMS U-Pb	Yingzuilazi	Baishan Basin	Baishan Basin	Wang et al., 2022--Cretaceous Research
17	128.8	0.2	Rhyolite	Sanidines	40Ar/39Ar	Longwanshan	Anhui Province	Anhui Province	Chang et al., 2012--Palaeogeography, Palaeoclimatology, Palaeoecology
18	127.1	1.3	Dacite	Plagioclase	40Ar/39Ar	Honghuaqiao	Anhui Province	Anhui Province	Chang et al., 2012--Palaeogeography, Palaeoclimatology, Palaeoecology
19	128.0	0.9	Breccia	Plagioclase	40Ar/39Ar	Honghuaqiao	Anhui Province	Anhui Province	Chang et al., 2012--Palaeogeography, Palaeoclimatology, Palaeoecology
20	122.3	0.5	Diabase		40Ar/39Ar	Yixian	Yanshan Mountains	Sihetun	Wang et al., 2001--Acta Petrologica Sinica (In Chinese with English abstract)
21	128.2	0.8	Basalt-andesite		40Ar/39Ar	Yixian	Yanshan Mountains	Sihetun	Wang et al., 2001--Acta Petrologica Sinica (In Chinese with English abstract)
22	123.7	0.9	Volcanic rocks		40Ar/39Ar	Yixian	Yanshan Mountains	Sihetun	Zhu et al., 2007--Cretaceous Research
23	126.0	1.0	Volcanic rocks		40Ar/39Ar	Yixian	Yanshan Mountains	Sihetun	Zhu et al., 2007--Cretaceous Research
24	125.5	0.3	Tuff	Sanidine	40Ar/39Ar	Yixian	Yanshan Mountains	Lujiatun	Li et al., 2022--Earth and Planetary Science Letters
25	125.8	0.3	Tuff	Sanidine	40Ar/39Ar	Yixian	Yanshan Mountains	Lujiatun	Li et al., 2022--Earth and Planetary Science Letters
26	125.2	0.3	Tuff	Sanidine	40Ar/39Ar	Yixian	Yanshan Mountains	Jianshangou	Li et al., 2022--Earth and Planetary Science Letters
27	125.4	0.2	Tuff	Sanidine	40Ar/39Ar	Yixian	Yanshan Mountains	Jianshangou	Li et al., 2022--Earth and Planetary Science Letters
28	125.4	0.2	Tuff	Sanidine	40Ar/39Ar	Yixian	Yanshan Mountains	Jianshangou	Li et al., 2022--Earth and Planetary Science Letters
29	125.4	0.2	Tuff	Sanidine	40Ar/39Ar	Yixian	Yanshan Mountains	Jianshangou	Li et al., 2022--Earth and Planetary Science Letters
30	125.6	0.3	Tuff	Sanidine	40Ar/39Ar	Yixian	Yanshan Mountains	Jianshangou	Li et al., 2022--Earth and Planetary Science Letters
31	125.5	0.3	Tuff	Zircon	U-Pb CA-ID-IRMS	Yixian	Yanshan Mountains	Jianshangou	Zhong et al., 2021--National Science Review
32	125.7	0.3	Tuff	Zircon	U-Pb CA-ID-IRMS	Yixian	Yanshan Mountains	Lujiatun	Zhong et al., 2021--National Science Review
33	125.8	0.3	Tuff	Zircon	U-Pb CA-ID-IRMS	Yixian	Yanshan Mountains	Lujiatun	Zhong et al., 2021--National Science Review
34	124.1	1.5	Tuff	K-feldspar	40Ar/39Ar	Yixian	Yanshan Mountains	Lujiatun	He et al., 2006--Geophysical Research Letters
35	124.3	1.7	Tuff	K-feldspar	40Ar/39Ar	Yixian	Yanshan Mountains	Lujiatun	He et al., 2006--Geophysical Research Letters
36	122.8	1.6	Tuff	Zircon	SHRIMP U-Pb	Yixian	Yanshan Mountains	Huangbanjigou	Yang et al., 2007--Cretaceous Research
37	124.7	2.7	Tuff	Zircon	SHRIMP U-Pb	Yixian	Yanshan Mountains	Sihetun	Yang et al., 2007--Cretaceous Research
38	124.9	1.7	Tuff	Zircon	SHRIMP U-Pb	Yixian	Yanshan Mountains	Huangbanjigou	Yang et al., 2007--Cretaceous Research
39	124.6	0.3	Tuff	Sanidine	40Ar/39Ar	Yixian	Yanshan Mountains	Sihetun	Swisher et al., 1999--Nature
40	124.6	0.2	Tuff	Sanidine	40Ar/39Ar	Yixian	Yanshan Mountains	Jianshangou	Swisher et al., 1999--Nature
41	124.6	0.1	Tuff	Sanidine	40Ar/39Ar	Yixian	Yanshan Mountains	Jianshangou	Swisher et al., 1999--Nature
42	125.8	0.8	Tuff	Sanidine	40Ar/39Ar	Yixian	Yanshan Mountains	Sihetun	Swisher et al., 2002--Chinese Science Bulletin
43	125.8	1.0	Basalt	Groundmass	40Ar/39Ar	Yixian	Yanshan Mountains	Lujiatun	Chang et al., 2017--Palaeogeography, Palaeoclimatology, Palaeoecology
44	126.0	0.8	Basalt	Groundmass	40Ar/39Ar	Yixian	Yanshan Mountains	Lujiatun	Chang et al., 2017--Palaeogeography, Palaeoclimatology, Palaeoecology
45	126.4	0.5	Basalt	Groundmass	40Ar/39Ar	Yixian	Yanshan Mountains	Miaogou	Chang et al., 2009--Palaeogeography, Palaeoclimatology, Palaeoecology
46	129.7	0.5	Basalt	Groundmass	40Ar/39Ar	Yixian	Yanshan Mountains	Huangbanjigou	Chang et al., 2009--Palaeogeography, Palaeoclimatology, Palaeoecology
47	123.8	0.5	Tuff	Sanidine	40Ar/39Ar	Yixian	Yanshan Mountains	Sihetun	Chang et al., 2009--Palaeogeography, Palaeoclimatology, Palaeoecology
48	124.1	0.9	Tuff	Sanidine	40Ar/39Ar	Yixian	Yanshan Mountains	Huangbanjigou	Chang et al., 2009--Palaeogeography, Palaeoclimatology, Palaeoecology
49	122.2	0.4	Tuff	Sanidine	40Ar/39Ar	Jiufotang	Yanshan Mountains	Pijiagou	Chang et al., 2009--Palaeogeography, Palaeoclimatology, Palaeoecology
50	120.1	0.4	Tuff	K-feldspar	40Ar/39Ar	Jiufotang	Yanshan Mountains	Shangheshou	He et al., 2004--Geophysical Research Letters
51	120.1	0.5	Tuff	K-feldspar	40Ar/39Ar	Jiufotang	Yanshan Mountains	Shangheshou	He et al., 2004--Geophysical Research Letters
52	122.0	0.9	Tuff	Zircon	SIMS U-Pb	Jiufotang	Yanshan Mountains	Sanmendian section	Yu et al., 2021--Palaeogeography, Palaeoclimatology, Palaeoecology
53	118.9	0.8	Tuff	Zircon	SIMS U-Pb	Jiufotang	Yanshan Mountains	Xiaotaizi section	Yu et al., 2021--Palaeogeography, Palaeoclimatology, Palaeoecology
54	118.8	0.8	Tuff	Zircon	SIMS U-Pb	Jiufotang	Yanshan Mountains	Xiaotaizi section	Yu et al., 2021--Palaeogeography, Palaeoclimatology, Palaeoecology
55	118.6	1.1	Tuff	Zircon	SIMS U-Pb	Jiufotang	Yanshan Mountains	Xiaotaizi section	Yu et al., 2021--Palaeogeography, Palaeoclimatology, Palaeoecology
56	128.7	0.8	Tuff	Zircon	SIMS U-Pb	Huajiying	Sichakou Basin	Youfang section	Yang et al., 2020--Proceedings of the National Academy of Sciences of the United States of America
57	128.8	0.7	Tuff	Zircon	SIMS U-Pb	Huajiying	Sichakou Basin	Youfang section	Yang et al., 2020--Proceedings of the National Academy of Sciences of the United States of America
58	130.3	0.8	Tuff	Zircon	SIMS U-Pb	Huajiying	Sichakou Basin	Youfang section	Yang et al., 2020--Proceedings of the National Academy of Sciences of the United States of America
59	132.5	2.9	Tuff	Zircon	SIMS U-Pb	Huajiying	Sichakou Basin	Youfang section	Yang et al., 2020--Proceedings of the National Academy of Sciences of the United States of America
60	129.6	1.2	Tuff	Zircon	SIMS U-Pb	Huajiying	Sichakou Basin	Tuanpiaogou section	Yang et al., 2020--Proceedings of the National Academy of Sciences of the United States of America
61	132.6	0.9	Tuff	Zircon	SIMS U-Pb	Huajiying	Sichakou Basin	Tuanpiaogou section	Yang et al., 2020--Proceedings of the National Academy of Sciences of the United States of America
62	129.5	0.9	Tuffaceous sandstone	Zircon	SIMS U-Pb	Huajiying	Sichakou Basin	Jiecaigou section	Yang et al., 2020--Proceedings of the National Academy of Sciences of the United States of America
63	135.4	1.2	Tuffaceous sandstone	Zircon	SIMS U-Pb	Huajiying	Sichakou Basin	Jiecaigou section	Yang et al., 2020--Proceedings of the National Academy of Sciences of the United States of America
64	134.8	0.6	Tuff	Zircon	MC-ICP-MS	Dabeigou	Luanping Basin	Yushuxia section	Zhang et al., 2022--Palaeogeography, Palaeoclimatology, Palaeoecology
65	134.4	0.4	Sandy tuff	Zircon	MC-ICP-MS	Dabeigou	Luanping Basin	Yushuxia section	Zhang et al., 2022--Palaeogeography, Palaeoclimatology, Palaeoecology
66	131.5	0.4	Tuffaceous sandstone	Zircon	MC-ICP-MS	Dabeigou	Luanping Basin	Yushuxia section	Zhang et al., 2022--Palaeogeography, Palaeoclimatology, Palaeoecology
67	130.5	0.4	Bentonite	Zircon	MC-ICP-MS	Dabeigou	Luanping Basin	Yushuxia section	Zhang et al., 2022--Palaeogeography, Palaeoclimatology, Palaeoecology
68	132.4				Cyclostratigraphic analysis	Dabeigou	Luanping Basin	Yushuxia section	Fang et al., 2022--Palaeogeography, Palaeoclimatology, Palaeoecology
69	130.7				Cyclostratigraphic analysis	Dabeigou	Luanping Basin	Yushuxia section	Fang et al., 2022--Palaeogeography, Palaeoclimatology, Palaeoecology
70	133.3				Cyclostratigraphic analysis	Dabeigou	Luanping Basin	Yushuxia section	Liu et al., 2020--Frontiers in Earth Science
71	130.8				Cyclostratigraphic analysis	Dabeigou	Luanping Basin	Yushuxia section	Liu et al., 2020--Frontiers in Earth Science
72	125.783		Airfall ash	Zircon	CA-TIMS	Yixian	Yanshan Mountains	Huangbanjigou outcrop	Maclennan et al., 2024--PNAS
73	125.835		Airfall ash	Zircon	CA-TIMS	Yixian	Yanshan Mountains	Huangbanjigou core	Maclennan et al., 2024--PNAS
74	125.83		Volcaniclastic	Zircon	CA-TIMS	Yixian	Yanshan Mountains	Huangbanjigou core	Maclennan et al., 2024--PNAS
75	125.882		Volcaniclastic mudstone	Zircon	CA-TIMS	Yixian	Yanshan Mountains	Sanbaoyingcun	Maclennan et al., 2024--PNAS
76	124.1	1.2	Sandstone	Zircon	LA-ICP-MS	Baiwan	Baiwan Basin	Zhenping	Song et al., 2024--Cretaceous Research
77	123.6	0.6	Sandstone	Zircon	LA-ICP-MS	Baiwan	Baiwan Basin	Zhenping	Song et al., 2024--Cretaceous Research
